# Supplementary material for: A Comprehensive Transcriptomic and Proteomics Analysis of Candidate Secretory Proteins in Rose Grain Aphid, Metopolophium dirhodum (Walker)
Source: Preprints.org preprint supplement (doi:10.20944/preprints202408.1804.v1), 2024-08-26
Supplement: Supplementary file 1 [file Supplementary Files.xlsx]

## Sheet: Table S1
Table S1. List of unigenes assembled from the transcriptomic sequence of rose grain aphid
S/N	Genes	Gene Length	NR GI	NR ID	NR Score	NR Evalue	NR Description	NT GI	NT ID	NT Score	NT Evalue	NT Description	KO ID	KO Name	KO Description	Http Link	Swissprot ID	Swissprot Score	Swissprot Evalue	Swissprot Description	PFAM ID	PFAM description	Gene Ontology Biological Pathway	BP Description	Gene Ontology Molecular Function	MF Description	Gene Ontology Cellular Component	CC Description	KOG ID	KOG Description
1	Cluster-9477.0	4686	8337597	XP_008179841.2	2371	4e-264	PREDICTED: uncharacterized protein LOC100165959 [Acyrthosiphon pisum]	XM_008181619.2	XM_008181619	2741	0	PREDICTED: Acyrthosiphon pisum uncharacterized LOC100165959 (LOC100165959), mRNA	--	--	--	--	--	--	--	--	PF09726//PF07565//PF07228	Transmembrane protein//Band 3 cytoplasmic domain//Stage II sporulation protein E (SpoIIE)	GO:0006820	anion transport	GO:0003824//GO:0008509	catalytic activity//anion transmembrane transporter activity	GO:0016021	integral component of membrane	--	--
2	Cluster-5283.1	1134	--	--	--	--	--	--	--	--	--	--	--	--	--	--	--	--	--	--	--	--	--	--	--	--	--	--	--	--
3	Cluster-5283.0	333	--	--	--	--	--	--	--	--	--	--	--	--	--	--	--	--	--	--	--	--	--	--	--	--	--	--	--	--
4	Cluster-7022.0	2040	4416684	XP_008186018.1	2546	8.8e-285	PREDICTED: ubiquitin carboxyl-terminal hydrolase 22 isoform X1 [Acyrthosiphon pisum]	XM_008187796.2	XM_008187796	1804	0	PREDICTED: Acyrthosiphon pisum ubiquitin carboxyl-terminal hydrolase 22 (LOC100160106), transcript variant X1, mRNA	K11366	USP22_27_51, UBP8	ubiquitin carboxyl-terminal hydrolase 22/27/51	http://www.genome.jp/dbget-bin/www_bget?ko:K11366	Q5DU02	769	3.8e-80	Ubiquitin carboxyl-terminal hydrolase 22 OS=Mus musculus OX=10090 GN=Usp22 PE=2 SV=2	PF02148//PF00443	Zn-finger in ubiquitin-hydrolases and other protein//Ubiquitin carboxyl-terminal hydrolase	GO:0016579	protein deubiquitination	GO:0036459//GO:0008270	ubiquitinyl hydrolase activity//zinc ion binding	--	--	KOG1867	Ubiquitin-specific protease
5	Cluster-11016.0	3280	1167751	XP_001948615.1	1770	1.4e-194	PREDICTED: chromobox protein homolog 2 [Acyrthosiphon pisum]	XM_015508927.1	XM_015508927	1916	0	PREDICTED: Diuraphis noxia chromobox protein homolog 2 (LOC107162145), mRNA	K11453	CBX6	chromobox protein 6	http://www.genome.jp/dbget-bin/www_bget?ko:K11453	Q9DBY5	238	2.3e-18	Chromobox protein homolog 6 OS=Mus musculus OX=10090 GN=Cbx6 PE=1 SV=2	--	--	--	--	--	--	--	--	--	--
6	Cluster-8671.0	497	--	--	--	--	--	XM_016808119.1	XM_016808119	187	3.1e-91	PREDICTED: Acyrthosiphon pisum uncharacterized LOC100572874 (LOC100572874), transcript variant X4, mRNA	--	--	--	--	--	--	--	--	--	--	--	--	--	--	--	--	--	--
7	Cluster-5073.0	2261	2474950	XP_001949466.2	2512	8.5e-281	PREDICTED: UDP-glucuronosyltransferase 2C1-like [Acyrthosiphon pisum]	XM_001949431.4	XM_001949431	1640	0	PREDICTED: Acyrthosiphon pisum UDP-glucuronosyltransferase 2C1-like (LOC100160324), mRNA	K00699	UGT	glucuronosyltransferase	http://www.genome.jp/dbget-bin/www_bget?ko:K00699	P36514	628	9.3e-64	UDP-glucuronosyltransferase 2C1 (Fragment) OS=Oryctolagus cuniculus OX=9986 GN=UGT2C1 PE=2 SV=1	PF04101//PF00201	Glycosyltransferase family 28 C-terminal domain//UDP-glucoronosyl and UDP-glucosyl transferase	GO:0008152	metabolic process	GO:0016758	transferase activity, transferring hexosyl groups	--	--	--	--
8	Cluster-6487.0	314	--	--	--	--	--	--	--	--	--	--	--	--	--	--	--	--	--	--	--	--	--	--	--	--	--	--	--	--
9	Cluster-1803.0	1601	1595231	BAH71792.1	1072	5.7e-114	ACYPI007447 [Acyrthosiphon pisum]	NM_001246134.1	AK341386	698	0	Acyrthosiphon pisum uncharacterized protein LOC100166588 (LOC100166588), mRNA >dbj|AK341386.1| Acyrthosiphon pisum ACYPI007447 mRNA, clone: 637O23, complete cds, full-insert cDNA sequence based on the ESTs (5'-EST:FF321511, 3'-EST:FF322212)	--	--	--	--	--	--	--	--	PF03425	Carbohydrate binding domain (family 11)	GO:0005985//GO:0005982//GO:0030245	sucrose metabolic process//starch metabolic process//cellulose catabolic process	GO:0008810	cellulase activity	--	--	--	--
10	Cluster-13010.0	1765	--	--	--	--	--	--	--	--	--	--	--	--	--	--	--	--	--	--	PF06257	Biofilm formation stimulator VEG	GO:0042710	biofilm formation	--	--	--	--	--	--
11	Cluster-2997.0	352	--	--	--	--	--	--	--	--	--	--	--	--	--	--	--	--	--	--	--	--	--	--	--	--	--	--	--	--
12	Cluster-9560.1	347	10799409	XP_022163705.1	553	1.9e-54	SET and MYND domain-containing protein 4-like [Myzus persicae]	XM_016807868.1	XM_016807868	307	4.13e-158	PREDICTED: Acyrthosiphon pisum SET and MYND domain-containing protein 4 (LOC100160262), transcript variant X2, mRNA	--	--	--	--	--	--	--	--	PF00856	SET domain	--	--	GO:0005515	protein binding	--	--	--	--
13	Cluster-9560.0	375	2478984	XP_003248160.1	612	2.9e-61	PREDICTED: SET and MYND domain-containing protein 4-like [Acyrthosiphon pisum]	XM_003248112.3	XM_003248112	324	1.59e-167	PREDICTED: Acyrthosiphon pisum SET and MYND domain-containing protein 4-like (LOC100569491), mRNA	--	--	--	--	--	--	--	--	--	--	--	--	--	--	--	--	--	--
14	Cluster-1212.0	3635	4413007	XP_008179850.1	5476	0	PREDICTED: LOW QUALITY PROTEIN: probable phospholipid-transporting ATPase IA [Acyrthosiphon pisum]	XM_008181628.2	XM_008181628	3332	0	PREDICTED: Acyrthosiphon pisum probable phospholipid-transporting ATPase IA (LOC100166343), mRNA	K14802	DRS2, ATP8A	phospholipid-transporting ATPase	http://www.genome.jp/dbget-bin/www_bget?ko:K14802	Q29449	2952	0	Probable phospholipid-transporting ATPase IA OS=Bos taurus OX=9913 GN=ATP8A1 PE=1 SV=2	--	--	--	--	--	--	--	--	KOG0206	P-type ATPase
15	Cluster-6152.0	2681	4412588	XP_008179097.1	1208	1.6e-129	PREDICTED: 6-phosphogluconolactonase [Acyrthosiphon pisum]	AK343184.1	AK343184	1004	0	Acyrthosiphon pisum mRNA, clone: 104G7, full-insert cDNA sequence based on the ESTs (5'-EST:EX618910, 3'-EST:EX618727)	K01057	PGLS, pgl, devB	6-phosphogluconolactonase	http://www.genome.jp/dbget-bin/www_bget?ko:K01057	O95336	541	1.4e-53	6-phosphogluconolactonase OS=Homo sapiens OX=9606 GN=PGLS PE=1 SV=2	PF01182	Glucosamine-6-phosphate isomerases/6-phosphogluconolactonase	GO:0005975	carbohydrate metabolic process	--	--	--	--	KOG3147	6-phosphogluconolactonase - like protein
16	Cluster-10832.0	774	--	--	--	--	--	XM_003243182.3	XM_003243182	104	6.84e-45	PREDICTED: Acyrthosiphon pisum interferon regulatory factor 2-binding protein-like B (LOC100165595), transcript variant X2, mRNA	--	--	--	--	--	--	--	--	PF02724	CDC45-like protein	GO:0006270	DNA replication initiation	--	--	--	--	--	--
17	Cluster-10832.1	1566	10801840	XP_022166403.1	2008	1.6e-222	cyclin-dependent kinase 8 isoform X4 [Myzus persicae]	XM_016803538.1	XM_016803538	1169	0	PREDICTED: Acyrthosiphon pisum cyclin-dependent kinase 8 (LOC100168871), mRNA	K02208	CDK8_11	cyclin-dependent kinase 8/11	http://www.genome.jp/dbget-bin/www_bget?ko:K02208	Q17IE8	1739	9.6e-193	Cyclin-dependent kinase 8 OS=Aedes aegypti OX=7159 GN=Cdk8 PE=3 SV=2	PF07714//PF00069	Protein tyrosine kinase//Protein kinase domain	GO:0006468	protein phosphorylation	GO:0004672//GO:0005524	protein kinase activity//ATP binding	--	--	KOG0666	Cyclin C-dependent kinase CDK8
18	Cluster-6463.0	2599	7697043	XP_015369443.1	3473	0	PREDICTED: nuclear valosin-containing protein-like [Diuraphis noxia]	XM_001948341.4	XM_001948341	1872	0	PREDICTED: Acyrthosiphon pisum nuclear valosin-containing protein-like (LOC100164710), mRNA	K14571	RIX7, NVL	ribosome biogenesis ATPase	http://www.genome.jp/dbget-bin/www_bget?ko:K14571	Q9DBY8	1687	1.7e-186	Nuclear valosin-containing protein-like OS=Mus musculus OX=10090 GN=Nvl PE=1 SV=1	PF00004//PF05496//PF00931//PF06068//PF01443//PF00910//PF07726//PF01057//PF06414//PF07724//PF00005//PF00158//PF07728//PF02367//PF14532//PF02562//PF01695	ATPase family associated with various cellular activities (AAA)//Holliday junction DNA helicase ruvB N-terminus//NB-ARC domain//TIP49 C-terminus//Viral (Superfamily 1) RNA helicase//RNA helicase//ATPase family associated with various cellular activities (AAA)//Parvovirus non-structural protein NS1//Zeta toxin//AAA domain (Cdc48 subfamily)//ABC transporter//Sigma-54 interaction domain//AAA domain …	GO:0006355//GO:0006281//GO:0006310//GO:0019079//GO:0002949	regulation of transcription, DNA-templated//DNA repair//DNA recombination//viral genome replication//tRNA threonylcarbamoyladenosine modification	GO:0003724//GO:0016887//GO:0003678//GO:0043531//GO:0003723//GO:0016301//GO:0008134//GO:0005524//GO:0009378	RNA helicase activity//ATPase activity//DNA helicase activity//ADP binding//RNA binding//kinase activity//transcription factor binding//ATP binding//four-way junction helicase activity	GO:0005657//GO:0005667//GO:0009379	replication fork//transcription factor complex//Holliday junction helicase complex	KOG0733	Nuclear AAA ATPase (VCP subfamily)
19	Cluster-8701.0	3901	2477909	XP_001943895.2	4184	0	PREDICTED: neurogenic locus protein delta [Acyrthosiphon pisum]	XM_001943860.4	XM_001943860	3354	0	PREDICTED: Acyrthosiphon pisum neurogenic locus protein delta (LOC100160703), mRNA	K06051	DLL	delta	http://www.genome.jp/dbget-bin/www_bget?ko:K06051	P10041	1501	9.5e-165	Neurogenic locus protein delta OS=Drosophila melanogaster OX=7227 GN=Dl PE=1 SV=2	PF01414//PF07657//PF07645//PF00008//PF13965	Delta serrate ligand//N terminus of Notch ligand//Calcium-binding EGF domain//EGF-like domain//dsRNA-gated channel SID-1	GO:0007275//GO:0007154//GO:0015931//GO:0007219//GO:0033227	multicellular organismal development//cell communication//nucleobase-containing compound transport//Notch signaling pathway//dsRNA transport	GO:0051033//GO:0005509//GO:0005515	RNA transmembrane transporter activity//calcium ion binding//protein binding	GO:0016020//GO:0016021	membrane//integral component of membrane	--	--
20	Cluster-5160.0	1188	4412866	XP_008179597.1	853	1.1e-88	PREDICTED: uncharacterized protein LOC100573735 [Acyrthosiphon pisum]	XM_008181375.1	XM_008181375	366	0	PREDICTED: Acyrthosiphon pisum uncharacterized LOC100573735 (LOC100573735), mRNA	--	--	--	--	--	--	--	--	PF05485//PF00172	THAP domain//Fungal Zn(2)-Cys(6) binuclear cluster domain	GO:0006355	regulation of transcription, DNA-templated	GO:0003676//GO:0000981//GO:0008270	nucleic acid binding//RNA polymerase II transcription factor activity, sequence-specific DNA binding//zinc ion binding	GO:0005634	nucleus	--	--
21	Cluster-1899.0	2537	8349301	XP_016661552.1	3537	0	PREDICTED: phosphorylated CTD-interacting factor 1 [Acyrthosiphon pisum]	XM_016806063.1	XM_016806063	2238	0	PREDICTED: Acyrthosiphon pisum phosphorylated CTD-interacting factor 1 (LOC100159733), transcript variant X1, mRNA	K17584	PCIF1	phosphorylated CTD-interacting factor 1	http://www.genome.jp/dbget-bin/www_bget?ko:K17584	Q9H4Z3	1414	7.5e-155	Phosphorylated CTD-interacting factor 1 OS=Homo sapiens OX=9606 GN=PCIF1 PE=1 SV=1	PF02732//PF00397	ERCC4 domain//WW domain	--	--	GO:0004518//GO:0005515//GO:0003677	nuclease activity//protein binding//DNA binding	--	--	--	--
22	Cluster-3157.0	1426	1167628	XP_001945165.1	1489	2.3e-162	PREDICTED: alpha-tocopherol transfer protein [Acyrthosiphon pisum]	XM_001945130.4	XM_001945130	1130	0	PREDICTED: Acyrthosiphon pisum alpha-tocopherol transfer protein (LOC100160762), mRNA	--	--	--	--	Q9D3D0	148	2.7e-08	Alpha-tocopherol transfer protein-like OS=Mus musculus OX=10090 GN=Ttpal PE=1 SV=3	--	--	--	--	--	--	--	--	--	--
23	Cluster-11830.0	2746	8348441	XP_016660679.1	2823	0	PREDICTED: chloride channel protein 2 isoform X2 [Acyrthosiphon pisum]	XM_008185792.2	XM_008185792	1887	0	PREDICTED: Acyrthosiphon pisum chloride channel protein 2 (LOC100166352), transcript variant X6, mRNA	K05011	CLCN2	chloride channel 2	http://www.genome.jp/dbget-bin/www_bget?ko:K05011	Q9VGH7	1314	3.2e-143	Chloride channel protein 2 OS=Drosophila melanogaster OX=7227 GN=ClC-a PE=2 SV=3	PF00654	Voltage gated chloride channel	GO:0055085//GO:0006821	transmembrane transport//chloride transport	GO:0005247	voltage-gated chloride channel activity	GO:0016020	membrane	KOG0476	Cl- channel CLC-2 and related proteins (CLC superfamily)
24	Cluster-9500.0	690	--	--	--	--	--	--	--	--	--	--	--	--	--	--	--	--	--	--	--	--	--	--	--	--	--	--	--	--
25	Cluster-8410.0	699	--	--	--	--	--	--	--	--	--	--	--	--	--	--	--	--	--	--	--	--	--	--	--	--	--	--	--	--
26	Cluster-3052.0	622	10805327	XP_022170254.1	1051	6.1e-112	activating signal cointegrator 1 complex subunit 3 [Myzus persicae]	XM_008186817.2	XM_008186817	601	0	PREDICTED: Acyrthosiphon pisum activating signal cointegrator 1 complex subunit 3 (LOC100165052), mRNA	K18663	ASCC3	activating signal cointegrator complex subunit 3	http://www.genome.jp/dbget-bin/www_bget?ko:K18663	F1NTD6	672	2e-69	Activating signal cointegrator 1 complex subunit 3 OS=Gallus gallus OX=9031 GN=ascc3 PE=3 SV=2	PF00270//PF04851	DEAD/DEAH box helicase//Type III restriction enzyme, res subunit	--	--	GO:0005524//GO:0003676//GO:0016787//GO:0003677	ATP binding//nucleic acid binding//hydrolase activity//DNA binding	--	--	KOG0952	DNA/RNA helicase MER3/SLH1, DEAD-box superfamily
27	Cluster-6522.0	1010	2474251	XP_003240426.1	1263	2.6e-136	PREDICTED: 15-hydroxyprostaglandin dehydrogenase [NAD..+..] isoform X1 [Acyrthosiphon pisum]	XM_003240378.3	XM_003240378	782	0	PREDICTED: Acyrthosiphon pisum 15-hydroxyprostaglandin dehydrogenase [NAD(+)] (LOC100573759), transcript variant X1, mRNA	K00069	HPGD	15-hydroxyprostaglandin dehydrogenase (NAD)	http://www.genome.jp/dbget-bin/www_bget?ko:K00069	Q8VCC1	347	1.6e-31	15-hydroxyprostaglandin dehydrogenase [NAD(+)] OS=Mus musculus OX=10090 GN=Hpgd PE=1 SV=1	PF01370//PF01073//PF00106	NAD dependent epimerase/dehydratase family//3-beta hydroxysteroid dehydrogenase/isomerase family//short chain dehydrogenase	GO:0008207//GO:0055114//GO:0008210//GO:0006694//GO:0008152//GO:0008209	C21-steroid hormone metabolic process//oxidation-reduction process//estrogen metabolic process//steroid biosynthetic process//metabolic process//androgen metabolic process	GO:0016491//GO:0016616//GO:0003824//GO:0050662//GO:0003854	oxidoreductase activity//oxidoreductase activity, acting on the CH-OH group of donors, NAD or NADP as acceptor//catalytic activity//coenzyme binding//3-beta-hydroxy-delta5-steroid dehydrogenase activity	--	--	--	--
28	Cluster-11659.0	1167	2474455	XP_001944669.2	2043	1.1e-226	PREDICTED: myotubularin-related protein 14 [Acyrthosiphon pisum]	XM_001944634.4	XM_001944634	1083	0	PREDICTED: Acyrthosiphon pisum myotubularin-related protein 14 (LOC100163933), mRNA	K18086	MTMR14	myotubularin-related protein 14	http://www.genome.jp/dbget-bin/www_bget?ko:K18086	Q8VEL2	748	5.8e-78	Myotubularin-related protein 14 OS=Mus musculus OX=10090 GN=Mtmr14 PE=1 SV=2	PF01580//PF00102	FtsK/SpoIIIE family//Protein-tyrosine phosphatase	GO:0006570//GO:0006470	tyrosine metabolic process//protein dephosphorylation	GO:0005524//GO:0004725//GO:0003677//GO:0000166	ATP binding//protein tyrosine phosphatase activity//DNA binding//nucleotide binding	--	--	--	--
29	Cluster-8942.1	469	--	--	--	--	--	--	--	--	--	--	--	--	--	--	--	--	--	--	--	--	--	--	--	--	--	--	--	--
30	Cluster-56.0	387	--	--	--	--	--	--	--	--	--	--	--	--	--	--	--	--	--	--	--	--	--	--	--	--	--	--	--	--
31	Cluster-4711.0	302	--	--	--	--	--	CP013190.1	CP013190	302	2.13e-155	Escherichia coli strain FORC_031, complete genome	--	--	--	--	--	--	--	--	--	--	--	--	--	--	--	--	--	--
32	Cluster-12721.0	2308	6761689	XP_014276782.1	2178	4.7e-242	GTP-binding protein 1 isoform X1 [Halyomorpha halys]	XM_001951642.4	XM_001951642	2043	0	PREDICTED: Acyrthosiphon pisum GTP-binding protein 1 (LOC100163546), mRNA	--	--	--	--	Q5XGS8	1824	2e-202	GTP-binding protein 1 OS=Xenopus laevis OX=8355 GN=gtpbp1 PE=2 SV=1	PF03144//PF00005//PF01926	Elongation factor Tu domain 2//ABC transporter//50S ribosome-binding GTPase	--	--	GO:0005524//GO:0005525//GO:0016887	ATP binding//GTP binding//ATPase activity	--	--	KOG0458	Elongation factor 1 alpha
33	Cluster-6175.0	1639	1167752	XP_001949879.1	2304	8.1e-257	PREDICTED: zinc finger CCHC domain-containing protein 4 [Acyrthosiphon pisum]	XM_001949844.4	XM_001949844	1231	0	PREDICTED: Acyrthosiphon pisum zinc finger CCHC domain-containing protein 4 (LOC100167767), mRNA	--	--	--	--	D3ZV31	781	1.2e-81	Zinc finger CCHC domain-containing protein 4 OS=Rattus norvegicus OX=10116 GN=Zcchc4 PE=3 SV=1	PF02472//PF10237	Biopolymer transport protein ExbD/TolR//Probable N6-adenine methyltransferase	GO:0006810	transport	GO:0005215//GO:0008168	transporter activity//methyltransferase activity	GO:0016020	membrane	KOG4399	C2HC-type Zn-finger protein
34	Cluster-10612.0	1055	1624575	NP_001155388.1	1399	4.6e-152	DHFR-coamplified protein-like precursor [Acyrthosiphon pisum]	NM_001161916.2	NM_001161916	929	0	Acyrthosiphon pisum DHFR-coamplified protein-like (LOC100159088), mRNA	--	--	--	--	Q6UXP7	246	8.6e-20	Protein FAM151B OS=Homo sapiens OX=9606 GN=FAM151B PE=1 SV=2	--	--	--	--	--	--	--	--	KOG3748	Uncharacterized conserved protein
35	Cluster-12555.0	4674	10705955	XP_021938240.1	5570	0	cytoplasmic FMR1-interacting protein isoform X1 [Zootermopsis nevadensis]	XM_001949614.3	XM_001949614	3461	0	PREDICTED: Acyrthosiphon pisum cytoplasmic FMR1-interacting protein (LOC100159491), mRNA	K05749	CYFIP	cytoplasmic FMR1 interacting protein	http://www.genome.jp/dbget-bin/www_bget?ko:K05749	Q9VF87	5044	0	Cytoplasmic FMR1-interacting protein OS=Drosophila melanogaster OX=7227 GN=Sra-1 PE=1 SV=1	--	--	--	--	--	--	--	--	KOG3534	p53 inducible protein PIR121
36	Cluster-10432.0	380	4410962	XP_008178972.1	448	3.1e-42	PREDICTED: probable WRKY transcription factor protein 1 isoform X2 [Acyrthosiphon pisum]	XM_008180750.2	XM_008180750	214	2.28e-106	PREDICTED: Acyrthosiphon pisum probable WRKY transcription factor protein 1 (LOC100575183), transcript variant X2, mRNA	--	--	--	--	--	--	--	--	--	--	--	--	--	--	--	--	--	--
37	Cluster-9834.0	2820	2478591	XP_001944165.2	3244	0	PREDICTED: amyloid protein-binding protein 2 isoform X1 [Acyrthosiphon pisum]	XM_001944130.4	XM_001944130	2133	0	PREDICTED: Acyrthosiphon pisum amyloid protein-binding protein 2 (LOC100159970), transcript variant X1, mRNA	--	--	--	--	Q9DAX9	593	1.3e-59	Amyloid protein-binding protein 2 OS=Mus musculus OX=10090 GN=Appbp2 PE=2 SV=1	PF00515//PF13414//PF13181//PF13374//PF13176	Tetratricopeptide repeat//TPR repeat//Tetratricopeptide repeat//Tetratricopeptide repeat//Tetratricopeptide repeat	--	--	GO:0005515	protein binding	--	--	KOG1840	Kinesin light chain
38	Cluster-1294.0	417	8349058	XP_016661310.1	592	6.8e-59	PREDICTED: coiled-coil domain-containing protein 170 isoform X2 [Acyrthosiphon pisum]	XM_016805821.1	XM_016805821	388	0	PREDICTED: Acyrthosiphon pisum coiled-coil domain-containing protein 170 (LOC100168669), transcript variant X2, mRNA	--	--	--	--	Q8IYT3	158	5.4e-10	Coiled-coil domain-containing protein 170 OS=Homo sapiens OX=9606 GN=CCDC170 PE=1 SV=3	PF04508//PF15898//PF02601	Viral A-type inclusion protein repeat//cGMP-dependent protein kinase interacting domain//Exonuclease VII, large subunit	GO:0016032//GO:0006308	viral process//DNA catabolic process	GO:0008855//GO:0019901	exodeoxyribonuclease VII activity//protein kinase binding	GO:0009318	exodeoxyribonuclease VII complex	--	--
39	Cluster-2511.0	349	8350090	XP_016662337.1	472	4.7e-45	PREDICTED: ring canal kelch homolog isoform X4 [Acyrthosiphon pisum]	XM_016801500.1	XM_016801500	248	2.61e-125	PREDICTED: Acyrthosiphon pisum ring canal kelch homolog (LOC100158704), transcript variant X4, mRNA	K10443	KLHL2_3	kelch-like protein 2/3	http://www.genome.jp/dbget-bin/www_bget?ko:K10443	Q70JS2	240	1.4e-19	Ring canal kelch homolog OS=Anopheles stephensi OX=30069 GN=kel PE=2 SV=2	PF07646//PF01344	Kelch motif//Kelch motif	--	--	GO:0005515	protein binding	--	--	--	--
40	Cluster-7747.1	583	10815771	XP_022181777.1	692	2.4e-70	guanine nucleotide exchange factor MSS4 homolog [Myzus persicae]	XM_001943202.4	XM_001943202	478	0	PREDICTED: Acyrthosiphon pisum guanine nucleotide exchange factor MSS4 homolog (LOC100169200), mRNA	--	--	--	--	Q9VLP3	251	1.2e-20	Guanine nucleotide exchange factor MSS4 homolog OS=Drosophila melanogaster OX=7227 GN=CG7787 PE=2 SV=2	PF04421	Mss4 protein	GO:0007264//GO:0043087	small GTPase mediated signal transduction//regulation of GTPase activity	GO:0005085	guanyl-nucleotide exchange factor activity	--	--	KOG4113	Guanine nucleotide exchange factor
41	Cluster-8645.0	739	10803845	XP_022168624.1	370	6.7e-33	histone H1A, sperm-like [Myzus persicae]	XM_003246537.3	XM_003246537	603	0	PREDICTED: Acyrthosiphon pisum histone H1A, sperm-like (LOC100574891), mRNA	K11275	H1_5	histone H1/5	http://www.genome.jp/dbget-bin/www_bget?ko:K11275	Q24704	242	1.7e-19	Histone H1.1 OS=Drosophila virilis OX=7244 GN=His1.1 PE=3 SV=1	PF00538	linker histone H1 and H5 family	GO:0006334	nucleosome assembly	GO:0003677	DNA binding	GO:0005634//GO:0000786	nucleus//nucleosome	--	--
42	Cluster-865.0	545	7704240	XP_015377520.1	434	1.9e-40	PREDICTED: RNA-directed DNA polymerase from mobile element jockey-like [Diuraphis noxia]	--	--	--	--	--	--	--	--	--	--	--	--	--	--	--	--	--	--	--	--	--	--	--
43	Cluster-12711.0	390	--	--	--	--	--	--	--	--	--	--	--	--	--	--	--	--	--	--	--	--	--	--	--	--	--	--	--	--
44	Cluster-7642.0	318	8333198	XP_016656063.1	141	1e-06	PREDICTED: uncharacterized protein LOC107882345 [Acyrthosiphon pisum]	--	--	--	--	--	--	--	--	--	--	--	--	--	--	--	--	--	--	--	--	--	--	--
45	Cluster-12182.0	1320	--	--	--	--	--	--	--	--	--	--	--	--	--	--	--	--	--	--	--	--	--	--	--	--	--	--	--	--
46	Cluster-4723.0	4266	4417636	XP_008187574.1	1698	3.9e-186	PREDICTED: uncharacterized protein LOC100166850 [Acyrthosiphon pisum]	XM_015518740.1	XM_015518740	2379	0	PREDICTED: Diuraphis noxia uncharacterized LOC107169101 (LOC107169101), mRNA	--	--	--	--	O62674	384	3.5e-35	Pro-interleukin-16 OS=Chlorocebus aethiops OX=9534 GN=IL16 PE=2 SV=1	PF13180//PF00595	PDZ domain//PDZ domain (Also known as DHR or GLGF)	--	--	GO:0005515	protein binding	--	--	KOG3528	FOG: PDZ domain
47	Cluster-11799.0	2091	4551251	KFB35036.1	1915	1.3e-211	AGAP002499-PA-like protein [Anopheles sinensis]	XM_001943990.4	XM_001943990	1644	0	PREDICTED: Acyrthosiphon pisum probable methylmalonate-semialdehyde dehydrogenase [acylating], mitochondrial (LOC100168589), mRNA	K00140	mmsA, iolA, ALDH6A1	malonate-semialdehyde dehydrogenase (acetylating) / methylmalonate-semialdehyde dehydrogenase	http://www.genome.jp/dbget-bin/www_bget?ko:K00140	Q7QC84	1912	1.1e-212	Probable methylmalonate-semialdehyde dehydrogenase [acylating], mitochondrial OS=Anopheles gambiae OX=7165 GN=AGAP002499 PE=3 SV=2	PF00171	Aldehyde dehydrogenase family	GO:0055114//GO:0008152	oxidation-reduction process//metabolic process	GO:0016491	oxidoreductase activity	--	--	KOG2449	Methylmalonate semialdehyde dehydrogenase
48	Cluster-9080.0	302	--	--	--	--	--	CP017979.1	CP017979	302	2.13e-155	Escherichia coli str. K-12 substr. W3110 substrain ZK126 genome	--	--	--	--	P37660	446	1.6e-43	Inner membrane transport protein YhjV OS=Escherichia coli (strain K12) OX=83333 GN=yhjV PE=1 SV=1	--	--	--	--	--	--	--	--	--	--
49	Cluster-8368.0	677	--	--	--	--	--	XM_008185638.2	XM_008185638	607	0	PREDICTED: Acyrthosiphon pisum transcriptional enhancer factor TEF-1 (LOC100160350), transcript variant X7, mRNA	--	--	--	--	--	--	--	--	--	--	--	--	--	--	--	--	--	--
50	Cluster-11116.0	393	--	--	--	--	--	--	--	--	--	--	--	--	--	--	--	--	--	--	--	--	--	--	--	--	--	--	--	--
51	Cluster-10242.0	2534	8351606	XP_016663842.1	2905	0	PREDICTED: organic cation transporter protein isoform X1 [Acyrthosiphon pisum]	XM_016808353.1	XM_016808353	2251	0	PREDICTED: Acyrthosiphon pisum organic cation transporter protein (LOC100159286), transcript variant X2, mRNA	--	--	--	--	Q9VCA2	707	7.2e-73	Organic cation transporter protein OS=Drosophila melanogaster OX=7227 GN=Orct PE=1 SV=1	PF07690//PF00083	Major Facilitator Superfamily//Sugar (and other) transporter	GO:0055085	transmembrane transport	GO:0022857	transmembrane transporter activity	GO:0016021	integral component of membrane	--	--
52	Cluster-3959.1832	4529	7698015	XP_015370526.1	481	5.5e-45	PREDICTED: uncharacterized protein LOC107166394 [Diuraphis noxia]	XR_001506130.1	XR_001506130	68	4.27e-24	PREDICTED: Diuraphis noxia uncharacterized LOC107166394 (LOC107166394), transcript variant X3, misc_RNA	--	--	--	--	--	--	--	--	--	--	--	--	--	--	--	--	--	--
53	Cluster-924.0	367	2478263	XP_003247040.1	616	9.9e-62	PREDICTED: probable ubiquitin carboxyl-terminal hydrolase FAF-X [Acyrthosiphon pisum]	XM_003246992.3	XM_003246992	352	0	PREDICTED: Acyrthosiphon pisum probable ubiquitin carboxyl-terminal hydrolase FAF-X (LOC100167429), mRNA	K11840	USP9_24	ubiquitin carboxyl-terminal hydrolase 9/24	http://www.genome.jp/dbget-bin/www_bget?ko:K11840	Q93008	351	2e-32	Probable ubiquitin carboxyl-terminal hydrolase FAF-X OS=Homo sapiens OX=9606 GN=USP9X PE=1 SV=3	--	--	--	--	--	--	--	--	--	--
54	Cluster-3959.1830	1572	1168949	XP_001946172.1	1612	1.4e-176	PREDICTED: alpha-tocopherol transfer protein-like [Acyrthosiphon pisum]	XM_001946137.4	XM_001946137	1397	0	PREDICTED: Acyrthosiphon pisum alpha-tocopherol transfer protein-like (LOC100158845), mRNA	--	--	--	--	Q9BTX7	298	1.2e-25	Alpha-tocopherol transfer protein-like OS=Homo sapiens OX=9606 GN=TTPAL PE=1 SV=2	--	--	--	--	--	--	--	--	--	--
55	Cluster-3959.1831	844	4412680	XP_008179244.1	603	7.3e-60	PREDICTED: uncharacterized protein LOC100573202 [Acyrthosiphon pisum]	XM_003241852.3	XM_003241852	505	0	PREDICTED: Acyrthosiphon pisum uncharacterized LOC100573202 (LOC100573202), transcript variant X1, mRNA	--	--	--	--	--	--	--	--	--	--	--	--	--	--	--	--	--	--
56	Cluster-3959.1836	2380	1166893	XP_001951630.1	2711	7.6e-304	PREDICTED: uncharacterized protein LOC100163170 [Acyrthosiphon pisum]	XM_001951595.4	XM_001951595	2102	0	PREDICTED: Acyrthosiphon pisum uncharacterized LOC100163170 (LOC100163170), mRNA	--	--	--	--	--	--	--	--	--	--	--	--	--	--	--	--	--	--
57	Cluster-3959.1837	2793	10811165	XP_022176683.1	1684	1.1e-184	uncharacterized protein LOC111038066 isoform X1 [Myzus persicae]	XM_001946959.4	XM_001946959	2355	0	PREDICTED: Acyrthosiphon pisum uncharacterized LOC100161026 (LOC100161026), transcript variant X1, mRNA	--	--	--	--	--	--	--	--	--	--	--	--	--	--	--	--	--	--
58	Cluster-1327.0	416	5432343	XP_011566774.1	407	1.9e-37	PREDICTED: peroxisomal ..S..-2-hydroxy-acid oxidase GLO5-like [Plutella xylostella]	CP017979.1	CP017979	416	0	Escherichia coli str. K-12 substr. W3110 substrain ZK126 genome	--	--	--	--	A7ZTF9	427	3.5e-41	L-lactate dehydrogenase OS=Escherichia coli O139:H28 (strain E24377A / ETEC) OX=331111 GN=lldD PE=3 SV=1	PF01070	FMN-dependent dehydrogenase	--	--	GO:0016491	oxidoreductase activity	--	--	KOG0538	Glycolate oxidase
59	Cluster-3959.1835	2280	1168008	XP_001943100.1	2590	7.8e-290	PREDICTED: protein ERGIC-53 [Acyrthosiphon pisum]	XM_001943065.4	XM_001943065	1894	0	PREDICTED: Acyrthosiphon pisum protein ERGIC-53 (LOC100158856), mRNA	K10080	LMAN1, ERGIC53	lectin, mannose-binding 1	http://www.genome.jp/dbget-bin/www_bget?ko:K10080	Q9D0F3	1042	9.3e-112	Protein ERGIC-53 OS=Mus musculus OX=10090 GN=Lman1 PE=1 SV=1	PF03388	Legume-like lectin family	--	--	--	--	GO:0016020	membrane	KOG3839	Lectin VIP36, involved in the transport of glycoproteins carrying high mannose-type glycans
60	Cluster-12003.0	306	--	--	--	--	--	CP017979.1	CP017979	204	6.49e-101	Escherichia coli str. K-12 substr. W3110 substrain ZK126 genome	--	--	--	--	P0ACI4	213	1.7e-16	Xylose operon regulatory protein OS=Escherichia coli O6:H1 (strain CFT073 / ATCC 700928 / UPEC) OX=199310 GN=xylR PE=3 SV=1	PF12833//PF00165	Helix-turn-helix domain//Bacterial regulatory helix-turn-helix proteins, AraC family	GO:0006355	regulation of transcription, DNA-templated	GO:0043565//GO:0003700	sequence-specific DNA binding//transcription factor activity, sequence-specific DNA binding	GO:0005667	transcription factor complex	--	--
61	Cluster-3959.1838	3773	8343432	XP_016658990.1	2455	5.8e-274	PREDICTED: GPI transamidase component PIG-S [Acyrthosiphon pisum]	XM_001945235.4	XM_001945235	1680	0	PREDICTED: Acyrthosiphon pisum GPI transamidase component PIG-S (LOC100165236), transcript variant X1, mRNA	K13109	IK, RED, RER	IK cytokine	http://www.genome.jp/dbget-bin/www_bget?ko:K13109	Q5NVI3	721	2.6e-74	Protein Red OS=Pongo abelii OX=9601 GN=IK PE=2 SV=1	PF07808//PF01239//PF10510	RED-like protein N-terminal region//Protein prenyltransferase alpha subunit repeat//Phosphatidylinositol-glycan biosynthesis class S protein	GO:0018342//GO:0016255	protein prenylation//attachment of GPI anchor to protein	GO:0008318	protein prenyltransferase activity	GO:0005634//GO:0042765	nucleus//GPI-anchor transamidase complex	KOG2498	IK cytokine down-regulator of HLA class II
62	Cluster-3959.1839	902	1594118	BAH70677.1	504	2.4e-48	ACYPI000043 [Acyrthosiphon pisum]	NM_001126195.2	NM_001126195	500	0	Acyrthosiphon pisum ATP synthase, H+ transporting, mitochondrial F0 complex, subunit G (Atp5l), mRNA	K02140	ATPeFG, ATP5L, ATP20	F-type H+-transporting ATPase subunit g	http://www.genome.jp/dbget-bin/www_bget?ko:K02140	Q9CPQ8	255	6.6e-21	ATP synthase subunit g, mitochondrial OS=Mus musculus OX=10090 GN=Atp5l PE=1 SV=1	PF16668//PF04718	Adhesin from Campylobacter//Mitochondrial ATP synthase g subunit	GO:0007155//GO:0015992//GO:0015986	cell adhesion//proton transport//ATP synthesis coupled proton transport	GO:0015078	hydrogen ion transmembrane transporter activity	GO:0000276	mitochondrial proton-transporting ATP synthase complex, coupling factor F(o)	KOG4103	Mitochondrial F1F0-ATP synthase, subunit g/ATP20
63	Cluster-85.0	367	--	--	--	--	--	--	--	--	--	--	--	--	--	--	--	--	--	--	--	--	--	--	--	--	--	--	--	--
64	Cluster-6497.0	431	10796374	XP_022160341.1	190	2.9e-12	uncharacterized protein LOC111026554 [Myzus persicae]	--	--	--	--	--	--	--	--	--	--	--	--	--	--	--	--	--	--	--	--	--	--	--
65	Cluster-12467.0	563	--	--	--	--	--	XM_001948185.4	XM_001948185	448	0	PREDICTED: Acyrthosiphon pisum homeobox protein extradenticle (LOC100168368), transcript variant X2, mRNA	--	--	--	--	--	--	--	--	--	--	--	--	--	--	--	--	--	--
66	Cluster-11503.0	2563	1167275	XP_001947522.1	3098	0	PREDICTED: transmembrane protein 62 isoform X2 [Acyrthosiphon pisum]	XM_001947487.4	XM_001947487	1870	0	PREDICTED: Acyrthosiphon pisum transmembrane protein 62 (LOC100166277), transcript variant X2, mRNA	--	--	--	--	Q0P6H9	962	2e-102	Transmembrane protein 62 OS=Homo sapiens OX=9606 GN=TMEM62 PE=1 SV=1	--	--	--	--	--	--	--	--	--	--
67	Cluster-2944.0	508	--	--	--	--	--	--	--	--	--	--	--	--	--	--	--	--	--	--	--	--	--	--	--	--	--	--	--	--
68	Cluster-1276.0	620	5432293	XP_011566719.1	673	4.1e-68	PREDICTED: NAD..P..H-quinone oxidoreductase subunit 5, organellar chromatophore 1-like [Plutella xylostella]	CP013031.1	CP013031	620	0	Escherichia coli strain H1827/12, complete genome	--	--	--	--	P16429	731	2.9e-76	Formate hydrogenlyase subunit 3 OS=Escherichia coli (strain K12) OX=83333 GN=hycC PE=3 SV=2	--	--	--	--	--	--	--	--	--	--
69	Cluster-8247.0	1685	10815756	XP_022181760.1	580	6.8e-57	HIG1 domain family member 2A, mitochondrial [Myzus persicae]	XM_001950212.4	XM_001950212	510	0	PREDICTED: Acyrthosiphon pisum HIG1 domain family member 2A, mitochondrial (LOC100163016), mRNA	--	--	--	--	Q9BW72	188	7.3e-13	HIG1 domain family member 2A, mitochondrial OS=Homo sapiens OX=9606 GN=HIGD2A PE=1 SV=1	PF02035//PF04647	Coagulin//Accessory gene regulator B	GO:0009372//GO:0042381//GO:0009405	quorum sensing//hemolymph coagulation//pathogenesis	GO:0008233	peptidase activity	GO:0005576//GO:0016021	extracellular region//integral component of membrane	KOG4431	Uncharacterized protein, induced by hypoxia
70	Cluster-6360.0	415	--	--	--	--	--	--	--	--	--	--	--	--	--	--	--	--	--	--	--	--	--	--	--	--	--	--	--	--
71	Cluster-6360.1	2941	5888301	KMQ92168.1	396	2.6e-35	retrovirus-related pol polyprotein from transposon tnt 1-94 [Lasius niger]	AC202222.3	AC202222	320	2.26e-164	Acyrthosiphon pisum BAC VMRC38-10-A8 (Benaroya Research Institute VMRC38 Acrythosiphon pisum (Pea Aphid) BAC library) complete sequence	--	--	--	--	P04146	289	2.5e-24	Copia protein OS=Drosophila melanogaster OX=7227 GN=GIP PE=1 SV=3	PF00538	linker histone H1 and H5 family	GO:0006334	nucleosome assembly	GO:0003677	DNA binding	GO:0000786//GO:0005634	nucleosome//nucleus	--	--
72	Cluster-11855.0	319	--	--	--	--	--	--	--	--	--	--	--	--	--	--	--	--	--	--	--	--	--	--	--	--	--	--	--	--
73	Cluster-3727.0	2598	1167073	XP_001946644.1	2078	2.1e-230	PREDICTED: sugar transporter ERD6-like 6 isoform X1 [Acyrthosiphon pisum]	XM_001946609.4	XM_001946609	1747	0	PREDICTED: Acyrthosiphon pisum sugar transporter ERD6-like 6 (LOC100160251), transcript variant X1, mRNA	--	--	--	--	Q9FRL3	342	1.6e-30	Sugar transporter ERD6-like 6 OS=Arabidopsis thaliana OX=3702 GN=At1g75220 PE=1 SV=1	PF07690//PF00122//PF00083	Major Facilitator Superfamily//E1-E2 ATPase//Sugar (and other) transporter	GO:0055085	transmembrane transport	GO:0022857//GO:0046872//GO:0000166	transmembrane transporter activity//metal ion binding//nucleotide binding	GO:0016021	integral component of membrane	KOG0254	Predicted transporter (major facilitator superfamily)
74	Cluster-5148.0	1452	4417916	XP_008188044.1	1474	1.3e-160	PREDICTED: FIT family protein CG10671 [Acyrthosiphon pisum]	XM_008189822.2	XM_008189822	1300	0	PREDICTED: Acyrthosiphon pisum FIT family protein CG10671 (LOC103310693), mRNA	--	--	--	--	Q9VRJ2	599	1.4e-60	FIT family protein CG10671 OS=Drosophila melanogaster OX=7227 GN=CG10671 PE=1 SV=1	PF10261//PF00001	Inositol phospholipid synthesis and fat-storage-inducing TM//7 transmembrane receptor (rhodopsin family)	GO:0019915//GO:0007186	lipid storage//G-protein coupled receptor signaling pathway	GO:0004930	G-protein coupled receptor activity	GO:0016021//GO:0005789	integral component of membrane//endoplasmic reticulum membrane	--	--
75	Cluster-12680.10	1100	--	--	--	--	--	--	--	--	--	--	--	--	--	--	--	--	--	--	--	--	--	--	--	--	--	--	--	--
76	Cluster-12689.0	506	7693392	XP_015365408.1	386	6.4e-35	PREDICTED: longitudinals lacking protein, isoforms N..O..W..X..Y-like isoform X33 [Diuraphis noxia]	XM_015509922.1	XM_015509922	198	2.43e-97	PREDICTED: Diuraphis noxia longitudinals lacking protein, isoform G-like (LOC107162837), transcript variant X33, mRNA	--	--	--	--	--	--	--	--	--	--	--	--	--	--	--	--	--	--
77	Cluster-5338.0	3142	7689420	XP_015376872.1	2550	4.7e-285	PREDICTED: nibrin isoform X2 [Diuraphis noxia]	XM_008191844.2	XM_008191844	1437	0	PREDICTED: Acyrthosiphon pisum nibrin (LOC100162940), mRNA	K10867	NBN, NBS1	nijmegen breakage syndrome protein 1	http://www.genome.jp/dbget-bin/www_bget?ko:K10867	Q9DE07	356	4.5e-32	Nibrin OS=Gallus gallus OX=9031 GN=NBN PE=1 SV=1	PF00498	FHA domain	--	--	GO:0005515	protein binding	--	--	--	--
78	Cluster-6277.0	408	--	--	--	--	--	--	--	--	--	--	--	--	--	--	--	--	--	--	--	--	--	--	--	--	--	--	--	--
79	Cluster-7941.0	1158	--	--	--	--	--	--	--	--	--	--	--	--	--	--	--	--	--	--	--	--	--	--	--	--	--	--	--	--
80	Cluster-12719.0	2311	2474362	XP_001952155.2	3224	0	PREDICTED: uncharacterized protein LOC100164170 [Acyrthosiphon pisum]	XM_001952120.3	XM_001952120	2063	0	PREDICTED: Acyrthosiphon pisum uncharacterized LOC100164170 (LOC100164170), mRNA	--	--	--	--	--	--	--	--	PF06743	FAST kinase-like protein, subdomain 1	--	--	GO:0004672	protein kinase activity	--	--	--	--
81	Cluster-4618.0	997	--	--	--	--	--	--	--	--	--	--	--	--	--	--	--	--	--	--	--	--	--	--	--	--	--	--	--	--
82	Cluster-11032.0	1704	2478067	XP_001947654.2	2564	6e-287	PREDICTED: gamma-glutamyltranspeptidase 1-like isoform X2 [Acyrthosiphon pisum]	XM_001947619.4	XM_001947619	1484	0	PREDICTED: Acyrthosiphon pisum gamma-glutamyltranspeptidase 1-like (LOC100163904), transcript variant X2, mRNA	K18592	GGT1_5	gamma-glutamyltranspeptidase / glutathione hydrolase / leukotriene-C4 hydrolase	http://www.genome.jp/dbget-bin/www_bget?ko:K18592	P20735	878	7.2e-93	Glutathione hydrolase 1 proenzyme OS=Sus scrofa OX=9823 GN=GGT1 PE=2 SV=1	PF07733//PF01019	Bacterial DNA polymerase III alpha subunit//Gamma-glutamyltranspeptidase	GO:0019530//GO:0006691//GO:0006749//GO:0006260//GO:0006693	taurine metabolic process//leukotriene metabolic process//glutathione metabolic process//DNA replication//prostaglandin metabolic process	GO:0008408//GO:0003840	3'-5' exonuclease activity//gamma-glutamyltransferase activity	--	--	KOG2410	Gamma-glutamyltransferase
83	Cluster-12164.0	710	--	--	--	--	--	XM_016808767.1	XM_016808767	137	2.82e-63	PREDICTED: Acyrthosiphon pisum protein alan shepard (LOC100166583), transcript variant X9, mRNA	--	--	--	--	--	--	--	--	--	--	--	--	--	--	--	--	--	--
84	Cluster-11959.0	503	10803334	XP_022168057.1	366	1.3e-32	zwei Ig domain protein zig-1-like [Myzus persicae]	--	--	--	--	--	--	--	--	--	Q8NDA2	138	1.4e-07	Hemicentin-2 OS=Homo sapiens OX=9606 GN=HMCN2 PE=2 SV=3	PF05790//PF13895//PF16906//PF07663	Immunoglobulin C2-set domain//Immunoglobulin domain//Ribosomal proteins L26 eukaryotic, L24P archaeal//Sorbitol phosphotransferase enzyme II C-terminus	GO:0009401//GO:0008643//GO:0006412//GO:0007155//GO:0042254	phosphoenolpyruvate-dependent sugar phosphotransferase system//carbohydrate transport//translation//cell adhesion//ribosome biogenesis	GO:0008982//GO:0005515//GO:0003735	protein-N(PI)-phosphohistidine-sugar phosphotransferase activity//protein binding//structural constituent of ribosome	GO:0016021//GO:0005840//GO:0009357//GO:0015934	integral component of membrane//ribosome//protein-N(PI)-phosphohistidine-sugar phosphotransferase complex//large ribosomal subunit	--	--
85	Cluster-10440.0	1619	1167431	XP_001945928.1	1411	2.8e-153	PREDICTED: mediator of RNA polymerase II transcription subunit 27 [Acyrthosiphon pisum]	XM_001945893.3	XM_001945893	1226	0	PREDICTED: Acyrthosiphon pisum mediator of RNA polymerase II transcription subunit 27 (LOC100167712), mRNA	K15170	MED27	mediator of RNA polymerase II transcription subunit 27	http://www.genome.jp/dbget-bin/www_bget?ko:K15170	Q171Y8	587	3.8e-59	Mediator of RNA polymerase II transcription subunit 27 OS=Aedes aegypti OX=7159 GN=MED27 PE=3 SV=1	--	--	--	--	--	--	--	--	--	--
86	Cluster-4343.0	4272	11751714	PNF29318.1	3547	0	Importin-5 [Cryptotermes secundus]	XM_008185604.2	XM_008185604	3823	0	PREDICTED: Acyrthosiphon pisum importin-5 (LOC100165969), mRNA	--	--	--	--	O00410	2862	0	Importin-5 OS=Homo sapiens OX=9606 GN=IPO5 PE=1 SV=4	PF03810//PF02985//PF07813	Importin-beta N-terminal domain//HEAT repeat//LTXXQ motif family protein	GO:0006886	intracellular protein transport	GO:0005515//GO:0008536	protein binding//Ran GTPase binding	GO:0042597	periplasmic space	KOG2171	Karyopherin (importin) beta 3
87	Cluster-4370.0	519	--	--	--	--	--	XM_001949153.4	XM_001949153	208	6.89e-103	PREDICTED: Acyrthosiphon pisum la-related protein 7 (LOC100164253), mRNA	--	--	--	--	--	--	--	--	--	--	--	--	--	--	--	--	--	--
88	Cluster-9382.0	2716	9731503	XP_018902952.1	1337	1.8e-144	PREDICTED: zinc finger protein 665-like [Bemisia tabaci]	XM_001943862.4	XM_001943862	2465	0	PREDICTED: Acyrthosiphon pisum zinc finger protein 883 (LOC100167972), mRNA	K09228	KRAB	KRAB domain-containing zinc finger protein	http://www.genome.jp/dbget-bin/www_bget?ko:K09228	A8MXY4	1057	2e-113	Zinc finger protein 99 OS=Homo sapiens OX=9606 GN=ZNF99 PE=2 SV=3	PF06160//PF02305//PF16622//PF13912//PF13465//PF05191//PF00096//PF01566	Septation ring formation regulator, EzrA//Capsid protein (F protein)//zinc-finger C2H2-type//C2H2-type zinc finger//Zinc-finger double domain//Adenylate kinase, active site lid//Zinc finger, C2H2 type//Natural resistance-associated macrophage protein	GO:0006810//GO:0006144//GO:0000921//GO:0046034	transport//purine nucleobase metabolic process//septin ring assembly//ATP metabolic process	GO:0005215//GO:0004017//GO:0005198//GO:0046872	transporter activity//adenylate kinase activity//structural molecule activity//metal ion binding	GO:0016020//GO:0005940//GO:0019028//GO:0016021	membrane//septin ring//viral capsid//integral component of membrane	--	--
89	Cluster-2492.0	1276	10793430	XP_022163232.1	294	7.5e-24	uncharacterized protein LOC111028781 [Myzus persicae]	--	--	--	--	--	--	--	--	--	--	--	--	--	PF05485//PF06305//PF04977//PF05817	THAP domain//Protein of unknown function (DUF1049)//Septum formation initiator//Oligosaccharyltransferase subunit Ribophorin II	GO:0007049//GO:0006487	cell cycle//protein N-linked glycosylation	GO:0003676	nucleic acid binding	GO:0005887//GO:0016021//GO:0008250	integral component of plasma membrane//integral component of membrane//oligosaccharyltransferase complex	--	--
90	Cluster-10338.0	2522	1168333	XP_001948539.1	1110	3.5e-118	PREDICTED: uncharacterized protein LOC100165386 [Acyrthosiphon pisum]	XM_001948504.4	XM_001948504	1017	0	PREDICTED: Acyrthosiphon pisum uncharacterized LOC100165386 (LOC100165386), mRNA	--	--	--	--	--	--	--	--	PF02839//PF04130	Carbohydrate binding domain//Spc97 / Spc98 family	GO:0090063//GO:0005975//GO:0000226	positive regulation of microtubule nucleation//carbohydrate metabolic process//microtubule cytoskeleton organization	GO:0030246//GO:0004553	carbohydrate binding//hydrolase activity, hydrolyzing O-glycosyl compounds	GO:0000922//GO:0005576//GO:0005815	spindle pole//extracellular region//microtubule organizing center	--	--
91	Cluster-11839.0	391	--	--	--	--	--	--	--	--	--	--	--	--	--	--	--	--	--	--	--	--	--	--	--	--	--	--	--	--
92	Cluster-2604.0	1003	--	--	--	--	--	--	--	--	--	--	--	--	--	--	--	--	--	--	--	--	--	--	--	--	--	--	--	--
93	Cluster-598.0	378	--	--	--	--	--	XR_001680145.1	XR_001680145	169	2.35e-81	PREDICTED: Acyrthosiphon pisum uncharacterized LOC107884807 (LOC107884807), ncRNA	--	--	--	--	--	--	--	--	--	--	--	--	--	--	--	--	--	--
94	Cluster-6181.0	560	--	--	--	--	--	--	--	--	--	--	--	--	--	--	--	--	--	--	--	--	--	--	--	--	--	--	--	--
95	Cluster-684.0	421	10808326	XP_022173544.1	683	1.9e-69	LOW QUALITY PROTEIN: DNA ..cytosine-5..-methyltransferase 1-like [Myzus persicae]	XM_015523831.1	XM_015523831	320	3.02e-165	PREDICTED: Diuraphis noxia DNA (cytosine-5)-methyltransferase PliMCI-like (LOC107173325), mRNA	--	--	--	--	--	--	--	--	--	--	--	--	--	--	--	--	--	--
96	Cluster-9053.0	713	--	--	--	--	--	--	--	--	--	--	--	--	--	--	--	--	--	--	--	--	--	--	--	--	--	--	--	--
97	Cluster-1337.0	2453	1168398	XP_001947957.1	2175	1.1e-241	PREDICTED: protein 60A [Acyrthosiphon pisum]	XM_001947922.4	XM_001947922	1439	0	PREDICTED: Acyrthosiphon pisum protein 60A (LOC100159372), mRNA	K16621	BMP7	bone morphogenetic protein 7	http://www.genome.jp/dbget-bin/www_bget?ko:K16621	Q24735	803	5.2e-84	Protein 60A OS=Drosophila virilis OX=7244 GN=gbb PE=3 SV=1	PF00019//PF00688	Transforming growth factor beta like domain//TGF-beta propeptide	GO:0008283//GO:0040007//GO:0007165	cell proliferation//growth//signal transduction	GO:0008083	growth factor activity	--	--	--	--
98	Cluster-2964.0	523	--	--	--	--	--	--	--	--	--	--	--	--	--	--	--	--	--	--	--	--	--	--	--	--	--	--	--	--
99	Cluster-5203.0	386	--	--	--	--	--	--	--	--	--	--	--	--	--	--	--	--	--	--	--	--	--	--	--	--	--	--	--	--
100	Cluster-10142.0	374	--	--	--	--	--	--	--	--	--	--	--	--	--	--	--	--	--	--	--	--	--	--	--	--	--	--	--	--
101	Cluster-10348.1	548	2476949	XP_003245046.1	974	4.5e-103	PREDICTED: ectopic P granules protein 5 homolog [Acyrthosiphon pisum]	XM_003244998.3	XM_003244998	518	0	PREDICTED: Acyrthosiphon pisum ectopic P granules protein 5 homolog (LOC100159547), mRNA	--	--	--	--	Q0IEK6	130	1.3e-06	Ectopic P granules protein 5 homolog OS=Aedes aegypti OX=7159 GN=AAEL009648 PE=3 SV=1	--	--	--	--	--	--	--	--	--	--
102	Cluster-9637.0	3259	4415723	XP_008184318.1	3859	0	PREDICTED: sodium- and chloride-dependent GABA transporter ine isoform X2 [Acyrthosiphon pisum]	XM_008186095.2	XM_008186095	2569	0	PREDICTED: Acyrthosiphon pisum sodium- and chloride-dependent GABA transporter ine (LOC100168077), transcript variant X1, mRNA	K05039	SLC6A6S	solute carrier family 6 (neurotransmitter transporter, GABA) member 6/8/11/12/13	http://www.genome.jp/dbget-bin/www_bget?ko:K05039	Q9VR07	1534	1.2e-168	Sodium- and chloride-dependent GABA transporter ine OS=Drosophila melanogaster OX=7227 GN=ine PE=1 SV=1	PF00209	Sodium:neurotransmitter symporter family	GO:0006812//GO:0006836	cation transport//neurotransmitter transport	GO:0005328	neurotransmitter:sodium symporter activity	GO:0016021	integral component of membrane	--	--
103	Cluster-3612.0	1812	--	--	--	--	--	XM_001945277.4	XM_001945277	966	0	PREDICTED: Acyrthosiphon pisum NADPH--cytochrome P450 reductase (LOC100160284), mRNA	--	--	--	--	--	--	--	--	--	--	--	--	--	--	--	--	--	--
104	Cluster-2263.0	1673	4412556	XP_008179028.1	2493	1e-278	PREDICTED: DNA-directed RNA polymerase III subunit RPC3 [Acyrthosiphon pisum]	XM_008180806.2	XM_008180806	1541	0	PREDICTED: Acyrthosiphon pisum DNA-directed RNA polymerase III subunit RPC3 (LOC103308081), mRNA	--	--	--	--	Q9D483	369	7.4e-34	DNA-directed RNA polymerase III subunit RPC3 OS=Mus musculus OX=10090 GN=Polr3c PE=1 SV=1	PF05645	RNA polymerase III subunit RPC82	GO:0006144//GO:0006351//GO:0006206	purine nucleobase metabolic process//transcription, DNA-templated//pyrimidine nucleobase metabolic process	GO:0003899//GO:0003677	DNA-directed RNA polymerase activity//DNA binding	GO:0005730	nucleolus	--	--
105	Cluster-12701.0	362	--	--	--	--	--	--	--	--	--	--	--	--	--	--	--	--	--	--	--	--	--	--	--	--	--	--	--	--
106	Cluster-3682.0	1880	1167824	XP_001946044.1	2351	3.3e-262	PREDICTED: uncharacterized protein LOC100167646 [Acyrthosiphon pisum]	XM_001946009.4	XM_001946009	1611	0	PREDICTED: Acyrthosiphon pisum uncharacterized LOC100167646 (LOC100167646), mRNA	--	--	--	--	--	--	--	--	--	--	--	--	--	--	--	--	--	--
107	Cluster-12109.0	549	11659221	XP_023292983.1	636	7.1e-64	uncharacterized protein LOC111676295 [Lucilia cuprina]	CP013031.1	CP013031	549	0	Escherichia coli strain H1827/12, complete genome	K18798	AFG1, LACE1	protein AFG1	http://www.genome.jp/dbget-bin/www_bget?ko:K18798	P64613	943	6.7e-101	Cell division protein ZapE OS=Escherichia coli O157:H7 OX=83334 GN=zapE PE=3 SV=1	PF04851//PF03969	Type III restriction enzyme, res subunit//AFG1-like ATPase	--	--	GO:0016787//GO:0003677//GO:0005524	hydrolase activity//DNA binding//ATP binding	--	--	KOG2383	Predicted ATPase
108	Cluster-6407.0	466	--	--	--	--	--	XM_001950240.4	XM_001950240	401	0	PREDICTED: Acyrthosiphon pisum WD repeat domain phosphoinositide-interacting protein 2-like (LOC100165258), transcript variant X1, mRNA	--	--	--	--	--	--	--	--	--	--	--	--	--	--	--	--	--	--
109	Cluster-11530.1	368	--	--	--	--	--	--	--	--	--	--	--	--	--	--	--	--	--	--	--	--	--	--	--	--	--	--	--	--
110	Cluster-2332.0	394	--	--	--	--	--	--	--	--	--	--	--	--	--	--	--	--	--	--	--	--	--	--	--	--	--	--	--	--
111	Cluster-335.0	636	8329359	XP_016657665.1	851	9.6e-89	PREDICTED: ubiquinone biosynthesis protein COQ9, mitochondrial-like isoform X1 [Acyrthosiphon pisum]	XM_016802176.1	XM_016802176	537	0	PREDICTED: Acyrthosiphon pisum ubiquinone biosynthesis protein COQ9, mitochondrial-like (LOC100160345), transcript variant X1, mRNA	--	--	--	--	--	--	--	--	--	--	--	--	--	--	--	--	--	--
112	Cluster-7955.1	1546	2478863	XP_003247913.1	1457	1.3e-158	PREDICTED: ribonuclease 3 [Acyrthosiphon pisum]	XM_003247865.3	XM_003247865	1087	0	PREDICTED: Acyrthosiphon pisum ribonuclease 3 (LOC100160623), mRNA	K03685	rnc, DROSHA, RNT1	ribonuclease III	http://www.genome.jp/dbget-bin/www_bget?ko:K03685	Q9NRR4	760	3.1e-79	Ribonuclease 3 OS=Homo sapiens OX=9606 GN=DROSHA PE=1 SV=2	PF14622//PF00636//PF02601	Ribonuclease-III-like//Ribonuclease III domain//Exonuclease VII, large subunit	GO:0006308//GO:0051252//GO:0006396	DNA catabolic process//regulation of RNA metabolic process//RNA processing	GO:0003723//GO:0008855//GO:0004525	RNA binding//exodeoxyribonuclease VII activity//ribonuclease III activity	GO:0009318	exodeoxyribonuclease VII complex	KOG0701	dsRNA-specific nuclease Dicer and related ribonucleases
113	Cluster-7955.0	563	10794722	XP_022178618.1	991	5e-105	ribonuclease 3 [Myzus persicae]	XM_003247865.3	XM_003247865	539	0	PREDICTED: Acyrthosiphon pisum ribonuclease 3 (LOC100160623), mRNA	K03685	rnc, DROSHA, RNT1	ribonuclease III	http://www.genome.jp/dbget-bin/www_bget?ko:K03685	Q5HZJ0	700	1e-72	Ribonuclease 3 OS=Mus musculus OX=10090 GN=Drosha PE=1 SV=1	PF14622//PF00636	Ribonuclease-III-like//Ribonuclease III domain	GO:0051252//GO:0006396	regulation of RNA metabolic process//RNA processing	GO:0003723//GO:0004525	RNA binding//ribonuclease III activity	--	--	KOG1817	Ribonuclease
114	Cluster-11548.2	1375	1595858	BAH72419.1	1104	9.6e-118	ACYPI009545 [Acyrthosiphon pisum]	AK342365.1	AK342365	966	0	Acyrthosiphon pisum ACYPI009545 mRNA, clone: 376C15, complete cds, full-insert cDNA sequence based on the ESTs (5'-EST:FF305506, 3'-EST:FF306977)	--	--	--	--	D2WKD9	485	2.2e-47	Farnesol dehydrogenase OS=Aedes aegypti OX=7159 GN=SDR-1 PE=1 SV=2	PF01073//PF01370//PF00106	3-beta hydroxysteroid dehydrogenase/isomerase family//NAD dependent epimerase/dehydratase family//short chain dehydrogenase	GO:0008209//GO:0008152//GO:0008210//GO:0006694//GO:0008207//GO:0055114	androgen metabolic process//metabolic process//estrogen metabolic process//steroid biosynthetic process//C21-steroid hormone metabolic process//oxidation-reduction process	GO:0003854//GO:0016616//GO:0050662//GO:0003824//GO:0016491	3-beta-hydroxy-delta5-steroid dehydrogenase activity//oxidoreductase activity, acting on the CH-OH group of donors, NAD or NADP as acceptor//coenzyme binding//catalytic activity//oxidoreductase activity	--	--	--	--
115	Cluster-11423.0	1067	10812792	XP_022178473.1	170	1.5e-09	uncharacterized protein LOC111039319, partial [Myzus persicae]	XM_016802245.1	XM_016802245	208	1.47e-102	PREDICTED: Acyrthosiphon pisum uncharacterized LOC107882983 (LOC107882983), mRNA	--	--	--	--	--	--	--	--	--	--	--	--	--	--	--	--	--	--
116	Cluster-2093.0	1227	1168743	XP_001946684.1	856	4.9e-89	PREDICTED: MORN repeat-containing protein 4 isoform X2 [Acyrthosiphon pisum]	XM_001946649.4	XM_001946649	492	0	PREDICTED: Acyrthosiphon pisum MORN repeat-containing protein 4 (LOC100166646), transcript variant X2, mRNA	--	--	--	--	Q9VN91	560	3.9e-56	MORN repeat-containing protein 4 homolog OS=Drosophila melanogaster OX=7227 GN=rtp PE=1 SV=1	--	--	--	--	--	--	--	--	KOG0231	Junctional membrane complex protein Junctophilin and related MORN repeat proteins
117	Cluster-10073.0	381	--	--	--	--	--	--	--	--	--	--	--	--	--	--	--	--	--	--	--	--	--	--	--	--	--	--	--	--
118	Cluster-11046.0	995	8333595	XP_016656177.1	493	4.9e-47	PREDICTED: uncharacterized protein LOC100165564 isoform X2 [Acyrthosiphon pisum]	XM_016800688.1	XM_016800688	250	6.12e-126	PREDICTED: Acyrthosiphon pisum uncharacterized LOC100165564 (LOC100165564), transcript variant X2, mRNA	--	--	--	--	Q59X49	138	2.7e-07	Stress protein DDR48 OS=Candida albicans (strain SC5314 / ATCC MYA-2876) OX=237561 GN=DDR48 PE=1 SV=1	--	--	--	--	--	--	--	--	--	--
119	Cluster-3959.478	2454	10812981	XP_022178682.1	2931	0	protein Skeletor, isoforms B..C [Myzus persicae]	XM_008182419.1	XM_008182419	1453	0	PREDICTED: Acyrthosiphon pisum protein Skeletor, isoforms B/C (LOC100160004), partial mRNA	--	--	--	--	Q9VGY6	723	9.7e-75	Protein Skeletor, isoforms B/C OS=Drosophila melanogaster OX=7227 GN=Skeletor PE=1 SV=2	PF01477	PLAT/LH2 domain	--	--	GO:0005515	protein binding	--	--	KOG4731	Protein predicted to be involved in spindle matrix formation, contains DM13, DoH, and DOMON domains
120	Cluster-3959.479	4846	2474910	XP_003241713.1	358	1.1e-30	PREDICTED: uncharacterized protein LOC100575717 [Acyrthosiphon pisum]	XM_003241665.3	XM_003241665	219	5.24e-108	PREDICTED: Acyrthosiphon pisum uncharacterized LOC100575717 (LOC100575717), mRNA	--	--	--	--	--	--	--	--	--	--	--	--	--	--	--	--	--	--
121	Cluster-3959.476	4391	10814448	XP_022180295.1	1720	1.1e-188	serine-threonine kinase receptor-associated protein [Myzus persicae]	XM_001950314.4	XM_001950314	1538	0	PREDICTED: Acyrthosiphon pisum serine-threonine kinase receptor-associated protein-like (LOC100161090), mRNA	K13137	STRAP, UNRIP	serine-threonine kinase receptor-associated protein	http://www.genome.jp/dbget-bin/www_bget?ko:K13137	Q9Z1Z2	1042	1.8e-111	Serine-threonine kinase receptor-associated protein OS=Mus musculus OX=10090 GN=Strap PE=1 SV=2	PF00400//PF00579//PF01479//PF06433	WD domain, G-beta repeat//tRNA synthetases class I (W and Y)//S4 domain//Methylamine dehydrogenase heavy chain (MADH)	GO:0055114//GO:0006418//GO:0015947	oxidation-reduction process//tRNA aminoacylation for protein translation//methane metabolic process	GO:0000166//GO:0030058//GO:0003723//GO:0004812//GO:0005515//GO:0005524	nucleotide binding//amine dehydrogenase activity//RNA binding//aminoacyl-tRNA ligase activity//protein binding//ATP binding	GO:0042597	periplasmic space	KOG2623	Tyrosyl-tRNA synthetase
122	Cluster-3959.477	1942	1167119	XP_001950741.1	1590	6e-174	PREDICTED: uncharacterized protein LOC100164964 isoform X1 [Acyrthosiphon pisum]	XM_001950706.4	XM_001950706	1177	0	PREDICTED: Acyrthosiphon pisum pyridoxine-5'-phosphate oxidase-like (LOC100164964), transcript variant X1, mRNA	K19269	PGP, PGLP	phosphoglycolate phosphatase	http://www.genome.jp/dbget-bin/www_bget?ko:K19269	Q5F4B1	606	2.8e-61	Glycerol-3-phosphate phosphatase OS=Gallus gallus OX=9031 GN=PGP PE=2 SV=1	--	--	--	--	--	--	--	--	KOG2882	p-Nitrophenyl phosphatase
123	Cluster-3959.474	515	4417710	XP_008187704.1	398	2.6e-36	PREDICTED: ribonucleoside-diphosphate reductase large subunit [Acyrthosiphon pisum]	XM_001942675.4	XM_001942675	365	0	PREDICTED: Acyrthosiphon pisum ribonucleoside-diphosphate reductase large subunit (LOC100162830), mRNA	K10807	RRM1	ribonucleoside-diphosphate reductase subunit M1	http://www.genome.jp/dbget-bin/www_bget?ko:K10807	P23921	219	5.6e-17	Ribonucleoside-diphosphate reductase large subunit OS=Homo sapiens OX=9606 GN=RRM1 PE=1 SV=1	--	--	--	--	--	--	--	--	KOG1112	Ribonucleotide reductase, alpha subunit
124	Cluster-3959.475	3592	8347060	XP_016659898.1	2127	6e-236	PREDICTED: uncharacterized protein LOC100161584 isoform X2 [Acyrthosiphon pisum]	XR_510735.2	XR_510735	1588	0	PREDICTED: Acyrthosiphon pisum uncharacterized LOC100161584 (LOC100161584), transcript variant X2, misc_RNA	K12868	SYF2	pre-mRNA-splicing factor SYF2	http://www.genome.jp/dbget-bin/www_bget?ko:K12868	Q9V5Q4	688	1.6e-70	Pre-mRNA-splicing factor Syf2 OS=Drosophila melanogaster OX=7227 GN=Syf2 PE=2 SV=1	PF03079//PF02845//PF00641//PF16685//PF02482	ARD/ARD' family//CUE domain//Zn-finger in Ran binding protein and others//zinc RING finger of MSL2//Sigma 54 modulation protein / S30EA ribosomal protein	GO:0044238//GO:0055114	primary metabolic process//oxidation-reduction process	GO:0061630//GO:0008270//GO:0005515//GO:0010309	ubiquitin protein ligase activity//zinc ion binding//protein binding//acireductone dioxygenase [iron(II)-requiring] activity	--	--	KOG2609	Cyclin D-interacting protein GCIP
125	Cluster-3959.472	827	10811761	XP_022177346.1	431	6.3e-40	mitochondrial import inner membrane translocase subunit Tim10 [Myzus persicae]	XM_003246988.3	XM_003246988	745	0	PREDICTED: Acyrthosiphon pisum mitochondrial import inner membrane translocase subunit Tim10 (LOC100571497), mRNA >ref|XM_016807472.1| PREDICTED: Acyrthosiphon pisum uncharacterized LOC107884723 (LOC107884723), mRNA	K17778	TIM10	mitochondrial import inner membrane translocase subunit TIM10	http://www.genome.jp/dbget-bin/www_bget?ko:K17778	Q6GQ52	210	1e-15	Mitochondrial import inner membrane translocase subunit Tim10-B OS=Xenopus laevis OX=8355 GN=timm10-b PE=3 SV=1	PF02786	Carbamoyl-phosphate synthase L chain, ATP binding domain	--	--	GO:0005524	ATP binding	--	--	KOG3480	Mitochondrial import inner membrane translocase, subunits TIM10/TIM12
126	Cluster-3959.473	3923	10793560	XP_022164557.1	3976	0	ribonucleoside-diphosphate reductase large subunit-like [Myzus persicae]	XM_008189482.2	XM_008189482	2158	0	PREDICTED: Acyrthosiphon pisum ribonucleoside-diphosphate reductase large subunit (LOC100573189), mRNA	K10807	RRM1	ribonucleoside-diphosphate reductase subunit M1	http://www.genome.jp/dbget-bin/www_bget?ko:K10807	P07742	2789	0	Ribonucleoside-diphosphate reductase large subunit OS=Mus musculus OX=10090 GN=Rrm1 PE=1 SV=2	PF09478//PF02867//PF00830//PF00317	Carbohydrate binding domain CBM49//Ribonucleotide reductase, barrel domain//Ribosomal L28 family//Ribonucleotide reductase, all-alpha domain	GO:0006206//GO:0006260//GO:0055114//GO:0006144//GO:0009186//GO:0042254	pyrimidine nucleobase metabolic process//DNA replication//oxidation-reduction process//purine nucleobase metabolic process//deoxyribonucleoside diphosphate metabolic process//ribosome biogenesis	GO:0030246//GO:0003735//GO:0005524//GO:0004748	carbohydrate binding//structural constituent of ribosome//ATP binding//ribonucleoside-diphosphate reductase activity, thioredoxin disulfide as acceptor	GO:0005840//GO:0005971	ribosome//ribonucleoside-diphosphate reductase complex	KOG1112	Ribonucleotide reductase, alpha subunit
127	Cluster-3959.470	2755	7703773	XP_015376990.1	3777	0	PREDICTED: dnaJ homolog subfamily C member 16 [Diuraphis noxia]	XM_001946186.4	XM_001946186	2575	0	PREDICTED: Acyrthosiphon pisum dnaJ homolog subfamily C member 16 (LOC100168696), mRNA	K09536	DNAJC16	DnaJ homolog subfamily C member 16	http://www.genome.jp/dbget-bin/www_bget?ko:K09536	Q9Y2G8	599	2.6e-60	DnaJ homolog subfamily C member 16 OS=Homo sapiens OX=9606 GN=DNAJC16 PE=2 SV=3	PF13185//PF01741	GAF domain//Large-conductance mechanosensitive channel, MscL	GO:0006810//GO:0006811	transport//ion transport	GO:0005216//GO:0005515	ion channel activity//protein binding	GO:0016021	integral component of membrane	KOG0715	Molecular chaperone (DnaJ superfamily)
128	Cluster-3959.471	461	7692550	XP_015364470.1	824	9.4e-86	PREDICTED: mitogen-activated protein kinase-binding protein 1 [Diuraphis noxia]	XM_001946353.4	XM_001946353	432	0	PREDICTED: Acyrthosiphon pisum WD repeat-containing protein 62 (LOC100166454), mRNA	--	--	--	--	Q6DFF9	480	2.7e-47	Mitogen-activated protein kinase-binding protein 1 OS=Xenopus laevis OX=8355 GN=mapkbp1 PE=2 SV=1	PF00400	WD domain, G-beta repeat	--	--	GO:0005515	protein binding	--	--	KOG0289	mRNA splicing factor
129	Cluster-909.0	389	8344731	XP_016659329.1	608	8.8e-61	PREDICTED: uncharacterized protein LOC100160532 [Acyrthosiphon pisum]	XM_016803840.1	XM_016803840	341	5.88e-177	PREDICTED: Acyrthosiphon pisum uncharacterized LOC100160532 (LOC100160532), mRNA	--	--	--	--	--	--	--	--	--	--	--	--	--	--	--	--	--	--
130	Cluster-6919.0	2370	10802963	XP_022167646.1	314	6.7e-26	uncharacterized protein LOC111031845 [Myzus persicae]	XR_510556.2	XR_510556	1662	0	PREDICTED: Acyrthosiphon pisum uncharacterized LOC100568923 (LOC100568923), ncRNA	--	--	--	--	--	--	--	--	--	--	--	--	--	--	--	--	--	--
131	Cluster-1885.0	2107	10798401	XP_022162570.1	2777	1.8e-311	serine..threonine-protein kinase PAK mbt [Myzus persicae]	XM_001943892.4	XM_001943892	1885	0	PREDICTED: Acyrthosiphon pisum serine/threonine-protein kinase PAK mbt (LOC100163069), mRNA	K05736	PAK7	p21-activated kinase 7	http://www.genome.jp/dbget-bin/www_bget?ko:K05736	Q9VXE5	1410	1.8e-154	Serine/threonine-protein kinase PAK mbt OS=Drosophila melanogaster OX=7227 GN=mbt PE=1 SV=2	PF00069//PF07714//PF06293	Protein kinase domain//Protein tyrosine kinase//Lipopolysaccharide kinase (Kdo/WaaP) family	GO:0006468	protein phosphorylation	GO:0005524//GO:0004672//GO:0016773	ATP binding//protein kinase activity//phosphotransferase activity, alcohol group as acceptor	GO:0016020	membrane	KOG0578	p21-activated serine/threonine protein kinase
132	Cluster-2308.0	1143	--	--	--	--	--	--	--	--	--	--	--	--	--	--	--	--	--	--	--	--	--	--	--	--	--	--	--	--
133	Cluster-3299.0	4634	8348702	XP_016660940.1	6934	0	PREDICTED: uncharacterized protein LOC100160817 [Acyrthosiphon pisum]	XM_016805451.1	XM_016805451	4364	0	PREDICTED: Acyrthosiphon pisum uncharacterized LOC100160817 (LOC100160817), transcript variant X3, mRNA	K08867	WNK, PRKWNK	WNK lysine deficient protein kinase	http://www.genome.jp/dbget-bin/www_bget?ko:K08867	Q9BYP7	1261	7.6e-137	Serine/threonine-protein kinase WNK3 OS=Homo sapiens OX=9606 GN=WNK3 PE=1 SV=3	PF10541//PF07714//PF00069//PF12202	Nuclear envelope localisation domain//Protein tyrosine kinase//Protein kinase domain//Oxidative-stress-responsive kinase 1 C terminal	GO:0016310//GO:0006468//GO:0009069	phosphorylation//protein phosphorylation//serine family amino acid metabolic process	GO:0004674//GO:0005524//GO:0004672	protein serine/threonine kinase activity//ATP binding//protein kinase activity	GO:0016021	integral component of membrane	KOG0584	Serine/threonine protein kinase
134	Cluster-12874.0	2557	10813749	XP_022179531.1	2628	3.4e-294	transmembrane protein 181 [Myzus persicae]	XM_015521738.1	XM_015521738	1365	0	PREDICTED: Diuraphis noxia transmembrane protein 181 (LOC107171492), transcript variant X2, mRNA	--	--	--	--	Q9P2C4	988	1.9e-105	Transmembrane protein 181 OS=Homo sapiens OX=9606 GN=TMEM181 PE=1 SV=2	--	--	--	--	--	--	--	--	--	--
135	Cluster-4739.0	656	--	--	--	--	--	--	--	--	--	--	--	--	--	--	--	--	--	--	--	--	--	--	--	--	--	--	--	--
136	Cluster-1728.0	647	2478053	XP_003246746.1	670	9.5e-68	PREDICTED: uncharacterized protein LOC100573581 [Acyrthosiphon pisum]	XM_003246698.3	XM_003246698	467	0	PREDICTED: Acyrthosiphon pisum uncharacterized LOC100573581 (LOC100573581), mRNA	--	--	--	--	--	--	--	--	--	--	--	--	--	--	--	--	--	--
137	Cluster-2865.0	330	--	--	--	--	--	--	--	--	--	--	--	--	--	--	--	--	--	--	--	--	--	--	--	--	--	--	--	--
138	Cluster-11061.0	348	--	--	--	--	--	XM_008185179.2	XM_008185179	246	3.36e-124	PREDICTED: Acyrthosiphon pisum tyrosine-protein kinase PR2 (LOC100168786), transcript variant X7, mRNA	--	--	--	--	--	--	--	--	--	--	--	--	--	--	--	--	--	--
139	Cluster-6281.0	380	10804202	XP_022169008.1	293	2.9e-24	exonuclease 1 [Myzus persicae]	XM_001942919.4	XM_001942919	185	3.01e-90	PREDICTED: Acyrthosiphon pisum exonuclease 1 (LOC100159481), mRNA	K10746	EXO1	exonuclease 1	http://www.genome.jp/dbget-bin/www_bget?ko:K10746	Q24558	176	4e-12	Exonuclease 1 OS=Drosophila melanogaster OX=7227 GN=tos PE=1 SV=1	PF00752	XPG N-terminal domain	GO:0006281	DNA repair	GO:0004518	nuclease activity	--	--	KOG2518	5'-3' exonuclease
140	Cluster-10565.0	1406	--	--	--	--	--	--	--	--	--	--	--	--	--	--	--	--	--	--	--	--	--	--	--	--	--	--	--	--
141	Cluster-1383.0	417	--	--	--	--	--	XM_001952314.4	XM_001952314	60	1.02e-20	PREDICTED: Acyrthosiphon pisum cytochrome b5-related protein (LOC100165911), mRNA	--	--	--	--	--	--	--	--	--	--	--	--	--	--	--	--	--	--
142	Cluster-2539.0	1348	2475435	XP_001945531.2	1818	1.5e-200	PREDICTED: queuine tRNA-ribosyltransferase subunit QTRTD1 homolog [Acyrthosiphon pisum]	XM_001945496.4	XM_001945496	1162	0	PREDICTED: Acyrthosiphon pisum queuine tRNA-ribosyltransferase subunit QTRTD1 homolog (LOC100167096), mRNA	--	--	--	--	Q16RF5	545	2.3e-54	Queuine tRNA-ribosyltransferase accessory subunit 2 OS=Aedes aegypti OX=7159 GN=AAEL010968 PE=3 SV=1	PF01702	Queuine tRNA-ribosyltransferase	GO:0006400//GO:0008616	tRNA modification//queuosine biosynthetic process	GO:0008479	queuine tRNA-ribosyltransferase activity	--	--	KOG3908	Queuine-tRNA ribosyltransferase
143	Cluster-7880.0	403	--	--	--	--	--	--	--	--	--	--	--	--	--	--	--	--	--	--	--	--	--	--	--	--	--	--	--	--
144	Cluster-9504.0	310	8349818	XP_016662069.1	542	3.2e-53	PREDICTED: GTPase-activating Rap..Ran-GAP domain-like protein 3, partial [Acyrthosiphon pisum]	XM_016806580.1	XM_016806580	286	1.72e-146	PREDICTED: Acyrthosiphon pisum GTPase-activating Rap/Ran-GAP domain-like protein 3 (LOC100160378), partial mRNA	--	--	--	--	Q5ZJY3	346	6.4e-32	GTPase-activating Rap/Ran-GAP domain-like protein 3 OS=Gallus gallus OX=9031 GN=GARNL3 PE=2 SV=1	PF02145	Rap/ran-GAP	GO:0051056	regulation of small GTPase mediated signal transduction	GO:0005096	GTPase activator activity	--	--	KOG3686	Rap1-GTPase-activating protein (Rap1GAP)
145	Cluster-10126.0	5435	2476949	XP_003245046.1	8744	0	PREDICTED: ectopic P granules protein 5 homolog [Acyrthosiphon pisum]	XM_003244998.3	XM_003244998	5037	0	PREDICTED: Acyrthosiphon pisum ectopic P granules protein 5 homolog (LOC100159547), mRNA	--	--	--	--	Q0IEK6	787	8.2e-82	Ectopic P granules protein 5 homolog OS=Aedes aegypti OX=7159 GN=AAEL009648 PE=3 SV=1	PF00831	Ribosomal L29 protein	GO:0042254//GO:0006412	ribosome biogenesis//translation	GO:0003735	structural constituent of ribosome	GO:0005840//GO:0005622	ribosome//intracellular	--	--
146	Cluster-8174.0	1746	7695992	XP_015368275.1	609	3e-60	PREDICTED: biogenesis of lysosome-related organelles complex 1 subunit 1 [Diuraphis noxia]	NM_001162079.1	AK341545	635	0	Acyrthosiphon pisum general control of amino acid synthesis-like (LOC100162818), mRNA >dbj|AK341545.1| Acyrthosiphon pisum ACYPI003941 mRNA, clone: 419M19, complete cds, full-insert cDNA sequence based on the ESTs (5'-EST:FF306769, 3'-EST:FF308655)	--	--	--	--	A1Z9S1	417	2.1e-39	Biogenesis of lysosome-related organelles complex 1 subunit 1 OS=Drosophila melanogaster OX=7227 GN=Blos1 PE=1 SV=2	PF06320	GCN5-like protein 1 (GCN5L1)	--	--	--	--	GO:0031083	BLOC-1 complex	KOG3390	General control of amino-acid synthesis 5-like 1
147	Cluster-7141.0	1676	1168155	XP_001945174.1	1981	2.4e-219	PREDICTED: kaptin isoform X1 [Acyrthosiphon pisum]	XM_001945139.4	XM_001945139	1397	0	PREDICTED: Acyrthosiphon pisum kaptin (LOC100158964), transcript variant X1, mRNA	--	--	--	--	Q8VCX6	416	2.6e-39	KICSTOR complex protein kaptin OS=Mus musculus OX=10090 GN=Kptn PE=2 SV=1	PF00085	Thioredoxin	GO:0045454	cell redox homeostasis	--	--	--	--	--	--
148	Cluster-10564.9	322	--	--	--	--	--	--	--	--	--	--	--	--	--	--	--	--	--	--	--	--	--	--	--	--	--	--	--	--
149	Cluster-8397.0	543	--	--	--	--	--	NM_001171061.1	NM_001171061	297	2.42e-152	Acyrthosiphon pisum chryptochrome 1 (cry1), mRNA	--	--	--	--	--	--	--	--	--	--	--	--	--	--	--	--	--	--
150	Cluster-7672.0	4349	10806348	XP_022171384.1	2217	2.6e-246	serine..threonine-protein kinase PRP4 homolog isoform X3 [Myzus persicae]	XM_016804812.1	XM_016804812	2584	0	PREDICTED: Acyrthosiphon pisum serine/threonine-protein kinase PRP4 homolog (LOC100169542), transcript variant X1, mRNA	K08827	PRPF4B	serine/threonine-protein kinase PRP4	http://www.genome.jp/dbget-bin/www_bget?ko:K08827	Q5RKH1	1404	1.9e-153	Serine/threonine-protein kinase PRP4 homolog OS=Rattus norvegicus OX=10116 GN=Prpf4b PE=1 SV=1	PF07714//PF05445//PF00069	Protein tyrosine kinase//Poxvirus serine/threonine protein kinase//Protein kinase domain	GO:0006468	protein phosphorylation	GO:0004672//GO:0005524	protein kinase activity//ATP binding	--	--	KOG0670	U4/U6-associated splicing factor PRP4
151	Cluster-11001.1	1050	2475725	XP_003243130.1	1150	3.4e-123	PREDICTED: Usher syndrome type-1G protein homolog [Acyrthosiphon pisum]	XM_003243082.3	XM_003243082	850	0	PREDICTED: Acyrthosiphon pisum Usher syndrome type-1G protein homolog (LOC100568632), mRNA	--	--	--	--	--	--	--	--	PF07647//PF00536	SAM domain (Sterile alpha motif)//SAM domain (Sterile alpha motif)	--	--	GO:0005515	protein binding	--	--	--	--
152	Cluster-9627.0	2066	2476214	XP_001950272.2	1818	2.3e-200	PREDICTED: ADP-ribosylation factor GTPase-activating protein 1 isoform X1 [Acyrthosiphon pisum]	XM_001950237.4	XM_001950237	1747	0	PREDICTED: Acyrthosiphon pisum ADP-ribosylation factor GTPase-activating protein 1 (LOC100163643), transcript variant X1, mRNA	K12492	ARFGAP1	ADP-ribosylation factor GTPase-activating protein 1	http://www.genome.jp/dbget-bin/www_bget?ko:K12492	Q9EPJ9	542	8e-54	ADP-ribosylation factor GTPase-activating protein 1 OS=Mus musculus OX=10090 GN=Arfgap1 PE=1 SV=2	PF01780//PF01412	Ribosomal L37ae protein family//Putative GTPase activating protein for Arf	GO:0006412//GO:0042254	translation//ribosome biogenesis	GO:0003735//GO:0005096	structural constituent of ribosome//GTPase activator activity	GO:0005622//GO:0005840	intracellular//ribosome	KOG0704	ADP-ribosylation factor GTPase activator
153	Cluster-11518.0	360	2476557	XP_001950277.2	411	5.7e-38	PREDICTED: leukocyte elastase inhibitor isoform X1 [Acyrthosiphon pisum]	XM_008184829.2	XM_008184829	228	3.54e-114	PREDICTED: Acyrthosiphon pisum leukocyte elastase inhibitor (LOC100163007), transcript variant X2, mRNA	K13963	SERPINB	serpin B	http://www.genome.jp/dbget-bin/www_bget?ko:K13963	Q5R899	157	6.1e-10	Serpin B6 OS=Pongo abelii OX=9601 GN=SERPINB6 PE=2 SV=1	--	--	--	--	--	--	--	--	--	--
154	Cluster-9900.0	1188	10808715	XP_022173981.1	598	3.9e-59	MOB kinase activator-like 2 isoform X2 [Myzus persicae]	XM_008188571.2	XM_008188571	1021	0	PREDICTED: Acyrthosiphon pisum MOB kinase activator-like 2 (LOC100168058), transcript variant X2, mRNA	--	--	--	--	Q20561	209	1.9e-15	Helix-loop-helix protein 13 OS=Caenorhabditis elegans OX=6239 GN=hlh-13 PE=2 SV=1	PF00010	Helix-loop-helix DNA-binding domain	--	--	GO:0046983	protein dimerization activity	--	--	KOG4029	Transcription factor HAND2/Transcription factor TAL1/TAL2/LYL1
155	Cluster-9180.0	2205	8340609	XP_016658199.1	2574	5.4e-288	PREDICTED: uncharacterized protein LOC107883167 isoform X1 [Acyrthosiphon pisum]	XM_016802710.1	XM_016802710	1758	0	PREDICTED: Acyrthosiphon pisum uncharacterized LOC107883167 (LOC107883167), transcript variant X1, mRNA	--	--	--	--	--	--	--	--	PF00379	Insect cuticle protein	--	--	GO:0042302	structural constituent of cuticle	--	--	--	--
156	Cluster-6075.0	697	8349279	XP_016661529.1	706	6.9e-72	PREDICTED: 39S ribosomal protein L14, mitochondrial-like isoform X1 [Acyrthosiphon pisum]	NM_001162669.2	NM_001162669	526	0	Acyrthosiphon pisum 39S ribosomal protein L14, mitochondrial-like (LOC100162301), mRNA	K02874	RP-L14, MRPL14, rplN	large subunit ribosomal protein L14	http://www.genome.jp/dbget-bin/www_bget?ko:K02874	Q1JQ99	344	2.5e-31	39S ribosomal protein L14, mitochondrial OS=Bos taurus OX=9913 GN=MRPL14 PE=1 SV=1	PF00238	Ribosomal protein L14p/L23e	GO:0006412//GO:0042254	translation//ribosome biogenesis	GO:0003735	structural constituent of ribosome	GO:0005840	ribosome	KOG3441	Mitochondrial ribosomal protein L14
157	Cluster-9788.0	2145	8336747	XP_016657118.1	2327	2.3e-259	PREDICTED: probable cytochrome P450 6a14 [Acyrthosiphon pisum]	XM_001944564.4	XM_001944564	1794	0	PREDICTED: Acyrthosiphon pisum probable cytochrome P450 6a14 (LOC100162594), transcript variant X1, mRNA	K14999	CYP6	cytochrome P450, family 6	http://www.genome.jp/dbget-bin/www_bget?ko:K14999	Q9V4U7	918	2.1e-97	Probable cytochrome P450 6a14 OS=Drosophila melanogaster OX=7227 GN=Cyp6a14 PE=3 SV=2	PF00020//PF00067	TNFR/NGFR cysteine-rich region//Cytochrome P450	GO:0055114	oxidation-reduction process	GO:0005506//GO:0005515//GO:0016705//GO:0020037	iron ion binding//protein binding//oxidoreductase activity, acting on paired donors, with incorporation or reduction of molecular oxygen//heme binding	--	--	--	--
158	Cluster-4797.0	769	--	--	--	--	--	--	--	--	--	--	--	--	--	--	--	--	--	--	--	--	--	--	--	--	--	--	--	--
159	Cluster-4797.1	337	--	--	--	--	--	--	--	--	--	--	--	--	--	--	--	--	--	--	--	--	--	--	--	--	--	--	--	--
160	Cluster-12164.1	2941	4418185	XP_008188482.1	1936	6.9e-214	PREDICTED: protein alan shepard isoform X3 [Acyrthosiphon pisum]	XM_008190260.2	XM_008190260	2657	0	PREDICTED: Acyrthosiphon pisum protein alan shepard (LOC100166583), transcript variant X5, mRNA	--	--	--	--	B3M3R5	861	1.2e-90	Protein alan shepard OS=Drosophila ananassae OX=7217 GN=shep PE=3 SV=2	PF00076//PF08299	RNA recognition motif. (a.k.a. RRM, RBD, or RNP domain)//Bacterial dnaA protein helix-turn-helix	GO:0006275//GO:0006270	regulation of DNA replication//DNA replication initiation	GO:0043565//GO:0003676//GO:0005524	sequence-specific DNA binding//nucleic acid binding//ATP binding	--	--	KOG4733	FOG: RRM domain
161	Cluster-10703.0	1979	8342399	XP_016658689.1	1569	1.7e-171	PREDICTED: uncharacterized protein LOC100160605 [Acyrthosiphon pisum]	XM_016803200.1	XM_016803200	1222	0	PREDICTED: Acyrthosiphon pisum uncharacterized LOC100160605 (LOC100160605), mRNA	--	--	--	--	--	--	--	--	PF03211//PF04666	Pectate lyase//N-Acetylglucosaminyltransferase-IV (GnT-IV) conserved region	GO:0005975	carbohydrate metabolic process	GO:0030570//GO:0016758	pectate lyase activity//transferase activity, transferring hexosyl groups	GO:0005576//GO:0016020	extracellular region//membrane	--	--
162	Cluster-1752.0	474	2475602	XP_003242928.1	821	2.2e-85	PREDICTED: nucleoporin NUP188 homolog [Acyrthosiphon pisum]	XM_003242880.3	XM_003242880	437	0	PREDICTED: Acyrthosiphon pisum nucleoporin NUP188 homolog (LOC100569146), mRNA	--	--	--	--	--	--	--	--	--	--	--	--	--	--	--	--	--	--
163	Cluster-12902.0	1644	1167580	XP_001950335.1	831	5.2e-86	PREDICTED: trans-Golgi network integral membrane protein 2 [Acyrthosiphon pisum]	XM_001950300.4	XM_001950300	1395	0	PREDICTED: Acyrthosiphon pisum trans-Golgi network integral membrane protein 2 (LOC100161810), mRNA	--	--	--	--	--	--	--	--	--	--	--	--	--	--	--	--	--	--
164	Cluster-3959.784	590	--	--	--	--	--	XM_008180317.2	XM_008180317	357	0	PREDICTED: Acyrthosiphon pisum mitochondrial fission 1 protein (Fis1), transcript variant X1, mRNA	--	--	--	--	--	--	--	--	--	--	--	--	--	--	--	--	--	--
165	Cluster-3959.785	1662	9739244	XP_018916298.1	1004	4.6e-106	PREDICTED: electron transfer flavoprotein subunit beta [Bemisia tabaci]	XM_008183411.2	XM_008183411	1060	0	PREDICTED: Acyrthosiphon pisum electron transfer flavoprotein subunit beta (LOC103308991), mRNA	K03521	fixA, etfB	electron transfer flavoprotein beta subunit	http://www.genome.jp/dbget-bin/www_bget?ko:K03521	Q68FU3	835	6.8e-88	Electron transfer flavoprotein subunit beta OS=Rattus norvegicus OX=10116 GN=Etfb PE=1 SV=3	--	--	--	--	--	--	--	--	KOG3180	Electron transfer flavoprotein, beta subunit
166	Cluster-3959.786	5652	2476143	XP_001944426.2	5278	0	PREDICTED: rho GTPase-activating protein 100F isoform X1 [Acyrthosiphon pisum]	XM_001944391.4	XM_001944391	4122	0	PREDICTED: Acyrthosiphon pisum rho GTPase-activating protein 100F (LOC100166529), transcript variant X1, mRNA	--	--	--	--	Q9V9S7	2091	5.3e-233	Rho GTPase-activating protein 100F OS=Drosophila melanogaster OX=7227 GN=RhoGAP100F PE=1 SV=2	PF00620//PF00595//PF00168	RhoGAP domain//PDZ domain (Also known as DHR or GLGF)//C2 domain	GO:0007165	signal transduction	GO:0005515	protein binding	--	--	--	--
167	Cluster-3959.787	1681	10804498	XP_022169338.1	782	2.6e-80	histone deacetylase complex subunit SAP18 isoform X2 [Myzus persicae]	XM_001951856.4	XM_001951856	463	0	PREDICTED: Acyrthosiphon pisum histone deacetylase complex subunit SAP18 (LOC100163097), mRNA	K14324	SAP18	histone deacetylase complex subunit SAP18	http://www.genome.jp/dbget-bin/www_bget?ko:K14324	Q9VEX9	404	6.5e-38	Histone deacetylase complex subunit SAP18 OS=Drosophila melanogaster OX=7227 GN=Bin1 PE=1 SV=1	--	--	--	--	--	--	--	--	KOG3391	Transcriptional co-repressor component
168	Cluster-3959.780	3993	8334140	XP_016656330.1	3574	0	PREDICTED: CTL-like protein 2 [Acyrthosiphon pisum]	XM_003241453.3	XM_003241453	3165	0	PREDICTED: Acyrthosiphon pisum CTL-like protein 2 (LOC100166472), transcript variant X1, mRNA	K15377	SLC44A2_4_5	solute carrier family 44 (choline transporter-like protein), member 2/4/5	http://www.genome.jp/dbget-bin/www_bget?ko:K15377	Q7SYC9	1043	1.2e-111	Choline transporter-like protein 2 OS=Danio rerio OX=7955 GN=slc44a2 PE=2 SV=1	--	--	--	--	--	--	--	--	KOG1362	Choline transporter-like protein
169	Cluster-1311.0	1498	10140973	XP_020277980.1	993	7.8e-105	rhomboid-related protein 3-like isoform X4 [Pseudomyrmex gracilis]	XM_001947376.4	XM_001947376	1212	0	PREDICTED: Acyrthosiphon pisum rhomboid-related protein 2 (LOC100162200), mRNA	K02857	RHBDL1_2_3	rhomboid-related protein 1/2/3	http://www.genome.jp/dbget-bin/www_bget?ko:K02857	P58872	501	3.3e-49	Rhomboid-related protein 3 OS=Homo sapiens OX=9606 GN=RHBDL3 PE=2 SV=1	PF01694//PF13833//PF13405//PF10591//PF13202//PF00036//PF13499	Rhomboid family//EF-hand domain pair//EF-hand domain//Secreted protein acidic and rich in cysteine Ca binding region//EF hand//EF hand//EF-hand domain pair	GO:0007165	signal transduction	GO:0004252//GO:0005509	serine-type endopeptidase activity//calcium ion binding	GO:0005578//GO:0016021	proteinaceous extracellular matrix//integral component of membrane	KOG2289	Rhomboid family proteins
170	Cluster-3698.1	1072	--	--	--	--	--	--	--	--	--	--	--	--	--	--	--	--	--	--	--	--	--	--	--	--	--	--	--	--
171	Cluster-3959.783	3708	10807976	XP_022173166.1	2033	4.9e-225	protein krasavietz isoform X1 [Myzus persicae]	XM_008183768.2	XM_008183768	1745	0	PREDICTED: Acyrthosiphon pisum protein krasavietz (LOC100165540), mRNA	--	--	--	--	Q9VNE2	1452	4.3e-159	Protein krasavietz OS=Drosophila melanogaster OX=7227 GN=kra PE=1 SV=1	PF00003//PF02020//PF01607	7 transmembrane sweet-taste receptor of 3 GCPR//eIF4-gamma/eIF5/eIF2-epsilon//Chitin binding Peritrophin-A domain	GO:0007186//GO:0006030	G-protein coupled receptor signaling pathway//chitin metabolic process	GO:0005515//GO:0004930//GO:0008061	protein binding//G-protein coupled receptor activity//chitin binding	GO:0016021//GO:0005576	integral component of membrane//extracellular region	KOG2297	Predicted translation factor, contains W2 domain
172	Cluster-7895.0	3675	2475783	XP_003243252.1	2690	3.2e-301	PREDICTED: uncharacterized protein LOC100161167 isoform X2 [Acyrthosiphon pisum]	XM_003243204.3	XM_003243204	3020	0	PREDICTED: Acyrthosiphon pisum uncharacterized LOC100161167 (LOC100161167), transcript variant X2, mRNA	K12737	SDCCAG10	peptidyl-prolyl cis-trans isomerase SDCCAG10	http://www.genome.jp/dbget-bin/www_bget?ko:K12737	--	--	--	--	PF08612	TATA-binding related factor (TRF) of subunit 20 of Mediator complex	GO:0006357	regulation of transcription from RNA polymerase II promoter	GO:0001104	RNA polymerase II transcription cofactor activity	GO:0016592	mediator complex	--	--
173	Cluster-4288.0	1128	8330068	XP_016661761.1	1484	6.8e-162	PREDICTED: TBC1 domain family member 9 isoform X1 [Acyrthosiphon pisum]	XM_001946882.4	XM_001946882	949	0	PREDICTED: Acyrthosiphon pisum TBC1 domain family member 9 (LOC100165571), transcript variant X2, mRNA	--	--	--	--	Q6ZT07	705	5.5e-73	TBC1 domain family member 9 OS=Homo sapiens OX=9606 GN=TBC1D9 PE=2 SV=2	PF04275//PF00644	Phosphomevalonate kinase//Poly(ADP-ribose) polymerase catalytic domain	GO:0006695//GO:0006694	cholesterol biosynthetic process//steroid biosynthetic process	GO:0003950//GO:0004631	NAD+ ADP-ribosyltransferase activity//phosphomevalonate kinase activity	GO:0005737	cytoplasm	KOG4347	GTPase-activating protein VRP
174	Cluster-3703.0	1601	10812039	XP_022177646.1	457	1.2e-42	uncharacterized protein LOC111038727 [Myzus persicae]	--	--	--	--	--	--	--	--	--	--	--	--	--	PF05485//PF15952//PF02465//PF04977	THAP domain//Enhancer of split M4 family//Flagellar hook-associated protein 2 N-terminus//Septum formation initiator	GO:0007423//GO:0007219//GO:0007049	sensory organ development//Notch signaling pathway//cell cycle	GO:0003676	nucleic acid binding	GO:0009424	bacterial-type flagellum hook	--	--
175	Cluster-12798.0	688	8333071	XP_016656027.1	847	3e-88	PREDICTED: LOW QUALITY PROTEIN: polycomb protein suz12-B [Acyrthosiphon pisum]	XM_016800538.1	XM_016800538	626	0	PREDICTED: Acyrthosiphon pisum polycomb protein suz12-B (LOC100163595), mRNA	K11463	SUZ12	polycomb protein SUZ12	http://www.genome.jp/dbget-bin/www_bget?ko:K11463	Q15022	304	1.1e-26	Polycomb protein SUZ12 OS=Homo sapiens OX=9606 GN=SUZ12 PE=1 SV=3	PF13304	AAA domain, putative AbiEii toxin, Type IV TA system	--	--	GO:0005524	ATP binding	--	--	--	--
176	Cluster-3959.788	2524	10805578	XP_022170533.1	831	8e-86	probable uridine-cytidine kinase [Myzus persicae]	NM_001293363.1	NM_001293363	547	0	Acyrthosiphon pisum probable uridine-cytidine kinase (LOC100167465), mRNA	K00876	udk, UCK	uridine kinase	http://www.genome.jp/dbget-bin/www_bget?ko:K00876	Q9VC99	556	2.3e-55	Probable uridine-cytidine kinase OS=Drosophila melanogaster OX=7227 GN=CG6364 PE=3 SV=1	PF00437//PF06414//PF00485//PF09547//PF02224//PF01121//PF00910	Type II/IV secretion system protein//Zeta toxin//Phosphoribulokinase / Uridine kinase family//Stage IV sporulation protein A (spore_IV_A)//Cytidylate kinase//Dephospho-CoA kinase//RNA helicase	GO:0008152//GO:0006206//GO:0006139//GO:0006810//GO:0015937//GO:0015940//GO:0043934	metabolic process//pyrimidine nucleobase metabolic process//nucleobase-containing compound metabolic process//transport//coenzyme A biosynthetic process//pantothenate biosynthetic process//sporulation	GO:0003724//GO:0016887//GO:0004127//GO:0004140//GO:0005524//GO:0003723//GO:0016301	RNA helicase activity//ATPase activity//cytidylate kinase activity//dephospho-CoA kinase activity//ATP binding//RNA binding//kinase activity	--	--	KOG4203	Armadillo/beta-Catenin/plakoglobin
177	Cluster-3959.789	451	--	--	--	--	--	XM_001947081.4	XM_001947081	62	8.58e-22	PREDICTED: Acyrthosiphon pisum short coiled-coil protein A (LOC100159744), mRNA	--	--	--	--	--	--	--	--	--	--	--	--	--	--	--	--	--	--
178	Cluster-6812.0	2670	7690389	XP_015379523.1	2393	6.3e-267	PREDICTED: coatomer subunit delta [Diuraphis noxia]	XM_001944394.4	XM_001944394	2068	0	PREDICTED: Acyrthosiphon pisum coatomer subunit delta (LOC100164111), mRNA	--	--	--	--	Q5XJY5	1372	5.9e-150	Coatomer subunit delta OS=Mus musculus OX=10090 GN=Arcn1 PE=1 SV=2	PF11568	Mediator complex subunit 29	--	--	--	--	GO:0016592	mediator complex	KOG2635	Medium subunit of clathrin adaptor complex
179	Cluster-10944.0	2035	8350885	XP_016663146.1	2496	5.5e-279	PREDICTED: CXXC-type zinc finger protein 1 [Acyrthosiphon pisum]	XM_008188806.2	XM_008188806	1859	0	PREDICTED: Acyrthosiphon pisum CXXC-type zinc finger protein 1 (LOC103310456), transcript variant X1, mRNA	K14960	CXXC1, SPP1, CPS40	COMPASS component SPP1	http://www.genome.jp/dbget-bin/www_bget?ko:K14960	Q9W352	1260	4.4e-137	CXXC-type zinc finger protein 1 OS=Drosophila melanogaster OX=7227 GN=Cfp1 PE=1 SV=1	PF00628//PF02008	PHD-finger//CXXC zinc finger domain	--	--	GO:0003677//GO:0008270//GO:0005515	DNA binding//zinc ion binding//protein binding	--	--	KOG1632	Uncharacterized PHD Zn-finger protein
180	Cluster-5591.0	2102	8335536	XP_016656776.1	3050	0	PREDICTED: maltase A3-like [Acyrthosiphon pisum]	XM_016801287.1	XM_016801287	1714	0	PREDICTED: Acyrthosiphon pisum maltase A3-like (LOC100168244), transcript variant X2, mRNA	K14210	SLC3A1, RBAT	solute carrier family 3 (neutral and basic amino acid transporter), member 1	http://www.genome.jp/dbget-bin/www_bget?ko:K14210	O16099	1094	8e-118	Maltase 2 OS=Drosophila virilis OX=7244 GN=Mal-B2 PE=3 SV=2	PF00128	Alpha amylase, catalytic domain	GO:0005975	carbohydrate metabolic process	GO:0003824//GO:0043169	catalytic activity//cation binding	--	--	--	--
181	Cluster-5302.0	1490	4414233	XP_008181841.1	2086	1.4e-231	PREDICTED: mitochondrial import inner membrane translocase subunit Tim17-B isoform X1 [Acyrthosiphon pisum]	XM_008183619.2	XM_008183619	1284	0	PREDICTED: Acyrthosiphon pisum mitochondrial import inner membrane translocase subunit Tim17-B (LOC100161229), transcript variant X1, mRNA	K10887	DCLRE1C, ARTEMIS, SCIDA	DNA cross-link repair 1C protein	http://www.genome.jp/dbget-bin/www_bget?ko:K10887	Q5XIX3	411	8.9e-39	Protein artemis OS=Rattus norvegicus OX=10116 GN=Dclre1c PE=1 SV=1	--	--	--	--	--	--	--	--	KOG1361	Predicted hydrolase involved in interstrand cross-link repair
182	Cluster-7686.0	1721	8338817	XP_016657660.1	2188	2.4e-243	PREDICTED: ..11Z..-hexadec-11-enoyl-CoA conjugase [Acyrthosiphon pisum]	XM_001943691.4	XM_001943691	1474	0	PREDICTED: Acyrthosiphon pisum (11Z)-hexadec-11-enoyl-CoA conjugase (LOC100168230), transcript variant X1, mRNA	K00507	SCD, desC	stearoyl-CoA desaturase (delta-9 desaturase)	http://www.genome.jp/dbget-bin/www_bget?ko:K00507	Q75PL7	812	3.3e-85	(11Z)-hexadec-11-enoyl-CoA conjugase OS=Bombyx mori OX=7091 GN=desat1 PE=1 SV=1	PF04973//PF00487	Nicotinamide mononucleotide transporter//Fatty acid desaturase	GO:0034258//GO:0006629	nicotinamide riboside transport//lipid metabolic process	GO:0034257	nicotinamide riboside transmembrane transporter activity	GO:0016020	membrane	KOG1600	Fatty acid desaturase
183	Cluster-12541.0	313	--	--	--	--	--	XM_016804006.1	XM_016804006	55	4.49e-18	PREDICTED: Acyrthosiphon pisum E3 ubiquitin-protein ligase FANCL-like (LOC100161477), transcript variant X4, mRNA	--	--	--	--	--	--	--	--	--	--	--	--	--	--	--	--	--	--
184	Cluster-526.0	1925	7700047	XP_015372786.1	626	3.6e-62	PREDICTED: PEST proteolytic signal-containing nuclear protein-like [Diuraphis noxia]	NM_001162673.2	NM_001162673	825	0	Acyrthosiphon pisum PEST proteolytic signal-containing nuclear protein (Pcnp), mRNA	--	--	--	--	Q32PF3	249	7e-20	PEST proteolytic signal-containing nuclear protein OS=Bos taurus OX=9913 GN=PCNP PE=2 SV=1	PF15473	PEST, proteolytic signal-containing nuclear protein family	GO:0016567	protein ubiquitination	--	--	--	--	--	--
185	Cluster-6971.0	5698	10803038	XP_022167727.1	7435	0	uncharacterized protein LOC111031916 isoform X2 [Myzus persicae]	XM_016808862.1	XM_016808862	3533	0	PREDICTED: Acyrthosiphon pisum uncharacterized LOC100569640 (LOC100569640), mRNA	--	--	--	--	Q9QW30	176	6.1e-11	Neurogenic locus notch homolog protein 2 OS=Rattus norvegicus OX=10116 GN=Notch2 PE=1 SV=1	PF13895//PF00008	Immunoglobulin domain//EGF-like domain	--	--	GO:0005515	protein binding	--	--	--	--
186	Cluster-6704.0	1657	8347940	XP_001948488.3	2550	2.4e-285	PREDICTED: probable cytochrome P450 6a13 [Acyrthosiphon pisum]	XM_001948453.4	XM_001948453	1376	0	PREDICTED: Acyrthosiphon pisum probable cytochrome P450 6a13 (LOC100168115), mRNA	K14999	CYP6	cytochrome P450, family 6	http://www.genome.jp/dbget-bin/www_bget?ko:K14999	Q9V4U9	918	1.6e-97	Probable cytochrome P450 6a13 OS=Drosophila melanogaster OX=7227 GN=Cyp6a13 PE=2 SV=1	PF00067//PF03543	Cytochrome P450//Yersinia/Haemophilus virulence surface antigen	GO:0009405//GO:0006508//GO:0055114	pathogenesis//proteolysis//oxidation-reduction process	GO:0016705//GO:0020037//GO:0005506//GO:0004197	oxidoreductase activity, acting on paired donors, with incorporation or reduction of molecular oxygen//heme binding//iron ion binding//cysteine-type endopeptidase activity	--	--	--	--
187	Cluster-2420.0	1080	--	--	--	--	--	--	--	--	--	--	--	--	--	--	--	--	--	--	--	--	--	--	--	--	--	--	--	--
188	Cluster-10571.0	1756	--	--	--	--	--	XM_016803210.1	XM_016803210	40	6.01e-09	PREDICTED: Acyrthosiphon pisum uncharacterized LOC107883363 (LOC107883363), mRNA	--	--	--	--	--	--	--	--	--	--	--	--	--	--	--	--	--	--
189	Cluster-6295.0	443	4417471	XP_008187334.1	276	3.2e-22	PREDICTED: nuclear pore complex protein DDB_G0274915 isoform X2 [Acyrthosiphon pisum]	XM_008189112.2	XM_008189112	311	3.21e-160	PREDICTED: Acyrthosiphon pisum nuclear pore complex protein DDB_G0274915 (LOC100168425), transcript variant X2, mRNA	--	--	--	--	--	--	--	--	--	--	--	--	--	--	--	--	--	--
190	Cluster-12563.1	972	8345139	XP_016659434.1	1693	3.4e-186	PREDICTED: twitchin isoform X14 [Acyrthosiphon pisum]	XM_016803945.1	XM_016803945	882	0	PREDICTED: Acyrthosiphon pisum twitchin (LOC100166119), transcript variant X14, mRNA	K12567	TTN	titin	http://www.genome.jp/dbget-bin/www_bget?ko:K12567	Q23551	716	2.5e-74	Twitchin OS=Caenorhabditis elegans OX=6239 GN=unc-22 PE=1 SV=3	PF13895//PF00041//PF16656	Immunoglobulin domain//Fibronectin type III domain//Purple acid Phosphatase, N-terminal domain	GO:0006771//GO:0019497	riboflavin metabolic process//hexachlorocyclohexane metabolic process	GO:0046872//GO:0003993//GO:0005515	metal ion binding//acid phosphatase activity//protein binding	--	--	KOG0613	Projectin/twitchin and related proteins
191	Cluster-12563.0	398	8345139	XP_016659434.1	616	1.1e-61	PREDICTED: twitchin isoform X14 [Acyrthosiphon pisum]	XM_016803945.1	XM_016803945	374	0	PREDICTED: Acyrthosiphon pisum twitchin (LOC100166119), transcript variant X14, mRNA	--	--	--	--	Q23551	229	3e-18	Twitchin OS=Caenorhabditis elegans OX=6239 GN=unc-22 PE=1 SV=3	PF13895//PF00041	Immunoglobulin domain//Fibronectin type III domain	--	--	GO:0005515	protein binding	--	--	KOG0613	Projectin/twitchin and related proteins
192	Cluster-9095.0	539	--	--	--	--	--	--	--	--	--	--	--	--	--	--	--	--	--	--	--	--	--	--	--	--	--	--	--	--
193	Cluster-2272.1	663	--	--	--	--	--	--	--	--	--	--	--	--	--	--	--	--	--	--	--	--	--	--	--	--	--	--	--	--
194	Cluster-6830.0	3033	10808063	XP_022173262.1	3203	0	ER degradation-enhancing alpha-mannosidase-like protein 2 [Myzus persicae]	XM_015517320.1	XM_015517320	1508	0	PREDICTED: Diuraphis noxia ER degradation-enhancing alpha-mannosidase-like protein 2 (LOC107168053), transcript variant X1, mRNA	K10085	EDEM2	ER degradation enhancer, mannosidase alpha-like 2	http://www.genome.jp/dbget-bin/www_bget?ko:K10085	Q9BV94	1503	4.3e-165	ER degradation-enhancing alpha-mannosidase-like protein 2 OS=Homo sapiens OX=9606 GN=EDEM2 PE=1 SV=2	PF01532//PF08019	Glycosyl hydrolase family 47//Domain of unknown function (DUF1705)	GO:0005975	carbohydrate metabolic process	GO:0004571//GO:0005509	mannosyl-oligosaccharide 1,2-alpha-mannosidase activity//calcium ion binding	GO:0016020//GO:0016021	membrane//integral component of membrane	KOG2429	Glycosyl hydrolase, family 47
195	Cluster-439.0	3190	2476253	XP_001947931.2	1963	5.5e-217	PREDICTED: endophilin-A isoform X1 [Acyrthosiphon pisum]	XM_001947896.4	XM_001947896	2523	0	PREDICTED: Acyrthosiphon pisum endophilin-A (LOC100169394), transcript variant X1, mRNA	K11247	SH3GL	endophilin-A	http://www.genome.jp/dbget-bin/www_bget?ko:K11247	Q8I1A6	1254	3.4e-136	Endophilin-A OS=Drosophila willistoni OX=7260 GN=EndoA PE=3 SV=1	PF00018//PF08397//PF03114//PF14604	SH3 domain//IRSp53/MIM homology domain//BAR domain//Variant SH3 domain	GO:0007009	plasma membrane organization	GO:0005515	protein binding	GO:0005737	cytoplasm	KOG1118	Lysophosphatidic acid acyltransferase endophilin/SH3GL, involved in synaptic vesicle formation
196	Cluster-4354.0	331	11822507	XP_023722512.1	154	3.3e-08	uncharacterized protein LOC111872654 [Cryptotermes secundus]	CP013031.1	CP013031	331	1.78e-171	Escherichia coli strain H1827/12, complete genome	--	--	--	--	P17315	601	1.8e-61	Colicin I receptor OS=Escherichia coli (strain K12) OX=83333 GN=cirA PE=1 SV=2	--	--	--	--	--	--	--	--	--	--
197	Cluster-6096.0	1171	--	--	--	--	--	--	--	--	--	--	--	--	--	--	--	--	--	--	--	--	--	--	--	--	--	--	--	--
198	Cluster-1319.0	2740	4411799	XP_008189936.1	2590	9.3e-290	PREDICTED: phosphatidate cytidylyltransferase, photoreceptor-specific isoform X1 [Acyrthosiphon pisum]	XM_008191714.2	XM_008191714	2146	0	PREDICTED: Acyrthosiphon pisum phosphatidate cytidylyltransferase, photoreceptor-specific (LOC100163059), transcript variant X1, mRNA	K00981	E2.7.7.41, CDS1, CDS2, cdsA	phosphatidate cytidylyltransferase	http://www.genome.jp/dbget-bin/www_bget?ko:K00981	P56079	1400	3.4e-153	Phosphatidate cytidylyltransferase, photoreceptor-specific OS=Drosophila melanogaster OX=7227 GN=CdsA PE=1 SV=2	PF05511	Mitochondrial ATP synthase coupling factor 6	GO:0015986//GO:0015992	ATP synthesis coupled proton transport//proton transport	GO:0015078	hydrogen ion transmembrane transporter activity	GO:0000276	mitochondrial proton-transporting ATP synthase complex, coupling factor F(o)	KOG1440	CDP-diacylglycerol synthase
199	Cluster-8632.0	2524	8349592	XP_016661848.1	3837	0	PREDICTED: venom dipeptidyl peptidase 4 isoform X1 [Acyrthosiphon pisum]	XM_016806359.1	XM_016806359	2203	0	PREDICTED: Acyrthosiphon pisum venom dipeptidyl peptidase 4 (LOC100573274), transcript variant X1, mRNA	K01278	DPP4	dipeptidyl-peptidase 4	http://www.genome.jp/dbget-bin/www_bget?ko:K01278	B1A4F7	1035	6.6e-111	Venom dipeptidyl peptidase 4 OS=Vespula vulgaris OX=7454 PE=1 SV=1	PF00930//PF00326//PF02793//PF01738//PF02129	Dipeptidyl peptidase IV (DPP IV) N-terminal region//Prolyl oligopeptidase family//Hormone receptor domain//Dienelactone hydrolase family//X-Pro dipeptidyl-peptidase (S15 family)	GO:0007186//GO:0006508	G-protein coupled receptor signaling pathway//proteolysis	GO:0016787//GO:0008236//GO:0004930	hydrolase activity//serine-type peptidase activity//G-protein coupled receptor activity	GO:0016020	membrane	KOG2100	Dipeptidyl aminopeptidase
200	Cluster-7258.0	3129	4415143	XP_008183329.1	4345	0	PREDICTED: ER membrane protein complex subunit 1 isoform X2 [Acyrthosiphon pisum]	XM_008185107.2	XM_008185107	2917	0	PREDICTED: Acyrthosiphon pisum ER membrane protein complex subunit 1 (LOC100159479), transcript variant X2, mRNA	--	--	--	--	Q5ZL00	1064	3.6e-114	ER membrane protein complex subunit 1 OS=Gallus gallus OX=9031 GN=EMC1 PE=2 SV=1	--	--	--	--	--	--	--	--	KOG2103	Uncharacterized conserved protein
201	Cluster-6048.1	1377	4412532	XP_008178965.1	727	5e-74	PREDICTED: uncharacterized protein LOC100159074 [Acyrthosiphon pisum]	XM_008180743.2	XM_008180743	684	0	PREDICTED: Acyrthosiphon pisum uncharacterized LOC100159074 (LOC100159074), mRNA	--	--	--	--	--	--	--	--	PF17064	Sleepless protein	GO:0030431//GO:0032222//GO:1903818	sleep//regulation of synaptic transmission, cholinergic//positive regulation of voltage-gated potassium channel activity	GO:0034235	GPI anchor binding	--	--	--	--
202	Cluster-6048.0	2022	4412529	XP_008178962.1	1850	4.4e-204	PREDICTED: protein eiger [Acyrthosiphon pisum]	XM_008180740.2	XM_008180740	1415	0	PREDICTED: Acyrthosiphon pisum protein eiger (LOC103308056), mRNA	K16678	EGR	eiger	http://www.genome.jp/dbget-bin/www_bget?ko:K16678	Q9BEG5	144	1.1e-07	Ectodysplasin-A OS=Bos taurus OX=9913 GN=EDA PE=3 SV=2	PF15957//PF00229	Commissureless//TNF(Tumour Necrosis Factor) family	GO:0007411//GO:0007165//GO:0006955	axon guidance//signal transduction//immune response	GO:0005164	tumor necrosis factor receptor binding	GO:0016020	membrane	--	--
203	Cluster-7606.0	516	--	--	--	--	--	XM_001949106.4	XM_001949106	93	5.8e-39	PREDICTED: Acyrthosiphon pisum sterile alpha and TIR motif-containing protein 1-like (LOC100159450), mRNA	--	--	--	--	--	--	--	--	--	--	--	--	--	--	--	--	--	--
204	Cluster-4969.0	307	--	--	--	--	--	XM_016805126.1	XM_016805126	53	5.68e-17	PREDICTED: Acyrthosiphon pisum microsomal triglyceride transfer protein large subunit (LOC100168056), transcript variant X3, mRNA	--	--	--	--	--	--	--	--	PF07127	Late nodulin protein	GO:0009878	nodule morphogenesis	GO:0046872	metal ion binding	--	--	--	--
205	Cluster-5446.0	1758	10807466	XP_022172614.1	1002	8.3e-106	serine protease snake-like [Myzus persicae]	NM_001161907.2	NM_001161907	365	0	Acyrthosiphon pisum serine protease-like (LOC100158876), mRNA	--	--	--	--	P05049	283	7.3e-24	Serine protease snake OS=Drosophila melanogaster OX=7227 GN=snk PE=1 SV=2	PF00089	Trypsin	GO:0006508	proteolysis	GO:0004252	serine-type endopeptidase activity	--	--	--	--
206	Cluster-5081.0	433	--	--	--	--	--	--	--	--	--	--	--	--	--	--	--	--	--	--	--	--	--	--	--	--	--	--	--	--
207	Cluster-4787.0	374	8330705	XP_001952207.3	670	5.5e-68	PREDICTED: uncharacterized protein LOC100161421 [Acyrthosiphon pisum]	XM_001952172.3	XM_001952172	346	9.36e-180	PREDICTED: Acyrthosiphon pisum uncharacterized LOC100161421 (LOC100161421), mRNA	--	--	--	--	--	--	--	--	--	--	--	--	--	--	--	--	--	--
208	Cluster-10425.0	463	1168753	XP_001945627.1	807	8.8e-84	PREDICTED: probable E3 ubiquitin-protein ligase HECTD2 [Acyrthosiphon pisum]	XM_001945592.2	XM_001945592	424	0	PREDICTED: Acyrthosiphon pisum probable E3 ubiquitin-protein ligase HECTD2 (LOC100164401), mRNA	K12232	HECTD2	E3 ubiquitin-protein ligase HECTD2	http://www.genome.jp/dbget-bin/www_bget?ko:K12232	Q5U5R9	474	1.4e-46	Probable E3 ubiquitin-protein ligase HECTD2 OS=Homo sapiens OX=9606 GN=HECTD2 PE=2 SV=2	PF00632	HECT-domain (ubiquitin-transferase)	GO:0016567	protein ubiquitination	GO:0004842	ubiquitin-protein transferase activity	--	--	KOG0941	E3 ubiquitin protein ligase
209	Cluster-12360.0	964	--	--	--	--	--	--	--	--	--	--	--	--	--	--	--	--	--	--	--	--	--	--	--	--	--	--	--	--
210	Cluster-811.0	1319	10810970	XP_022176470.1	1978	4.1e-219	lachesin-like [Myzus persicae]	FP925449.1	FP925449	1223	0	Acyrthosiphon pisum mRNA, clone: ACI0AAF4YB06, full-insert cDNA sequence based on ESTs (5'-EST:ACI0AAF4YB06AAM1, 3'-EST ACI2AAF1YP01BBM1)	--	--	--	--	Q24372	350	9.4e-32	Lachesin OS=Drosophila melanogaster OX=7227 GN=Lac PE=1 SV=2	PF13895	Immunoglobulin domain	--	--	GO:0005515	protein binding	--	--	--	--
211	Cluster-6466.1	1800	10803415	XP_022168151.1	1638	1.5e-179	T-box transcription factor TBX20-like [Myzus persicae]	XM_008188106.2	XM_008188106	1568	0	PREDICTED: Acyrthosiphon pisum T-box protein H15-like (LOC100167986), mRNA	K10185	TBX20	T-box protein 20	http://www.genome.jp/dbget-bin/www_bget?ko:K10185	Q8UW76	913	6.6e-97	T-box transcription factor TBX20 OS=Gallus gallus OX=9031 GN=TBX20 PE=2 SV=1	PF00907	T-box	GO:0006355	regulation of transcription, DNA-templated	GO:0003700	transcription factor activity, sequence-specific DNA binding	GO:0005634//GO:0005667	nucleus//transcription factor complex	KOG3586	TBX1 and related T-box transcription factors
212	Cluster-7539.0	3279	2476630	XP_001949040.2	5039	0	PREDICTED: superkiller viralicidic activity 2-like 2 [Acyrthosiphon pisum]	XM_001949005.4	XM_001949005	2999	0	PREDICTED: Acyrthosiphon pisum superkiller viralicidic activity 2-like 2 (LOC100158988), mRNA	K12598	MTR4, SKIV2L2	ATP-dependent RNA helicase DOB1	http://www.genome.jp/dbget-bin/www_bget?ko:K12598	Q9CZU3	2950	0	Exosome RNA helicase MTR4 OS=Mus musculus OX=10090 GN=Mtrex PE=1 SV=1	PF01637//PF00270//PF04851	Archaeal ATPase//DEAD/DEAH box helicase//Type III restriction enzyme, res subunit	--	--	GO:0003677//GO:0016787//GO:0005524//GO:0003676	DNA binding//hydrolase activity//ATP binding//nucleic acid binding	--	--	KOG0948	Nuclear exosomal RNA helicase MTR4, DEAD-box superfamily
213	Cluster-11253.0	1097	2477372	XP_001952748.2	1756	1.9e-193	PREDICTED: glycoprotein 3-alpha-L-fucosyltransferase A-like [Acyrthosiphon pisum]	XM_001952713.4	XM_001952713	905	0	PREDICTED: Acyrthosiphon pisum glycoprotein 3-alpha-L-fucosyltransferase A-like (LOC100163995), mRNA	K00753	E2.4.1.214	glycoprotein 3-alpha-L-fucosyltransferase	http://www.genome.jp/dbget-bin/www_bget?ko:K00753	Q9VUL9	865	1.5e-91	Glycoprotein 3-alpha-L-fucosyltransferase A OS=Drosophila melanogaster OX=7227 GN=FucTA PE=2 SV=2	PF00852	Glycosyltransferase family 10 (fucosyltransferase) C-term	GO:0006486	protein glycosylation	GO:0008417	fucosyltransferase activity	GO:0016020	membrane	KOG2619	Fucosyltransferase
214	Cluster-10998.0	374	--	--	--	--	--	--	--	--	--	--	--	--	--	--	--	--	--	--	--	--	--	--	--	--	--	--	--	--
215	Cluster-12922.0	515	--	--	--	--	--	--	--	--	--	--	--	--	--	--	--	--	--	--	--	--	--	--	--	--	--	--	--	--
216	Cluster-8192.0	2152	--	--	--	--	--	XM_008187117.2	XM_008187117	113	1.94e-49	PREDICTED: Acyrthosiphon pisum type I inositol 1,4,5-trisphosphate 5-phosphatase (LOC100164713), transcript variant X4, mRNA	--	--	--	--	--	--	--	--	--	--	--	--	--	--	--	--	--	--
217	Cluster-2255.0	4993	8351152	XP_008187385.2	7236	0	PREDICTED: laminin subunit alpha [Acyrthosiphon pisum]	XM_008189163.2	XM_008189163	4592	0	PREDICTED: Acyrthosiphon pisum laminin subunit alpha (LOC100169395), mRNA	--	--	--	--	Q00174	1203	4.4e-130	Laminin subunit alpha OS=Drosophila melanogaster OX=7227 GN=LanA PE=1 SV=2	PF05478//PF06008//PF06009//PF04319	Prominin//Laminin Domain I//Laminin Domain II//NifZ domain	GO:0007165//GO:0007155//GO:0030155//GO:0030334//GO:0009399//GO:0045995	signal transduction//cell adhesion//regulation of cell adhesion//regulation of cell migration//nitrogen fixation//regulation of embryonic development	GO:0005102	receptor binding	GO:0016021	integral component of membrane	--	--
218	Cluster-6532.0	3550	2476656	XP_001947767.2	5097	0	PREDICTED: ATP-dependent RNA helicase DHX36 [Acyrthosiphon pisum]	XM_001947732.4	XM_001947732	3268	0	PREDICTED: Acyrthosiphon pisum ATP-dependent RNA helicase DHX36 (LOC100164920), mRNA	K14442	DHX36, RHAU	ATP-dependent RNA helicase DHX36	http://www.genome.jp/dbget-bin/www_bget?ko:K14442	Q9H2U1	1737	3.7e-192	ATP-dependent RNA helicase DHX36 OS=Homo sapiens OX=9606 GN=DHX36 PE=1 SV=2	PF00270//PF00437//PF04851//PF04408	DEAD/DEAH box helicase//Type II/IV secretion system protein//Type III restriction enzyme, res subunit//Helicase associated domain (HA2)	GO:0006810	transport	GO:0004386//GO:0016787//GO:0003677//GO:0005524//GO:0003676	helicase activity//hydrolase activity//DNA binding//ATP binding//nucleic acid binding	--	--	KOG0920	ATP-dependent RNA helicase A
219	Cluster-9035.0	3059	5663084	XP_012288655.1	2863	0	eukaryotic translation initiation factor 3 subunit C [Orussus abietinus]	XM_003243882.3	XM_003243882	2640	0	PREDICTED: Acyrthosiphon pisum eukaryotic translation initiation factor 3 subunit C (LOC100162322), transcript variant X2, mRNA	K03252	EIF3C	translation initiation factor 3 subunit C	http://www.genome.jp/dbget-bin/www_bget?ko:K03252	Q17Q06	2592	2.3e-291	Eukaryotic translation initiation factor 3 subunit C OS=Aedes aegypti OX=7159 GN=eIF3-S8 PE=3 SV=1	PF01399//PF08430//PF03934//PF05470	PCI domain//Forkhead N-terminal region//Type II secretion system (T2SS), protein K//Eukaryotic translation initiation factor 3 subunit 8 N-terminus	GO:0006446//GO:0006413//GO:0009306	regulation of translational initiation//translational initiation//protein secretion	GO:0031369//GO:0019904//GO:0003743//GO:0005515//GO:0008134	translation initiation factor binding//protein domain specific binding//translation initiation factor activity//protein binding//transcription factor binding	GO:0005667//GO:0005852//GO:0005840//GO:0016021	transcription factor complex//eukaryotic translation initiation factor 3 complex//ribosome//integral component of membrane	KOG1076	Translation initiation factor 3, subunit c (eIF-3c)
220	Cluster-405.0	1957	10800500	XP_022164929.1	2497	4.1e-279	vacuolar protein sorting-associated protein 33B [Myzus persicae]	XM_001945777.4	XM_001945777	1509	0	PREDICTED: Acyrthosiphon pisum vacuolar protein sorting-associated protein 33B (LOC100164414), mRNA	--	--	--	--	Q63616	406	4.5e-38	Vacuolar protein sorting-associated protein 33B OS=Rattus norvegicus OX=10116 GN=Vps33b PE=2 SV=1	PF00995//PF12424//PF13892	Sec1 family//Plasma membrane calcium transporter ATPase C terminal//DNA-binding domain	GO:0006816//GO:0016192//GO:0006904	calcium ion transport//vesicle-mediated transport//vesicle docking involved in exocytosis	GO:0005388//GO:0003677	calcium-transporting ATPase activity//DNA binding	GO:0016529	sarcoplasmic reticulum	KOG1302	Vacuolar sorting protein VPS33/slp1 (Sec1 family)
221	Cluster-10325.2	1730	--	--	--	--	--	XM_003242264.3	XM_003242264	199	2.42e-97	PREDICTED: Acyrthosiphon pisum protein tramtrack, alpha isoform (LOC100571167), mRNA	--	--	--	--	--	--	--	--	--	--	--	--	--	--	--	--	--	--
222	Cluster-704.0	4261	8334306	XP_001944484.3	5040	0	PREDICTED: integrator complex subunit 3 [Acyrthosiphon pisum]	XM_001944449.4	XM_001944449	3970	0	PREDICTED: Acyrthosiphon pisum integrator complex subunit 3 (LOC100168776), mRNA	K13140	INTS3	integrator complex subunit 3	http://www.genome.jp/dbget-bin/www_bget?ko:K13140	Q7TPD0	2066	3.2e-230	Integrator complex subunit 3 OS=Mus musculus OX=10090 GN=Ints3 PE=1 SV=2	PF05731//PF04625	TROVE domain//DEC-1 protein, N-terminal region	GO:0007304	chorion-containing eggshell formation	GO:0003723//GO:0005213	RNA binding//structural constituent of chorion	GO:0042600//GO:0005576	chorion//extracellular region	KOG4262	Uncharacterized conserved protein
223	Cluster-4947.0	500	2474596	XP_001943285.2	849	1.3e-88	PREDICTED: protein furry [Acyrthosiphon pisum]	XM_001943250.4	XM_001943250	464	0	PREDICTED: Acyrthosiphon pisum protein furry (LOC100165819), mRNA	--	--	--	--	Q9VT28	548	3.9e-55	Protein furry OS=Drosophila melanogaster OX=7227 GN=fry PE=1 SV=2	--	--	--	--	--	--	--	--	KOG1825	Fry-like conserved proteins
224	Cluster-3116.0	3085	4415973	XP_008184750.1	2466	2.5e-275	PREDICTED: transcription factor IIIB 90 kDa subunit [Acyrthosiphon pisum]	XM_008186528.2	XM_008186528	1923	0	PREDICTED: Acyrthosiphon pisum transcription factor IIIB 90 kDa subunit (LOC100160791), transcript variant X2, mRNA	K15196	BRF1, GTF3B	transcription factor IIIB 90 kDa subunit	http://www.genome.jp/dbget-bin/www_bget?ko:K15196	Q92994	788	3.6e-82	Transcription factor IIIB 90 kDa subunit OS=Homo sapiens OX=9606 GN=BRF1 PE=1 SV=1	PF00382	Transcription factor TFIIB repeat	--	--	GO:0017025	TBP-class protein binding	--	--	KOG1598	Transcription initiation factor TFIIIB, Brf1 subunit
225	Cluster-6736.1	346	--	--	--	--	--	--	--	--	--	--	--	--	--	--	--	--	--	--	--	--	--	--	--	--	--	--	--	--
226	Cluster-6040.0	1002	--	--	--	--	--	XM_003247840.2	XM_003247840	504	0	PREDICTED: Acyrthosiphon pisum venom dipeptidyl peptidase 4 (LOC100575324), mRNA	--	--	--	--	--	--	--	--	--	--	--	--	--	--	--	--	--	--
227	Cluster-6736.2	563	5576811	XP_012145740.1	370	5.1e-33	PREDICTED: general transcription factor II-I repeat domain-containing protein 2A-like [Megachile rotundata]	--	--	--	--	--	--	--	--	--	A4IFA3	160	4.3e-10	General transcription factor II-I repeat domain-containing protein 2 OS=Bos taurus OX=9913 GN=GTF2IRD2 PE=2 SV=1	PF05699	hAT family C-terminal dimerisation region	--	--	GO:0046983	protein dimerization activity	--	--	--	--
228	Cluster-7525.0	454	--	--	--	--	--	XM_003244528.3	XM_003244528	264	4.42e-134	PREDICTED: Acyrthosiphon pisum uncharacterized LOC100571486 (LOC100571486), mRNA	--	--	--	--	--	--	--	--	--	--	--	--	--	--	--	--	--	--
229	Cluster-11362.1	1063	4416706	XP_008186065.1	1731	1.5e-190	PREDICTED: uncharacterized protein LOC100164078 isoform X4 [Acyrthosiphon pisum]	XM_008187843.2	XM_008187843	994	0	PREDICTED: Acyrthosiphon pisum uncharacterized LOC100164078 (LOC100164078), transcript variant X4, mRNA	--	--	--	--	--	--	--	--	PF00664	ABC transporter transmembrane region	GO:0006810//GO:0055085	transport//transmembrane transport	GO:0005524//GO:0042626	ATP binding//ATPase activity, coupled to transmembrane movement of substances	GO:0016021	integral component of membrane	--	--
230	Cluster-9191.1	2025	1657272	NP_001156275.1	1042	2.2e-110	ribosome biogenesis regulatory protein homolog [Acyrthosiphon pisum]	NM_001162803.2	NM_001162803	668	0	Acyrthosiphon pisum RRS1 ribosome biogenesis regulator homolog (rrs1), mRNA	K14852	RRS1	regulator of ribosome biosynthesis	http://www.genome.jp/dbget-bin/www_bget?ko:K14852	A8WY26	397	5.1e-37	Ribosome biogenesis regulatory protein homolog OS=Caenorhabditis briggsae OX=6238 GN=rrbs-1 PE=3 SV=1	PF04939	Ribosome biogenesis regulatory protein (RRS1)	GO:0042254	ribosome biogenesis	--	--	GO:0005634	nucleus	KOG1765	Regulator of ribosome synthesis
231	Cluster-188.0	509	2475489	XP_001946214.2	913	5e-96	PREDICTED: diacylglycerol kinase eta [Acyrthosiphon pisum]	XM_001946179.4	XM_001946179	494	0	PREDICTED: Acyrthosiphon pisum diacylglycerol kinase eta (LOC100166369), mRNA	K00901	dgkA, DGK	diacylglycerol kinase (ATP)	http://www.genome.jp/dbget-bin/www_bget?ko:K00901	B4JHJ7	648	1e-66	Diacylglycerol kinase eta OS=Drosophila grimshawi OX=7222 GN=GH18973 PE=3 SV=1	PF00105//PF00130//PF07649	Zinc finger, C4 type (two domains)//Phorbol esters/diacylglycerol binding domain (C1 domain)//C1-like domain	GO:0055114//GO:0035556//GO:0006355	oxidation-reduction process//intracellular signal transduction//regulation of transcription, DNA-templated	GO:0008270//GO:0003700//GO:0047134//GO:0043565	zinc ion binding//transcription factor activity, sequence-specific DNA binding//protein-disulfide reductase activity//sequence-specific DNA binding	GO:0005667//GO:0005634	transcription factor complex//nucleus	KOG1170	Diacylglycerol kinase
232	Cluster-11362.0	1698	7697153	XP_015369565.1	2640	9.2e-296	PREDICTED: uncharacterized protein LOC107165721 isoform X1 [Diuraphis noxia]	XM_003246494.3	XM_003246494	1628	0	PREDICTED: Acyrthosiphon pisum uncharacterized LOC100164078 (LOC100164078), transcript variant X1, mRNA	--	--	--	--	--	--	--	--	--	--	--	--	--	--	--	--	--	--
233	Cluster-12862.0	315	--	--	--	--	--	--	--	--	--	--	--	--	--	--	--	--	--	--	--	--	--	--	--	--	--	--	--	--
234	Cluster-3959.2653	2777	8349554	XP_016661810.1	279	8.9e-22	PREDICTED: uncharacterized protein LOC100162883 isoform X1 [Acyrthosiphon pisum]	XM_008187156.2	XM_008187156	481	0	PREDICTED: Acyrthosiphon pisum uncharacterized LOC100162883 (LOC100162883), transcript variant X3, mRNA	K14400	PCF11	pre-mRNA cleavage complex 2 protein Pcf11	http://www.genome.jp/dbget-bin/www_bget?ko:K14400	--	--	--	--	--	--	--	--	--	--	--	--	KOG2071	mRNA cleavage and polyadenylation factor I/II complex, subunit Pcf11
235	Cluster-12921.2	1224	1596437	BAH70558.1	1191	7e-128	ACYPI007065 [Acyrthosiphon pisum]	NM_001162218.2	NM_001162218	818	0	Acyrthosiphon pisum stromal cell-derived factor 2-like (LOC100166170), mRNA	--	--	--	--	Q3SZ45	530	1.2e-52	Stromal cell-derived factor 2 OS=Bos taurus OX=9913 GN=SDF2 PE=2 SV=1	PF02815	MIR domain	--	--	--	--	GO:0016020	membrane	KOG3358	Uncharacterized secreted protein SDF2 (Stromal cell-derived factor 2), contains MIR domains
236	Cluster-11362.3	311	4416705	XP_008186064.1	523	5.1e-51	PREDICTED: uncharacterized protein LOC100164078 isoform X2 [Acyrthosiphon pisum]	XM_008187843.2	XM_008187843	308	1.02e-158	PREDICTED: Acyrthosiphon pisum uncharacterized LOC100164078 (LOC100164078), transcript variant X4, mRNA	--	--	--	--	--	--	--	--	--	--	--	--	--	--	--	--	--	--
237	Cluster-3030.0	353	11677050	XP_023307668.1	350	6.6e-31	uncharacterized protein LOC111689429 [Lucilia cuprina]	CP013031.1	CP013031	353	0	Escherichia coli strain H1827/12, complete genome	--	--	--	--	P77374	613	7.9e-63	Putative dimethyl sulfoxide reductase chain YnfE OS=Escherichia coli (strain K12) OX=83333 GN=ynfE PE=1 SV=1	PF04879//PF00384	Molybdopterin oxidoreductase Fe4S4 domain//Molybdopterin oxidoreductase	GO:0055114	oxidation-reduction process	GO:0016491	oxidoreductase activity	--	--	--	--
238	Cluster-11807.1	1306	1624448	NP_001155810.1	733	9.5e-75	heterochromatin protein 1-like [Acyrthosiphon pisum]	NM_001162338.2	NM_001162338	954	0	Acyrthosiphon pisum heterochromatin protein 1-like (LOC100169040), mRNA	K11587	CBX5, HP1A	chromobox protein 5	http://www.genome.jp/dbget-bin/www_bget?ko:K11587	P45973	236	1.5e-18	Chromobox protein homolog 5 OS=Homo sapiens OX=9606 GN=CBX5 PE=1 SV=1	PF01393	Chromo shadow domain	--	--	--	--	GO:0005634	nucleus	--	--
239	Cluster-24.0	1252	1167534	XP_001947527.1	956	1.3e-100	PREDICTED: uncharacterized protein LOC100165164 [Acyrthosiphon pisum]	XM_001947492.4	XM_001947492	1138	0	PREDICTED: Acyrthosiphon pisum uncharacterized LOC100165164 (LOC100165164), mRNA	--	--	--	--	--	--	--	--	PF08513	LisH	--	--	GO:0005515	protein binding	--	--	--	--
240	Cluster-4387.0	1780	12044338	PSN41939.1	1093	2.3e-116	N-acetylglucosaminyl-phosphatidylinositol biosynthetic protein [Blattella germanica]	XM_008187474.2	XM_008187474	835	0	PREDICTED: Acyrthosiphon pisum N-acetylglucosaminyl-phosphatidylinositol biosynthetic protein (LOC100161768), transcript variant X2, mRNA	K03857	PIGA, GPI3	phosphatidylinositol glycan, class A	http://www.genome.jp/dbget-bin/www_bget?ko:K03857	P37287	818	6.8e-86	Phosphatidylinositol N-acetylglucosaminyltransferase subunit A OS=Homo sapiens OX=9606 GN=PIGA PE=1 SV=1	PF08288	PIGA (GPI anchor biosynthesis)	GO:0006506	GPI anchor biosynthetic process	--	--	--	--	KOG1111	N-acetylglucosaminyltransferase complex, subunit PIG-A/SPT14, required for phosphatidylinositol biosynthesis/Sulfolipid synthase
241	Cluster-5495.0	634	--	--	--	--	--	--	--	--	--	--	--	--	--	--	--	--	--	--	--	--	--	--	--	--	--	--	--	--
242	Cluster-2879.0	467	--	--	--	--	--	XM_008187641.2	XM_008187641	381	0	PREDICTED: Acyrthosiphon pisum probable nuclear hormone receptor HR38 (LOC100162780), mRNA	--	--	--	--	--	--	--	--	--	--	--	--	--	--	--	--	--	--
243	Cluster-5495.1	1831	10800895	XP_022165354.1	1376	3.7e-149	thioredoxin-related transmembrane protein 2 homolog [Myzus persicae]	XM_001948578.4	XM_001948578	1194	0	PREDICTED: Acyrthosiphon pisum thioredoxin-related transmembrane protein 2 homolog (LOC100159992), mRNA	--	--	--	--	Q7JW12	799	1.1e-83	Thioredoxin-related transmembrane protein 2 homolog OS=Drosophila melanogaster OX=7227 GN=CG11007 PE=2 SV=1	PF00747//PF00085	ssDNA binding protein//Thioredoxin	GO:0045454//GO:0006260	cell redox homeostasis//DNA replication	GO:0003697	single-stranded DNA binding	GO:0042025	host cell nucleus	KOG0914	Thioredoxin-like protein
244	Cluster-3420.0	538	--	--	--	--	--	XM_001942497.4	XM_001942497	206	9.26e-102	PREDICTED: Acyrthosiphon pisum uncharacterized LOC100165522 (LOC100165522), mRNA	--	--	--	--	--	--	--	--	--	--	--	--	--	--	--	--	--	--
245	Cluster-10513.0	879	8350005	XP_016662254.1	758	8.1e-78	PREDICTED: retinoblastoma-like protein 1 [Acyrthosiphon pisum]	XM_016806765.1	XM_016806765	695	0	PREDICTED: Acyrthosiphon pisum retinoblastoma-like protein 1 (LOC100167242), mRNA	K04681	RBL1	retinoblastoma-like protein 1	http://www.genome.jp/dbget-bin/www_bget?ko:K04681	P28749	354	2.1e-32	Retinoblastoma-like protein 1 OS=Homo sapiens OX=9606 GN=RBL1 PE=1 SV=3	PF01857//PF00382	Retinoblastoma-associated protein B domain//Transcription factor TFIIB repeat	GO:0051726	regulation of cell cycle	GO:0017025	TBP-class protein binding	GO:0005634	nucleus	--	--
246	Cluster-7031.0	403	10801255	XP_022165753.1	510	2.1e-49	uncharacterized protein LOC111030529 [Myzus persicae]	XM_015517714.1	XM_015517714	275	2.98e-140	PREDICTED: Diuraphis noxia uncharacterized LOC107168337 (LOC107168337), mRNA	--	--	--	--	--	--	--	--	PF02317	NAD/NADP octopine/nopaline dehydrogenase, alpha-helical domain	GO:0055114	oxidation-reduction process	GO:0016491//GO:0050662	oxidoreductase activity//coenzyme binding	--	--	--	--
247	Cluster-8919.0	340	--	--	--	--	--	XM_003243976.3	XM_003243976	264	3.23e-134	PREDICTED: Acyrthosiphon pisum uncharacterized LOC100571618 (LOC100571618), mRNA	--	--	--	--	--	--	--	--	PF05434//PF05405	TMEM9//Mitochondrial ATP synthase B chain precursor (ATP-synt_B)	GO:0015986//GO:0015992	ATP synthesis coupled proton transport//proton transport	GO:0015078	hydrogen ion transmembrane transporter activity	GO:0016021	integral component of membrane	--	--
248	Cluster-2859.0	617	8344394	XP_008182281.2	673	4.1e-68	PREDICTED: PMS1 protein homolog 1-like [Acyrthosiphon pisum]	XM_008184059.2	XM_008184059	371	0	PREDICTED: Acyrthosiphon pisum PMS1 protein homolog 1-like (LOC103309202), mRNA	--	--	--	--	--	--	--	--	PF00309	Sigma-54 factor, Activator interacting domain (AID)	GO:0006355//GO:0006352//GO:0006206//GO:0006351//GO:0006144	regulation of transcription, DNA-templated//DNA-templated transcription, initiation//pyrimidine nucleobase metabolic process//transcription, DNA-templated//purine nucleobase metabolic process	GO:0003899//GO:0003677//GO:0016987//GO:0003700	DNA-directed RNA polymerase activity//DNA binding//sigma factor activity//transcription factor activity, sequence-specific DNA binding	GO:0005667//GO:0005730	transcription factor complex//nucleolus	--	--
249	Cluster-7318.0	767	--	--	--	--	--	--	--	--	--	--	--	--	--	--	--	--	--	--	--	--	--	--	--	--	--	--	--	--
250	Cluster-10354.0	326	8705048	ANM86813.1	258	2.8e-20	3-hydroxyisobutyrate dehydrogenase [Stygiella incarcerata]	CP013031.1	CP013031	326	1.06e-168	Escherichia coli strain H1827/12, complete genome	K00020	E1.1.1.31, mmsB	3-hydroxyisobutyrate dehydrogenase	http://www.genome.jp/dbget-bin/www_bget?ko:K00020	P77161	529	4e-53	2-hydroxy-3-oxopropionate reductase OS=Escherichia coli (strain K12) OX=83333 GN=glxR PE=2 SV=1	PF03446//PF14833	NAD binding domain of 6-phosphogluconate dehydrogenase//NAD-binding of NADP-dependent 3-hydroxyisobutyrate dehydrogenase	GO:0006098//GO:0055114//GO:0019521	pentose-phosphate shunt//oxidation-reduction process//D-gluconate metabolic process	GO:0051287//GO:0004616	NAD binding//phosphogluconate dehydrogenase (decarboxylating) activity	--	--	KOG0409	Predicted dehydrogenase
251	Cluster-4624.0	3439	10808747	XP_022174019.1	3175	0	ATP-binding cassette sub-family F member 1 isoform X1 [Myzus persicae]	XM_001947002.4	XM_001947002	1905	0	PREDICTED: Acyrthosiphon pisum ATP-binding cassette sub-family F member 1 (LOC100167570), mRNA	K06184	ABCF1	ATP-binding cassette, subfamily F, member 1	http://www.genome.jp/dbget-bin/www_bget?ko:K06184	Q6MG08	1780	3.7e-197	ATP-binding cassette sub-family F member 1 OS=Rattus norvegicus OX=10116 GN=Abcf1 PE=1 SV=1	PF01926//PF00004//PF03193//PF00005//PF13304//PF07728//PF02367//PF00910//PF03266	50S ribosome-binding GTPase//ATPase family associated with various cellular activities (AAA)//Protein of unknown function, DUF258//ABC transporter//AAA domain, putative AbiEii toxin, Type IV TA system//AAA domain (dynein-related subfamily)//Threonylcarbamoyl adenosine biosynthesis protein TsaE//RNA helicase//NTPase	GO:0002949	tRNA threonylcarbamoyladenosine modification	GO:0003723//GO:0005525//GO:0003924//GO:0005524//GO:0016887//GO:0098519//GO:0003724	RNA binding//GTP binding//GTPase activity//ATP binding//ATPase activity//nucleotide phosphatase activity, acting on free nucleotides//RNA helicase activity	--	--	KOG0927	Predicted transporter (ABC superfamily)
252	Cluster-2751.0	307	8345139	XP_016659434.1	542	3.1e-53	PREDICTED: twitchin isoform X14 [Acyrthosiphon pisum]	XM_016803945.1	XM_016803945	280	3.68e-143	PREDICTED: Acyrthosiphon pisum twitchin (LOC100166119), transcript variant X14, mRNA	K12567	TTN	titin	http://www.genome.jp/dbget-bin/www_bget?ko:K12567	Q23551	290	2e-25	Twitchin OS=Caenorhabditis elegans OX=6239 GN=unc-22 PE=1 SV=3	PF00041	Fibronectin type III domain	--	--	GO:0005515	protein binding	--	--	KOG0613	Projectin/twitchin and related proteins
253	Cluster-5420.0	508	--	--	--	--	--	--	--	--	--	--	--	--	--	--	--	--	--	--	PF11857//PF10191	Domain of unknown function (DUF3377)//Golgi complex component 7 (COG7)	GO:0006886	intracellular protein transport	GO:0004222	metalloendopeptidase activity	GO:0017119	Golgi transport complex	--	--
254	Cluster-10491.0	347	--	--	--	--	--	--	--	--	--	--	--	--	--	--	--	--	--	--	--	--	--	--	--	--	--	--	--	--
255	Cluster-180.0	731	--	--	--	--	--	--	--	--	--	--	--	--	--	--	--	--	--	--	--	--	--	--	--	--	--	--	--	--
256	Cluster-6915.0	678	8352273	XP_016664945.1	371	4.7e-33	PREDICTED: uncharacterized protein LOC107885761, partial [Acyrthosiphon pisum]	--	--	--	--	--	--	--	--	--	Q5SVZ6	138	1.8e-07	Zinc finger MYM-type protein 1 OS=Homo sapiens OX=9606 GN=ZMYM1 PE=1 SV=1	PF05699	hAT family C-terminal dimerisation region	--	--	GO:0046983	protein dimerization activity	--	--	--	--
257	Cluster-7230.0	3449	4415334	XP_008183622.1	1456	3.7e-158	PREDICTED: mediator of RNA polymerase II transcription subunit 26 [Acyrthosiphon pisum]	XM_008185400.2	XM_008185400	1762	0	PREDICTED: Acyrthosiphon pisum mediator of RNA polymerase II transcription subunit 26 (LOC100158966), mRNA	K15169	MED26	mediator of RNA polymerase II transcription subunit 26	http://www.genome.jp/dbget-bin/www_bget?ko:K15169	Q90YY5	226	5.9e-17	Mediator of RNA polymerase II transcription subunit 26 OS=Xenopus laevis OX=8355 GN=med26 PE=2 SV=1	PF08711	TFIIS helical bundle-like domain	GO:0006351	transcription, DNA-templated	GO:0003677	DNA binding	GO:0005634	nucleus	KOG1105	Transcription elongation factor TFIIS/Cofactor of enhancer-binding protein Sp1
258	Cluster-4362.0	477	11400357	XP_022833599.1	184	1.6e-11	uncharacterized protein LOC111361447 [Spodoptera litura]	CP017979.1	CP017979	477	0	Escherichia coli str. K-12 substr. W3110 substrain ZK126 genome	--	--	--	--	P69797	372	9.5e-35	PTS system mannose-specific EIIAB component OS=Escherichia coli (strain K12) OX=83333 GN=manX PE=1 SV=2	PF03830//PF00408//PF03609	PTS system sorbose subfamily IIB component//Phosphoglucomutase/phosphomannomutase, C-terminal domain//PTS system sorbose-specific iic component	GO:0009401//GO:0008643//GO:0071704	phosphoenolpyruvate-dependent sugar phosphotransferase system//carbohydrate transport//organic substance metabolic process	GO:0016868//GO:0008982	intramolecular transferase activity, phosphotransferases//protein-N(PI)-phosphohistidine-sugar phosphotransferase activity	GO:0009357//GO:0016021//GO:0005737	protein-N(PI)-phosphohistidine-sugar phosphotransferase complex//integral component of membrane//cytoplasm	--	--
259	Cluster-9206.0	350	--	--	--	--	--	--	--	--	--	--	--	--	--	--	--	--	--	--	--	--	--	--	--	--	--	--	--	--
260	Cluster-3783.0	1525	8350468	XP_016662723.1	1961	4.5e-217	PREDICTED: exonuclease mut-7 homolog isoform X2 [Acyrthosiphon pisum]	XM_016807234.1	XM_016807234	1078	0	PREDICTED: Acyrthosiphon pisum exonuclease mut-7 homolog (LOC100572602), transcript variant X2, mRNA	--	--	--	--	Q179T2	272	1.2e-22	Exonuclease mut-7 homolog OS=Aedes aegypti OX=7159 GN=AAEL005527 PE=3 SV=1	--	--	--	--	--	--	--	--	--	--
261	Cluster-1339.0	1656	12047064	PSN44665.1	1377	2.5e-149	Cytoplasmic tRNA 2-thiolation protein 1 [Blattella germanica]	NM_001293473.1	AK340692	1069	0	Acyrthosiphon pisum cytoplasmic tRNA 2-thiolation protein 1 (LOC100165789), mRNA >dbj|AK340692.1| Acyrthosiphon pisum ACYPI006714 mRNA, clone: 282E19, complete cds, full-insert cDNA sequence based on the ESTs (5'-EST:EX639691, 3'-EST:EX640631)	K14168	CTU1, NCS6	cytoplasmic tRNA 2-thiolation protein 1	http://www.genome.jp/dbget-bin/www_bget?ko:K14168	B3N7L9	1274	8.4e-139	Cytoplasmic tRNA 2-thiolation protein 1 OS=Drosophila erecta OX=7220 GN=GG10584 PE=3 SV=1	--	--	--	--	--	--	--	--	KOG2840	Uncharacterized conserved protein with similarity to predicted ATPase of the PP-loop superfamily
262	Cluster-11318.0	3065	2477782	XP_001943779.2	1837	2.2e-202	PREDICTED: uncharacterized protein LOC100163167 [Acyrthosiphon pisum]	XM_001943744.4	XM_001943744	2370	0	PREDICTED: Acyrthosiphon pisum uncharacterized LOC100163167 (LOC100163167), mRNA	--	--	--	--	--	--	--	--	PF13903//PF01708//PF10288	PMP-22/EMP/MP20/Claudin tight junction//Geminivirus putative movement protein//Cytoplasmic tRNA 2-thiolation protein 2	GO:0002098//GO:0034227//GO:0046740	tRNA wobble uridine modification//tRNA thio-modification//transport of virus in host, cell to cell	GO:0000049	tRNA binding	GO:0016021	integral component of membrane	--	--
263	Cluster-10042.0	697	8334247	XP_016656412.1	1155	5.9e-124	PREDICTED: DNA polymerase alpha subunit B [Acyrthosiphon pisum]	XM_016800923.1	XM_016800923	634	0	PREDICTED: Acyrthosiphon pisum DNA polymerase alpha subunit B (LOC100168132), transcript variant X2, mRNA	--	--	--	--	Q14181	200	1.2e-14	DNA polymerase alpha subunit B OS=Homo sapiens OX=9606 GN=POLA2 PE=1 SV=2	PF04042	DNA polymerase alpha/epsilon subunit B	GO:0006260	DNA replication	GO:0003887//GO:0003677	DNA-directed DNA polymerase activity//DNA binding	GO:0042575	DNA polymerase complex	--	--
264	Cluster-3132.0	515	2476642	XP_003244623.1	244	1.9e-18	PREDICTED: uncharacterized protein LOC100571841 [Acyrthosiphon pisum]	--	--	--	--	--	--	--	--	--	--	--	--	--	--	--	--	--	--	--	--	--	--	--
265	Cluster-3132.1	484	--	--	--	--	--	AP012217.1	AP012217	39	5.65e-09	Kluyveromyces marxianus DMKU3-1042 DNA, complete genome, chromosome 5	--	--	--	--	--	--	--	--	PF05326//PF09172	Seminal vesicle autoantigen (SVA)//Domain of unknown function (DUF1943)	GO:0006869	lipid transport	GO:0005319	lipid transporter activity	GO:0005576	extracellular region	--	--
266	Cluster-3959.2658	915	--	--	--	--	--	XM_008187580.2	XM_008187580	697	0	PREDICTED: Acyrthosiphon pisum acetylcholinesterase (LOC100169250), transcript variant X2, mRNA	--	--	--	--	--	--	--	--	--	--	--	--	--	--	--	--	--	--
267	Cluster-9325.0	812	--	--	--	--	--	XM_016805189.1	XM_016805189	326	2.8e-168	PREDICTED: Acyrthosiphon pisum sugar transporter ERD6-like 7 (LOC100165328), transcript variant X4, mRNA	--	--	--	--	--	--	--	--	--	--	--	--	--	--	--	--	--	--
268	Cluster-9325.1	1642	2477045	XP_001947160.2	1204	2.9e-129	PREDICTED: sugar transporter ERD6-like 7 isoform X2 [Acyrthosiphon pisum]	XM_001947125.4	XM_001947125	679	0	PREDICTED: Acyrthosiphon pisum sugar transporter ERD6-like 7 (LOC100165328), transcript variant X2, mRNA	--	--	--	--	Q93YP9	191	3.2e-13	Sugar transporter ERD6-like 4 OS=Arabidopsis thaliana OX=3702 GN=At1g19450 PE=2 SV=1	PF00083//PF07690	Sugar (and other) transporter//Major Facilitator Superfamily	GO:0055085	transmembrane transport	GO:0022857	transmembrane transporter activity	GO:0016021	integral component of membrane	KOG0254	Predicted transporter (major facilitator superfamily)
269	Cluster-7545.0	391	10837968	XP_022193315.1	289	8.7e-24	uncharacterized protein LOC111051184 [Nilaparvata lugens]	--	--	--	--	--	--	--	--	--	--	--	--	--	PF01527//PF03118//PF01624	Transposase//Bacterial RNA polymerase, alpha chain C terminal domain//MutS domain I	GO:0006144//GO:0006298//GO:0006206//GO:0006313//GO:0006351	purine nucleobase metabolic process//mismatch repair//pyrimidine nucleobase metabolic process//transposition, DNA-mediated//transcription, DNA-templated	GO:0004803//GO:0003899//GO:0003677//GO:0030983//GO:0005524	transposase activity//DNA-directed RNA polymerase activity//DNA binding//mismatched DNA binding//ATP binding	GO:0005730	nucleolus	--	--
270	Cluster-9325.3	518	8341208	XP_016658388.1	185	1.3e-11	PREDICTED: uncharacterized protein LOC107883238 [Acyrthosiphon pisum]	XM_016802899.1	XM_016802899	121	1.59e-54	PREDICTED: Acyrthosiphon pisum uncharacterized LOC107883238 (LOC107883238), mRNA	--	--	--	--	--	--	--	--	--	--	--	--	--	--	--	--	--	--
271	Cluster-5382.0	391	7694844	XP_015366997.1	698	3.2e-71	PREDICTED: twitchin isoform X4 [Diuraphis noxia]	XM_016803945.1	XM_016803945	364	0	PREDICTED: Acyrthosiphon pisum twitchin (LOC100166119), transcript variant X14, mRNA	K12567	TTN	titin	http://www.genome.jp/dbget-bin/www_bget?ko:K12567	Q23551	350	2.7e-32	Twitchin OS=Caenorhabditis elegans OX=6239 GN=unc-22 PE=1 SV=3	PF16656//PF00041	Purple acid Phosphatase, N-terminal domain//Fibronectin type III domain	GO:0006771//GO:0019497	riboflavin metabolic process//hexachlorocyclohexane metabolic process	GO:0046872//GO:0003993//GO:0005515	metal ion binding//acid phosphatase activity//protein binding	--	--	KOG0613	Projectin/twitchin and related proteins
272	Cluster-8215.0	335	--	--	--	--	--	--	--	--	--	--	--	--	--	--	--	--	--	--	--	--	--	--	--	--	--	--	--	--
273	Cluster-5479.0	2823	2475104	XP_001950225.2	1948	2.7e-215	PREDICTED: serine..threonine-protein kinase NIM1 isoform X2 [Acyrthosiphon pisum]	XM_003242022.3	XM_003242022	1991	0	PREDICTED: Acyrthosiphon pisum serine/threonine-protein kinase NIM1 (LOC100162494), transcript variant X3, mRNA	K16310	NIM1	serine/threonine-protein kinase NIM1	http://www.genome.jp/dbget-bin/www_bget?ko:K16310	Q8IY84	818	1.1e-85	Serine/threonine-protein kinase NIM1 OS=Homo sapiens OX=9606 GN=NIM1K PE=1 SV=1	PF00069//PF07714//PF06293	Protein kinase domain//Protein tyrosine kinase//Lipopolysaccharide kinase (Kdo/WaaP) family	GO:0006468	protein phosphorylation	GO:0016773//GO:0005524//GO:0004672	phosphotransferase activity, alcohol group as acceptor//ATP binding//protein kinase activity	GO:0016020	membrane	KOG0583	Serine/threonine protein kinase
274	Cluster-10195.0	4765	4415191	XP_008183402.1	4287	0	PREDICTED: LOW QUALITY PROTEIN: liprin-alpha-1 [Acyrthosiphon pisum]	XM_008185180.2	XM_008185180	3734	0	PREDICTED: Acyrthosiphon pisum liprin-alpha-1 (LOC100162615), mRNA	--	--	--	--	Q8BSS9	1088	9e-117	Liprin-alpha-2 OS=Mus musculus OX=10090 GN=Ppfia2 PE=1 SV=2	PF13851//PF01544//PF07647//PF06810//PF00536//PF08702//PF01920//PF04048//PF02050	Growth-arrest specific micro-tubule binding//CorA-like Mg2+ transporter protein//SAM domain (Sterile alpha motif)//Phage minor structural protein GP20//SAM domain (Sterile alpha motif)//Fibrinogen alpha/beta chain family//Prefoldin subunit//Sec8 exocyst complex component specific domain//Flagellar FliJ protein	GO:0071973//GO:0030001//GO:0006457//GO:0006904//GO:0006935//GO:0030168//GO:0055085//GO:0051258//GO:0007165//GO:0048870//GO:0015031	bacterial-type flagellum-dependent cell motility//metal ion transport//protein folding//vesicle docking involved in exocytosis//chemotaxis//platelet activation//transmembrane transport//protein polymerization//signal transduction//cell motility//protein transport	GO:0005198//GO:0005102//GO:0046873//GO:0005515//GO:0051082//GO:0030674//GO:0003774	structural molecule activity//receptor binding//metal ion transmembrane transporter activity//protein binding//unfolded protein binding//protein binding, bridging//motor activity	GO:0000145//GO:0031514//GO:0016272//GO:0016020//GO:0009288//GO:0005577	exocyst//motile cilium//prefoldin complex//membrane//bacterial-type flagellum//fibrinogen complex	KOG0249	LAR-interacting protein and related proteins
275	Cluster-6679.0	342	4412346	XP_008178689.1	618	5.4e-62	PREDICTED: protein unc-13 homolog B isoform X1 [Acyrthosiphon pisum]	XM_008180471.2	XM_008180471	318	3.12e-164	PREDICTED: Acyrthosiphon pisum protein unc-13 homolog B (LOC100159009), transcript variant X4, mRNA	--	--	--	--	--	--	--	--	--	--	--	--	--	--	--	--	--	--
276	Cluster-11064.0	826	--	--	--	--	--	--	--	--	--	--	--	--	--	--	--	--	--	--	--	--	--	--	--	--	--	--	--	--
277	Cluster-9173.0	464	11659200	XP_023292592.1	189	4.1e-12	uncharacterized protein LOC111675939 [Lucilia cuprina]	CP013031.1	CP013031	464	0	Escherichia coli strain H1827/12, complete genome	--	--	--	--	P37613	578	1.2e-58	PanD regulatory factor OS=Escherichia coli (strain K12) OX=83333 GN=panZ PE=1 SV=1	PF13508//PF12568//PF13673//PF08445//PF00583	Acetyltransferase (GNAT) domain//Acetyltransferase (GNAT) domain//Acetyltransferase (GNAT) domain//FR47-like protein//Acetyltransferase (GNAT) family	GO:0042967	acyl-carrier-protein biosynthetic process	GO:0016747//GO:0008080	transferase activity, transferring acyl groups other than amino-acyl groups//N-acetyltransferase activity	--	--	--	--
278	Cluster-6784.0	583	10795982	XP_022159908.1	644	8.8e-65	exosome complex exonuclease RRP44 [Myzus persicae]	XM_015518909.1	XM_015518909	414	0	PREDICTED: Diuraphis noxia exosome complex exonuclease RRP44 (LOC107169232), mRNA	K12585	DIS3, RRP44	exosome complex exonuclease DIS3/RRP44	http://www.genome.jp/dbget-bin/www_bget?ko:K12585	Q9Y2L1	330	8.6e-30	Exosome complex exonuclease RRP44 OS=Homo sapiens OX=9606 GN=DIS3 PE=1 SV=2	--	--	--	--	--	--	--	--	KOG2102	Exosomal 3'-5' exoribonuclease complex, subunit Rrp44/Dis3
279	Cluster-1421.0	967	1167118	XP_001950330.1	1381	5.1e-150	PREDICTED: doublesex- and mab-3-related transcription factor A2-like [Acyrthosiphon pisum]	XM_001950295.4	XM_001950295	836	0	PREDICTED: Acyrthosiphon pisum doublesex- and mab-3-related transcription factor A2-like (LOC100167026), mRNA	--	--	--	--	Q5VZB9	257	4.2e-21	Doublesex- and mab-3-related transcription factor A1 OS=Homo sapiens OX=9606 GN=DMRTA1 PE=2 SV=1	PF00751	DM DNA binding domain	GO:0006355	regulation of transcription, DNA-templated	GO:0043565	sequence-specific DNA binding	--	--	KOG3815	Transcription factor Doublesex
280	Cluster-3884.0	1299	10803119	XP_022167815.1	371	9e-33	tigger transposable element-derived protein 4-like [Myzus persicae]	--	--	--	--	--	--	--	--	--	Q8IY51	154	4.9e-09	Tigger transposable element-derived protein 4 OS=Homo sapiens OX=9606 GN=TIGD4 PE=2 SV=2	PF03184	DDE superfamily endonuclease	--	--	GO:0003676	nucleic acid binding	--	--	--	--
281	Cluster-395.0	403	8335850	XP_016656853.1	508	3.6e-49	PREDICTED: uncharacterized protein LOC100574613 [Acyrthosiphon pisum]	XM_016801365.1	XM_016801365	320	2.88e-165	PREDICTED: Acyrthosiphon pisum uncharacterized LOC100574613 (LOC100574613), transcript variant X3, mRNA	--	--	--	--	--	--	--	--	--	--	--	--	--	--	--	--	--	--
282	Cluster-1866.0	1682	--	--	--	--	--	--	--	--	--	--	--	--	--	--	--	--	--	--	--	--	--	--	--	--	--	--	--	--
283	Cluster-10978.0	1160	7688535	XP_015367638.1	484	6.3e-46	PREDICTED: U6 snRNA-associated Sm-like protein LSm2, partial [Diuraphis noxia]	XM_001946961.3	XM_001946961	349	0	PREDICTED: Acyrthosiphon pisum U6 snRNA-associated Sm-like protein LSm2 (LOC100158887), mRNA	K12621	LSM2	U6 snRNA-associated Sm-like protein LSm2	http://www.genome.jp/dbget-bin/www_bget?ko:K12621	Q9Y333	441	2.3e-42	U6 snRNA-associated Sm-like protein LSm2 OS=Homo sapiens OX=9606 GN=LSM2 PE=1 SV=1	--	--	--	--	--	--	--	--	KOG3448	Predicted snRNP core protein
284	Cluster-1190.0	365	7562939	XP_015125324.1	472	4.9e-45	PREDICTED: nitrogen regulation protein NtrB-like [Diachasma alloeum]	CP013031.1	CP013031	365	0	Escherichia coli strain H1827/12, complete genome	--	--	--	--	P0AFB9	464	1.6e-45	DNA-binding transcriptional regulator NtrC OS=Escherichia coli O157:H7 OX=83334 GN=glnG PE=3 SV=1	PF00072	Response regulator receiver domain	GO:0000160	phosphorelay signal transduction system	--	--	--	--	--	--
285	Cluster-11515.0	665	8346628	XP_016659805.1	543	5.2e-53	PREDICTED: uncharacterized protein LOC100576033 [Acyrthosiphon pisum]	XM_016804316.1	XM_016804316	347	4.82e-180	PREDICTED: Acyrthosiphon pisum uncharacterized LOC100576033 (LOC100576033), mRNA	--	--	--	--	--	--	--	--	--	--	--	--	--	--	--	--	--	--
286	Cluster-5419.0	456	8333198	XP_016656063.1	252	2e-19	PREDICTED: uncharacterized protein LOC107882345 [Acyrthosiphon pisum]	--	--	--	--	--	--	--	--	--	--	--	--	--	--	--	--	--	--	--	--	--	--	--
287	Cluster-12975.0	458	8352133	XP_016664361.1	522	9.8e-51	PREDICTED: uncharacterized protein LOC107885270 [Acyrthosiphon pisum]	XM_016807996.1	XM_016807996	47	1.9e-13	PREDICTED: Acyrthosiphon pisum uncharacterized LOC107884906 (LOC107884906), transcript variant X2, mRNA	--	--	--	--	--	--	--	--	--	--	--	--	--	--	--	--	--	--
288	Cluster-4192.0	2248	1167544	XP_001950244.1	2775	2.0e-311	PREDICTED: putative fatty acyl-CoA reductase CG5065 isoform X2 [Acyrthosiphon pisum]	XM_001950209.4	XM_001950209	2057	0	PREDICTED: Acyrthosiphon pisum putative fatty acyl-CoA reductase CG5065 (LOC100166286), transcript variant X2, mRNA	K13356	FAR	fatty acyl-CoA reductase	http://www.genome.jp/dbget-bin/www_bget?ko:K13356	Q8MS59	1066	1.5e-114	Fatty acyl-CoA reductase wat OS=Drosophila melanogaster OX=7227 GN=wat PE=1 SV=1	PF03015//PF01370//PF01073//PF00666//PF01118	Male sterility protein//NAD dependent epimerase/dehydratase family//3-beta hydroxysteroid dehydrogenase/isomerase family//Cathelicidin//Semialdehyde dehydrogenase, NAD binding domain	GO:0008207//GO:0055114//GO:0006694//GO:0006952//GO:0008210//GO:0008209	C21-steroid hormone metabolic process//oxidation-reduction process//steroid biosynthetic process//defense response//estrogen metabolic process//androgen metabolic process	GO:0080019//GO:0016620//GO:0051287//GO:0003854//GO:0050662//GO:0003824//GO:0016616	fatty-acyl-CoA reductase (alcohol-forming) activity//oxidoreductase activity, acting on the aldehyde or oxo group of donors, NAD or NADP as acceptor//NAD binding//3-beta-hydroxy-delta5-steroid dehydrogenase activity//coenzyme binding//catalytic activity//oxidoreductase activity, acting on the CH-OH group of donors, NAD or NADP as acceptor	GO:0005576	extracellular region	KOG1221	Acyl-CoA reductase
289	Cluster-10443.0	344	--	--	--	--	--	--	--	--	--	--	--	--	--	--	--	--	--	--	--	--	--	--	--	--	--	--	--	--
290	Cluster-4799.0	500	--	--	--	--	--	XM_003247443.3	XM_003247443	422	0	PREDICTED: Acyrthosiphon pisum protein PFC0760c (LOC100572899), transcript variant X2, mRNA	--	--	--	--	--	--	--	--	PF00825	Ribonuclease P	GO:0051252//GO:0008033	regulation of RNA metabolic process//tRNA processing	GO:0004526//GO:0000049	ribonuclease P activity//tRNA binding	GO:0030677	ribonuclease P complex	--	--
291	Cluster-12116.0	323	--	--	--	--	--	--	--	--	--	--	--	--	--	--	--	--	--	--	--	--	--	--	--	--	--	--	--	--
292	Cluster-1441.0	521	--	--	--	--	--	--	--	--	--	--	--	--	--	--	--	--	--	--	--	--	--	--	--	--	--	--	--	--
293	Cluster-3219.0	500	3316877	ELU11817.1	248	6.3e-19	hypothetical protein CAPTEDRAFT_196680, partial [Capitella teleta]	CP015834.1	CP015834	497	0	Escherichia coli strain MS6198, complete genome	--	--	--	--	P03708	902	3.5e-96	Terminase, large subunit OS=Escherichia phage lambda OX=10710 GN=A PE=1 SV=1	PF01702	Queuine tRNA-ribosyltransferase	GO:0006400//GO:0008616	tRNA modification//queuosine biosynthetic process	GO:0008479	queuine tRNA-ribosyltransferase activity	--	--	--	--
294	Cluster-9646.0	721	1660373	NP_001156583.1	713	1.1e-72	deterin isoform 1 [Acyrthosiphon pisum]	NM_001163110.1	NM_001163110	585	0	Acyrthosiphon pisum deterin (Det), transcript variant 2, mRNA	K08731	BIRC5	baculoviral IAP repeat-containing protein 5	http://www.genome.jp/dbget-bin/www_bget?ko:K08731	Q9JHY7	194	6.3e-14	Baculoviral IAP repeat-containing protein 5 OS=Rattus norvegicus OX=10116 GN=Birc5 PE=2 SV=1	PF04414	D-aminoacyl-tRNA deacylase	--	--	GO:0016788//GO:0051499	hydrolase activity, acting on ester bonds//D-aminoacyl-tRNA deacylase activity	--	--	KOG1101	Apoptosis inhibitor IAP1 and related BIR domain proteins
295	Cluster-1170.0	1563	4413883	XP_008181267.1	705	2e-71	PREDICTED: nudC domain-containing protein 2 isoform X1 [Acyrthosiphon pisum]	XM_008183045.2	XM_008183045	461	0	PREDICTED: Acyrthosiphon pisum nudC domain-containing protein 2 (Nudcd2), transcript variant X1, mRNA	--	--	--	--	Q8WVJ2	249	5.7e-20	NudC domain-containing protein 2 OS=Homo sapiens OX=9606 GN=NUDCD2 PE=1 SV=1	PF03193	Protein of unknown function, DUF258	--	--	GO:0005525//GO:0003924	GTP binding//GTPase activity	--	--	KOG2265	Nuclear distribution protein NUDC
296	Cluster-4273.1	3805	2477306	XP_001946474.2	3729	0	PREDICTED: rho GTPase-activating protein 18 [Acyrthosiphon pisum]	XM_001946439.4	XM_001946439	2793	0	PREDICTED: Acyrthosiphon pisum rho GTPase-activating protein 18 (LOC100166061), transcript variant X1, mRNA	--	--	--	--	Q8T0G4	627	2e-63	Rho GTPase-activating protein conundrum OS=Drosophila melanogaster OX=7227 GN=conu PE=1 SV=1	PF00957//PF00620	Synaptobrevin//RhoGAP domain	GO:0007165//GO:0016192	signal transduction//vesicle-mediated transport	--	--	GO:0016021	integral component of membrane	--	--
297	Cluster-3953.0	1162	4417762	XP_008187809.1	1097	5.3e-117	PREDICTED: uncharacterized protein LOC100163122 isoform X1 [Acyrthosiphon pisum]	XM_008189587.2	XM_008189587	866	0	PREDICTED: Acyrthosiphon pisum uncharacterized LOC100163122 (LOC100163122), transcript variant X1, mRNA	--	--	--	--	--	--	--	--	--	--	--	--	--	--	--	--	--	--
298	Cluster-6665.0	2479	4416699	XP_008186047.1	1913	2.7e-211	PREDICTED: coiled-coil domain-containing protein 102A isoform X2 [Acyrthosiphon pisum]	XM_016806877.1	XM_016806877	1320	0	PREDICTED: Acyrthosiphon pisum coiled-coil domain-containing protein 102A (LOC100571784), transcript variant X3, mRNA	K16759	CCDC102A	coiled-coil domain-containing protein 102A	http://www.genome.jp/dbget-bin/www_bget?ko:K16759	Q6DFL0	367	1.9e-33	Coiled-coil domain-containing protein 102A OS=Xenopus laevis OX=8355 GN=ccdc102a PE=2 SV=1	PF00123//PF10473//PF01576//PF00038//PF04111//PF13851//PF04508	Peptide hormone//Leucine-rich repeats of kinetochore protein Cenp-F/LEK1//Myosin tail//Intermediate filament protein//Autophagy protein Apg6//Growth-arrest specific micro-tubule binding//Viral A-type inclusion protein repeat	GO:0007165//GO:0048870//GO:0006914//GO:0016032	signal transduction//cell motility//autophagy//viral process	GO:0042803//GO:0003774//GO:0005179//GO:0008134//GO:0045502//GO:0005198	protein homodimerization activity//motor activity//hormone activity//transcription factor binding//dynein binding//structural molecule activity	GO:0030286//GO:0005882//GO:0031514//GO:0005576//GO:0016459//GO:0005667	dynein complex//intermediate filament//motile cilium//extracellular region//myosin complex//transcription factor complex	--	--
299	Cluster-10181.0	2599	2474018	XP_003240036.1	1966	2e-217	PREDICTED: uncharacterized protein LOC100571160 [Acyrthosiphon pisum]	XM_003239988.3	XM_003239988	1728	0	PREDICTED: Acyrthosiphon pisum uncharacterized LOC100571160 (LOC100571160), mRNA	--	--	--	--	--	--	--	--	PF16320	Ribosomal protein L7/L12 dimerisation domain	GO:0006412//GO:0042254	translation//ribosome biogenesis	GO:0003735	structural constituent of ribosome	GO:0005840//GO:0005622	ribosome//intracellular	--	--
300	Cluster-2622.0	4526	2477905	XP_001944238.2	3256	0	PREDICTED: cationic amino acid transporter 2 [Acyrthosiphon pisum]	XM_001944203.4	XM_001944203	2612	0	PREDICTED: Acyrthosiphon pisum cationic amino acid transporter 2 (LOC100169358), mRNA	K13871	SLC7A14	solute carrier family 7 (cationic amino acid transporter), member 14	http://www.genome.jp/dbget-bin/www_bget?ko:K13871	B0UYF2	1142	4.7e-123	Probable cationic amino acid transporter OS=Danio rerio OX=7955 GN=slc7a14a PE=3 SV=1	PF00324//PF13520	Amino acid permease//Amino acid permease	GO:0055085//GO:0006810//GO:0003333//GO:0006865	transmembrane transport//transport//amino acid transmembrane transport//amino acid transport	GO:0015171	amino acid transmembrane transporter activity	GO:0016020	membrane	KOG1286	Amino acid transporters
301	Cluster-5196.0	2386	4412820	XP_008179492.1	2749	3e-308	PREDICTED: general transcription factor IIH subunit 1 [Acyrthosiphon pisum]	XM_008181270.2	XM_008181270	2148	0	PREDICTED: Acyrthosiphon pisum general transcription factor IIH subunit 1 (LOC100169646), transcript variant X1, mRNA	K03141	TFIIH1, GTF2H1, TFB1	transcription initiation factor TFIIH subunit 1	http://www.genome.jp/dbget-bin/www_bget?ko:K03141	Q960E8	1117	1.9e-120	General transcription factor IIH subunit 1 OS=Drosophila melanogaster OX=7227 GN=Tfb1 PE=2 SV=1	--	--	--	--	--	--	--	--	KOG2074	RNA polymerase II transcription initiation/nucleotide excision repair factor TFIIH, subunit TFB1
302	Cluster-3959.1629	1849	4415690	XP_008184262.1	1624	6.5e-178	PREDICTED: geranylgeranyl pyrophosphate synthase [Acyrthosiphon pisum]	XM_008186040.1	XM_008186040	1560	0	PREDICTED: Acyrthosiphon pisum geranylgeranyl pyrophosphate synthase (LOC100161650), mRNA	K00804	GGPS1	geranylgeranyl diphosphate synthase, type III	http://www.genome.jp/dbget-bin/www_bget?ko:K00804	P56966	970	1.7e-103	Geranylgeranyl pyrophosphate synthase OS=Bos taurus OX=9913 GN=GGPS1 PE=1 SV=2	PF03936//PF00348	Terpene synthase family, metal binding domain//Polyprenyl synthetase	GO:0008299	isoprenoid biosynthetic process	GO:0010333//GO:0000287//GO:0016829	terpene synthase activity//magnesium ion binding//lyase activity	--	--	KOG0776	Geranylgeranyl pyrophosphate synthase/Polyprenyl synthetase
303	Cluster-3959.1628	2601	7700195	XP_015372951.1	649	1e-64	PREDICTED: uncharacterized protein LOC107168151 [Diuraphis noxia]	XM_001951623.4	XM_001951623	2013	0	PREDICTED: Acyrthosiphon pisum uncharacterized LOC100163560 (LOC100163560), mRNA	--	--	--	--	--	--	--	--	--	--	--	--	--	--	--	--	--	--
304	Cluster-3959.1627	2164	1166857	XP_001951533.1	1713	3.6e-188	PREDICTED: la protein homolog isoform X1 [Acyrthosiphon pisum]	XM_001951498.4	XM_001951498	1276	0	PREDICTED: Acyrthosiphon pisum la protein homolog (LOC100165369), transcript variant X1, mRNA	K11090	LA, SSB	lupus La protein	http://www.genome.jp/dbget-bin/www_bget?ko:K11090	P40796	397	5.4e-37	La protein homolog OS=Drosophila melanogaster OX=7227 GN=La PE=1 SV=2	PF00076//PF04800	RNA recognition motif. (a.k.a. RRM, RBD, or RNP domain)//ETC complex I subunit conserved region	GO:0022900	electron transport chain	GO:0016651//GO:0003676	oxidoreductase activity, acting on NAD(P)H//nucleic acid binding	--	--	KOG0118	FOG: RRM domain
305	Cluster-3959.1626	2386	1168100	XP_001943395.1	3391	0	PREDICTED: glucose dehydrogenase [FAD, quinone]-like [Acyrthosiphon pisum]	XM_001943360.4	XM_001943360	2007	0	PREDICTED: Acyrthosiphon pisum glucose dehydrogenase [FAD, quinone]-like (LOC100158867), mRNA	--	--	--	--	P18172	609	1.6e-61	Glucose dehydrogenase [FAD, quinone] OS=Drosophila pseudoobscura pseudoobscura OX=46245 GN=Gld PE=3 SV=4	PF02558//PF05834//PF05199//PF07992//PF01266//PF00732	Ketopantoate reductase PanE/ApbA//Lycopene cyclase protein//GMC oxidoreductase//Pyridine nucleotide-disulphide oxidoreductase//FAD dependent oxidoreductase//GMC oxidoreductase	GO:0015940//GO:0055114//GO:0016117	pantothenate biosynthetic process//oxidation-reduction process//carotenoid biosynthetic process	GO:0008677//GO:0016491//GO:0016614//GO:0016705//GO:0050660	2-dehydropantoate 2-reductase activity//oxidoreductase activity//oxidoreductase activity, acting on CH-OH group of donors//oxidoreductase activity, acting on paired donors, with incorporation or reduction of molecular oxygen//flavin adenine dinucleotide binding	--	--	--	--
306	Cluster-3959.1625	1489	8348926	XP_016661167.1	793	1.2e-81	PREDICTED: uncharacterized protein LOC100162203 [Acyrthosiphon pisum]	XM_016805676.1	XM_016805676	851	0	PREDICTED: Acyrthosiphon pisum uncharacterized LOC100162203 (LOC100162203), transcript variant X2, mRNA	--	--	--	--	Q9W1C9	315	1.2e-27	Ejaculatory bulb-specific protein 3 OS=Drosophila melanogaster OX=7227 GN=EbpIII PE=2 SV=2	--	--	--	--	--	--	--	--	--	--
307	Cluster-3959.1624	1692	--	--	--	--	--	--	--	--	--	--	--	--	--	--	--	--	--	--	PF01007	Inward rectifier potassium channel	GO:0006813	potassium ion transport	GO:0005242	inward rectifier potassium channel activity	GO:0016021//GO:0008076	integral component of membrane//voltage-gated potassium channel complex	--	--
308	Cluster-3959.1623	1635	--	--	--	--	--	--	--	--	--	--	--	--	--	--	--	--	--	--	--	--	--	--	--	--	--	--	--	--
309	Cluster-3959.1622	2449	7693069	XP_015365048.1	2082	6.7e-231	PREDICTED: phosphatidylinositol 4-phosphate 5-kinase type-1 alpha-like isoform X3 [Diuraphis noxia]	XR_119297.3	XR_119297	1296	0	PREDICTED: Acyrthosiphon pisum phosphatidylinositol 4-phosphate 5-kinase type-1 alpha pseudogene (LOC100575405), misc_RNA	K00889	PIP5K	1-phosphatidylinositol-4-phosphate 5-kinase	http://www.genome.jp/dbget-bin/www_bget?ko:K00889	P70182	1154	1e-124	Phosphatidylinositol 4-phosphate 5-kinase type-1 alpha OS=Mus musculus OX=10090 GN=Pip5k1a PE=1 SV=2	PF01504	Phosphatidylinositol-4-phosphate 5-Kinase	GO:0046488	phosphatidylinositol metabolic process	GO:0016307	phosphatidylinositol phosphate kinase activity	--	--	KOG0229	Phosphatidylinositol-4-phosphate 5-kinase
310	Cluster-3959.1621	647	10814114	XP_022179934.1	737	1.6e-75	40S ribosomal protein S16 [Myzus persicae]	NM_001162345.1	AK340188	599	0	Acyrthosiphon pisum 40S ribosomal protein S16-like (LOC100169216), mRNA >dbj|AK340188.1| Acyrthosiphon pisum ACYPI009856 mRNA, clone: 429A11, complete cds, full-insert cDNA sequence based on the ESTs (5'-EST:FF307613, 3'-EST:FF309459)	K02960	RP-S16e, RPS16	small subunit ribosomal protein S16e	http://www.genome.jp/dbget-bin/www_bget?ko:K02960	Q95V31	641	8.3e-66	40S ribosomal protein S16 OS=Spodoptera frugiperda OX=7108 GN=RpS16 PE=2 SV=1	PF00380	Ribosomal protein S9/S16	GO:0006412//GO:0042254	translation//ribosome biogenesis	GO:0003735	structural constituent of ribosome	GO:0005840	ribosome	KOG1753	40S ribosomal protein S16
311	Cluster-3959.1620	1194	1168819	XP_001951405.1	911	2e-95	PREDICTED: uncharacterized protein LOC100166545 [Acyrthosiphon pisum]	XM_001951370.4	XM_001951370	780	0	PREDICTED: Acyrthosiphon pisum uncharacterized LOC100166545 (LOC100166545), mRNA	--	--	--	--	--	--	--	--	--	--	--	--	--	--	--	--	--	--
312	Cluster-7202.0	3415	10686497	XP_021916597.1	2565	9.2e-287	DNA topoisomerase 2-like isoform X2 [Zootermopsis nevadensis]	XM_016808858.1	XM_016808858	3082	0	PREDICTED: Acyrthosiphon pisum DNA topoisomerase 2 (LOC100167074), transcript variant X3, mRNA	K03164	TOP2	DNA topoisomerase II	http://www.genome.jp/dbget-bin/www_bget?ko:K03164	O16140	2367	3.2e-265	DNA topoisomerase 2 OS=Bombyx mori OX=7091 GN=TOP2 PE=2 SV=1	PF09004//PF00521//PF00986	Domain of unknown function (DUF1891)//DNA gyrase/topoisomerase IV, subunit A//DNA gyrase B subunit, carboxyl terminus	GO:0055114//GO:0006265	oxidation-reduction process//DNA topological change	GO:0016706//GO:0003677//GO:0003918//GO:0008168//GO:0005524	oxidoreductase activity, acting on paired donors, with incorporation or reduction of molecular oxygen, 2-oxoglutarate as one donor, and incorporation of one atom each of oxygen into both donors//DNA binding//DNA topoisomerase type II (ATP-hydrolyzing) activity//methyltransferase activity//ATP binding	--	--	KOG0355	DNA topoisomerase type II
313	Cluster-9641.0	510	10793892	XP_022168409.1	408	1.8e-37	mediator of RNA polymerase II transcription subunit 21 [Myzus persicae]	XM_016805634.1	XM_016805634	377	0	PREDICTED: Acyrthosiphon pisum mediator of RNA polymerase II transcription subunit 21 (LOC100164653), transcript variant X2, mRNA	K15152	MED21, SRB7	mediator of RNA polymerase II transcription subunit 21	http://www.genome.jp/dbget-bin/www_bget?ko:K15152	Q16RX1	317	2.4e-28	Mediator of RNA polymerase II transcription subunit 21 OS=Aedes aegypti OX=7159 GN=MED21 PE=3 SV=1	--	--	--	--	--	--	--	--	KOG1510	RNA polymerase II holoenzyme and mediator subcomplex, subunit SURB7/SRB7
314	Cluster-1462.0	719	10815158	XP_022181080.1	396	6.3e-36	WAS..WASL-interacting protein family member 1-like [Myzus persicae]	XM_016806108.1	XM_016806108	535	0	PREDICTED: Acyrthosiphon pisum atrophin-1 (LOC100571051), transcript variant X2, mRNA	--	--	--	--	--	--	--	--	--	--	--	--	--	--	--	--	--	--
315	Cluster-5773.0	374	5428841	XP_011562874.1	625	9.1e-63	PREDICTED: ABC transporter F family member 3-like [Plutella xylostella]	CP012693.1	CP012693	374	0	Escherichia coli strain FORC_028, complete genome	K06158	ABCF3	ATP-binding cassette, subfamily F, member 3	http://www.genome.jp/dbget-bin/www_bget?ko:K06158	P63389	639	8.1e-66	Uncharacterized ABC transporter ATP-binding protein YheS OS=Escherichia coli (strain K12) OX=83333 GN=yheS PE=1 SV=1	PF00005//PF13304	ABC transporter//AAA domain, putative AbiEii toxin, Type IV TA system	--	--	GO:0016887//GO:0005524	ATPase activity//ATP binding	--	--	KOG0062	ATPase component of ABC transporters with duplicated ATPase domains/Translation elongation factor EF-3b
316	Cluster-3959.1833	713	10807365	XP_022172506.1	193	2.1e-12	cuticle protein 65-like [Myzus persicae]	XM_003240714.2	XM_003240714	613	0	PREDICTED: Acyrthosiphon pisum cuticle protein 65-like (LOC100575713), mRNA	--	--	--	--	--	--	--	--	PF01917	Archaebacterial flagellin	GO:0006928	movement of cell or subcellular component	GO:0005198	structural molecule activity	--	--	--	--
317	Cluster-6691.1	954	--	--	--	--	--	XM_008189856.2	XM_008189856	584	0	PREDICTED: Acyrthosiphon pisum titin (LOC100160459), mRNA	--	--	--	--	--	--	--	--	--	--	--	--	--	--	--	--	--	--
318	Cluster-7477.0	312	--	--	--	--	--	XM_016807378.1	XM_016807378	228	3.02e-114	PREDICTED: Acyrthosiphon pisum D(4) dopamine receptor (LOC100574950), mRNA	--	--	--	--	--	--	--	--	--	--	--	--	--	--	--	--	--	--
319	Cluster-11921.0	685	--	--	--	--	--	--	--	--	--	--	--	--	--	--	--	--	--	--	--	--	--	--	--	--	--	--	--	--
320	Cluster-4955.0	558	8334987	XP_016656637.1	392	1.4e-35	PREDICTED: solute carrier family 15 member 2 [Acyrthosiphon pisum]	XM_016801148.1	XM_016801148	334	6.74e-173	PREDICTED: Acyrthosiphon pisum solute carrier family 15 member 2 (LOC100572953), mRNA	--	--	--	--	--	--	--	--	--	--	--	--	--	--	--	--	--	--
321	Cluster-6169.0	2247	4412475	XP_008178874.1	2508	2.5e-280	PREDICTED: uncharacterized protein LOC100158785 isoform X1 [Acyrthosiphon pisum]	XM_008180652.2	XM_008180652	1877	0	PREDICTED: Acyrthosiphon pisum uncharacterized LOC100158785 (LOC100158785), transcript variant X1, mRNA	--	--	--	--	C9JJ37	254	2.2e-20	BTB/POZ domain-containing protein 19 OS=Homo sapiens OX=9606 GN=BTBD19 PE=2 SV=1	PF00651	BTB/POZ domain	--	--	GO:0005515	protein binding	--	--	--	--
322	Cluster-4474.0	1115	4416260	XP_008185283.1	983	8.3e-104	PREDICTED: protein D3 isoform X1 [Acyrthosiphon pisum]	XM_008187061.2	XM_008187061	754	0	PREDICTED: Acyrthosiphon pisum phosphatidylethanolamine-binding protein homolog F40A3.3 (LOC100162832), transcript variant X1, mRNA	--	--	--	--	O16264	453	9e-44	Phosphatidylethanolamine-binding protein homolog F40A3.3 OS=Caenorhabditis elegans OX=6239 GN=F40A3.3 PE=3 SV=1	--	--	--	--	--	--	--	--	KOG3346	Phosphatidylethanolamine binding protein
323	Cluster-10839.0	2113	1167841	XP_001949456.1	3188	0	PREDICTED: probable G-protein coupled receptor CG31760 [Acyrthosiphon pisum]	XM_001949421.4	XM_001949421	1808	0	PREDICTED: Acyrthosiphon pisum probable G-protein coupled receptor CG31760 (LOC100165101), mRNA	--	--	--	--	Q9VKA4	1119	1e-120	Probable G-protein coupled receptor CG31760 OS=Drosophila melanogaster OX=7227 GN=CG31760 PE=1 SV=3	PF04977//PF00003	Septum formation initiator//7 transmembrane sweet-taste receptor of 3 GCPR	GO:0007049//GO:0007186	cell cycle//G-protein coupled receptor signaling pathway	GO:0004930	G-protein coupled receptor activity	GO:0016021	integral component of membrane	--	--
324	Cluster-9565.1	450	8333576	XP_016656173.1	706	4.4e-72	PREDICTED: DNA polymerase eta-like isoform X2 [Acyrthosiphon pisum]	XM_016800684.1	XM_016800684	387	0	PREDICTED: Acyrthosiphon pisum DNA polymerase eta-like (LOC100165484), transcript variant X2, mRNA	--	--	--	--	--	--	--	--	--	--	--	--	--	--	--	--	--	--
325	Cluster-999.0	390	10811886	XP_022177478.1	682	2.3e-69	kinesin-like protein KIF18A isoform X1 [Myzus persicae]	XM_016808089.1	XM_016808089	369	0	PREDICTED: Acyrthosiphon pisum kinesin-like protein KIF18A (LOC100160022), transcript variant X3, mRNA	K10401	KIF18_19	kinesin family member 18/19	http://www.genome.jp/dbget-bin/www_bget?ko:K10401	Q5ZLK6	274	1.8e-23	Kinesin-like protein KIF18B OS=Gallus gallus OX=9031 GN=KIF18B PE=2 SV=1	PF00225	Kinesin motor domain	GO:0007018//GO:0007017	microtubule-based movement//microtubule-based process	GO:0008017//GO:0003777//GO:0005524	microtubule binding//microtubule motor activity//ATP binding	GO:0045298//GO:0005874	tubulin complex//microtubule	KOG0242	Kinesin-like protein
326	Cluster-5465.0	388	7689465	XP_015377287.1	172	3.2e-10	PREDICTED: cylicin-2-like [Diuraphis noxia]	XM_001946284.4	XM_001946284	304	2.17e-156	PREDICTED: Acyrthosiphon pisum cylicin-2-like (LOC100164442), mRNA	--	--	--	--	--	--	--	--	--	--	--	--	--	--	--	--	--	--
327	Cluster-1449.0	435	6369880	KOF92809.1	218	1.7e-15	hypothetical protein OCBIM_22005819mg [Octopus bimaculoides]	XM_003246046.3	XM_003246046	323	6.72e-167	PREDICTED: Acyrthosiphon pisum transcription factor hamlet (LOC100568506), mRNA	K09215	OSR, ODD	odd-skipped	http://www.genome.jp/dbget-bin/www_bget?ko:K09215	Q86V71	201	5.9e-15	Zinc finger protein 429 OS=Homo sapiens OX=9606 GN=ZNF429 PE=2 SV=2	PF01428//PF00096//PF08273//PF13465//PF01363//PF13912	AN1-like Zinc finger//Zinc finger, C2H2 type//Zinc-binding domain of primase-helicase//Zinc-finger double domain//FYVE zinc finger//C2H2-type zinc finger	GO:0006351//GO:0006269	transcription, DNA-templated//DNA replication, synthesis of RNA primer	GO:0004386//GO:0046872//GO:0003896//GO:0008270	helicase activity//metal ion binding//DNA primase activity//zinc ion binding	GO:0005730//GO:0005657	nucleolus//replication fork	--	--
328	Cluster-389.0	1749	7704495	XP_015377815.1	169	3.2e-09	PREDICTED: trehalase-like, partial [Diuraphis noxia]	--	--	--	--	--	--	--	--	--	--	--	--	--	--	--	--	--	--	--	--	--	--	--
329	Cluster-3959.1834	1215	1167985	XP_001949601.1	1758	1.2e-193	PREDICTED: 39S ribosomal protein L39, mitochondrial [Acyrthosiphon pisum]	AK340346.1	AK340346	1022	0	Acyrthosiphon pisum ACYPI002715 mRNA, clone: 131G23, complete cds, full-insert cDNA sequence based on the ESTs (5'-EST:EX604441, 3'-EST:EX605666)	K17420	MRPL39	large subunit ribosomal protein L39	http://www.genome.jp/dbget-bin/www_bget?ko:K17420	Q9VUJ0	792	4.8e-83	39S ribosomal protein L39, mitochondrial OS=Drosophila melanogaster OX=7227 GN=mRpL39 PE=1 SV=2	--	--	--	--	--	--	--	--	KOG1637	Threonyl-tRNA synthetase
330	Cluster-5046.0	1138	1624205	NP_001155819.1	1145	1.4e-122	uncharacterized protein LOC100169253 [Acyrthosiphon pisum]	NM_001162347.2	NM_001162347	888	0	Acyrthosiphon pisum CG3773-like (LOC100169253), mRNA	--	--	--	--	--	--	--	--	PF15328	Putative GRINL1B complex locus protein 2	--	--	--	--	GO:0016591	DNA-directed RNA polymerase II, holoenzyme	--	--
331	Cluster-11223.0	619	10808376	XP_022173597.1	169	1.1e-09	lutropin-choriogonadotropic hormone receptor-like isoform X1 [Myzus persicae]	XM_016803612.1	XM_016803612	416	0	PREDICTED: Acyrthosiphon pisum lutropin-choriogonadotropic hormone receptor-like (LOC100164576), mRNA	--	--	--	--	--	--	--	--	PF06667//PF10717	Phage shock protein B//Occlusion-derived virus envelope protein ODV-E18	GO:0006355//GO:0009271	regulation of transcription, DNA-templated//phage shock	--	--	GO:0019031	viral envelope	--	--
332	Cluster-10189.0	334	--	--	--	--	--	XM_001948256.4	XM_001948256	277	1.88e-141	PREDICTED: Acyrthosiphon pisum transmembrane protein 184B (LOC100166566), transcript variant X2, mRNA	--	--	--	--	--	--	--	--	--	--	--	--	--	--	--	--	--	--
333	Cluster-10986.0	568	4413538	XP_008180680.1	978	1.6e-103	PREDICTED: esterase E4 [Acyrthosiphon pisum]	XM_008182458.2	XM_008182458	508	0	PREDICTED: Acyrthosiphon pisum esterase E4 (LOC100573892), mRNA	--	--	--	--	--	--	--	--	--	--	--	--	--	--	--	--	--	--
334	Cluster-1850.0	1725	10806300	XP_022171330.1	197	1.8e-12	uncharacterized protein LOC111034413 [Myzus persicae]	--	--	--	--	--	--	--	--	--	--	--	--	--	--	--	--	--	--	--	--	--	--	--
335	Cluster-10369.0	563	2474059	XP_003240099.1	696	8e-71	PREDICTED: uncharacterized protein LOC100574472 [Acyrthosiphon pisum]	XM_003240051.3	XM_003240051	483	0	PREDICTED: Acyrthosiphon pisum uncharacterized LOC100574472 (LOC100574472), mRNA	--	--	--	--	Q2TBP7	163	1.9e-10	c-Myc-binding protein OS=Bos taurus OX=9913 GN=MYCBP PE=3 SV=3	--	--	--	--	--	--	--	--	--	--
336	Cluster-3959.2837	1325	2476823	XP_001949765.2	1158	5.1e-124	PREDICTED: prothoracicostatic peptide [Acyrthosiphon pisum]	XM_001949730.4	XM_001949730	1112	0	PREDICTED: Acyrthosiphon pisum prothoracicostatic peptide (LOC100166656), transcript variant X1, mRNA	--	--	--	--	P82003	295	2.2e-25	Prothoracicostatic peptide OS=Bombyx mori OX=7091 PE=1 SV=2	PF02008	CXXC zinc finger domain	--	--	GO:0008270//GO:0003677	zinc ion binding//DNA binding	--	--	--	--
337	Cluster-7787.0	393	--	--	--	--	--	--	--	--	--	--	--	--	--	--	--	--	--	--	--	--	--	--	--	--	--	--	--	--
338	Cluster-11731.1	1014	4417964	XP_008188121.1	758	9.3e-78	PREDICTED: lysine histidine transporter 1 isoform X1 [Acyrthosiphon pisum]	XM_001950186.4	XM_001950186	786	0	PREDICTED: Acyrthosiphon pisum lysine histidine transporter 1 (LOC100158713), transcript variant X2, mRNA	--	--	--	--	Q9SVG0	153	5e-09	Amino acid transporter AVT3C OS=Arabidopsis thaliana OX=3702 GN=AVT3C PE=1 SV=1	PF03188	Eukaryotic cytochrome b561	--	--	--	--	GO:0016021	integral component of membrane	--	--
339	Cluster-11731.0	1208	1168471	XP_001950221.1	1641	4.5e-180	PREDICTED: lysine histidine transporter 1 isoform X2 [Acyrthosiphon pisum]	XM_001950186.4	XM_001950186	1005	0	PREDICTED: Acyrthosiphon pisum lysine histidine transporter 1 (LOC100158713), transcript variant X2, mRNA	--	--	--	--	Q9LFE3	131	2.1e-06	Amino acid transporter AVT1H OS=Arabidopsis thaliana OX=3702 GN=AVT1H PE=3 SV=1	PF15320	mRNA cap methylation, RNMT-activating mini protein	GO:0032259	methylation	GO:0003723	RNA binding	GO:0005845	mRNA cap binding complex	--	--
340	Cluster-778.0	1877	--	--	--	--	--	--	--	--	--	--	--	--	--	--	--	--	--	--	--	--	--	--	--	--	--	--	--	--
341	Cluster-7119.0	1660	2477047	XP_003245183.1	1106	6.8e-118	PREDICTED: uncharacterized protein LOC100568704 [Acyrthosiphon pisum]	XM_003245135.3	XM_003245135	940	0	PREDICTED: Acyrthosiphon pisum uncharacterized LOC100568704 (LOC100568704), mRNA	K18171	CMC1	COX assembly mitochondrial protein 1	http://www.genome.jp/dbget-bin/www_bget?ko:K18171	Q5ZIN2	232	5.7e-18	tRNA-splicing endonuclease subunit Sen2 OS=Gallus gallus OX=9031 GN=TSEN2 PE=2 SV=1	PF02778//PF01974	tRNA intron endonuclease, N-terminal domain//tRNA intron endonuclease, catalytic C-terminal domain	GO:0051252//GO:0006388	regulation of RNA metabolic process//tRNA splicing, via endonucleolytic cleavage and ligation	GO:0000213	tRNA-intron endonuclease activity	GO:0000214	tRNA-intron endonuclease complex	KOG4624	Uncharacterized conserved protein
342	Cluster-2034.0	1391	10815164	XP_022181087.1	1829	8.3e-202	COBW domain-containing protein 1-like [Myzus persicae]	XM_016803844.1	XM_016803844	1184	0	PREDICTED: Acyrthosiphon pisum COBW domain-containing protein 1 (LOC100163415), transcript variant X4, mRNA	--	--	--	--	Q99MB4	892	1.4e-94	COBW domain-containing protein 1 OS=Rattus norvegicus OX=10116 GN=Cbwd1 PE=2 SV=2	PF00005//PF03193//PF00437//PF01637//PF06414//PF01926//PF02367//PF03205	ABC transporter//Protein of unknown function, DUF258//Type II/IV secretion system protein//Archaeal ATPase//Zeta toxin//50S ribosome-binding GTPase//Threonylcarbamoyl adenosine biosynthesis protein TsaE//Molybdopterin guanine dinucleotide synthesis protein B	GO:0002949//GO:0006777//GO:0006810	tRNA threonylcarbamoyladenosine modification//Mo-molybdopterin cofactor biosynthetic process//transport	GO:0016887//GO:0005524//GO:0003924//GO:0005525//GO:0016301	ATPase activity//ATP binding//GTPase activity//GTP binding//kinase activity	--	--	KOG2743	Cobalamin synthesis protein
343	Cluster-6605.0	469	8349510	XP_008185324.2	402	8.2e-37	PREDICTED: condensin complex subunit 1 [Acyrthosiphon pisum]	XM_008187102.2	XM_008187102	319	1.22e-164	PREDICTED: Acyrthosiphon pisum condensin complex subunit 1 (LOC100167899), mRNA	--	--	--	--	--	--	--	--	PF02666	Phosphatidylserine decarboxylase	GO:0006544//GO:0006566//GO:0008654//GO:0006563//GO:0046486	glycine metabolic process//threonine metabolic process//phospholipid biosynthetic process//L-serine metabolic process//glycerolipid metabolic process	GO:0004609	phosphatidylserine decarboxylase activity	--	--	--	--
344	Cluster-2747.0	511	8334559	XP_016656521.1	923	3.5e-97	PREDICTED: E3 ubiquitin-protein ligase MARCH2-like isoform X1 [Acyrthosiphon pisum]	XM_003241633.3	XM_003241633	492	0	PREDICTED: Acyrthosiphon pisum E3 ubiquitin-protein ligase MARCH2-like (LOC100569384), transcript variant X5, mRNA	--	--	--	--	Q99M02	159	5.1e-10	E3 ubiquitin-protein ligase MARCH2 OS=Mus musculus OX=10090 GN=March2 PE=2 SV=1	PF12906//PF13639//PF00693//PF12678	RING-variant domain//Ring finger domain//Thymidine kinase from herpesvirus//RING-H2 zinc finger	GO:0006206//GO:0006230	pyrimidine nucleobase metabolic process//TMP biosynthetic process	GO:0004797//GO:0005524//GO:0005515//GO:0008270	thymidine kinase activity//ATP binding//protein binding//zinc ion binding	--	--	KOG1609	Protein involved in mRNA turnover and stability
345	Cluster-11795.0	1032	--	--	--	--	--	--	--	--	--	--	--	--	--	--	--	--	--	--	PF03100	CcmE	GO:0017003//GO:0017004	protein-heme linkage//cytochrome complex assembly	--	--	GO:0005886	plasma membrane	--	--
346	Cluster-7177.0	2508	4417558	XP_008187463.1	2382	1.1e-265	PREDICTED: wee1-like protein kinase [Acyrthosiphon pisum]	XM_008189241.2	XM_008189241	2125	0	PREDICTED: Acyrthosiphon pisum wee1-like protein kinase (LOC100159593), transcript variant X1, mRNA	K06632	WEE1	wee1-like protein kinase	http://www.genome.jp/dbget-bin/www_bget?ko:K06632	Q63802	548	2e-54	Wee1-like protein kinase OS=Rattus norvegicus OX=10116 GN=Wee1 PE=1 SV=1	PF00069//PF07714//PF02912	Protein kinase domain//Protein tyrosine kinase//Aminoacyl tRNA synthetase class II, N-terminal domain	GO:0006571//GO:0000162//GO:0006432//GO:0006468//GO:0009094	tyrosine biosynthetic process//tryptophan biosynthetic process//phenylalanyl-tRNA aminoacylation//protein phosphorylation//L-phenylalanine biosynthetic process	GO:0000166//GO:0004672//GO:0005524//GO:0004826	nucleotide binding//protein kinase activity//ATP binding//phenylalanine-tRNA ligase activity	GO:0005737//GO:0009328	cytoplasm//phenylalanine-tRNA ligase complex	KOG0601	Cyclin-dependent kinase WEE1
347	Cluster-5921.0	776	--	--	--	--	--	--	--	--	--	--	--	--	--	--	--	--	--	--	--	--	--	--	--	--	--	--	--	--
348	Cluster-13024.0	377	--	--	--	--	--	AC202222.3	AC202222	215	6.28e-107	Acyrthosiphon pisum BAC VMRC38-10-A8 (Benaroya Research Institute VMRC38 Acrythosiphon pisum (Pea Aphid) BAC library) complete sequence	--	--	--	--	--	--	--	--	--	--	--	--	--	--	--	--	--	--
349	Cluster-4549.0	429	3716996	ERL95962.1	589	1.6e-58	hypothetical protein D910_00694, partial [Dendroctonus ponderosae]	LT632320.1	LT632320	429	0	Escherichia coli strain NCTC 13441 genome assembly, chromosome: 1	K02358	tuf, TUFM	elongation factor Tu	http://www.genome.jp/dbget-bin/www_bget?ko:K02358	A8A779	621	1.1e-63	Elongation factor Tu 2 OS=Escherichia coli O9:H4 (strain HS) OX=331112 GN=tuf2 PE=3 SV=1	PF03144	Elongation factor Tu domain 2	--	--	GO:0005525	GTP binding	--	--	KOG0460	Mitochondrial translation elongation factor Tu
350	Cluster-9785.0	906	8349602	XP_016661859.1	1103	8.3e-118	PREDICTED: putative ATP-dependent RNA helicase TDRD12 [Acyrthosiphon pisum]	XM_016806370.1	XM_016806370	583	0	PREDICTED: Acyrthosiphon pisum putative ATP-dependent RNA helicase TDRD12 (LOC100161858), mRNA	--	--	--	--	--	--	--	--	PF07975	TFIIH C1-like domain	GO:0006281	DNA repair	GO:0008270	zinc ion binding	--	--	--	--
351	Cluster-9454.0	689	10806954	XP_022172056.1	884	1.6e-92	nuclear cap-binding protein subunit 2-like [Myzus persicae]	NM_001162110.2	NM_001162110	518	0	Acyrthosiphon pisum nuclear cap-binding protein subunit 2-like (LOC100163642), mRNA	K12883	NCBP2, CBP20	nuclear cap-binding protein subunit 2	http://www.genome.jp/dbget-bin/www_bget?ko:K12883	Q1HE01	655	2.1e-67	Nuclear cap-binding protein subunit 2 OS=Bombyx mori OX=7091 PE=2 SV=1	PF00076//PF01876	RNA recognition motif. (a.k.a. RRM, RBD, or RNP domain)//RNase P subunit p30	GO:0051252//GO:0008033	regulation of RNA metabolic process//tRNA processing	GO:0003676//GO:0004540	nucleic acid binding//ribonuclease activity	--	--	KOG0121	Nuclear cap-binding protein complex, subunit CBP20 (RRM superfamily)
352	Cluster-3959.2832	1219	--	--	--	--	--	--	--	--	--	--	--	--	--	--	--	--	--	--	--	--	--	--	--	--	--	--	--	--
353	Cluster-7777.0	4783	10800806	XP_022165258.1	5703	0	serine..threonine-protein kinase 10 isoform X2 [Myzus persicae]	XM_008181147.2	XM_008181147	3714	0	PREDICTED: Acyrthosiphon pisum serine/threonine-protein kinase 10 (LOC100161351), mRNA	K08836	SLK	STE20-like kinase	http://www.genome.jp/dbget-bin/www_bget?ko:K08836	Q7SY52	1020	6.9e-109	Serine/threonine-protein kinase 10 OS=Danio rerio OX=7955 GN=stk10 PE=2 SV=1	PF07714//PF00069//PF12474	Protein tyrosine kinase//Protein kinase domain//Polo kinase kinase	GO:0016310//GO:0006468//GO:0009069	phosphorylation//protein phosphorylation//serine family amino acid metabolic process	GO:0004674//GO:0005524//GO:0004672	protein serine/threonine kinase activity//ATP binding//protein kinase activity	--	--	KOG0576	Mitogen-activated protein kinase kinase kinase kinase (MAP4K), germinal center kinase family
354	Cluster-8276.0	3571	10800359	XP_022164769.1	1385	6.5e-150	very-long-chain 3-oxoacyl-CoA reductase-like isoform X2 [Myzus persicae]	XM_003248172.3	XM_003248172	2621	0	PREDICTED: Acyrthosiphon pisum very-long-chain 3-oxoacyl-CoA reductase (LOC100167470), mRNA	K10251	HSD17B12, KAR, IFA38	17beta-estradiol 17-dehydrogenase / very-long-chain 3-oxoacyl-CoA reductase	http://www.genome.jp/dbget-bin/www_bget?ko:K10251	Q28IU1	519	6.4e-51	Very-long-chain 3-oxoacyl-CoA reductase OS=Xenopus tropicalis OX=8364 GN=hsd17b12 PE=2 SV=1	PF01370//PF00106	NAD dependent epimerase/dehydratase family//short chain dehydrogenase	GO:0008152	metabolic process	GO:0003824//GO:0050662//GO:0016491	catalytic activity//coenzyme binding//oxidoreductase activity	--	--	KOG1014	17 beta-hydroxysteroid dehydrogenase type 3, HSD17B3
355	Cluster-1399.0	1755	--	--	--	--	--	--	--	--	--	--	--	--	--	--	--	--	--	--	--	--	--	--	--	--	--	--	--	--
356	Cluster-5504.0	386	--	--	--	--	--	--	--	--	--	--	--	--	--	--	--	--	--	--	PF04650	YSIRK type signal peptide	--	--	--	--	GO:0016020	membrane	--	--
357	Cluster-7467.0	433	10793320	XP_022162027.1	603	3.7e-60	neuron navigator 2 isoform X1 [Myzus persicae]	XM_016800420.1	XM_016800420	397	0	PREDICTED: Acyrthosiphon pisum protein sickie (LOC100169531), transcript variant X6, mRNA	--	--	--	--	Q80TN7	233	1.1e-18	Neuron navigator 3 OS=Mus musculus OX=10090 GN=Nav3 PE=1 SV=2	PF00307	Calponin homology (CH) domain	--	--	GO:0005515	protein binding	--	--	--	--
358	Cluster-6510.0	395	10803313	XP_022168033.1	528	1.7e-51	ribonucleoprotein PTB-binding 1-like isoform X2 [Myzus persicae]	XM_003245861.3	XM_003245861	357	0	PREDICTED: Acyrthosiphon pisum ribonucleoprotein PTB-binding 1 (LOC100570926), transcript variant X2, mRNA	--	--	--	--	--	--	--	--	PF11722//PF00076	CCCH zinc finger in TRM13 protein//RNA recognition motif. (a.k.a. RRM, RBD, or RNP domain)	--	--	GO:0008168//GO:0003676	methyltransferase activity//nucleic acid binding	--	--	--	--
359	Cluster-4935.0	826	2477268	XP_001947533.2	1012	2.7e-107	PREDICTED: scavenger receptor class B member 1 [Acyrthosiphon pisum]	XM_001947498.4	XM_001947498	667	0	PREDICTED: Acyrthosiphon pisum scavenger receptor class B member 1 (LOC100169440), mRNA	K13885	SCARB1	scavenger receptor class B, member 1	http://www.genome.jp/dbget-bin/www_bget?ko:K13885	Q8SQC1	212	5.9e-16	Scavenger receptor class B member 1 OS=Sus scrofa OX=9823 GN=SCARB1 PE=2 SV=1	PF01130	CD36 family	GO:0007155	cell adhesion	--	--	GO:0016020	membrane	--	--
360	Cluster-6813.0	318	--	--	--	--	--	--	--	--	--	--	--	--	--	--	--	--	--	--	--	--	--	--	--	--	--	--	--	--
361	Cluster-7464.0	824	2474535	XP_003240967.1	918	2.1e-96	PREDICTED: PRELI domain-containing protein 2 isoform X1 [Acyrthosiphon pisum]	XM_003240919.3	XM_003240919	658	0	PREDICTED: Acyrthosiphon pisum PRELI domain-containing protein 2 (LOC100574808), transcript variant X1, mRNA	--	--	--	--	Q0VBB0	162	3.7e-10	PRELI domain-containing protein 2 OS=Mus musculus OX=10090 GN=Prelid2 PE=2 SV=1	--	--	--	--	--	--	--	--	--	--
362	Cluster-890.0	816	--	--	--	--	--	--	--	--	--	--	--	--	--	--	--	--	--	--	--	--	--	--	--	--	--	--	--	--
363	Cluster-4949.0	415	--	--	--	--	--	XM_001950167.4	XM_001950167	238	1.14e-119	PREDICTED: Acyrthosiphon pisum uncharacterized LOC100167291 (LOC100167291), mRNA	--	--	--	--	--	--	--	--	--	--	--	--	--	--	--	--	--	--
364	Cluster-4388.0	322	--	--	--	--	--	XM_008184553.2	XM_008184553	92	1.25e-38	PREDICTED: Acyrthosiphon pisum intraflagellar transport protein 20 homolog (LOC100165093), transcript variant X3, mRNA	--	--	--	--	--	--	--	--	--	--	--	--	--	--	--	--	--	--
365	Cluster-9258.0	871	--	--	--	--	--	--	--	--	--	--	--	--	--	--	--	--	--	--	--	--	--	--	--	--	--	--	--	--
366	Cluster-8715.0	321	--	--	--	--	--	--	--	--	--	--	--	--	--	--	--	--	--	--	--	--	--	--	--	--	--	--	--	--
367	Cluster-9530.1	709	--	--	--	--	--	XM_016803566.1	XM_016803566	360	0	PREDICTED: Acyrthosiphon pisum serine/threonine-protein kinase 32B-like (LOC100571736), mRNA	--	--	--	--	--	--	--	--	--	--	--	--	--	--	--	--	--	--
368	Cluster-3959.2820	1054	10814523	XP_022180377.1	876	2e-91	uncharacterized protein LOC111040683 [Myzus persicae]	NM_001293531.1	NM_001293531	644	0	Acyrthosiphon pisum adenine phosphoribosyltransferase-like (LOC100162276), mRNA	K00759	APRT, apt	adenine phosphoribosyltransferase	http://www.genome.jp/dbget-bin/www_bget?ko:K00759	Q5FSN7	387	3.8e-36	Adenine phosphoribosyltransferase OS=Gluconobacter oxydans (strain 621H) OX=290633 GN=apt PE=3 SV=1	PF00156	Phosphoribosyl transferase domain	GO:0009116	nucleoside metabolic process	--	--	--	--	KOG1712	Adenine phosphoribosyl transferases
369	Cluster-3959.2821	1321	10804599	XP_022169451.1	904	1.4e-94	max-like protein X [Myzus persicae]	NM_001293387.1	NM_001293387	970	0	Acyrthosiphon pisum max-like protein X (LOC100167235), mRNA	K09113	MLX	MAX-like protein X	http://www.genome.jp/dbget-bin/www_bget?ko:K09113	Q9UH92	461	1.3e-44	Max-like protein X OS=Homo sapiens OX=9606 GN=MLX PE=1 SV=2	PF00010	Helix-loop-helix DNA-binding domain	--	--	GO:0046983	protein dimerization activity	--	--	KOG3582	Mlx interactors and related transcription factors
370	Cluster-985.0	557	10799867	XP_022164213.1	467	2.8e-44	uncharacterized protein LOC111029507 [Myzus persicae]	--	--	--	--	--	--	--	--	--	--	--	--	--	PF02880	Phosphoglucomutase/phosphomannomutase, alpha/beta/alpha domain III	GO:0005975	carbohydrate metabolic process	GO:0016868	intramolecular transferase activity, phosphotransferases	--	--	--	--
371	Cluster-3959.2823	3636	8350560	XP_016662813.1	1217	2e-130	PREDICTED: serine..arginine repetitive matrix protein 2 isoform X1 [Acyrthosiphon pisum]	XM_008188350.2	XM_008188350	2557	0	PREDICTED: Acyrthosiphon pisum peptidyl-prolyl cis-trans isomerase G (LOC100163695), transcript variant X3, mRNA	K13172	SRRM2, SRM300	serine/arginine repetitive matrix protein 2	http://www.genome.jp/dbget-bin/www_bget?ko:K13172	--	--	--	--	PF05038	Cytochrome Cytochrome b558 alpha-subunit	--	--	GO:0020037	heme binding	--	--	--	--
372	Cluster-3959.2824	1543	10427843	BAX57177.1	1619	2.1e-177	phosphate carrier 1 [Acyrthosiphon pisum]	XM_008182168.2	XM_008182168	1257	0	PREDICTED: Acyrthosiphon pisum phosphate carrier protein, mitochondrial-like (LOC100161976), mRNA	K15102	SLC25A3, PHC, PIC	solute carrier family 25 (mitochondrial phosphate transporter), member 3	http://www.genome.jp/dbget-bin/www_bget?ko:K15102	Q5R7W2	1115	2.1e-120	Phosphate carrier protein, mitochondrial OS=Pongo abelii OX=9601 GN=SLC25A3 PE=2 SV=1	--	--	--	--	--	--	--	--	KOG0767	Mitochondrial phosphate carrier protein
373	Cluster-973.0	425	--	--	--	--	--	--	--	--	--	--	--	--	--	--	--	--	--	--	--	--	--	--	--	--	--	--	--	--
374	Cluster-3959.2826	1553	2478217	XP_001945619.2	1918	4.4e-212	PREDICTED: lysocardiolipin acyltransferase 1 isoform X2 [Acyrthosiphon pisum]	XM_001945584.4	XM_001945584	1028	0	PREDICTED: Acyrthosiphon pisum lysocardiolipin acyltransferase 1 (LOC100159955), transcript variant X4, mRNA	K13513	LCLAT1, AGPAT8	lysocardiolipin and lysophospholipid acyltransferase	http://www.genome.jp/dbget-bin/www_bget?ko:K13513	Q6UWP7	637	5.8e-65	Lysocardiolipin acyltransferase 1 OS=Homo sapiens OX=9606 GN=LCLAT1 PE=1 SV=1	PF01553	Acyltransferase	GO:0008152	metabolic process	GO:0016746	transferase activity, transferring acyl groups	--	--	KOG1505	Lysophosphatidic acid acyltransferase LPAAT and related acyltransferases
375	Cluster-3959.2827	2314	8343482	XP_016659039.1	2378	3e-265	PREDICTED: protein halfway isoform X1 [Acyrthosiphon pisum]	XM_003243739.3	XM_003243739	1561	0	PREDICTED: Acyrthosiphon pisum protein halfway (LOC100574587), transcript variant X2, mRNA	--	--	--	--	Q9W568	645	1e-65	Protein halfway OS=Drosophila melanogaster OX=7227 GN=hfw PE=1 SV=3	PF13855//PF02976	Leucine rich repeat//DNA mismatch repair enzyme MutH	--	--	GO:0004519//GO:0003677//GO:0005515	endonuclease activity//DNA binding//protein binding	--	--	--	--
376	Cluster-3959.2828	3525	6664087	XP_014216026.1	723	3.7e-73	serine..arginine-rich splicing factor 1B [Copidosoma floridanum]	FP927087.1	FP927087	1125	0	Acyrthosiphon pisum mRNA, clone: ACI0AAC1YN06, full-insert cDNA sequence based on ESTs (5'-EST:ACI0AAC1YN06AAM1, 3'-EST ACI0AAC1YN06NM1)	K12890	SFRS1_9	splicing factor, arginine/serine-rich 1/9	http://www.genome.jp/dbget-bin/www_bget?ko:K12890	Q5ZML3	620	1.2e-62	Serine/arginine-rich splicing factor 1 OS=Gallus gallus OX=9031 GN=SRSF1 PE=1 SV=3	PF00076//PF08777//PF13631//PF16367	RNA recognition motif. (a.k.a. RRM, RBD, or RNP domain)//RNA binding motif//Cytochrome b(N-terminal)/b6/petB//RNA recognition motif	GO:0006118	obsolete electron transport	GO:0003676//GO:0003723//GO:0016491//GO:0009055	nucleic acid binding//RNA binding//oxidoreductase activity//electron carrier activity	GO:0016020	membrane	KOG0105	Alternative splicing factor ASF/SF2 (RRM superfamily)
377	Cluster-3959.2829	956	8347866	XP_016660124.1	900	3e-94	PREDICTED: nucleoside diphosphate kinase 6 [Acyrthosiphon pisum]	XM_001944736.4	XM_001944736	578	0	PREDICTED: Acyrthosiphon pisum nucleoside diphosphate kinase 6 (LOC100168200), transcript variant X1, mRNA	K00940	ndk, NME	nucleoside-diphosphate kinase	http://www.genome.jp/dbget-bin/www_bget?ko:K00940	Q6DI51	454	5.9e-44	Nucleoside diphosphate kinase 6 OS=Danio rerio OX=7955 GN=nme6 PE=2 SV=1	PF00334	Nucleoside diphosphate kinase	GO:0006241//GO:0006165//GO:0006183//GO:0006144//GO:0006228//GO:0006206	CTP biosynthetic process//nucleoside diphosphate phosphorylation//GTP biosynthetic process//purine nucleobase metabolic process//UTP biosynthetic process//pyrimidine nucleobase metabolic process	GO:0004550	nucleoside diphosphate kinase activity	--	--	KOG0888	Nucleoside diphosphate kinase
378	Cluster-420.0	598	--	--	--	--	--	--	--	--	--	--	--	--	--	--	--	--	--	--	--	--	--	--	--	--	--	--	--	--
379	Cluster-8875.0	553	8350248	XP_016662502.1	543	4.3e-53	PREDICTED: uncharacterized protein LOC100159687 [Acyrthosiphon pisum]	XM_016807013.1	XM_016807013	322	3.13e-166	PREDICTED: Acyrthosiphon pisum uncharacterized LOC100159687 (LOC100159687), mRNA	--	--	--	--	--	--	--	--	--	--	--	--	--	--	--	--	--	--
380	Cluster-5034.0	715	--	--	--	--	--	--	--	--	--	--	--	--	--	--	--	--	--	--	--	--	--	--	--	--	--	--	--	--
381	Cluster-10717.0	1421	2477901	XP_001944045.2	1831	5e-202	PREDICTED: ATP-binding cassette sub-family G member 8 [Acyrthosiphon pisum]	XM_001944010.4	XM_001944010	1324	0	PREDICTED: Acyrthosiphon pisum ATP-binding cassette sub-family G member 8 (LOC100166928), mRNA	--	--	--	--	--	--	--	--	--	--	--	--	--	--	--	--	--	--
382	Cluster-3959.1551	450	10793006	XP_022179085.1	257	5.2e-20	40S ribosomal protein S28 [Myzus persicae]	AK340705.1	AK340705	407	0	Acyrthosiphon pisum mRNA, clone: 192M9, full-insert cDNA sequence based on the ESTs (5'-EST:EX650158, 3'-EST:EX650678)	K02979	RP-S28e, RPS28	small subunit ribosomal protein S28e	http://www.genome.jp/dbget-bin/www_bget?ko:K02979	Q9W334	244	6.2e-20	40S ribosomal protein S28 OS=Drosophila melanogaster OX=7227 GN=RpS28b PE=1 SV=2	PF01200	Ribosomal protein S28e	GO:0006412//GO:0042254	translation//ribosome biogenesis	GO:0003735	structural constituent of ribosome	GO:0005622//GO:0005840	intracellular//ribosome	KOG3502	40S ribosomal protein S28
383	Cluster-6230.0	400	4579133	CDW60499.1	700	2e-71	Pyruvate:ferredoxin oxidoreductase [Trichuris trichiura]	CP017979.1	CP017979	400	0	Escherichia coli str. K-12 substr. W3110 substrain ZK126 genome	--	--	--	--	P52647	700	7.4e-73	Probable pyruvate-flavodoxin oxidoreductase OS=Escherichia coli (strain K12) OX=83333 GN=ydbK PE=3 SV=2	--	--	--	--	--	--	--	--	--	--
384	Cluster-8524.0	407	4416549	XP_008185789.1	411	6.4e-38	PREDICTED: RNA-directed DNA polymerase from mobile element jockey-like [Acyrthosiphon pisum]	--	--	--	--	--	--	--	--	--	--	--	--	--	--	--	--	--	--	--	--	--	--	--
385	Cluster-2101.0	492	4581652	CDW57984.1	566	8.3e-56	Deoxyribodipyrimidine photo-lyase [Trichuris trichiura]	CP016546.1	CP016546	492	0	Escherichia coli strain O177:H21, complete genome	--	--	--	--	P00914	561	1.2e-56	Deoxyribodipyrimidine photo-lyase OS=Escherichia coli (strain K12) OX=83333 GN=phrB PE=1 SV=1	--	--	--	--	--	--	--	--	--	--
386	Cluster-9284.0	335	--	--	--	--	--	XM_001945330.4	XM_001945330	247	8.96e-125	PREDICTED: Acyrthosiphon pisum ABC transporter G family member 23 (LOC100159508), mRNA	--	--	--	--	--	--	--	--	--	--	--	--	--	--	--	--	--	--
387	Cluster-3279.0	708	11948714	PRD31009.1	356	2.7e-31	sucC [Nephila clavipes]	CP013031.1	CP013031	705	0	Escherichia coli strain H1827/12, complete genome	--	--	--	--	P0A837	485	1.1e-47	Succinate--CoA ligase [ADP-forming] subunit beta OS=Escherichia coli O6:H1 (strain CFT073 / ATCC 700928 / UPEC) OX=199310 GN=sucC PE=3 SV=1	--	--	--	--	--	--	--	--	KOG1447	GTP-specific succinyl-CoA synthetase, beta subunit
388	Cluster-5708.0	752	8349718	XP_016661975.1	931	6e-98	PREDICTED: uncharacterized protein LOC100571391 isoform X2 [Acyrthosiphon pisum]	XM_016806486.1	XM_016806486	680	0	PREDICTED: Acyrthosiphon pisum uncharacterized LOC100571391 (LOC100571391), transcript variant X2, mRNA	--	--	--	--	--	--	--	--	--	--	--	--	--	--	--	--	--	--
389	Cluster-1110.0	739	11515925	XP_022900236.1	319	5.5e-27	uncharacterized protein LOC111413475 [Onthophagus taurus]	--	--	--	--	--	--	--	--	--	--	--	--	--	--	--	--	--	--	--	--	--	--	--
390	Cluster-9876.0	968	--	--	--	--	--	--	--	--	--	--	--	--	--	--	--	--	--	--	--	--	--	--	--	--	--	--	--	--
391	Cluster-7614.0	1763	7697971	XP_015370476.1	1685	5.2e-185	PREDICTED: mitochondrial dimethyladenosine transferase 1 [Diuraphis noxia]	XM_003240985.3	XM_003240985	1050	0	PREDICTED: Acyrthosiphon pisum dimethyladenosine transferase 1, mitochondrial (LOC100160744), mRNA	K15266	TFB1M	dimethyladenosine transferase 1, mitochondrial	http://www.genome.jp/dbget-bin/www_bget?ko:K15266	Q2PG46	891	2.3e-94	Dimethyladenosine transferase 1, mitochondrial OS=Macaca fascicularis OX=9541 GN=TFB1M PE=2 SV=1	--	--	--	--	--	--	--	--	KOG0820	Ribosomal RNA adenine dimethylase
392	Cluster-5454.0	1743	10812884	XP_022178576.1	1737	4.8e-191	UNC93-like protein MFSD11 [Myzus persicae]	XM_008182560.1	XM_008182560	762	0	PREDICTED: Acyrthosiphon pisum UNC93-like protein MFSD11 (LOC100168255), mRNA	--	--	--	--	Q8BJ51	727	2.4e-75	UNC93-like protein MFSD11 OS=Mus musculus OX=10090 GN=Mfsd11 PE=1 SV=1	PF07690	Major Facilitator Superfamily	GO:0055085	transmembrane transport	--	--	GO:0016021	integral component of membrane	KOG3098	Uncharacterized conserved protein
393	Cluster-2686.0	505	10802296	XP_022166906.1	874	1.6e-91	dedicator of cytokinesis protein 9 [Myzus persicae]	XM_016806501.1	XM_016806501	480	0	PREDICTED: Acyrthosiphon pisum dedicator of cytokinesis protein 9 (LOC100163414), transcript variant X2, mRNA	--	--	--	--	Q9BZ29	342	3e-31	Dedicator of cytokinesis protein 9 OS=Homo sapiens OX=9606 GN=DOCK9 PE=1 SV=2	--	--	--	--	--	--	--	--	KOG1997	PH domain-containing protein
394	Cluster-6220.0	1962	4415864	XP_008184550.1	1672	1.9e-183	PREDICTED: LOW QUALITY PROTEIN: polymerase delta-interacting protein 2 [Acyrthosiphon pisum]	XM_008186328.2	XM_008186328	918	0	PREDICTED: Acyrthosiphon pisum polymerase delta-interacting protein 2 (LOC100158951), mRNA	K17809	POLDIP2	polymerase delta-interacting protein 2	http://www.genome.jp/dbget-bin/www_bget?ko:K17809	Q9Y2S7	1172	6.7e-127	Polymerase delta-interacting protein 2 OS=Homo sapiens OX=9606 GN=POLDIP2 PE=1 SV=1	PF08755	Hemimethylated DNA-binding protein YccV like	--	--	GO:0003677	DNA binding	--	--	KOG4408	Putative Mg2+ and Co2+ transporter CorD
395	Cluster-4401.0	583	--	--	--	--	--	--	--	--	--	--	--	--	--	--	--	--	--	--	--	--	--	--	--	--	--	--	--	--
396	Cluster-3541.0	2006	7697104	XP_015369511.1	1952	6.5e-216	PREDICTED: LIM..homeobox protein Lhx3 isoform X2 [Diuraphis noxia]	XM_015514025.1	XM_015514025	1483	0	PREDICTED: Diuraphis noxia LIM/homeobox protein Lhx3 (LOC107165676), transcript variant X2, mRNA	K09374	LHX3_4	LIM homeobox protein 3/4	http://www.genome.jp/dbget-bin/www_bget?ko:K09374	Q90421	853	6.7e-90	LIM/homeobox protein Lhx3 OS=Danio rerio OX=7955 GN=lhx3 PE=2 SV=1	PF05920//PF00412//PF00046	Homeobox KN domain//LIM domain//Homeobox domain	GO:0006355	regulation of transcription, DNA-templated	GO:0008270//GO:0003677	zinc ion binding//DNA binding	--	--	KOG4577	Transcription factor LIM3, contains LIM and HOX domains
397	Cluster-9016.0	2956	2478952	XP_003248076.1	1324	6.4e-143	PREDICTED: dentin sialophosphoprotein [Acyrthosiphon pisum]	XM_003248028.3	XM_003248028	2333	0	PREDICTED: Acyrthosiphon pisum dentin sialophosphoprotein (LOC100572668), mRNA	--	--	--	--	--	--	--	--	--	--	--	--	--	--	--	--	--	--
398	Cluster-9460.0	480	--	--	--	--	--	--	--	--	--	--	--	--	--	--	--	--	--	--	PF08027//PF03246	Albumin I chain b//Pneumovirus nucleocapsid protein	GO:0009405	pathogenesis	GO:0045735//GO:0003723	nutrient reservoir activity//RNA binding	GO:0019013	viral nucleocapsid	--	--
399	Cluster-6278.0	436	2477475	XP_001951117.2	753	1.5e-77	PREDICTED: chondroitin sulfate proteoglycan 4 [Acyrthosiphon pisum]	XM_001951082.4	XM_001951082	414	0	PREDICTED: Acyrthosiphon pisum chondroitin sulfate proteoglycan 4 (LOC100162584), mRNA	--	--	--	--	Q5H8B9	144	2.4e-08	FRAS1-related extracellular matrix protein 3 OS=Mus musculus OX=10090 GN=Frem3 PE=2 SV=2	--	--	--	--	--	--	--	--	--	--
400	Cluster-8347.0	1338	10793829	XP_022167765.1	1777	8.5e-196	DNA..RNA-binding protein KIN17 [Myzus persicae]	NM_001326658.1	NM_001326658	1190	0	Acyrthosiphon pisum DNA/RNA-binding protein KIN17 (LOC100166805), mRNA	K13102	KIN	DNA/RNA-binding protein KIN17	http://www.genome.jp/dbget-bin/www_bget?ko:K13102	O60870	842	8.4e-89	DNA/RNA-binding protein KIN17 OS=Homo sapiens OX=9606 GN=KIN PE=1 SV=2	--	--	--	--	--	--	--	--	KOG2837	Protein containing a U1-type Zn-finger and implicated in RNA splicing or processing
401	Cluster-8963.0	1984	8336015	XP_016656908.1	2107	6.9e-234	PREDICTED: U3 small nucleolar RNA-interacting protein 2 [Acyrthosiphon pisum]	XM_016801419.1	XM_016801419	1302	0	PREDICTED: Acyrthosiphon pisum U3 small nucleolar RNA-interacting protein 2 (LOC103308188), mRNA	K14793	RRP9	ribosomal RNA-processing protein 9	http://www.genome.jp/dbget-bin/www_bget?ko:K14793	Q91WM3	789	1.8e-82	U3 small nucleolar RNA-interacting protein 2 OS=Mus musculus OX=10090 GN=Rrp9 PE=1 SV=1	PF09596//PF00400	MamL-1 domain//WD domain, G-beta repeat	GO:0045944//GO:0007219	positive regulation of transcription from RNA polymerase II promoter//Notch signaling pathway	GO:0003713//GO:0005515	transcription coactivator activity//protein binding	GO:0016607//GO:0005667	nuclear speck//transcription factor complex	KOG0299	U3 snoRNP-associated protein (contains WD40 repeats)
402	Cluster-8171.0	1270	--	--	--	--	--	FP926844.1	FP926844	450	0	Acyrthosiphon pisum mRNA, clone: ACI0AAD16YD03, full-insert cDNA sequence based on ESTs (5'-EST:ACI0AAD16YD03AAM2, 3'-EST ACI2AAD2YN05BBM1)	--	--	--	--	--	--	--	--	--	--	--	--	--	--	--	--	--	--
403	Cluster-4923.0	2516	2474213	XP_001951407.2	3373	0	PREDICTED: armadillo repeat-containing protein 8 [Acyrthosiphon pisum]	XM_001951372.4	XM_001951372	2239	0	PREDICTED: Acyrthosiphon pisum armadillo repeat-containing protein 8 (LOC100163320), mRNA	--	--	--	--	Q2KI54	1635	1.8e-180	Armadillo repeat-containing protein 8 OS=Bos taurus OX=9913 GN=ARMC8 PE=2 SV=1	PF11698//PF01602//PF00514//PF02985	V-ATPase subunit H//Adaptin N terminal region//Armadillo/beta-catenin-like repeat//HEAT repeat	GO:0015991//GO:0006886//GO:0016192	ATP hydrolysis coupled proton transport//intracellular protein transport//vesicle-mediated transport	GO:0016820//GO:0005515	hydrolase activity, acting on acid anhydrides, catalyzing transmembrane movement of substances//protein binding	GO:0000221//GO:0030117	vacuolar proton-transporting V-type ATPase, V1 domain//membrane coat	KOG1293	Proteins containing armadillo/beta-catenin-like repeat
404	Cluster-527.0	4057	2474658	XP_001944760.2	1788	1.4e-196	PREDICTED: nuclear RNA export factor 1 [Acyrthosiphon pisum]	XM_001944725.4	XM_001944725	1803	0	PREDICTED: Acyrthosiphon pisum nuclear RNA export factor 1 (LOC100162037), mRNA	K14284	NXF, TAP, MEX67	nuclear RNA export factor	http://www.genome.jp/dbget-bin/www_bget?ko:K14284	Q9UBU9	264	2.7e-21	Nuclear RNA export factor 1 OS=Homo sapiens OX=9606 GN=NXF1 PE=1 SV=1	PF13855//PF00560//PF03943//PF02136//PF09162	Leucine rich repeat//Leucine Rich Repeat//TAP C-terminal domain//Nuclear transport factor 2 (NTF2) domain//Tap, RNA-binding	GO:0006406//GO:0006810//GO:0051028	mRNA export from nucleus//transport//mRNA transport	GO:0003723//GO:0005515	RNA binding//protein binding	GO:0005622//GO:0005737//GO:0005634	intracellular//cytoplasm//nucleus	KOG3763	mRNA export factor TAP/MEX67
405	Cluster-3440.0	2628	2477167	XP_003245365.1	3262	0	PREDICTED: uncharacterized protein LOC100571237 [Acyrthosiphon pisum]	XM_003245317.3	XM_003245317	1341	0	PREDICTED: Acyrthosiphon pisum uncharacterized LOC100571237 (LOC100571237), mRNA	--	--	--	--	--	--	--	--	PF00319//PF02985	SRF-type transcription factor (DNA-binding and dimerisation domain)//HEAT repeat	--	--	GO:0003677//GO:0046983//GO:0005515	DNA binding//protein dimerization activity//protein binding	--	--	--	--
406	Cluster-6226.7	365	--	--	--	--	--	XM_016802592.1	XM_016802592	179	6.23e-87	PREDICTED: Acyrthosiphon pisum serine/threonine-protein phosphatase 6 regulatory ankyrin repeat subunit A-like (LOC100162859), transcript variant X1, mRNA >ref|XM_008182546.2| PREDICTED: Acyrthosiphon pisum serine/threonine-protein phosphatase 6 regulatory ankyrin repeat subunit A-like (LOC100162859), transcript variant X2, mRNA	--	--	--	--	--	--	--	--	--	--	--	--	--	--	--	--	--	--
407	Cluster-9894.1	752	2477784	XP_001946812.2	658	2.7e-66	PREDICTED: tubulin polyglutamylase TTLL4 [Acyrthosiphon pisum]	XM_001946777.4	XM_001946777	579	0	PREDICTED: Acyrthosiphon pisum tubulin polyglutamylase TTLL4 (LOC100167599), mRNA	--	--	--	--	--	--	--	--	--	--	--	--	--	--	--	--	--	--
408	Cluster-9894.0	4104	2477784	XP_001946812.2	4171	0	PREDICTED: tubulin polyglutamylase TTLL4 [Acyrthosiphon pisum]	XM_001946777.4	XM_001946777	2671	0	PREDICTED: Acyrthosiphon pisum tubulin polyglutamylase TTLL4 (LOC100167599), mRNA	K16601	TTLL4	tubulin polyglutamylase TTLL4	http://www.genome.jp/dbget-bin/www_bget?ko:K16601	Q14679	1177	3.7e-127	Tubulin polyglutamylase TTLL4 OS=Homo sapiens OX=9606 GN=TTLL4 PE=1 SV=2	PF03133//PF02655	Tubulin-tyrosine ligase family//ATP-grasp domain	GO:0006464	cellular protein modification process	GO:0005524//GO:0046872	ATP binding//metal ion binding	--	--	KOG2157	Predicted tubulin-tyrosine ligase
409	Cluster-12671.0	325	--	--	--	--	--	--	--	--	--	--	--	--	--	--	--	--	--	--	--	--	--	--	--	--	--	--	--	--
410	Cluster-4587.0	419	4416076	XP_008184936.1	534	3.6e-52	PREDICTED: zinc finger protein OZF isoform X1 [Acyrthosiphon pisum]	XM_001947744.4	XM_001947744	202	1.18e-99	PREDICTED: Acyrthosiphon pisum zinc finger protein 436 (LOC100164840), mRNA	K09228	KRAB	KRAB domain-containing zinc finger protein	http://www.genome.jp/dbget-bin/www_bget?ko:K09228	Q4V348	344	1.5e-31	Zinc finger protein 658B OS=Homo sapiens OX=9606 GN=ZNF658B PE=2 SV=1	PF06689//PF01363//PF01428//PF05191//PF00096//PF13912//PF13465//PF02892//PF16622//PF16045	ClpX C4-type zinc finger//FYVE zinc finger//AN1-like Zinc finger//Adenylate kinase, active site lid//Zinc finger, C2H2 type//C2H2-type zinc finger//Zinc-finger double domain//BED zinc finger//zinc-finger C2H2-type//LisH	GO:0046034//GO:0006144	ATP metabolic process//purine nucleobase metabolic process	GO:0046983//GO:0046872//GO:0003677//GO:0004017//GO:0005515//GO:0008270	protein dimerization activity//metal ion binding//DNA binding//adenylate kinase activity//protein binding//zinc ion binding	--	--	--	--
411	Cluster-10592.0	598	--	--	--	--	--	--	--	--	--	--	--	--	--	--	--	--	--	--	--	--	--	--	--	--	--	--	--	--
412	Cluster-6970.0	1043	1624569	NP_001155601.1	650	3.2e-65	zinc finger HIT domain-containing protein 3-like [Acyrthosiphon pisum]	NM_001162129.1	AK341608	571	0	Acyrthosiphon pisum zinc finger HIT domain-containing protein 3-like (LOC100163951), mRNA >dbj|AK341608.1| Acyrthosiphon pisum ACYPI004999 mRNA, clone: 569E7, complete cds, full-insert cDNA sequence based on the ESTs (5'-EST:FF328770, 3'-EST:FF330612)	--	--	--	--	--	--	--	--	PF00569	Zinc finger, ZZ type	--	--	GO:0008270	zinc ion binding	--	--	--	--
413	Cluster-7998.0	1246	10810293	XP_022175726.1	1317	1.7e-142	protein gooseberry-like isoform X1 [Myzus persicae]	XM_016807055.1	XM_016807055	1025	0	PREDICTED: Acyrthosiphon pisum protein gooseberry (LOC100161564), transcript variant X2, mRNA	K09381	PAX3_7	paired box protein 3/7	http://www.genome.jp/dbget-bin/www_bget?ko:K09381	P06601	898	2.5e-95	Segmentation protein paired OS=Drosophila melanogaster OX=7227 GN=prd PE=1 SV=1	PF05920//PF00046//PF00292	Homeobox KN domain//Homeobox domain//'Paired box' domain	GO:0006355	regulation of transcription, DNA-templated	GO:0003677	DNA binding	--	--	KOG0849	Transcription factor PRD and related proteins, contain PAX and HOX domains
414	Cluster-7998.1	1498	4416791	XP_003246660.2	978	4.3e-103	PREDICTED: segmentation protein paired [Acyrthosiphon pisum]	XM_003246612.3	XM_003246612	1013	0	PREDICTED: Acyrthosiphon pisum segmentation protein paired (LOC100574183), mRNA	--	--	--	--	--	--	--	--	PF02159	Oestrogen receptor	GO:0043401//GO:0006355//GO:0007165	steroid hormone mediated signaling pathway//regulation of transcription, DNA-templated//signal transduction	GO:0005496//GO:0003677//GO:0030284	steroid binding//DNA binding//estrogen receptor activity	GO:0005634	nucleus	--	--
415	Cluster-1792.0	4508	2475463	XP_001948926.2	2207	4e-245	PREDICTED: uncharacterized protein LOC100165674 [Acyrthosiphon pisum]	XM_001948891.3	XM_001948891	710	0	PREDICTED: Acyrthosiphon pisum uncharacterized LOC100165674 (LOC100165674), mRNA	--	--	--	--	--	--	--	--	PF05485//PF14822//PF01220//PF07544//PF03838	THAP domain//Vasohibin//Dehydroquinase class II//RNA polymerase II transcription mediator complex subunit 9//Recombination protein U	GO:0006281//GO:0009094//GO:0006357//GO:0045765//GO:0000162//GO:0006571//GO:0006310	DNA repair//L-phenylalanine biosynthetic process//regulation of transcription from RNA polymerase II promoter//regulation of angiogenesis//tryptophan biosynthetic process//tyrosine biosynthetic process//DNA recombination	GO:0003855//GO:0003676//GO:0001104	3-dehydroquinate dehydratase activity//nucleic acid binding//RNA polymerase II transcription cofactor activity	GO:0005737//GO:0016592	cytoplasm//mediator complex	--	--
416	Cluster-7021.0	340	7693370	XP_015365384.1	456	3.2e-43	PREDICTED: longitudinals lacking protein, isoforms H..M..V-like isoform X11 [Diuraphis noxia]	XM_015509898.1	XM_015509898	201	3.4e-99	PREDICTED: Diuraphis noxia longitudinals lacking protein, isoform G-like (LOC107162837), transcript variant X11, mRNA	--	--	--	--	--	--	--	--	PF02892//PF00096//PF13465	BED zinc finger//Zinc finger, C2H2 type//Zinc-finger double domain	--	--	GO:0003677//GO:0046872	DNA binding//metal ion binding	--	--	--	--
417	Cluster-7278.0	329	--	--	--	--	--	--	--	--	--	--	--	--	--	--	--	--	--	--	--	--	--	--	--	--	--	--	--	--
418	Cluster-6115.0	1241	10805020	XP_022169910.1	1331	4.1e-144	pyridoxal phosphate homeostasis protein isoform X2 [Myzus persicae]	XM_008185225.2	XM_008185225	1008	0	PREDICTED: Acyrthosiphon pisum proline synthase co-transcribed bacterial homolog protein-like (LOC100169371), transcript variant X3, mRNA	K06997	yggS, PROSC	PLP dependent protein	http://www.genome.jp/dbget-bin/www_bget?ko:K06997	Q3T0G5	608	1.1e-61	Pyridoxal phosphate homeostasis protein OS=Bos taurus OX=9913 GN=PLPBP PE=2 SV=1	--	--	--	--	--	--	--	--	KOG3157	Proline synthetase co-transcribed protein
419	Cluster-10763.0	1538	8347256	XP_016659960.1	2098	5.9e-233	PREDICTED: uncharacterized ATP-dependent helicase C29A10.10c [Acyrthosiphon pisum]	XM_016804471.1	XM_016804471	1254	0	PREDICTED: Acyrthosiphon pisum uncharacterized ATP-dependent helicase C29A10.10c (LOC100572658), mRNA	--	--	--	--	--	--	--	--	PF00498	FHA domain	--	--	GO:0005515	protein binding	--	--	--	--
420	Cluster-6762.0	883	7705099	XP_015378510.1	1077	8.3e-115	PREDICTED: uncharacterized protein LOC107172728 [Diuraphis noxia]	--	--	--	--	--	--	--	--	--	--	--	--	--	PF01507	Phosphoadenosine phosphosulfate reductase family	GO:0008152	metabolic process	GO:0003824	catalytic activity	--	--	--	--
421	Cluster-1830.0	486	8349252	XP_016661504.1	725	3e-74	PREDICTED: ribosomal RNA processing protein 1 homolog [Acyrthosiphon pisum]	XM_016806015.1	XM_016806015	443	0	PREDICTED: Acyrthosiphon pisum ribosomal RNA processing protein 1 homolog (LOC100166799), transcript variant X2, mRNA	K14849	RRP1	ribosomal RNA-processing protein 1	http://www.genome.jp/dbget-bin/www_bget?ko:K14849	P56182	240	2e-19	Ribosomal RNA processing protein 1 homolog A OS=Homo sapiens OX=9606 GN=RRP1 PE=1 SV=1	PF11640//PF05997	Telomere-length maintenance and DNA damage repair//Nucleolar protein,Nop52	GO:0009069//GO:0016310//GO:0006364	serine family amino acid metabolic process//phosphorylation//rRNA processing	GO:0004674	protein serine/threonine kinase activity	GO:0030688	preribosome, small subunit precursor	KOG3911	Nucleolar protein NOP52/RRP1
422	Cluster-11235.0	3349	2475991	XP_001943786.2	2040	6.8e-226	PREDICTED: alpha-protein kinase 1 [Acyrthosiphon pisum]	XM_001943751.4	XM_001943751	1747	0	PREDICTED: Acyrthosiphon pisum alpha-protein kinase 1 (LOC100159519), mRNA	K12497	EGR3	early growth response protein 3	http://www.genome.jp/dbget-bin/www_bget?ko:K12497	Q9UII5	256	1.9e-20	Zinc finger protein 107 OS=Homo sapiens OX=9606 GN=ZNF107 PE=1 SV=1	PF03526//PF00096//PF05091//PF06459//PF13912//PF13465	Colicin E1 (microcin) immunity protein//Zinc finger, C2H2 type//Eukaryotic translation initiation factor 3 subunit 7 (eIF-3)//Ryanodine Receptor TM 4-6//C2H2-type zinc finger//Zinc-finger double domain	GO:0006874//GO:0030153//GO:0006816//GO:0006446//GO:0006955	cellular calcium ion homeostasis//bacteriocin immunity//calcium ion transport//regulation of translational initiation//immune response	GO:0005219//GO:0046872//GO:0015643//GO:0003743	ryanodine-sensitive calcium-release channel activity//metal ion binding//toxic substance binding//translation initiation factor activity	GO:0019814//GO:0005840//GO:0005737//GO:0016021//GO:0005852//GO:0005622	immunoglobulin complex//ribosome//cytoplasm//integral component of membrane//eukaryotic translation initiation factor 3 complex//intracellular	--	--
423	Cluster-11727.1	1519	7688143	XP_015363319.1	232	1.4e-16	PREDICTED: uncharacterized protein LOC107161424 [Diuraphis noxia]	XM_008181503.2	XM_008181503	201	1.64e-98	PREDICTED: Acyrthosiphon pisum uncharacterized LOC100575025 (LOC100575025), mRNA	--	--	--	--	--	--	--	--	PF16422	Transcription factor COE1 DNA-binding domain	--	--	GO:0003677	DNA binding	--	--	--	--
424	Cluster-1868.0	1729	4418067	XP_008188299.1	1693	6.1e-186	PREDICTED: methionine aminopeptidase 1D, mitochondrial [Acyrthosiphon pisum]	XM_008190077.2	XM_008190077	1317	0	PREDICTED: Acyrthosiphon pisum methionine aminopeptidase 1D, mitochondrial (LOC103310768), mRNA	K01265	map	methionyl aminopeptidase	http://www.genome.jp/dbget-bin/www_bget?ko:K01265	Q6UB28	693	2.1e-71	Methionine aminopeptidase 1D, mitochondrial OS=Homo sapiens OX=9606 GN=METAP1D PE=1 SV=1	--	--	--	--	--	--	--	--	KOG2738	Putative methionine aminopeptidase
425	Cluster-3456.0	796	--	--	--	--	--	--	--	--	--	--	--	--	--	--	--	--	--	--	--	--	--	--	--	--	--	--	--	--
426	Cluster-7305.0	380	--	--	--	--	--	--	--	--	--	--	--	--	--	--	--	--	--	--	--	--	--	--	--	--	--	--	--	--
427	Cluster-12125.0	3232	8333651	XP_016656189.1	3789	0	PREDICTED: spondin-1 isoform X3 [Acyrthosiphon pisum]	XM_016800700.1	XM_016800700	1979	0	PREDICTED: Acyrthosiphon pisum spondin-1 (LOC100159066), transcript variant X3, mRNA	--	--	--	--	Q9W770	793	9.8e-83	Spondin-1 OS=Gallus gallus OX=9031 GN=SPON1 PE=2 SV=1	--	--	--	--	--	--	--	--	KOG3539	Spondins, extracellular matrix proteins
428	Cluster-2193.0	454	5432880	XP_011567376.1	409	1.2e-37	PREDICTED: LOW QUALITY PROTEIN: carbamoyl-phosphate synthase large chain, chloroplastic [Plutella xylostella]	CP013031.1	CP013031	454	0	Escherichia coli strain H1827/12, complete genome	K11540	CAD	carbamoyl-phosphate synthase / aspartate carbamoyltransferase / dihydroorotase	http://www.genome.jp/dbget-bin/www_bget?ko:K11540	P0A6F2	416	7.1e-40	Carbamoyl-phosphate synthase small chain OS=Escherichia coli O157:H7 OX=83334 GN=carA PE=3 SV=1	--	--	--	--	--	--	--	--	KOG0370	Multifunctional pyrimidine synthesis protein CAD (includes carbamoyl-phophate synthetase, aspartate transcarbamylase, and glutamine amidotransferase)
429	Cluster-2948.0	353	--	--	--	--	--	--	--	--	--	--	--	--	--	--	--	--	--	--	--	--	--	--	--	--	--	--	--	--
430	Cluster-5284.0	415	2478297	XP_003247092.1	184	1.4e-11	PREDICTED: mitochondrial ornithine transporter 1-like [Acyrthosiphon pisum]	XM_003247044.3	XM_003247044	295	2.35e-151	PREDICTED: Acyrthosiphon pisum mitochondrial ornithine transporter 1-like (LOC100574101), mRNA	--	--	--	--	--	--	--	--	--	--	--	--	--	--	--	--	--	--
431	Cluster-6226.0	534	7703114	XP_015376232.1	645	6.2e-65	PREDICTED: protein deltex-like [Diuraphis noxia]	XM_008184533.2	XM_008184533	348	1.06e-180	PREDICTED: Acyrthosiphon pisum protein deltex (LOC100160891), transcript variant X3, mRNA	K06058	DTX	deltex	http://www.genome.jp/dbget-bin/www_bget?ko:K06058	Q23985	290	3.4e-25	Protein deltex OS=Drosophila melanogaster OX=7227 GN=dx PE=1 SV=2	--	--	--	--	--	--	--	--	--	--
432	Cluster-9812.0	359	--	--	--	--	--	--	--	--	--	--	--	--	--	--	--	--	--	--	--	--	--	--	--	--	--	--	--	--
433	Cluster-6905.0	1623	8350683	XP_016662941.1	1383	5e-150	PREDICTED: CD166 antigen [Acyrthosiphon pisum]	XM_016807452.1	XM_016807452	1142	0	PREDICTED: Acyrthosiphon pisum CD166 antigen (LOC100575319), transcript variant X2, mRNA	--	--	--	--	--	--	--	--	PF13895	Immunoglobulin domain	--	--	GO:0005515	protein binding	--	--	--	--
434	Cluster-6135.0	1760	7848453	XP_015589767.1	1593	2.4e-174	PREDICTED: probable pyruvate dehydrogenase E1 component subunit alpha, mitochondrial isoform X2 [Cephus cinctus]	XM_001949495.3	XM_001949495	1423	0	PREDICTED: Acyrthosiphon pisum probable pyruvate dehydrogenase E1 component subunit alpha, mitochondrial (LOC100167586), mRNA	K00161	PDHA, pdhA	pyruvate dehydrogenase E1 component alpha subunit	http://www.genome.jp/dbget-bin/www_bget?ko:K00161	P52899	1306	1.7e-142	Probable pyruvate dehydrogenase E1 component subunit alpha, mitochondrial OS=Caenorhabditis elegans OX=6239 GN=T05H10.6 PE=3 SV=1	PF00676//PF02775//PF13292	Dehydrogenase E1 component//Thiamine pyrophosphate enzyme, C-terminal TPP binding domain//1-deoxy-D-xylulose-5-phosphate synthase	GO:0006694//GO:0016114//GO:0008152	steroid biosynthetic process//terpenoid biosynthetic process//metabolic process	GO:0003824//GO:0030976//GO:0016624//GO:0008661	catalytic activity//thiamine pyrophosphate binding//oxidoreductase activity, acting on the aldehyde or oxo group of donors, disulfide as acceptor//1-deoxy-D-xylulose-5-phosphate synthase activity	--	--	KOG0225	Pyruvate dehydrogenase E1, alpha subunit
435	Cluster-1500.0	494	10810226	XP_022175652.1	767	4.1e-79	chromodomain-helicase-DNA-binding protein 7-like isoform X4 [Myzus persicae]	XM_016808726.1	XM_016808726	470	0	PREDICTED: Acyrthosiphon pisum chromodomain-helicase-DNA-binding protein 7 (LOC100164870), transcript variant X6, mRNA	K14437	CHD7	chromodomain-helicase-DNA-binding protein 7	http://www.genome.jp/dbget-bin/www_bget?ko:K14437	Q9HCK8	303	9.8e-27	Chromodomain-helicase-DNA-binding protein 8 OS=Homo sapiens OX=9606 GN=CHD8 PE=1 SV=5	PF08074	CHDCT2 (NUC038) domain	GO:0006355	regulation of transcription, DNA-templated	GO:0008270//GO:0003677//GO:0016818//GO:0005524	zinc ion binding//DNA binding//hydrolase activity, acting on acid anhydrides, in phosphorus-containing anhydrides//ATP binding	GO:0005634	nucleus	--	--
436	Cluster-6135.2	2162	2475661	XP_003243016.1	3034	0	PREDICTED: gamma-tubulin complex component 4 [Acyrthosiphon pisum]	XM_003242968.3	XM_003242968	1872	0	PREDICTED: Acyrthosiphon pisum gamma-tubulin complex component 4 (LOC100570521), mRNA	--	--	--	--	Q9D4F8	499	8.1e-49	Gamma-tubulin complex component 4 OS=Mus musculus OX=10090 GN=Tubgcp4 PE=1 SV=2	PF04130	Spc97 / Spc98 family	GO:0090063//GO:0000226	positive regulation of microtubule nucleation//microtubule cytoskeleton organization	--	--	GO:0000922//GO:0005815	spindle pole//microtubule organizing center	KOG2065	Gamma-tubulin ring complex protein
437	Cluster-6135.3	440	--	--	--	--	--	--	--	--	--	--	--	--	--	--	--	--	--	--	--	--	--	--	--	--	--	--	--	--
438	Cluster-6135.4	2818	2475353	XP_003242490.1	2346	1.9e-261	PREDICTED: glycogenin-1 isoform X2 [Acyrthosiphon pisum]	XM_003242442.3	XM_003242442	2232	0	PREDICTED: Acyrthosiphon pisum glycogenin-1 (LOC100164266), transcript variant X2, mRNA	K00750	GYG1, GYG2	glycogenin glucosyltransferase	http://www.genome.jp/dbget-bin/www_bget?ko:K00750	O08730	886	1.4e-93	Glycogenin-1 OS=Rattus norvegicus OX=10116 GN=Gyg1 PE=2 SV=4	PF01501//PF11051	Glycosyl transferase family 8//Mannosyltransferase putative	GO:0006486	protein glycosylation	GO:0016757	transferase activity, transferring glycosyl groups	--	--	KOG1950	Glycosyl transferase, family 8 - glycogenin
439	Cluster-6135.5	376	2475853	XP_003243363.1	454	6.2e-43	PREDICTED: structural maintenance of chromosomes protein 4 [Acyrthosiphon pisum]	XM_003243315.3	XM_003243315	313	2.08e-161	PREDICTED: Acyrthosiphon pisum structural maintenance of chromosomes protein 4 (LOC100167401), mRNA	K06675	SMC4	structural maintenance of chromosome 4	http://www.genome.jp/dbget-bin/www_bget?ko:K06675	Q9NTJ3	151	3.2e-09	Structural maintenance of chromosomes protein 4 OS=Homo sapiens OX=9606 GN=SMC4 PE=1 SV=2	PF04977	Septum formation initiator	GO:0007049	cell cycle	--	--	--	--	KOG0996	Structural maintenance of chromosome protein 4 (chromosome condensation complex Condensin, subunit C)
440	Cluster-6135.6	3201	2475853	XP_003243363.1	4125	0	PREDICTED: structural maintenance of chromosomes protein 4 [Acyrthosiphon pisum]	XM_003243315.3	XM_003243315	2715	0	PREDICTED: Acyrthosiphon pisum structural maintenance of chromosomes protein 4 (LOC100167401), mRNA	K06675	SMC4	structural maintenance of chromosome 4	http://www.genome.jp/dbget-bin/www_bget?ko:K06675	Q12267	963	1.9e-102	Structural maintenance of chromosomes protein 4 OS=Saccharomyces cerevisiae (strain ATCC 204508 / S288c) OX=559292 GN=SMC4 PE=1 SV=1	PF06470//PF02050	SMC proteins Flexible Hinge Domain//Flagellar FliJ protein	GO:0071973//GO:0051276//GO:0006935	bacterial-type flagellum-dependent cell motility//chromosome organization//chemotaxis	GO:0005524//GO:0005515//GO:0003774	ATP binding//protein binding//motor activity	GO:0016020//GO:0005694//GO:0009288	membrane//chromosome//bacterial-type flagellum	KOG0996	Structural maintenance of chromosome protein 4 (chromosome condensation complex Condensin, subunit C)
441	Cluster-5107.2	1042	2476316	XP_001947938.2	1715	1e-188	PREDICTED: telomere length regulation protein TEL2 homolog [Acyrthosiphon pisum]	XM_001947903.4	XM_001947903	954	0	PREDICTED: Acyrthosiphon pisum telomere length regulation protein TEL2 homolog (LOC100163744), mRNA	--	--	--	--	--	--	--	--	--	--	--	--	--	--	--	--	--	--
442	Cluster-3164.0	2668	11753886	PNF31490.1	2474	2.6e-276	hypothetical protein B7P43_G00751 [Cryptotermes secundus]	XM_001947275.4	XM_001947275	2302	0	PREDICTED: Acyrthosiphon pisum uncharacterized LOC100159344 (LOC100159344), mRNA	--	--	--	--	--	--	--	--	--	--	--	--	--	--	--	--	--	--
443	Cluster-5107.0	369	10800920	XP_022165382.1	502	1.6e-48	telomere length regulation protein TEL2 homolog [Myzus persicae]	XM_001947903.4	XM_001947903	318	3.39e-164	PREDICTED: Acyrthosiphon pisum telomere length regulation protein TEL2 homolog (LOC100163744), mRNA	--	--	--	--	--	--	--	--	--	--	--	--	--	--	--	--	--	--
444	Cluster-5107.1	3053	2476316	XP_001947938.2	1697	3.7e-186	PREDICTED: telomere length regulation protein TEL2 homolog [Acyrthosiphon pisum]	XM_001947903.4	XM_001947903	1588	0	PREDICTED: Acyrthosiphon pisum telomere length regulation protein TEL2 homolog (LOC100163744), mRNA	--	--	--	--	Q14677	699	7.4e-72	Clathrin interactor 1 OS=Homo sapiens OX=9606 GN=CLINT1 PE=1 SV=1	PF07651	ANTH domain	--	--	GO:0005543	phospholipid binding	--	--	KOG2056	Equilibrative nucleoside transporter protein
445	Cluster-4816.0	414	--	--	--	--	--	--	--	--	--	--	--	--	--	--	--	--	--	--	--	--	--	--	--	--	--	--	--	--
446	Cluster-1977.0	1279	1166830	XP_001944716.1	490	1.4e-46	PREDICTED: glyoxal reductase [Acyrthosiphon pisum]	XM_008185506.2	XM_008185506	404	0	PREDICTED: Acyrthosiphon pisum transcription factor Adf-1 (LOC100161781), transcript variant X1, mRNA	--	--	--	--	Q9C1X5	143	9.1e-08	Uncharacterized oxidoreductase P32A8.02 OS=Schizosaccharomyces pombe (strain 972 / ATCC 24843) OX=284812 GN=SPAP32A8.02 PE=3 SV=1	--	--	--	--	--	--	--	--	--	--
447	Cluster-11682.0	925	8343496	XP_016659052.1	1481	1.2e-161	PREDICTED: probable ATP-dependent RNA helicase spindle-E [Acyrthosiphon pisum]	XM_016803563.1	XM_016803563	799	0	PREDICTED: Acyrthosiphon pisum probable ATP-dependent RNA helicase spindle-E (LOC100166308), mRNA	K18408	TDRD9	ATP-dependent RNA helicase TDRD9	http://www.genome.jp/dbget-bin/www_bget?ko:K18408	B0XDC4	606	1.4e-61	Probable ATP-dependent RNA helicase spindle-E OS=Culex quinquefasciatus OX=7176 GN=spn-E PE=3 SV=1	PF00158//PF00006//PF01443//PF00005//PF00270//PF00437	Sigma-54 interaction domain//ATP synthase alpha/beta family, nucleotide-binding domain//Viral (Superfamily 1) RNA helicase//ABC transporter//DEAD/DEAH box helicase//Type II/IV secretion system protein	GO:0006810//GO:0006355	transport//regulation of transcription, DNA-templated	GO:0016887//GO:0003676//GO:0005524//GO:0008134	ATPase activity//nucleic acid binding//ATP binding//transcription factor binding	GO:0005667	transcription factor complex	KOG0920	ATP-dependent RNA helicase A
448	Cluster-5016.0	393	--	--	--	--	--	XM_001950072.4	XM_001950072	264	3.79e-134	PREDICTED: Acyrthosiphon pisum uncharacterized protein C45G9.7 (LOC100161318), mRNA	--	--	--	--	--	--	--	--	--	--	--	--	--	--	--	--	--	--
449	Cluster-1560.0	640	8334164	XP_016656337.1	1097	2.9e-117	PREDICTED: kinesin-like protein KIF21A isoform X1 [Acyrthosiphon pisum]	XM_008180344.2	XM_008180344	607	0	PREDICTED: Acyrthosiphon pisum kinesin-like protein KIF21A (LOC100165731), transcript variant X3, mRNA	K10395	KIF4_21_27	kinesin family member 4/21/27	http://www.genome.jp/dbget-bin/www_bget?ko:K10395	F1M5N7	560	2e-56	Kinesin-like protein KIF21B OS=Rattus norvegicus OX=10116 GN=Kif21b PE=1 SV=2	PF00225	Kinesin motor domain	GO:0007018//GO:0007017	microtubule-based movement//microtubule-based process	GO:0008017//GO:0003777//GO:0005524	microtubule binding//microtubule motor activity//ATP binding	GO:0045298//GO:0005874	tubulin complex//microtubule	KOG0244	Kinesin-like protein
450	Cluster-8159.0	337	--	--	--	--	--	--	--	--	--	--	--	--	--	--	--	--	--	--	--	--	--	--	--	--	--	--	--	--
451	Cluster-7797.0	386	--	--	--	--	--	--	--	--	--	--	--	--	--	--	--	--	--	--	--	--	--	--	--	--	--	--	--	--
452	Cluster-750.0	1862	8350320	XP_016662573.1	1771	5.9e-195	PREDICTED: probable vesicular glutamate transporter eat-4 [Acyrthosiphon pisum]	XM_016807084.1	XM_016807084	1068	0	PREDICTED: Acyrthosiphon pisum probable vesicular glutamate transporter eat-4 (LOC100570632), transcript variant X6, mRNA	--	--	--	--	P34644	202	1.9e-14	Probable vesicular glutamate transporter eat-4 OS=Caenorhabditis elegans OX=6239 GN=eat-4 PE=2 SV=2	--	--	--	--	--	--	--	--	KOG2532	Permease of the major facilitator superfamily
453	Cluster-11229.0	442	8348385	XP_016660623.1	542	4.5e-53	PREDICTED: runt-related transcription factor 1-like isoform X3 [Acyrthosiphon pisum]	XM_016805134.1	XM_016805134	394	0	PREDICTED: Acyrthosiphon pisum runt-related transcription factor 1-like (LOC100160117), transcript variant X3, mRNA	K08367	RUNX1, AML1	runt-related transcription factor 1	http://www.genome.jp/dbget-bin/www_bget?ko:K08367	Q01196	322	5.5e-29	Runt-related transcription factor 1 OS=Homo sapiens OX=9606 GN=RUNX1 PE=1 SV=3	PF00853	Runt domain	GO:0006355	regulation of transcription, DNA-templated	GO:0003700//GO:0003677	transcription factor activity, sequence-specific DNA binding//DNA binding	GO:0005667	transcription factor complex	KOG3982	Runt and related transcription factors
454	Cluster-9571.0	655	--	--	--	--	--	--	--	--	--	--	--	--	--	--	--	--	--	--	--	--	--	--	--	--	--	--	--	--
455	Cluster-1031.0	4752	1586108	NP_001153823.1	3568	0	acetyl coenzyme A synthase [Acyrthosiphon pisum]	NM_001160351.1	NM_001160351	2799	0	Acyrthosiphon pisum acetyl coenzyme A synthase (Accoas), mRNA	K01895	ACSS, acs	acetyl-CoA synthetase	http://www.genome.jp/dbget-bin/www_bget?ko:K01895	Q9VP61	2790	0	Acetyl-coenzyme A synthetase OS=Drosophila melanogaster OX=7227 GN=AcCoAS PE=2 SV=1	PF03602//PF01596//PF09445//PF02005//PF00501//PF05958//PF16668//PF05175//PF02086//PF08241	Conserved hypothetical protein 95//O-methyltransferase//RNA cap guanine-N2 methyltransferase//N2,N2-dimethylguanosine tRNA methyltransferase//AMP-binding enzyme//tRNA (Uracil-5-)-methyltransferase//Adhesin from Campylobacter//Methyltransferase small domain//D12 class N6 adenine-specific DNA methyltransferase//Methyltransferase domain	GO:0001510//GO:0006306//GO:0032775//GO:0008033//GO:0009452//GO:0009451//GO:0007155//GO:0008152//GO:0031167//GO:0006396	RNA methylation//DNA methylation//DNA methylation on adenine//tRNA processing//7-methylguanosine RNA capping//RNA modification//cell adhesion//metabolic process//rRNA methylation//RNA processing	GO:0009007//GO:0004809//GO:0008171//GO:0008168//GO:0003723//GO:0003824//GO:0008173	site-specific DNA-methyltransferase (adenine-specific) activity//tRNA (guanine-N2-)-methyltransferase activity//O-methyltransferase activity//methyltransferase activity//RNA binding//catalytic activity//RNA methyltransferase activity	--	--	KOG1175	Acyl-CoA synthetase
456	Cluster-1031.1	391	--	--	--	--	--	--	--	--	--	--	--	--	--	--	--	--	--	--	--	--	--	--	--	--	--	--	--	--
457	Cluster-12643.0	1742	4411794	XP_008189929.1	2195	3.8e-244	PREDICTED: JNK-interacting protein 1 isoform X2 [Acyrthosiphon pisum]	XM_008191707.2	XM_008191707	1547	0	PREDICTED: Acyrthosiphon pisum JNK-interacting protein 1 (LOC100165593), transcript variant X2, mRNA	K04434	MAPK8IP1, JIP1	mitogen-activated protein kinase 8 interacting protein 1	http://www.genome.jp/dbget-bin/www_bget?ko:K04434	Q9W0K0	969	2.1e-103	JNK-interacting protein 1 OS=Drosophila melanogaster OX=7227 GN=Aplip1 PE=1 SV=2	PF00018//PF14604//PF00640//PF14719//PF08416	SH3 domain//Variant SH3 domain//Phosphotyrosine interaction domain (PTB/PID)//Phosphotyrosine interaction domain (PTB/PID)//Phosphotyrosine-binding domain	--	--	GO:0005515	protein binding	--	--	KOG3775	Mitogen-activated protein kinase scaffold protein JIP
458	Cluster-3959.1021	3317	7693466	XP_015365490.1	2638	3.1e-295	PREDICTED: vesicular acetylcholine transporter [Diuraphis noxia]	XM_015510004.1	XM_015510004	1914	0	PREDICTED: Diuraphis noxia vesicular acetylcholine transporter (LOC107162879), mRNA	K14636	SLC18A3, VACHT	MFS transporter, DHA1 family, solute carrier family 18 (vesicular acetylcholine transporter), member 3	http://www.genome.jp/dbget-bin/www_bget?ko:K14636	O17444	1828	9.7e-203	Vesicular acetylcholine transporter OS=Drosophila melanogaster OX=7227 GN=VAChT PE=2 SV=2	PF07690	Major Facilitator Superfamily	GO:0055085	transmembrane transport	--	--	GO:0016021	integral component of membrane	KOG3764	Vesicular amine transporter
459	Cluster-3959.1020	3304	10803123	XP_022167819.1	4329	0	tyrosine-protein kinase transmembrane receptor Ror-like isoform X2 [Myzus persicae]	XM_001948569.4	XM_001948569	2689	0	PREDICTED: Acyrthosiphon pisum tyrosine-protein kinase transmembrane receptor Ror (LOC100163146), mRNA	K05122	ROR1, NTRKR1	receptor tyrosine kinase-like orphan receptor 1	http://www.genome.jp/dbget-bin/www_bget?ko:K05122	Q01973	1337	8.3e-146	Inactive tyrosine-protein kinase transmembrane receptor ROR1 OS=Homo sapiens OX=9606 GN=ROR1 PE=1 SV=2	PF00069//PF07714//PF01392//PF03846//PF13895	Protein kinase domain//Protein tyrosine kinase//Fz domain//Cell division inhibitor SulA//Immunoglobulin domain	GO:0009432//GO:0051782//GO:0006468	SOS response//negative regulation of cell division//protein phosphorylation	GO:0004672//GO:0005524//GO:0005515	protein kinase activity//ATP binding//protein binding	GO:0009276	Gram-negative-bacterium-type cell wall	KOG1026	Nerve growth factor receptor TRKA and related tyrosine kinases
460	Cluster-3959.1023	2901	9766481	XP_018912089.1	2925	0	PREDICTED: carnitine O-palmitoyltransferase 1, liver isoform isoform X1 [Bemisia tabaci]	XM_016808687.1	XM_016808687	2443	0	PREDICTED: Acyrthosiphon pisum carnitine O-palmitoyltransferase 1, liver isoform (LOC100164300), transcript variant X1, mRNA	K08765	CPT1A	carnitine O-palmitoyltransferase 1, liver isoform	http://www.genome.jp/dbget-bin/www_bget?ko:K08765	P97742	1975	7.7e-220	Carnitine O-palmitoyltransferase 1, liver isoform OS=Mus musculus OX=10090 GN=Cpt1a PE=1 SV=4	PF00755	Choline/Carnitine o-acyltransferase	--	--	GO:0016746	transferase activity, transferring acyl groups	--	--	KOG3716	Carnitine O-acyltransferase CPTI
461	Cluster-830.0	1574	1167159	XP_001946480.1	1403	2.3e-152	PREDICTED: seipin [Acyrthosiphon pisum]	XM_001946445.4	XM_001946445	1237	0	PREDICTED: Acyrthosiphon pisum seipin (LOC100169035), mRNA	K19365	BSCL2	seipin	http://www.genome.jp/dbget-bin/www_bget?ko:K19365	Q9V3X4	548	1.2e-54	Seipin OS=Drosophila melanogaster OX=7227 GN=Seipin PE=2 SV=1	--	--	--	--	--	--	--	--	--	--
462	Cluster-3959.1025	5243	2478548	XP_003247443.1	7418	0	PREDICTED: protein dopey-1 homolog isoform X5 [Acyrthosiphon pisum]	XM_003247395.3	XM_003247395	4976	0	PREDICTED: Acyrthosiphon pisum protein dopey-1 homolog (LOC100166394), transcript variant X6, mRNA	--	--	--	--	Q292H2	2066	3.9e-230	Protein dopey-1 homolog OS=Drosophila pseudoobscura pseudoobscura OX=46245 GN=GA13490 PE=3 SV=1	--	--	--	--	--	--	--	--	KOG3613	Dopey and related predicted leucine zipper transcription factors
463	Cluster-3959.1024	3597	2475517	XP_003242779.1	2651	1e-296	PREDICTED: septin-7 isoform X1 [Acyrthosiphon pisum]	XM_003242731.3	XM_003242731	3121	0	PREDICTED: Acyrthosiphon pisum septin-7 (LOC100159522), transcript variant X1, mRNA	K16944	SEPT7, CDC3	septin 7	http://www.genome.jp/dbget-bin/www_bget?ko:K16944	Q5R1W1	1238	2.7e-134	Septin-7 (Fragment) OS=Pan troglodytes OX=9598 GN=SEPT7 PE=2 SV=2	PF00005//PF03193//PF01926//PF04548//PF00735//PF03938//PF01580//PF04670	ABC transporter//Protein of unknown function, DUF258//50S ribosome-binding GTPase//AIG1 family//Septin//Outer membrane protein (OmpH-like)//FtsK/SpoIIIE family//Gtr1/RagA G protein conserved region	--	--	GO:0003924//GO:0051082//GO:0005524//GO:0016887//GO:0005525//GO:0000166//GO:0003677	GTPase activity//unfolded protein binding//ATP binding//ATPase activity//GTP binding//nucleotide binding//DNA binding	--	--	KOG2655	Septin family protein (P-loop GTPase)
464	Cluster-3959.1027	5084	2476125	XP_001944548.2	5562	0	PREDICTED: uncharacterized protein LOC100163301 [Acyrthosiphon pisum]	XM_001944513.4	XM_001944513	3964	0	PREDICTED: Acyrthosiphon pisum uncharacterized LOC100163301 (LOC100163301), mRNA	--	--	--	--	Q5BJU7	163	1.7e-09	Wiskott-Aldrich syndrome protein family member 1 OS=Rattus norvegicus OX=10116 GN=Wasf1 PE=1 SV=1	PF03721	UDP-glucose/GDP-mannose dehydrogenase family, NAD binding domain	GO:0055114	oxidation-reduction process	GO:0051287//GO:0016616	NAD binding//oxidoreductase activity, acting on the CH-OH group of donors, NAD or NADP as acceptor	--	--	KOG1830	Wiskott Aldrich syndrome proteins
465	Cluster-3959.1026	1547	8349222	XP_016661475.1	656	9.6e-66	PREDICTED: cuticular protein CPG12-like isoform X1 [Acyrthosiphon pisum]	XM_016805986.1	XM_016805986	1119	0	PREDICTED: Acyrthosiphon pisum cuticular protein CPG12-like (LOC100161081), transcript variant X1, mRNA	--	--	--	--	--	--	--	--	--	--	--	--	--	--	--	--	--	--
466	Cluster-3959.649	350	8338876	XP_016657725.1	635	5.9e-64	PREDICTED: lipase member H isoform X1 [Acyrthosiphon pisum]	XM_016802239.1	XM_016802239	341	5.24e-177	PREDICTED: Acyrthosiphon pisum lipase member H (LOC100575760), transcript variant X4, mRNA	K19404	LIPH_I	phosphatidic acid-selective&#160;phospholipase A1	http://www.genome.jp/dbget-bin/www_bget?ko:K19404	Q5XGE9	182	7.5e-13	Lipase member H OS=Xenopus tropicalis OX=8364 GN=liph PE=2 SV=1	--	--	--	--	--	--	--	--	--	--
467	Cluster-3959.648	3216	2475272	XP_001948094.2	4498	0	PREDICTED: extracellular sulfatase Sulf-1 [Acyrthosiphon pisum]	XM_001948059.4	XM_001948059	2854	0	PREDICTED: Acyrthosiphon pisum extracellular sulfatase Sulf-1 (LOC100162518), mRNA	K14607	SULF	extracellular sulfatase Sulf	http://www.genome.jp/dbget-bin/www_bget?ko:K14607	Q9VEX0	1561	8.6e-172	Extracellular sulfatase SULF-1 homolog OS=Drosophila melanogaster OX=7227 GN=Sulf1 PE=1 SV=1	PF01663//PF00884//PF11705//PF03462//PF00514	Type I phosphodiesterase / nucleotide pyrophosphatase//Sulfatase//DNA-directed RNA polymerase III subunit Rpc31//PCRF domain//Armadillo/beta-catenin-like repeat	GO:0008152//GO:0006359//GO:0006415//GO:0006449	metabolic process//regulation of transcription from RNA polymerase III promoter//translational termination//regulation of translational termination	GO:0005515//GO:0003824//GO:0016149//GO:0008484	protein binding//catalytic activity//translation release factor activity, codon specific//sulfuric ester hydrolase activity	GO:0005840//GO:0005737//GO:0018444	ribosome//cytoplasm//translation release factor complex	KOG3731	Sulfatases
468	Cluster-3959.319	306	--	--	--	--	--	--	--	--	--	--	--	--	--	--	--	--	--	--	--	--	--	--	--	--	--	--	--	--
469	Cluster-3959.318	1550	10808833	XP_022174118.1	1805	5.6e-199	cathepsin B-like [Myzus persicae]	NM_001134928.1	NM_001134928	928	0	Acyrthosiphon pisum cathepsin B-16D2 (Catb-16d2), mRNA	K01363	CTSB	cathepsin B	http://www.genome.jp/dbget-bin/www_bget?ko:K01363	P00787	671	6.6e-69	Cathepsin B OS=Rattus norvegicus OX=10116 GN=Ctsb PE=1 SV=2	PF08127//PF00112	Peptidase family C1 propeptide//Papain family cysteine protease	GO:0050790//GO:0006508	regulation of catalytic activity//proteolysis	GO:0008234//GO:0004197	cysteine-type peptidase activity//cysteine-type endopeptidase activity	--	--	KOG1543	Cysteine proteinase Cathepsin L
470	Cluster-3959.869	1281	4413712	XP_008180969.1	1171	1.5e-125	PREDICTED: protein SMG5 [Acyrthosiphon pisum]	XM_008182747.2	XM_008182747	1069	0	PREDICTED: Acyrthosiphon pisum protein SMG5 (LOC100167840), mRNA	K11125	SMG5, EST1B	protein SMG5	http://www.genome.jp/dbget-bin/www_bget?ko:K11125	Q9UPR3	165	2.6e-10	Protein SMG5 OS=Homo sapiens OX=9606 GN=SMG5 PE=1 SV=3	PF06667	Phage shock protein B	GO:0006355//GO:0009271	regulation of transcription, DNA-templated//phage shock	--	--	--	--	--	--
471	Cluster-3959.868	1186	7687811	XP_015364072.1	928	2.1e-97	PREDICTED: protein takeout-like [Diuraphis noxia]	AK340951.1	AK340951	846	0	Acyrthosiphon pisum mRNA, clone: 50A15, full-insert cDNA sequence based on the ESTs (5'-EST:EX630867, 3'-EST:EX631209)	--	--	--	--	O76879	181	3.3e-12	Circadian clock-controlled protein OS=Drosophila melanogaster OX=7227 GN=anon-3B1.2 PE=2 SV=2	--	--	--	--	--	--	--	--	--	--
472	Cluster-1231.0	3686	10809546	XP_022174903.1	1849	1.1e-203	cAMP-dependent protein kinase type II regulatory subunit [Myzus persicae]	XM_001944838.4	XM_001944838	2445	0	PREDICTED: Acyrthosiphon pisum cAMP-dependent protein kinase type II regulatory subunit (LOC100168644), transcript variant X1, mRNA	K04739	PRKAR	cAMP-dependent protein kinase regulator	http://www.genome.jp/dbget-bin/www_bget?ko:K04739	P81900	1098	4.8e-118	cAMP-dependent protein kinase type II regulatory subunit OS=Drosophila melanogaster OX=7227 GN=Pka-R2 PE=1 SV=2	PF03335	Phage tail fibre repeat	--	--	GO:0005198	structural molecule activity	--	--	KOG1113	cAMP-dependent protein kinase types I and II, regulatory subunit
473	Cluster-11395.0	5248	2476118	XP_003243834.1	5971	0	PREDICTED: uncharacterized protein LOC100571674 isoform X1 [Acyrthosiphon pisum]	XM_008183820.2	XM_008183820	4016	0	PREDICTED: Acyrthosiphon pisum uncharacterized LOC100571674 (LOC100571674), transcript variant X2, mRNA	--	--	--	--	--	--	--	--	PF03609//PF07728	PTS system sorbose-specific iic component//AAA domain (dynein-related subfamily)	GO:0009401	phosphoenolpyruvate-dependent sugar phosphotransferase system	GO:0016887//GO:0005524	ATPase activity//ATP binding	GO:0016021	integral component of membrane	--	--
474	Cluster-3959.313	4224	4415444	XP_008183815.1	1828	3.3e-201	PREDICTED: ATP-binding cassette sub-family G member 4 isoform X2 [Acyrthosiphon pisum]	XM_008185594.2	XM_008185594	1675	0	PREDICTED: Acyrthosiphon pisum ATP-binding cassette sub-family G member 4 (LOC100166685), transcript variant X3, mRNA	K05680	ABCG4	ATP-binding cassette, subfamily G (WHITE), member 4	http://www.genome.jp/dbget-bin/www_bget?ko:K05680	Q9H172	524	2e-51	ATP-binding cassette sub-family G member 4 OS=Homo sapiens OX=9606 GN=ABCG4 PE=1 SV=2	PF07690//PF01061	Major Facilitator Superfamily//ABC-2 type transporter	GO:0055085	transmembrane transport	--	--	GO:0016021//GO:0016020	integral component of membrane//membrane	--	--
475	Cluster-3959.312	1846	1595332	BAH71893.1	998	2.5e-105	ACYPI000393 [Acyrthosiphon pisum]	NM_001161909.2	NM_001161909	913	0	Acyrthosiphon pisum THO complex 7-like (LOC100158978), mRNA	K13176	THOC7	THO complex subunit 7	http://www.genome.jp/dbget-bin/www_bget?ko:K13176	Q6DGZ3	322	2.3e-28	THO complex subunit 7 homolog OS=Danio rerio OX=7955 GN=thoc7 PE=2 SV=1	PF02601//PF05615//PF02050//PF05531//PF05739//PF03836//PF03938	Exonuclease VII, large subunit//Tho complex subunit 7//Flagellar FliJ protein//Nucleopolyhedrovirus P10 protein//SNARE domain//RasGAP C-terminus//Outer membrane protein (OmpH-like)	GO:0006308//GO:0071973//GO:0006397//GO:0007264//GO:0006935	DNA catabolic process//bacterial-type flagellum-dependent cell motility//mRNA processing//small GTPase mediated signal transduction//chemotaxis	GO:0008855//GO:0051082//GO:0005515//GO:0003774//GO:0005096	exodeoxyribonuclease VII activity//unfolded protein binding//protein binding//motor activity//GTPase activator activity	GO:0019028//GO:0009318//GO:0016020//GO:0009288//GO:0000445	viral capsid//exodeoxyribonuclease VII complex//membrane//bacterial-type flagellum//THO complex part of transcription export complex	KOG3215	Uncharacterized conserved protein
476	Cluster-3959.311	500	--	--	--	--	--	--	--	--	--	--	--	--	--	--	--	--	--	--	--	--	--	--	--	--	--	--	--	--
477	Cluster-3959.310	2693	4415045	XP_008183161.1	1541	4e-168	PREDICTED: uncharacterized protein LOC100167481 [Acyrthosiphon pisum]	XM_008184939.2	XM_008184939	2248	0	PREDICTED: Acyrthosiphon pisum uncharacterized LOC100167481 (LOC100167481), mRNA	--	--	--	--	--	--	--	--	PF03285	Paralemmin	GO:0008360	regulation of cell shape	--	--	GO:0016020	membrane	--	--
478	Cluster-3959.317	2463	1168928	XP_001946926.1	3265	0	PREDICTED: uncharacterized protein LOC100166175 isoform X1 [Acyrthosiphon pisum]	XM_001946891.4	XM_001946891	2178	0	PREDICTED: Acyrthosiphon pisum sperm-associated antigen 1-like (LOC100166175), transcript variant X1, mRNA	--	--	--	--	Q5U2X2	341	1.9e-30	Sperm-associated antigen 1 OS=Rattus norvegicus OX=10116 GN=Spag1 PE=1 SV=1	PF13181//PF13371//PF00515//PF13414	Tetratricopeptide repeat//Tetratricopeptide repeat//Tetratricopeptide repeat//TPR repeat	--	--	GO:0005515	protein binding	--	--	KOG0376	Serine-threonine phosphatase 2A, catalytic subunit
479	Cluster-3959.316	1208	1657302	NP_001156283.1	947	1.4e-99	augmenter of liver regeneration-like [Acyrthosiphon pisum]	NM_001162811.1	AK342131	918	0	Acyrthosiphon pisum augmenter of liver regeneration-like (LOC100168181), mRNA >dbj|AK342131.1| Acyrthosiphon pisum ACYPI008907 mRNA, clone: 261G19, complete cds, full-insert cDNA sequence based on the ESTs (5'-EST:EX649004, 3'-EST:EX649409)	K17783	ERV1, GFER, ALR	mitochondrial FAD-linked sulfhydryl oxidase	http://www.genome.jp/dbget-bin/www_bget?ko:K17783	P56213	394	6.8e-37	FAD-linked sulfhydryl oxidase ALR OS=Mus musculus OX=10090 GN=Gfer PE=1 SV=2	PF04777	Erv1 / Alr family	GO:0055114	oxidation-reduction process	GO:0016972	thiol oxidase activity	--	--	KOG3355	Mitochondrial sulfhydryl oxidase involved in the biogenesis of cytosolic Fe/S proteins
480	Cluster-3959.315	2003	4418716	XP_008189347.1	1144	3.2e-122	PREDICTED: Na..+....H..+.. exchange regulatory cofactor NHE-RF1 [Acyrthosiphon pisum]	XM_008191125.2	XM_008191125	1562	0	PREDICTED: Acyrthosiphon pisum Na(+)/H(+) exchange regulatory cofactor NHE-RF1 (LOC103311490), mRNA	K13358	SLC9A3R2, NHERF2	Na(+)/H(+) exchange regulatory cofactor NHE-RF2	http://www.genome.jp/dbget-bin/www_bget?ko:K13358	Q3SZK8	240	8.1e-19	Na(+)/H(+) exchange regulatory cofactor NHE-RF1 OS=Bos taurus OX=9913 GN=SLC9A3R1 PE=2 SV=1	PF13180//PF00595	PDZ domain//PDZ domain (Also known as DHR or GLGF)	--	--	GO:0005515	protein binding	--	--	KOG3528	FOG: PDZ domain
481	Cluster-3959.314	3216	2477558	XP_001947691.2	1206	3.3e-129	PREDICTED: protein PF14_0175-like [Acyrthosiphon pisum]	XM_001947656.4	XM_001947656	945	0	PREDICTED: Acyrthosiphon pisum protein PF14_0175-like (LOC100165355), mRNA	--	--	--	--	Q54K19	144	1.8e-07	Myb-like protein D OS=Dictyostelium discoideum OX=44689 GN=mybD PE=3 SV=1	PF01361//PF00050//PF07966	Tautomerase enzyme//Kazal-type serine protease inhibitor domain//A1 Propeptide	GO:0006725//GO:0006508	cellular aromatic compound metabolic process//proteolysis	GO:0016853//GO:0005515//GO:0004190	isomerase activity//protein binding//aspartic-type endopeptidase activity	--	--	--	--
482	Cluster-6109.0	342	4579213	CDW60423.1	383	9.5e-35	KicB and MukE and Methyltransf 31 domain containi ng protein [Trichuris trichiura]	CP017979.1	CP017979	342	1.42e-177	Escherichia coli str. K-12 substr. W3110 substrain ZK126 genome	--	--	--	--	Q8XDG3	383	3.6e-36	tRNA 5-carboxymethoxyuridine methyltransferase OS=Escherichia coli O157:H7 OX=83334 GN=cmoM PE=1 SV=1	PF00728	Glycosyl hydrolase family 20, catalytic domain	GO:0005975	carbohydrate metabolic process	GO:0004553	hydrolase activity, hydrolyzing O-glycosyl compounds	--	--	--	--
483	Cluster-8867.0	411	2475709	XP_003243107.1	668	1e-67	PREDICTED: cuticle protein 19-like [Acyrthosiphon pisum]	XM_003243059.3	XM_003243059	369	0	PREDICTED: Acyrthosiphon pisum cuticle protein 19-like (LOC100571545), mRNA	--	--	--	--	P45583	282	2.2e-24	Cuticle protein 19 OS=Locusta migratoria OX=7004 PE=1 SV=1	PF00379//PF00944	Insect cuticle protein//Alphavirus core protein	GO:0006508	proteolysis	GO:0042302//GO:0004252	structural constituent of cuticle//serine-type endopeptidase activity	GO:0016020	membrane	--	--
484	Cluster-5517.0	546	10810345	XP_022175785.1	854	3.7e-89	GDP-fucose protein O-fucosyltransferase 1 [Myzus persicae]	XM_008186751.2	XM_008186751	439	0	PREDICTED: Acyrthosiphon pisum GDP-fucose protein O-fucosyltransferase 1 (LOC100169478), mRNA	K03691	POFUT	peptide-O-fucosyltransferase	http://www.genome.jp/dbget-bin/www_bget?ko:K03691	Q9V6X7	521	5.8e-52	GDP-fucose protein O-fucosyltransferase 1 OS=Drosophila melanogaster OX=7227 GN=O-fut1 PE=1 SV=1	--	--	--	--	--	--	--	--	KOG3849	GDP-fucose protein O-fucosyltransferase
485	Cluster-10422.0	398	7698139	XP_015370667.1	246	8.6e-19	PREDICTED: iroquois-class homeodomain protein irx-1-A-like [Diuraphis noxia]	XM_001948358.4	XM_001948358	354	0	PREDICTED: Acyrthosiphon pisum orthodenticle (LOC100169486), transcript variant X2, mRNA	--	--	--	--	--	--	--	--	PF00906	Hepatitis core antigen	GO:0009405	pathogenesis	GO:0005198	structural molecule activity	--	--	--	--
486	Cluster-7311.0	529	3297155	ELT92094.1	451	1.9e-42	hypothetical protein CAPTEDRAFT_185071 [Capitella teleta]	CP016404.1	CP016404	529	0	Escherichia coli strain 210221272, complete genome	--	--	--	--	P0ACJ8	743	1e-77	cAMP-activated global transcriptional regulator CRP OS=Escherichia coli (strain K12) OX=83333 GN=crp PE=1 SV=1	--	--	--	--	--	--	--	--	KOG0498	K+-channel ERG and related proteins, contain PAS/PAC sensor domain
487	Cluster-1211.0	1252	--	--	--	--	--	--	--	--	--	--	--	--	--	--	--	--	--	--	PF08498	Sterol methyltransferase C-terminal	GO:0006694	steroid biosynthetic process	GO:0008168	methyltransferase activity	--	--	--	--
488	Cluster-12311.0	579	--	--	--	--	--	XM_008180634.2	XM_008180634	81	3.07e-32	PREDICTED: Acyrthosiphon pisum protein vav (LOC100163912), transcript variant X2, mRNA	--	--	--	--	--	--	--	--	--	--	--	--	--	--	--	--	--	--
489	Cluster-5500.0	740	2477215	XP_001948510.2	426	2.1e-39	PREDICTED: uncharacterized protein LOC100169619 [Acyrthosiphon pisum]	XM_001948475.4	XM_001948475	386	0	PREDICTED: Acyrthosiphon pisum uncharacterized LOC100169619 (LOC100169619), mRNA	--	--	--	--	--	--	--	--	PF04277	Oxaloacetate decarboxylase, gamma chain	GO:0006090//GO:0006560//GO:0006814//GO:0071436//GO:0006525	pyruvate metabolic process//proline metabolic process//sodium ion transport//sodium ion export//arginine metabolic process	GO:0008948//GO:0015081	oxaloacetate decarboxylase activity//sodium ion transmembrane transporter activity	GO:0016020	membrane	--	--
490	Cluster-9104.0	340	--	--	--	--	--	--	--	--	--	--	--	--	--	--	--	--	--	--	--	--	--	--	--	--	--	--	--	--
491	Cluster-11389.0	307	--	--	--	--	--	XM_001945215.3	XM_001945215	267	6.2e-136	PREDICTED: Acyrthosiphon pisum ubiquitin domain-containing protein 1 (LOC100161292), mRNA	--	--	--	--	--	--	--	--	--	--	--	--	--	--	--	--	--	--
492	Cluster-10797.0	382	10796625	XP_022160609.1	374	1.2e-33	neurexin-1-like [Myzus persicae]	XM_016808102.1	XM_016808102	197	6.46e-97	PREDICTED: Acyrthosiphon pisum neurexin-1 (LOC100169186), mRNA	K07377	NRXN	neurexin	http://www.genome.jp/dbget-bin/www_bget?ko:K07377	A1XQX0	190	9.7e-14	Neurexin-1a OS=Danio rerio OX=7955 GN=nrxn1a PE=2 SV=1	PF00008	EGF-like domain	--	--	GO:0005515	protein binding	--	--	--	--
493	Cluster-6129.0	2656	4412811	XP_008179479.1	363	1.6e-31	PREDICTED: serine..threonine-protein phosphatase 2A 65 kDa regulatory subunit A beta isoform-like [Acyrthosiphon pisum]	XM_008181257.2	XM_008181257	702	0	PREDICTED: Acyrthosiphon pisum serine/threonine-protein phosphatase 2A 65 kDa regulatory subunit A beta isoform-like (LOC103308215), mRNA	--	--	--	--	--	--	--	--	--	--	--	--	--	--	--	--	--	--
494	Cluster-5163.0	776	--	--	--	--	--	--	--	--	--	--	--	--	--	--	--	--	--	--	PF00159	Pancreatic hormone peptide	GO:0007165	signal transduction	GO:0005179	hormone activity	GO:0005576	extracellular region	--	--
495	Cluster-4818.0	1254	4416959	XP_008186521.1	762	4e-78	PREDICTED: protein Dr1 isoform X1 [Acyrthosiphon pisum]	AK342215.1	AK342215	977	0	Acyrthosiphon pisum ACYPI002304 mRNA, clone: 315G17, complete cds, full-insert cDNA sequence based on the ESTs (5'-EST:FF304299, 3'-EST:FF305556)	--	--	--	--	Q9VJQ5	391	1.6e-36	Protein Dr1 OS=Drosophila melanogaster OX=7227 GN=NC2beta PE=1 SV=1	PF04632//PF15510	Fusaric acid resistance protein family//Centromere kinetochore component W	GO:0006810//GO:0051382//GO:0007067	transport//kinetochore assembly//mitotic nuclear division	GO:0003677	DNA binding	GO:0005886	plasma membrane	KOG0871	Class 2 transcription repressor NC2, beta subunit (Dr1)
496	Cluster-1953.0	1497	10813648	XP_022179418.1	1346	9.1e-146	etoposide-induced protein 2.4 homolog [Myzus persicae]	XM_016804497.1	XM_016804497	977	0	PREDICTED: Acyrthosiphon pisum etoposide-induced protein 2.4 homolog (LOC100159951), mRNA	K10134	EI24	etoposide-induced 2.4 mRNA	http://www.genome.jp/dbget-bin/www_bget?ko:K10134	Q61070	573	1.5e-57	Etoposide-induced protein 2.4 OS=Mus musculus OX=10090 GN=Ei24 PE=1 SV=3	--	--	--	--	--	--	--	--	KOG3966	p53-mediated apoptosis protein EI24/PIG8
497	Cluster-6498.0	546	--	--	--	--	--	--	--	--	--	--	--	--	--	--	--	--	--	--	--	--	--	--	--	--	--	--	--	--
498	Cluster-6498.1	308	--	--	--	--	--	--	--	--	--	--	--	--	--	--	--	--	--	--	--	--	--	--	--	--	--	--	--	--
499	Cluster-6258.0	445	8347773	XP_016660094.1	419	8.4e-39	PREDICTED: uncharacterized protein LOC107883821 [Acyrthosiphon pisum]	--	--	--	--	--	--	--	--	--	P23074	131	7.8e-07	Pro-Pol polyprotein OS=Simian foamy virus type 1 OX=338478 GN=pol PE=1 SV=3	--	--	--	--	--	--	--	--	--	--
500	Cluster-11910.1	1075	8351758	XP_001950130.3	1516	1.3e-165	PREDICTED: nuclear pore complex protein Nup155 [Acyrthosiphon pisum]	XM_001950095.3	XM_001950095	928	0	PREDICTED: Acyrthosiphon pisum nuclear pore complex protein Nup155 (LOC100163633), mRNA	K14312	NUP155, NUP170, NUP157	nuclear pore complex protein Nup155	http://www.genome.jp/dbget-bin/www_bget?ko:K14312	O75694	520	1.5e-51	Nuclear pore complex protein Nup155 OS=Homo sapiens OX=9606 GN=NUP155 PE=1 SV=1	--	--	--	--	--	--	--	--	KOG1900	Nuclear pore complex, Nup155 component (D Nup154, sc Nup157/Nup170)
501	Cluster-7092.0	358	--	--	--	--	--	--	--	--	--	--	--	--	--	--	--	--	--	--	--	--	--	--	--	--	--	--	--	--
502	Cluster-7440.0	3378	8349520	XP_016661777.1	3614	0	PREDICTED: uncharacterized protein LOC100160598 isoform X2 [Acyrthosiphon pisum]	XM_001945014.4	XM_001945014	2975	0	PREDICTED: Acyrthosiphon pisum uncharacterized LOC100160598 (LOC100160598), transcript variant X1, mRNA	--	--	--	--	Q2KI24	383	3.6e-35	Methenyltetrahydrofolate synthase domain-containing protein OS=Bos taurus OX=9913 GN=MTHFSD PE=2 SV=1	PF08022//PF00641	FAD-binding domain//Zn-finger in Ran binding protein and others	GO:0055114	oxidation-reduction process	GO:0008270//GO:0016491	zinc ion binding//oxidoreductase activity	--	--	KOG4410	5-formyltetrahydrofolate cyclo-ligase
503	Cluster-3959.2267	732	10794441	XP_022175067.1	159	1.9e-08	uncharacterized protein LOC111037022 isoform X1 [Myzus persicae]	XM_016808751.1	XM_016808751	117	3.83e-52	PREDICTED: Acyrthosiphon pisum INO80 complex subunit C-like (LOC100163771), transcript variant X1, mRNA	--	--	--	--	--	--	--	--	--	--	--	--	--	--	--	--	--	--
504	Cluster-9693.0	4790	10813682	XP_022179455.1	3726	0	centaurin-gamma-1A isoform X1 [Myzus persicae]	XM_015509453.1	XM_015509453	2280	0	PREDICTED: Diuraphis noxia centaurin-gamma-1A (LOC107162508), transcript variant X1, mRNA	K12491	AGAP1_3	Arf-GAP with GTPase, ANK repeat and PH domain-containing protein 1/3	http://www.genome.jp/dbget-bin/www_bget?ko:K12491	Q9NGC3	1297	5.3e-141	Centaurin-gamma-1A OS=Drosophila melanogaster OX=7227 GN=CenG1A PE=2 SV=2	PF00071//PF13606//PF08477//PF00023//PF01412	Ras family//Ankyrin repeat//Ras of Complex, Roc, domain of DAPkinase//Ankyrin repeat//Putative GTPase activating protein for Arf	GO:0007264	small GTPase mediated signal transduction	GO:0005515//GO:0005096//GO:0005525	protein binding//GTPase activator activity//GTP binding	--	--	--	--
505	Cluster-9693.1	485	--	--	--	--	--	--	--	--	--	--	--	--	--	--	--	--	--	--	--	--	--	--	--	--	--	--	--	--
506	Cluster-309.0	1090	1624485	NP_001155434.1	643	2.2e-64	NADH dehydrogenase [ubiquinone] 1 alpha subcomplex subunit 6-like [Acyrthosiphon pisum]	NM_001161962.2	NM_001161962	487	0	Acyrthosiphon pisum NADH dehydrogenase [ubiquinone] 1 alpha subcomplex subunit 6-like (LOC100160353), mRNA	K03950	NDUFA6	NADH dehydrogenase (ubiquinone) 1 alpha subcomplex subunit 6	http://www.genome.jp/dbget-bin/www_bget?ko:K03950	Q0MQA3	277	2.3e-23	NADH dehydrogenase [ubiquinone] 1 alpha subcomplex subunit 6 OS=Pongo pygmaeus OX=9600 GN=NDUFA6 PE=2 SV=3	--	--	--	--	--	--	--	--	KOG3426	NADH:ubiquinone oxidoreductase, NDUFA6/B14 subunit
507	Cluster-11237.0	837	2478472	XP_001950691.2	852	9.7e-89	PREDICTED: transmembrane channel-like protein 2 [Acyrthosiphon pisum]	XM_001950656.4	XM_001950656	610	0	PREDICTED: Acyrthosiphon pisum transmembrane channel-like protein 2 (LOC100165476), mRNA	--	--	--	--	--	--	--	--	PF06355	Aegerolysin	GO:0019836	hemolysis by symbiont of host erythrocytes	--	--	--	--	--	--
508	Cluster-148.0	1790	1167103	XP_001949748.1	2531	4.2e-283	PREDICTED: probable ATP-dependent RNA helicase Dbp73D [Acyrthosiphon pisum]	XM_001949688.4	XM_001949688	1516	0	PREDICTED: Acyrthosiphon pisum probable ATP-dependent RNA helicase Dbp73D (LOC100165898), mRNA	K14807	DDX51, DBP6	ATP-dependent RNA helicase DDX51/DBP6	http://www.genome.jp/dbget-bin/www_bget?ko:K14807	P26802	768	4.3e-80	Probable ATP-dependent RNA helicase Dbp73D OS=Drosophila melanogaster OX=7227 GN=Dbp73D PE=2 SV=3	PF00270//PF04851	DEAD/DEAH box helicase//Type III restriction enzyme, res subunit	--	--	GO:0003676//GO:0005524//GO:0016787//GO:0003677	nucleic acid binding//ATP binding//hydrolase activity//DNA binding	--	--	KOG0350	DEAD-box ATP-dependent RNA helicase
509	Cluster-12667.0	327	--	--	--	--	--	--	--	--	--	--	--	--	--	--	--	--	--	--	--	--	--	--	--	--	--	--	--	--
510	Cluster-4684.0	439	10801110	XP_022165591.1	663	4.2e-67	guanine nucleotide exchange factor subunit Rich [Myzus persicae]	XM_001948350.4	XM_001948350	421	0	PREDICTED: Acyrthosiphon pisum guanine nucleotide exchange factor subunit Rich (LOC100165038), mRNA	--	--	--	--	Q9V3C5	158	5.7e-10	Guanine nucleotide exchange factor subunit Rich OS=Drosophila melanogaster OX=7227 GN=Rich PE=1 SV=1	--	--	--	--	--	--	--	--	--	--
511	Cluster-3959.2964	1961	8348919	XP_016661160.1	660	4.2e-66	PREDICTED: tumor suppressor candidate 2 [Acyrthosiphon pisum]	XM_016805671.1	XM_016805671	1292	0	PREDICTED: Acyrthosiphon pisum tumor suppressor candidate 2 (LOC100165060), transcript variant X2, mRNA	--	--	--	--	Q9WVF8	170	1e-10	Tumor suppressor candidate 2 OS=Mus musculus OX=10090 GN=Tusc2 PE=1 SV=3	PF04083	Partial alpha/beta-hydrolase lipase region	GO:0006629	lipid metabolic process	--	--	--	--	--	--
512	Cluster-5928.0	481	2479008	XP_003248215.1	482	4.4e-46	PREDICTED: uncharacterized protein LOC100164466 [Acyrthosiphon pisum]	XM_003248167.3	XM_003248167	308	1.63e-158	PREDICTED: Acyrthosiphon pisum uncharacterized LOC100164466 (LOC100164466), mRNA	--	--	--	--	--	--	--	--	--	--	--	--	--	--	--	--	--	--
513	Cluster-6517.0	391	7703076	XP_015376188.1	327	3.4e-28	PREDICTED: uncharacterized protein LOC107170552 [Diuraphis noxia]	--	--	--	--	--	--	--	--	--	--	--	--	--	PF14833	NAD-binding of NADP-dependent 3-hydroxyisobutyrate dehydrogenase	--	--	GO:0051287	NAD binding	--	--	--	--
514	Cluster-8955.0	2641	8352383	XP_016664429.1	2023	5e-224	PREDICTED: uncharacterized protein LOC100159413 isoform X2 [Acyrthosiphon pisum]	XM_016808940.1	XM_016808940	651	0	PREDICTED: Acyrthosiphon pisum uncharacterized LOC100159413 (LOC100159413), transcript variant X2, mRNA	--	--	--	--	--	--	--	--	PF10589	NADH-ubiquinone oxidoreductase-F iron-sulfur binding region	--	--	GO:0051539	4 iron, 4 sulfur cluster binding	--	--	--	--
515	Cluster-9559.0	3008	2477609	XP_003246092.1	3451	0	PREDICTED: CAS1 domain-containing protein 1 [Acyrthosiphon pisum]	XM_003246044.3	XM_003246044	2067	0	PREDICTED: Acyrthosiphon pisum CAS1 domain-containing protein 1 (LOC100160184), mRNA	--	--	--	--	Q7TN73	1203	2.6e-130	N-acetylneuraminate 9-O-acetyltransferase OS=Mus musculus OX=10090 GN=Casd1 PE=2 SV=1	PF02883	Adaptin C-terminal domain	GO:0016192//GO:0006886	vesicle-mediated transport//intracellular protein transport	--	--	GO:0030131	clathrin adaptor complex	KOG1699	O-acetyltransferase
516	Cluster-1025.0	4391	2475432	XP_001947889.2	6148	0	PREDICTED: voltage-dependent calcium channel subunit alpha-2..delta-3 isoform X2 [Acyrthosiphon pisum]	XM_001947854.4	XM_001947854	3941	0	PREDICTED: Acyrthosiphon pisum voltage-dependent calcium channel subunit alpha-2/delta-3 (LOC100166860), transcript variant X2, mRNA	K05316	CACNA2DN	voltage-dependent calcium channel alpha-2/delta, invertebrate	http://www.genome.jp/dbget-bin/www_bget?ko:K05316	Q5RJF7	1228	4.8e-133	Voltage-dependent calcium channel subunit alpha-2/delta-4 OS=Mus musculus OX=10090 GN=Cacna2d4 PE=2 SV=1	--	--	--	--	--	--	--	--	KOG2353	L-type voltage-dependent Ca2+ channel, alpha2/delta subunit
517	Cluster-7434.0	502	8014442	KYM99630.1	244	1.8e-18	hypothetical protein ALC62_09632, partial [Cyphomyrmex costatus]	--	--	--	--	--	--	--	--	--	--	--	--	--	--	--	--	--	--	--	--	--	--	--
518	Cluster-10683.0	1712	10794927	XP_022181159.1	2171	2.2e-241	dynein assembly factor 3, axonemal homolog [Myzus persicae]	XM_015519802.1	XM_015519802	944	0	PREDICTED: Diuraphis noxia dynein assembly factor 3, axonemal homolog (LOC107169865), mRNA	--	--	--	--	A1ZB91	616	1.7e-62	Dynein assembly factor 3, axonemal homolog OS=Drosophila melanogaster OX=7227 GN=CG17669 PE=2 SV=1	--	--	--	--	--	--	--	--	--	--
519	Cluster-7448.0	641	--	--	--	--	--	--	--	--	--	--	--	--	--	--	--	--	--	--	--	--	--	--	--	--	--	--	--	--
520	Cluster-9677.0	2659	10814032	XP_022179843.1	728	7.4e-74	protein nubbin-like isoform X1 [Myzus persicae]	XM_008182116.2	XM_008182116	1948	0	PREDICTED: Acyrthosiphon pisum uncharacterized LOC100569770 (LOC100569770), transcript variant X1, mRNA	--	--	--	--	--	--	--	--	PF12052	Voltage gated calcium channel subunit beta domain 4Aa N terminal	GO:0006816//GO:0070588	calcium ion transport//calcium ion transmembrane transport	GO:0005245	voltage-gated calcium channel activity	GO:0005891	voltage-gated calcium channel complex	--	--
521	Cluster-4199.0	431	--	--	--	--	--	--	--	--	--	--	--	--	--	--	--	--	--	--	--	--	--	--	--	--	--	--	--	--
522	Cluster-6161.0	668	--	--	--	--	--	--	--	--	--	--	--	--	--	--	--	--	--	--	--	--	--	--	--	--	--	--	--	--
523	Cluster-6944.0	948	--	--	--	--	--	--	--	--	--	--	--	--	--	--	--	--	--	--	--	--	--	--	--	--	--	--	--	--
524	Cluster-8351.0	1500	1167155	XP_001944728.1	1907	8.1e-211	PREDICTED: uncharacterized protein LOC100160165 [Acyrthosiphon pisum]	XM_001944693.4	XM_001944693	1095	0	PREDICTED: Acyrthosiphon pisum uncharacterized LOC100160165 (LOC100160165), mRNA	--	--	--	--	--	--	--	--	PF15966//PF00646//PF12937	F-box//F-box domain//F-box-like	--	--	GO:0005515	protein binding	--	--	--	--
525	Cluster-6765.0	2513	10799069	XP_022163321.1	726	1.2e-73	uncharacterized protein LOC111028859 [Myzus persicae]	XM_003248211.2	XM_003248211	238	7.4e-119	PREDICTED: Acyrthosiphon pisum uncharacterized LOC100572432 (LOC100572432), partial mRNA	--	--	--	--	--	--	--	--	--	--	--	--	--	--	--	--	--	--
526	Cluster-11381.0	853	10800151	XP_022164534.1	748	1.1e-76	uncharacterized protein LOC111029708 [Myzus persicae]	XM_016806666.1	XM_016806666	212	6.95e-105	PREDICTED: Acyrthosiphon pisum uncharacterized LOC107884481 (LOC107884481), mRNA	--	--	--	--	--	--	--	--	--	--	--	--	--	--	--	--	--	--
527	Cluster-1225.0	1699	1166933	XP_001943645.1	1819	1.5e-200	PREDICTED: ATPase family AAA domain-containing protein 1-B [Acyrthosiphon pisum]	XM_001943610.3	XM_001943610	1463	0	PREDICTED: Acyrthosiphon pisum ATPase family AAA domain-containing protein 1-B (LOC100161033), mRNA	--	--	--	--	Q503W7	955	8.4e-102	ATPase family AAA domain-containing protein 1-B OS=Danio rerio OX=7955 GN=atad1b PE=2 SV=2	PF00004//PF06414//PF07724//PF05496//PF07728//PF06068//PF14532//PF02367//PF03969//PF01443//PF00910//PF01695	ATPase family associated with various cellular activities (AAA)//Zeta toxin//AAA domain (Cdc48 subfamily)//Holliday junction DNA helicase ruvB N-terminus//AAA domain (dynein-related subfamily)//TIP49 C-terminus//Sigma-54 interaction domain//Threonylcarbamoyl adenosine biosynthesis protein TsaE//AFG1-like ATPase//Viral (Superfamily 1) RNA helicase//RNA helicase//IstB-like ATP binding protein	GO:0006310//GO:0002949//GO:0006281//GO:0006355	DNA recombination//tRNA threonylcarbamoyladenosine modification//DNA repair//regulation of transcription, DNA-templated	GO:0003723//GO:0016301//GO:0003678//GO:0016887//GO:0009378//GO:0003724//GO:0005524//GO:0008134	RNA binding//kinase activity//DNA helicase activity//ATPase activity//four-way junction helicase activity//RNA helicase activity//ATP binding//transcription factor binding	GO:0009379//GO:0005657//GO:0005667	Holliday junction helicase complex//replication fork//transcription factor complex	KOG0737	AAA+-type ATPase
528	Cluster-11050.0	430	--	--	--	--	--	XM_016806601.1	XM_016806601	75	4.83e-29	PREDICTED: Acyrthosiphon pisum probable peroxisomal acyl-coenzyme A oxidase 1 (LOC100159207), mRNA	--	--	--	--	--	--	--	--	--	--	--	--	--	--	--	--	--	--
529	Cluster-13158.0	1397	4411476	XP_008186599.1	1764	2.9e-194	PREDICTED: atrial natriuretic peptide receptor 2 [Acyrthosiphon pisum]	XM_008188377.2	XM_008188377	1101	0	PREDICTED: Acyrthosiphon pisum atrial natriuretic peptide receptor 2 (LOC100166215), mRNA	K12323	ANPRA, NPR1	atrial natriuretic peptide receptor A	http://www.genome.jp/dbget-bin/www_bget?ko:K12323	P16066	1131	2.7e-122	Atrial natriuretic peptide receptor 1 OS=Homo sapiens OX=9606 GN=NPR1 PE=1 SV=1	PF07701//PF00211//PF07714//PF00692	Heme NO binding associated//Adenylate and Guanylate cyclase catalytic domain//Protein tyrosine kinase//dUTPase	GO:0046039//GO:0035556//GO:0006144//GO:0009190//GO:0006182//GO:0046080//GO:0006468	GTP metabolic process//intracellular signal transduction//purine nucleobase metabolic process//cyclic nucleotide biosynthetic process//cGMP biosynthetic process//dUTP metabolic process//protein phosphorylation	GO:0016849//GO:0004672//GO:0004383//GO:0016787	phosphorus-oxygen lyase activity//protein kinase activity//guanylate cyclase activity//hydrolase activity	--	--	KOG1023	Natriuretic peptide receptor, guanylate cyclase
530	Cluster-4251.1	441	4411424	XP_001946388.3	786	2.3e-81	PREDICTED: WD repeat-containing protein 62 [Acyrthosiphon pisum]	XM_001946353.4	XM_001946353	423	0	PREDICTED: Acyrthosiphon pisum WD repeat-containing protein 62 (LOC100166454), mRNA	--	--	--	--	Q6NS57	386	2.1e-36	Mitogen-activated protein kinase-binding protein 1 OS=Mus musculus OX=10090 GN=Mapkbp1 PE=1 SV=1	PF00400	WD domain, G-beta repeat	--	--	GO:0005515	protein binding	--	--	KOG1408	WD40 repeat protein
531	Cluster-3203.0	520	--	--	--	--	--	CP017979.1	CP017979	520	0	Escherichia coli str. K-12 substr. W3110 substrain ZK126 genome	--	--	--	--	P39404	672	1.7e-69	Transcriptional activator protein BglJ OS=Escherichia coli (strain K12) OX=83333 GN=bglJ PE=1 SV=3	--	--	--	--	--	--	--	--	--	--
532	Cluster-12904.0	684	--	--	--	--	--	--	--	--	--	--	--	--	--	--	--	--	--	--	--	--	--	--	--	--	--	--	--	--
533	Cluster-12379.0	2845	8345555	XP_016659547.1	4168	0	PREDICTED: uncharacterized protein LOC100570891 [Acyrthosiphon pisum]	XM_016804058.1	XM_016804058	2572	0	PREDICTED: Acyrthosiphon pisum uncharacterized LOC100570891 (LOC100570891), transcript variant X2, mRNA	--	--	--	--	--	--	--	--	--	--	--	--	--	--	--	--	--	--
534	Cluster-12379.1	1108	10803443	XP_022168182.1	1338	5.7e-145	uncharacterized protein LOC111032228 [Myzus persicae]	XM_003244218.3	XM_003244218	938	0	PREDICTED: Acyrthosiphon pisum uncharacterized LOC100570891 (LOC100570891), transcript variant X1, mRNA	--	--	--	--	--	--	--	--	--	--	--	--	--	--	--	--	--	--
535	Cluster-2723.0	394	--	--	--	--	--	--	--	--	--	--	--	--	--	--	--	--	--	--	--	--	--	--	--	--	--	--	--	--
536	Cluster-3675.0	322	--	--	--	--	--	XM_003242300.3	XM_003242300	202	8.89e-100	PREDICTED: Acyrthosiphon pisum uncharacterized LOC100163696 (LOC100163696), transcript variant X2, mRNA	--	--	--	--	--	--	--	--	--	--	--	--	--	--	--	--	--	--
537	Cluster-5111.0	655	8347504	XP_016660015.1	1071	3e-114	PREDICTED: tRNA modification GTPase GTPBP3, mitochondrial isoform X1 [Acyrthosiphon pisum]	XM_001945949.4	XM_001945949	583	0	PREDICTED: Acyrthosiphon pisum tRNA modification GTPase GTPBP3, mitochondrial (LOC100160304), transcript variant X2, mRNA	K03650	mnmE, trmE, MSS1	tRNA modification GTPase	http://www.genome.jp/dbget-bin/www_bget?ko:K03650	Q501Z5	355	1.2e-32	tRNA modification GTPase GTPBP3, mitochondrial OS=Danio rerio OX=7955 GN=gtpbp3 PE=2 SV=1	PF00025//PF08477//PF01926//PF03193//PF00005//PF00448//PF04548//PF00071//PF02263//PF02421	ADP-ribosylation factor family//Ras of Complex, Roc, domain of DAPkinase//50S ribosome-binding GTPase//Protein of unknown function, DUF258//ABC transporter//SRP54-type protein, GTPase domain//AIG1 family//Ras family//Guanylate-binding protein, N-terminal domain//Ferrous iron transport protein B	GO:0015684//GO:0006614//GO:0007264	ferrous iron transport//SRP-dependent cotranslational protein targeting to membrane//small GTPase mediated signal transduction	GO:0016887//GO:0003924//GO:0005524//GO:0005525//GO:0015093	ATPase activity//GTPase activity//ATP binding//GTP binding//ferrous iron transmembrane transporter activity	GO:0016021	integral component of membrane	KOG1191	Mitochondrial GTPase
538	Cluster-11557.0	957	--	--	--	--	--	XM_008189945.1	XM_008189945	179	1.73e-86	PREDICTED: Acyrthosiphon pisum kynurenine/alpha-aminoadipate aminotransferase, mitochondrial (LOC100569638), mRNA	--	--	--	--	--	--	--	--	--	--	--	--	--	--	--	--	--	--
539	Cluster-3194.0	315	--	--	--	--	--	--	--	--	--	--	--	--	--	--	--	--	--	--	--	--	--	--	--	--	--	--	--	--
540	Cluster-11194.0	427	2772466	GAA58004.1	313	1.6e-26	50S ribosomal protein L6 [Clonorchis sinensis]	LT632320.1	LT632320	427	0	Escherichia coli strain NCTC 13441 genome assembly, chromosome: 1	--	--	--	--	A6TEV6	435	4.2e-42	50S ribosomal protein L18 OS=Klebsiella pneumoniae subsp. pneumoniae (strain ATCC 700721 / MGH 78578) OX=272620 GN=rplR PE=3 SV=1	PF00861	Ribosomal L18p/L5e family	GO:0006412//GO:0042254	translation//ribosome biogenesis	GO:0003735	structural constituent of ribosome	GO:0005622//GO:0005840	intracellular//ribosome	--	--
541	Cluster-2020.0	311	--	--	--	--	--	XM_008184533.2	XM_008184533	100	4.3e-43	PREDICTED: Acyrthosiphon pisum protein deltex (LOC100160891), transcript variant X3, mRNA	--	--	--	--	--	--	--	--	--	--	--	--	--	--	--	--	--	--
542	Cluster-9909.0	1864	7697825	XP_015370310.1	1822	7.2e-201	PREDICTED: guanine nucleotide-binding protein G..i.. subunit alpha [Diuraphis noxia]	XM_001945082.4	XM_001945082	1515	0	PREDICTED: Acyrthosiphon pisum guanine nucleotide-binding protein G(i) subunit alpha (LOC100164033), mRNA	K04630	GNAI	guanine nucleotide-binding protein G(i) subunit alpha	http://www.genome.jp/dbget-bin/www_bget?ko:K04630	P41776	1559	8.5e-172	Guanine nucleotide-binding protein G(i) subunit alpha OS=Homarus americanus OX=6706 PE=2 SV=2	PF04670//PF10584//PF00503//PF08477//PF00025//PF01580	Gtr1/RagA G protein conserved region//Proteasome subunit A N-terminal signature//G-protein alpha subunit//Ras of Complex, Roc, domain of DAPkinase//ADP-ribosylation factor family//FtsK/SpoIIIE family	GO:0007186//GO:0007264//GO:0006511//GO:0007165	G-protein coupled receptor signaling pathway//small GTPase mediated signal transduction//ubiquitin-dependent protein catabolic process//signal transduction	GO:0003677//GO:0019001//GO:0005524//GO:0003924//GO:0004871//GO:0004175//GO:0005525//GO:0000166//GO:0031683	DNA binding//guanyl nucleotide binding//ATP binding//GTPase activity//signal transducer activity//endopeptidase activity//GTP binding//nucleotide binding//G-protein beta/gamma-subunit complex binding	GO:0019773	proteasome core complex, alpha-subunit complex	KOG0082	G-protein alpha subunit (small G protein superfamily)
543	Cluster-11871.0	642	8331455	XP_016665055.1	957	5e-101	PREDICTED: uncharacterized protein LOC100573032 isoform X2 [Acyrthosiphon pisum]	XM_016809566.1	XM_016809566	580	0	PREDICTED: Acyrthosiphon pisum uncharacterized LOC100573032 (LOC100573032), transcript variant X2, mRNA	--	--	--	--	--	--	--	--	--	--	--	--	--	--	--	--	--	--
544	Cluster-3959.2269	3925	2477159	XP_001948491.2	1986	1.5e-219	PREDICTED: uncharacterized protein LOC100162711 [Acyrthosiphon pisum]	XM_001948456.4	XM_001948456	1867	0	PREDICTED: Acyrthosiphon pisum uncharacterized LOC100162711 (LOC100162711), mRNA	--	--	--	--	--	--	--	--	--	--	--	--	--	--	--	--	--	--
545	Cluster-1637.0	594	8349282	XP_016661532.1	706	5.8e-72	PREDICTED: disks large homolog 5-like [Acyrthosiphon pisum]	XM_016806831.1	XM_016806831	543	0	PREDICTED: Acyrthosiphon pisum disks large homolog 5 (LOC100167270), transcript variant X2, mRNA	--	--	--	--	E9Q9R9	135	3.6e-07	Disks large homolog 5 OS=Mus musculus OX=10090 GN=Dlg5 PE=1 SV=1	PF13851//PF06005//PF02183//PF16740//PF04111//PF08702//PF07926//PF10473	Growth-arrest specific micro-tubule binding//Protein of unknown function (DUF904)//Homeobox associated leucine zipper//Spindle and kinetochore-associated protein 2//Autophagy protein Apg6//Fibrinogen alpha/beta chain family//TPR/MLP1/MLP2-like protein//Leucine-rich repeats of kinetochore protein Cenp-F/LEK1	GO:0007059//GO:0006606//GO:0031110//GO:0007067//GO:0051301//GO:0043093//GO:0030168//GO:0006355//GO:0000917//GO:0000090//GO:0048870//GO:0007165//GO:0051258//GO:0006914	chromosome segregation//protein import into nucleus//regulation of microtubule polymerization or depolymerization//mitotic nuclear division//cell division//FtsZ-dependent cytokinesis//platelet activation//regulation of transcription, DNA-templated//barrier septum assembly//mitotic anaphase//cell motility//signal transduction//protein polymerization//autophagy	GO:0008134//GO:0045502//GO:0008017//GO:0005102//GO:0030674//GO:0043565//GO:0042803//GO:0003700	transcription factor binding//dynein binding//microtubule binding//receptor binding//protein binding, bridging//sequence-specific DNA binding//protein homodimerization activity//transcription factor activity, sequence-specific DNA binding	GO:0031514//GO:0005876//GO:0005737//GO:0045298//GO:0005667//GO:0000940//GO:0005577//GO:0030286	motile cilium//spindle microtubule//cytoplasm//tubulin complex//transcription factor complex//condensed chromosome outer kinetochore//fibrinogen complex//dynein complex	--	--
546	Cluster-12744.1	306	4581647	CDW57979.1	556	7.5e-55	PapD C and Fimbrial and PapD N domain containing protein [Trichuris trichiura]	CP013031.1	CP013031	306	1.29e-157	Escherichia coli strain H1827/12, complete genome	--	--	--	--	P75748	552	8.2e-56	Uncharacterized protein YbgO OS=Escherichia coli (strain K12) OX=83333 GN=ybgO PE=3 SV=2	PF05187	Electron transfer flavoprotein-ubiquinone oxidoreductase, 4Fe-4S	GO:0055114	oxidation-reduction process	GO:0004174	electron-transferring-flavoprotein dehydrogenase activity	--	--	--	--
547	Cluster-8705.0	1785	--	--	--	--	--	AK342757.1	AK342757	149	1.56e-69	Acyrthosiphon pisum mRNA, clone: 585G5, full-insert cDNA sequence based on the ESTs (5'-EST:FF322341, 3'-EST:FF323241)	--	--	--	--	--	--	--	--	--	--	--	--	--	--	--	--	--	--
548	Cluster-7337.0	2151	2477088	XP_003245252.1	1940	1.7e-214	PREDICTED: suppressor of cytokine signaling 5 [Acyrthosiphon pisum]	XM_003245204.3	XM_003245204	1830	0	PREDICTED: Acyrthosiphon pisum suppressor of cytokine signaling 5 (LOC100572991), mRNA	K04698	SOCS5	suppressor of cytokine signaling 5	http://www.genome.jp/dbget-bin/www_bget?ko:K04698	O75159	649	3.3e-66	Suppressor of cytokine signaling 5 OS=Homo sapiens OX=9606 GN=SOCS5 PE=1 SV=1	PF01586//PF07525	Myogenic Basic domain//SOCS box	GO:0035556//GO:0006355//GO:0007517	intracellular signal transduction//regulation of transcription, DNA-templated//muscle organ development	GO:0003677	DNA binding	GO:0005634	nucleus	--	--
549	Cluster-8442.0	3158	1116414	NP_001119606.1	4256	0	membrane alanyl aminopeptidase N precursor [Acyrthosiphon pisum]	NM_001126134.2	NM_001126134	2518	0	Acyrthosiphon pisum membrane alanyl aminopeptidase N (LOC100144773), mRNA	K11140	ANPEP	aminopeptidase N	http://www.genome.jp/dbget-bin/www_bget?ko:K11140	P91885	1055	4e-113	Aminopeptidase N OS=Manduca sexta OX=7130 GN=APN2 PE=1 SV=2	PF01433	Peptidase family M1	--	--	GO:0008270//GO:0008237	zinc ion binding//metallopeptidase activity	--	--	--	--
550	Cluster-7884.0	2737	7695655	XP_015367904.1	3178	0	PREDICTED: NADP-dependent malic enzyme-like [Diuraphis noxia]	XM_001944232.4	XM_001944232	2469	0	PREDICTED: Acyrthosiphon pisum NADP-dependent malic enzyme (LOC100165091), mRNA	K00029	E1.1.1.40, maeB	malate dehydrogenase (oxaloacetate-decarboxylating)(NADP+)	http://www.genome.jp/dbget-bin/www_bget?ko:K00029	P28227	1738	2.2e-192	NADP-dependent malic enzyme OS=Anas platyrhynchos OX=8839 GN=ME1 PE=1 SV=1	PF00390//PF03949//PF01956	Malic enzyme, N-terminal domain//Malic enzyme, NAD binding domain//Integral membrane protein DUF106	GO:0006108//GO:0055114//GO:0015976//GO:0006090//GO:0006099	malate metabolic process//oxidation-reduction process//carbon utilization//pyruvate metabolic process//tricarboxylic acid cycle	GO:0051287//GO:0004471	NAD binding//malate dehydrogenase (decarboxylating) (NAD+) activity	GO:0016020	membrane	KOG1257	NADP+-dependent malic enzyme
551	Cluster-11782.0	2594	10802129	XP_022166718.1	1965	2.6e-217	PR domain zinc finger protein 13-like [Myzus persicae]	XM_016809225.1	XM_016809225	1725	0	PREDICTED: Acyrthosiphon pisum uncharacterized LOC100569768 (LOC100569768), mRNA	--	--	--	--	A6NHJ4	169	1.8e-10	Zinc finger protein 860 OS=Homo sapiens OX=9606 GN=ZNF860 PE=1 SV=3	PF13465//PF00096	Zinc-finger double domain//Zinc finger, C2H2 type	--	--	GO:0046872	metal ion binding	--	--	--	--
552	Cluster-6507.0	1529	7690033	XP_015379130.1	820	9.1e-85	PREDICTED: protein charybde-like [Diuraphis noxia]	NM_001162254.2	NM_001162254	1209	0	Acyrthosiphon pisum DNA damage-inducible transcript 4-like (LOC100166939), mRNA	--	--	--	--	Q2LZ58	315	1.2e-27	Protein charybde OS=Drosophila pseudoobscura pseudoobscura OX=46245 GN=chrb PE=2 SV=1	PF07809	RTP801 C-terminal region	GO:0009968	negative regulation of signal transduction	--	--	GO:0005737	cytoplasm	--	--
553	Cluster-8264.0	660	--	--	--	--	--	--	--	--	--	--	--	--	--	--	--	--	--	--	--	--	--	--	--	--	--	--	--	--
554	Cluster-3959.2598	2689	8339557	XP_016657936.1	3176	0	PREDICTED: glucose dehydrogenase [FAD, quinone] [Acyrthosiphon pisum]	XM_001952630.4	XM_001952630	2122	0	PREDICTED: Acyrthosiphon pisum glucose dehydrogenase [FAD, quinone] (LOC100168708), transcript variant X2, mRNA	--	--	--	--	P18173	947	1.1e-100	Glucose dehydrogenase [FAD, quinone] OS=Drosophila melanogaster OX=7227 GN=Gld PE=3 SV=3	PF05834//PF05199//PF07992//PF01266//PF00732	Lycopene cyclase protein//GMC oxidoreductase//Pyridine nucleotide-disulphide oxidoreductase//FAD dependent oxidoreductase//GMC oxidoreductase	GO:0016117//GO:0055114	carotenoid biosynthetic process//oxidation-reduction process	GO:0016614//GO:0016705//GO:0050660//GO:0016491	oxidoreductase activity, acting on CH-OH group of donors//oxidoreductase activity, acting on paired donors, with incorporation or reduction of molecular oxygen//flavin adenine dinucleotide binding//oxidoreductase activity	--	--	--	--
555	Cluster-3959.2599	3212	2478543	XP_001949657.2	3970	0	PREDICTED: glycogen debranching enzyme isoform X3 [Acyrthosiphon pisum]	XM_001949622.4	XM_001949622	2518	0	PREDICTED: Acyrthosiphon pisum glycogen debranching enzyme (LOC100159564), transcript variant X5, mRNA	K01196	AGL	glycogen debranching enzyme	http://www.genome.jp/dbget-bin/www_bget?ko:K01196	Q2PQH8	1761	5.5e-195	Glycogen debranching enzyme OS=Canis lupus familiaris OX=9615 GN=AGL PE=2 SV=1	--	--	--	--	--	--	--	--	KOG3625	Alpha amylase
556	Cluster-2094.0	971	10813492	XP_022179243.1	952	2.9e-100	programmed cell death protein 6 [Myzus persicae]	NM_001162158.1	AK339975	770	0	Acyrthosiphon pisum apoptosis-linked protein 2-like (LOC100164510), mRNA >dbj|AK339975.1| Acyrthosiphon pisum ACYPI005521 mRNA, clone: 587M23, complete cds, full-insert cDNA sequence based on the ESTs (5'-EST:FF322375, 3'-EST:FF324144)	--	--	--	--	P12815	591	7.8e-60	Programmed cell death protein 6 OS=Mus musculus OX=10090 GN=Pdcd6 PE=1 SV=2	PF13405//PF13833//PF13499//PF13202//PF00036	EF-hand domain//EF-hand domain pair//EF-hand domain pair//EF hand//EF hand	--	--	GO:0005509	calcium ion binding	--	--	KOG0037	Ca2+-binding protein, EF-Hand protein superfamily
557	Cluster-9915.1	1148	10807117	XP_022172236.1	1529	4.2e-167	oxysterol-binding protein-related protein 9 [Myzus persicae]	XM_008183979.2	XM_008183979	638	0	PREDICTED: Acyrthosiphon pisum oxysterol-binding protein-related protein 9 (LOC100166798), mRNA	--	--	--	--	Q96SU4	531	8.4e-53	Oxysterol-binding protein-related protein 9 OS=Homo sapiens OX=9606 GN=OSBPL9 PE=1 SV=2	--	--	--	--	--	--	--	--	KOG2210	Oxysterol-binding protein
558	Cluster-9667.0	332	7699777	XP_015372488.1	338	1.5e-29	PREDICTED: major facilitator superfamily domain-containing protein 6-like isoform X1 [Diuraphis noxia]	XM_003246249.3	XM_003246249	287	5.16e-147	PREDICTED: Acyrthosiphon pisum major facilitator superfamily domain-containing protein 6 (LOC100167487), transcript variant X5, mRNA	--	--	--	--	--	--	--	--	PF07690	Major Facilitator Superfamily	GO:0055085	transmembrane transport	--	--	GO:0016021	integral component of membrane	--	--
559	Cluster-2607.0	675	--	--	--	--	--	--	--	--	--	--	--	--	--	--	--	--	--	--	--	--	--	--	--	--	--	--	--	--
560	Cluster-3959.2591	3365	2477853	XP_001946070.2	2887	0	PREDICTED: DEP domain-containing protein DDB_G0279099 [Acyrthosiphon pisum]	XM_001946035.4	XM_001946035	1406	0	PREDICTED: Acyrthosiphon pisum DEP domain-containing protein DDB_G0279099 (LOC100169018), mRNA	--	--	--	--	--	--	--	--	PF01607	Chitin binding Peritrophin-A domain	GO:0006030	chitin metabolic process	GO:0008061	chitin binding	GO:0005576	extracellular region	--	--
561	Cluster-3959.2592	521	--	--	--	--	--	--	--	--	--	--	--	--	--	--	--	--	--	--	--	--	--	--	--	--	--	--	--	--
562	Cluster-3959.2593	715	10804564	XP_022169412.1	480	1.1e-45	uncharacterized protein LOC111033123 isoform X1 [Myzus persicae]	XM_016805793.1	XM_016805793	493	0	PREDICTED: Acyrthosiphon pisum uncharacterized LOC107884179 (LOC107884179), mRNA	--	--	--	--	--	--	--	--	--	--	--	--	--	--	--	--	--	--
563	Cluster-288.0	375	--	--	--	--	--	--	--	--	--	--	--	--	--	--	--	--	--	--	--	--	--	--	--	--	--	--	--	--
564	Cluster-3959.2595	1734	4458125	NP_001280464.1	688	2.1e-69	ATP synthase subunit delta, mitochondrial [Acyrthosiphon pisum]	NM_001293535.1	NM_001293535	850	0	Acyrthosiphon pisum ATP synthase subunit delta, mitochondrial (LOC100166122), mRNA	K02134	ATPeF1D, ATP5D, ATP16	F-type H+-transporting ATPase subunit delta	http://www.genome.jp/dbget-bin/www_bget?ko:K02134	Q9D3D9	330	2.6e-29	ATP synthase subunit delta, mitochondrial OS=Mus musculus OX=10090 GN=Atp5f1d PE=1 SV=1	PF02823	ATP synthase, Delta/Epsilon chain, beta-sandwich domain	GO:0015986//GO:0015992//GO:0006119	ATP synthesis coupled proton transport//proton transport//oxidative phosphorylation	GO:0046961//GO:0046933	proton-transporting ATPase activity, rotational mechanism//proton-transporting ATP synthase activity, rotational mechanism	GO:0045261//GO:0045259	proton-transporting ATP synthase complex, catalytic core F(1)//proton-transporting ATP synthase complex	KOG1758	Mitochondrial F1F0-ATP synthase, subunit delta/ATP16
565	Cluster-3959.2596	449	--	--	--	--	--	--	--	--	--	--	--	--	--	--	--	--	--	--	PF02535//PF03964	ZIP Zinc transporter//Chorion family 2	GO:0007275//GO:0055085//GO:0030001	multicellular organismal development//transmembrane transport//metal ion transport	GO:0046873	metal ion transmembrane transporter activity	GO:0042600//GO:0016020	chorion//membrane	--	--
566	Cluster-3959.2597	1999	10796193	XP_022160142.1	373	8.1e-33	alpha-protein kinase 1-like [Myzus persicae]	XM_008183656.2	XM_008183656	1574	0	PREDICTED: Acyrthosiphon pisum SSXT-domain containing protein (LOC100166216), transcript variant X1, mRNA	K15623	SS18, SSXT, SYT	protein SSXT	http://www.genome.jp/dbget-bin/www_bget?ko:K15623	O75177	220	1.7e-16	Calcium-responsive transactivator OS=Homo sapiens OX=9606 GN=SS18L1 PE=1 SV=2	PF01080//PF07565//PF08496//PF02724//PF03348//PF06459	Presenilin//Band 3 cytoplasmic domain//Peptidase family S49 N-terminal//CDC45-like protein//Serine incorporator (Serinc)//Ryanodine Receptor TM 4-6	GO:0006270//GO:0006816//GO:0006820//GO:0006874	DNA replication initiation//calcium ion transport//anion transport//cellular calcium ion homeostasis	GO:0004252//GO:0005219//GO:0008509//GO:0004190	serine-type endopeptidase activity//ryanodine-sensitive calcium-release channel activity//anion transmembrane transporter activity//aspartic-type endopeptidase activity	GO:0005622//GO:0016020//GO:0016021//GO:0005886	intracellular//membrane//integral component of membrane//plasma membrane	KOG3227	Calcium-responsive transcription coactivator
567	Cluster-12050.0	433	--	--	--	--	--	--	--	--	--	--	--	--	--	--	--	--	--	--	--	--	--	--	--	--	--	--	--	--
568	Cluster-4091.0	2029	--	--	--	--	--	--	--	--	--	--	--	--	--	--	--	--	--	--	--	--	--	--	--	--	--	--	--	--
569	Cluster-4766.0	418	--	--	--	--	--	XM_016807307.1	XM_016807307	148	1.23e-69	PREDICTED: Acyrthosiphon pisum uncharacterized LOC100568776 (LOC100568776), transcript variant X3, mRNA	--	--	--	--	--	--	--	--	--	--	--	--	--	--	--	--	--	--
570	Cluster-11955.0	408	--	--	--	--	--	--	--	--	--	--	--	--	--	--	--	--	--	--	--	--	--	--	--	--	--	--	--	--
571	Cluster-9324.0	924	10810651	XP_022176125.1	1032	1.4e-109	DNA damage-binding protein 1 [Myzus persicae]	XM_008184638.2	XM_008184638	706	0	PREDICTED: Acyrthosiphon pisum DNA damage-binding protein 1 (LOC100165978), transcript variant X2, mRNA	K10610	DDB1	DNA damage-binding protein 1	http://www.genome.jp/dbget-bin/www_bget?ko:K10610	P33194	592	5.7e-60	DNA damage-binding protein 1 OS=Chlorocebus aethiops OX=9534 GN=DDB1 PE=1 SV=1	--	--	--	--	--	--	--	--	KOG1897	Damage-specific DNA binding complex, subunit DDB1
572	Cluster-10064.0	349	--	--	--	--	--	--	--	--	--	--	--	--	--	--	--	--	--	--	--	--	--	--	--	--	--	--	--	--
573	Cluster-3993.0	531	--	--	--	--	--	--	--	--	--	--	--	--	--	--	--	--	--	--	--	--	--	--	--	--	--	--	--	--
574	Cluster-10141.0	524	4578898	CDW60734.1	954	9e-101	Alpha-amylase C and Alpha-amylase and CBM 48 doma in containing protein [Trichuris trichiura]	CP013031.1	CP013031	524	0	Escherichia coli strain H1827/12, complete genome	--	--	--	--	A8A5P1	954	3.4e-102	Glycogen debranching enzyme OS=Escherichia coli O9:H4 (strain HS) OX=331112 GN=glgX PE=3 SV=1	--	--	--	--	--	--	--	--	--	--
575	Cluster-5942.0	1796	1168700	XP_001943359.1	2353	1.9e-262	PREDICTED: zinc finger protein 660 isoform X1 [Acyrthosiphon pisum]	XM_001943324.4	XM_001943324	1420	0	PREDICTED: Acyrthosiphon pisum zinc finger protein 660 (LOC100161280), transcript variant X1, mRNA	--	--	--	--	P17020	223	6.8e-17	Zinc finger protein 16 OS=Homo sapiens OX=9606 GN=ZNF16 PE=1 SV=3	PF00096//PF07776//PF06467//PF06689//PF16622//PF13465//PF13912//PF01199	Zinc finger, C2H2 type//Zinc-finger associated domain (zf-AD)//MYM-type Zinc finger with FCS sequence motif//ClpX C4-type zinc finger//zinc-finger C2H2-type//Zinc-finger double domain//C2H2-type zinc finger//Ribosomal protein L34e	GO:0006412//GO:0042254	translation//ribosome biogenesis	GO:0003735//GO:0046983//GO:0046872//GO:0008270	structural constituent of ribosome//protein dimerization activity//metal ion binding//zinc ion binding	GO:0005634//GO:0005840//GO:0005622	nucleus//ribosome//intracellular	--	--
576	Cluster-11783.0	755	2475414	XP_003242592.1	536	3.8e-52	PREDICTED: venom serine carboxypeptidase [Acyrthosiphon pisum]	XM_003242544.3	XM_003242544	463	0	PREDICTED: Acyrthosiphon pisum venom serine carboxypeptidase (LOC100166597), mRNA	K09645	CPVL	vitellogenic carboxypeptidase-like protein	http://www.genome.jp/dbget-bin/www_bget?ko:K09645	C9WMM5	251	1.6e-20	Venom serine carboxypeptidase OS=Apis mellifera OX=7460 PE=2 SV=1	PF00450	Serine carboxypeptidase	GO:0006508	proteolysis	GO:0004185	serine-type carboxypeptidase activity	--	--	KOG1282	Serine carboxypeptidases (lysosomal cathepsin A)
577	Cluster-7659.0	1565	4415447	XP_008183818.1	1841	3.8e-203	PREDICTED: cell-death-related nuclease 7 [Acyrthosiphon pisum]	XM_008185596.2	XM_008185596	1065	0	PREDICTED: Acyrthosiphon pisum cell-death-related nuclease 7 (LOC100161890), mRNA	K01158	DNASE2	deoxyribonuclease II	http://www.genome.jp/dbget-bin/www_bget?ko:K01158	P34387	531	1.1e-52	Cell-death-related nuclease 7 OS=Caenorhabditis elegans OX=6239 GN=crn-7 PE=2 SV=2	PF03265	Deoxyribonuclease II	GO:0006308//GO:0006259	DNA catabolic process//DNA metabolic process	GO:0004531	deoxyribonuclease II activity	--	--	KOG3825	Deoxyribonuclease II
578	Cluster-8631.0	621	2474749	XP_003241405.1	846	3.6e-88	PREDICTED: transcriptional regulator ATRX homolog [Acyrthosiphon pisum]	XM_015520892.1	XM_015520892	437	0	PREDICTED: Diuraphis noxia transcriptional regulator ATRX homolog (LOC107170708), mRNA	--	--	--	--	--	--	--	--	--	--	--	--	--	--	--	--	--	--
579	Cluster-5395.0	594	8351863	XP_016664099.1	934	2.1e-98	PREDICTED: transmembrane protease serine 4 [Acyrthosiphon pisum]	XM_016808610.1	XM_016808610	473	0	PREDICTED: Acyrthosiphon pisum transmembrane protease serine 4 (LOC100575039), mRNA	--	--	--	--	Q9JJS8	176	6.3e-12	Mannan-binding lectin serine protease 2 OS=Rattus norvegicus OX=10116 GN=Masp2 PE=1 SV=2	PF00089	Trypsin	GO:0006508	proteolysis	GO:0004252	serine-type endopeptidase activity	--	--	--	--
580	Cluster-3669.0	1678	2476541	XP_001945835.2	1931	1.5e-213	PREDICTED: probable vesicular glutamate transporter eat-4 isoform X1 [Acyrthosiphon pisum]	XM_003244421.3	XM_003244421	1170	0	PREDICTED: Acyrthosiphon pisum probable vesicular glutamate transporter eat-4 (LOC100574647), mRNA	--	--	--	--	Q9P2U8	190	4.2e-13	Vesicular glutamate transporter 2 OS=Homo sapiens OX=9606 GN=SLC17A6 PE=2 SV=1	--	--	--	--	--	--	--	--	KOG2532	Permease of the major facilitator superfamily
581	Cluster-374.0	2521	10837948	XP_022193293.1	2453	6.6e-274	calcium-binding mitochondrial carrier protein Aralar1 isoform X2 [Nilaparvata lugens]	NM_001205163.1	NM_001205163	2358	0	Acyrthosiphon pisum calcium-binding mitochondrial carrier protein Aralar1 (aralar1), mRNA	K15105	SLC25A12_13, AGC	solute carrier family 25 (mitochondrial aspartate/glutamate transporter), member 12/13	http://www.genome.jp/dbget-bin/www_bget?ko:K15105	Q9VA73	2206	1.1e-246	Calcium-binding mitochondrial carrier protein Aralar1 OS=Drosophila melanogaster OX=7227 GN=aralar1 PE=2 SV=1	PF13405//PF05739//PF13833//PF13499//PF10591//PF00036//PF13202	EF-hand domain//SNARE domain//EF-hand domain pair//EF-hand domain pair//Secreted protein acidic and rich in cysteine Ca binding region//EF hand//EF hand	GO:0007165	signal transduction	GO:0005515//GO:0005509	protein binding//calcium ion binding	GO:0005578	proteinaceous extracellular matrix	KOG0751	Mitochondrial aspartate/glutamate carrier protein Aralar/Citrin (contains EF-hand Ca2+-binding domains)
582	Cluster-6442.3	772	4411780	XP_008189910.1	202	2.1e-13	PREDICTED: uncharacterized protein LOC103311879 [Acyrthosiphon pisum]	AC203060.2	AC203060	183	8.28e-89	Acyrthosiphon pisum BAC VMRC38-30-A10 (Benaroya Research Institute VMRC38 Acrythosiphon pisum (Pea Aphid) BAC library) complete sequence	--	--	--	--	--	--	--	--	--	--	--	--	--	--	--	--	--	--
583	Cluster-7080.0	1826	8349556	XP_016661812.1	2427	4.9e-271	PREDICTED: probable asparagine--tRNA ligase, mitochondrial isoform X1 [Acyrthosiphon pisum]	XM_001945390.3	XM_001945390	1498	0	PREDICTED: Acyrthosiphon pisum probable asparagine--tRNA ligase, mitochondrial (LOC100160861), transcript variant X1, mRNA	K01893	NARS, asnS	asparaginyl-tRNA synthetase	http://www.genome.jp/dbget-bin/www_bget?ko:K01893	Q96I59	862	5.5e-91	Probable asparagine--tRNA ligase, mitochondrial OS=Homo sapiens OX=9606 GN=NARS2 PE=1 SV=3	PF01336//PF00152//PF01409	OB-fold nucleic acid binding domain//tRNA synthetases class II (D, K and N)//tRNA synthetases class II core domain (F)	GO:0006418//GO:0043039	tRNA aminoacylation for protein translation//tRNA aminoacylation	GO:0000049//GO:0000166//GO:0005524//GO:0003676//GO:0004812	tRNA binding//nucleotide binding//ATP binding//nucleic acid binding//aminoacyl-tRNA ligase activity	GO:0005737	cytoplasm	KOG0554	Asparaginyl-tRNA synthetase (mitochondrial)
584	Cluster-7485.0	449	--	--	--	--	--	XM_001952321.4	XM_001952321	178	2.8e-86	PREDICTED: Acyrthosiphon pisum tetratricopeptide repeat protein 5 (LOC100162807), transcript variant X1, mRNA	--	--	--	--	--	--	--	--	--	--	--	--	--	--	--	--	--	--
585	Cluster-8479.1	720	--	--	--	--	--	XM_008189648.1	XM_008189648	108	3.79e-47	PREDICTED: Acyrthosiphon pisum uncharacterized LOC103310656 (LOC103310656), mRNA	--	--	--	--	--	--	--	--	--	--	--	--	--	--	--	--	--	--
586	Cluster-4758.0	306	--	--	--	--	--	FP926962.1	FP926962	221	2.3e-110	Acyrthosiphon pisum mRNA, clone: ACI0AAC6YB18, full-insert cDNA sequence based on ESTs (5'-EST:ACI0AAC6YB18AAM1, 3'-EST ACI2AAC1YJ05BBM1)	--	--	--	--	--	--	--	--	--	--	--	--	--	--	--	--	--	--
587	Cluster-9154.0	1932	2477541	XP_003245957.1	2062	1.1e-228	PREDICTED: aspartate--tRNA ligase, cytoplasmic isoform X1 [Acyrthosiphon pisum]	NM_001160401.1	NM_001160401	1678	0	Acyrthosiphon pisum aspartyl-tRNA synthetase (Aats-asp), mRNA	K01876	DARS, aspS	aspartyl-tRNA synthetase	http://www.genome.jp/dbget-bin/www_bget?ko:K01876	Q922B2	1719	2.5e-190	Aspartate--tRNA ligase, cytoplasmic OS=Mus musculus OX=10090 GN=Dars PE=1 SV=2	PF01336//PF00152//PF01409	OB-fold nucleic acid binding domain//tRNA synthetases class II (D, K and N)//tRNA synthetases class II core domain (F)	GO:0043039//GO:0006418	tRNA aminoacylation//tRNA aminoacylation for protein translation	GO:0005524//GO:0003676//GO:0004812//GO:0000166//GO:0000049	ATP binding//nucleic acid binding//aminoacyl-tRNA ligase activity//nucleotide binding//tRNA binding	GO:0005737	cytoplasm	KOG0556	Aspartyl-tRNA synthetase
588	Cluster-7758.0	2687	10797866	XP_022161980.1	2764	6.1e-310	tyrosine-protein kinase Src42A [Myzus persicae]	XM_001944785.4	XM_001944785	2480	0	PREDICTED: Acyrthosiphon pisum tyrosine-protein kinase Src42A (LOC100160433), mRNA	K08892	FRK, PTK5	fyn-related kinase	http://www.genome.jp/dbget-bin/www_bget?ko:K08892	Q9V9J3	2210	4e-247	Tyrosine-protein kinase Src42A OS=Drosophila melanogaster OX=7227 GN=Src42A PE=1 SV=1	PF06293//PF07714//PF14604//PF00069//PF00018	Lipopolysaccharide kinase (Kdo/WaaP) family//Protein tyrosine kinase//Variant SH3 domain//Protein kinase domain//SH3 domain	GO:0006468	protein phosphorylation	GO:0005515//GO:0005524//GO:0004672//GO:0016773	protein binding//ATP binding//protein kinase activity//phosphotransferase activity, alcohol group as acceptor	GO:0016020	membrane	KOG0197	Tyrosine kinases
589	Cluster-6409.0	341	7563104	XP_015125535.1	264	6e-21	PREDICTED: outer membrane protein assembly factor BamC-like [Diachasma alloeum]	CP017979.1	CP017979	341	5.09e-177	Escherichia coli str. K-12 substr. W3110 substrain ZK126 genome	--	--	--	--	P0A904	382	4.7e-36	Outer membrane protein assembly factor BamC OS=Shigella flexneri OX=623 GN=bamC PE=3 SV=1	--	--	--	--	--	--	--	--	--	--
590	Cluster-11886.0	1061	2476789	XP_003244823.1	1125	2.7e-120	PREDICTED: uncharacterized protein LOC100575090 [Acyrthosiphon pisum]	XM_003244775.3	XM_003244775	729	0	PREDICTED: Acyrthosiphon pisum uncharacterized LOC100575090 (LOC100575090), mRNA	--	--	--	--	--	--	--	--	--	--	--	--	--	--	--	--	--	--
591	Cluster-9101.0	366	--	--	--	--	--	--	--	--	--	--	--	--	--	--	--	--	--	--	--	--	--	--	--	--	--	--	--	--
592	Cluster-7706.0	327	--	--	--	--	--	--	--	--	--	--	--	--	--	--	--	--	--	--	--	--	--	--	--	--	--	--	--	--
593	Cluster-11296.0	3521	2478010	XP_003246666.1	2583	7.8e-289	PREDICTED: G protein-activated inward rectifier potassium channel 3-like isoform X1 [Acyrthosiphon pisum]	XM_003246618.3	XM_003246618	1946	0	PREDICTED: Acyrthosiphon pisum G protein-activated inward rectifier potassium channel 3-like (LOC100166535), transcript variant X1, mRNA	K05330	KCNJN	potassium inwardly-rectifying channel subfamily J, other	http://www.genome.jp/dbget-bin/www_bget?ko:K05330	P49656	920	2e-97	Inward rectifier potassium channel 2 OS=Oryctolagus cuniculus OX=9986 GN=KCNJ2 PE=2 SV=1	PF00520//PF01007	Ion transport protein//Inward rectifier potassium channel	GO:0055085//GO:0006813//GO:0006811	transmembrane transport//potassium ion transport//ion transport	GO:0005242//GO:0005216	inward rectifier potassium channel activity//ion channel activity	GO:0016020//GO:0008076//GO:0016021	membrane//voltage-gated potassium channel complex//integral component of membrane	KOG3827	Inward rectifier K+ channel
594	Cluster-354.0	493	4579348	CDW60281.1	856	2e-89	OTCace N and OTCace domain containing protein [Trichuris trichiura]	CP012693.1	CP012693	493	0	Escherichia coli strain FORC_028, complete genome	K00611	OTC, argF, argI	ornithine carbamoyltransferase	http://www.genome.jp/dbget-bin/www_bget?ko:K00611	B1ISV4	860	2.5e-91	Ornithine carbamoyltransferase OS=Escherichia coli (strain ATCC 8739 / DSM 1576 / Crooks) OX=481805 GN=argI PE=3 SV=1	PF00185//PF02729	Aspartate/ornithine carbamoyltransferase, Asp/Orn binding domain//Aspartate/ornithine carbamoyltransferase, carbamoyl-P binding domain	GO:0006520	cellular amino acid metabolic process	GO:0016597//GO:0016743	amino acid binding//carboxyl- or carbamoyltransferase activity	--	--	KOG1504	Ornithine carbamoyltransferase OTC/ARG3
595	Cluster-3983.0	1557	10807446	XP_022172592.1	1107	4.9e-118	eukaryotic translation initiation factor 4H [Myzus persicae]	XM_001952529.4	XM_001952529	1374	0	PREDICTED: Acyrthosiphon pisum eukaryotic translation initiation factor 4H (LOC100167436), mRNA	--	--	--	--	Q9WUK2	309	6.3e-27	Eukaryotic translation initiation factor 4H OS=Mus musculus OX=10090 GN=Eif4h PE=1 SV=3	PF00076	RNA recognition motif. (a.k.a. RRM, RBD, or RNP domain)	--	--	GO:0003676	nucleic acid binding	--	--	KOG0118	FOG: RRM domain
596	Cluster-3959.2048	2731	2477730	XP_001952692.2	2960	0	PREDICTED: leucine-rich repeat-containing protein 15 [Acyrthosiphon pisum]	XM_001952657.4	XM_001952657	2047	0	PREDICTED: Acyrthosiphon pisum leucine-rich repeat-containing protein 15 (LOC100161188), mRNA	--	--	--	--	Q9VPF0	226	4.6e-17	Protein artichoke OS=Drosophila melanogaster OX=7227 GN=atk PE=1 SV=2	PF13855//PF00560	Leucine rich repeat//Leucine Rich Repeat	--	--	GO:0005515	protein binding	--	--	KOG0619	FOG: Leucine rich repeat
597	Cluster-3959.2049	1598	10793954	XP_022169262.1	542	1.6e-52	uncharacterized protein LOC111033022 [Myzus persicae]	AK343134.1	AK343134	241	1e-120	Acyrthosiphon pisum mRNA, clone: 287E7, full-insert cDNA sequence based on the ESTs (5'-EST:EX639292, 3'-EST:EX640424)	K02135	ATPeF1E, ATP5E, ATP15	F-type H+-transporting ATPase subunit epsilon	http://www.genome.jp/dbget-bin/www_bget?ko:K02135	Q9VXN2	191	3.1e-13	Protein stunted OS=Drosophila melanogaster OX=7227 GN=sun PE=1 SV=1	PF04627//PF04159	Mitochondrial ATP synthase epsilon chain//NB glycoprotein	GO:0006119//GO:0015986//GO:0015992	oxidative phosphorylation//ATP synthesis coupled proton transport//proton transport	GO:0046933//GO:0046961	proton-transporting ATP synthase activity, rotational mechanism//proton-transporting ATPase activity, rotational mechanism	GO:0045259//GO:0000275//GO:0016021	proton-transporting ATP synthase complex//mitochondrial proton-transporting ATP synthase complex, catalytic core F(1)//integral component of membrane	KOG3495	Mitochondrial F1F0-ATP synthase, subunit epsilon/ATP15
598	Cluster-3959.2046	1351	1595923	BAH72484.1	857	4.1e-89	ACYPI005567 [Acyrthosiphon pisum]	NM_001246151.2	NM_001246151	802	0	Acyrthosiphon pisum 39S ribosomal protein L40, mitochondrial-like (LOC100164564), mRNA	K17421	MRPL40	large subunit ribosomal protein L40	http://www.genome.jp/dbget-bin/www_bget?ko:K17421	Q9Z2Q5	242	3.2e-19	39S ribosomal protein L40, mitochondrial OS=Mus musculus OX=10090 GN=Mrpl40 PE=1 SV=2	--	--	--	--	--	--	--	--	KOG4778	Mitochondrial ribosomal protein L28
599	Cluster-911.0	324	--	--	--	--	--	--	--	--	--	--	--	--	--	--	--	--	--	--	--	--	--	--	--	--	--	--	--	--
600	Cluster-3959.2044	960	2477751	XP_001944865.2	863	5.9e-90	PREDICTED: uncharacterized protein LOC100167699 [Acyrthosiphon pisum]	XM_001944830.4	XM_001944830	761	0	PREDICTED: Acyrthosiphon pisum uncharacterized LOC100167699 (LOC100167699), mRNA	--	--	--	--	--	--	--	--	PF00159	Pancreatic hormone peptide	GO:0007165	signal transduction	GO:0005179	hormone activity	GO:0005576	extracellular region	--	--
601	Cluster-3959.2045	1454	1167627	XP_001948034.1	1220	3.6e-131	PREDICTED: peroxiredoxin [Acyrthosiphon pisum]	AK340004.1	AK340004	1031	0	Acyrthosiphon pisum ACYPI003947 mRNA, clone: 655G5, complete cds, full-insert cDNA sequence based on the ESTs (5'-EST:FF336067, 3'-EST:FF336989)	K03386	E1.11.1.15, PRDX, ahpC	peroxiredoxin (alkyl hydroperoxide reductase subunit C)	http://www.genome.jp/dbget-bin/www_bget?ko:K03386	Q5REY3	687	8.6e-71	Thioredoxin-dependent peroxide reductase, mitochondrial OS=Pongo abelii OX=9601 GN=PRDX3 PE=2 SV=1	PF00578//PF10417//PF08534	AhpC/TSA family//C-terminal domain of 1-Cys peroxiredoxin//Redoxin	GO:0055114	oxidation-reduction process	GO:0016209//GO:0016491//GO:0051920	antioxidant activity//oxidoreductase activity//peroxiredoxin activity	--	--	KOG0852	Alkyl hydroperoxide reductase, thiol specific antioxidant and related enzymes
602	Cluster-3959.2042	2102	--	--	--	--	--	XR_001680011.1	XR_001680011	268	1.3e-135	PREDICTED: Acyrthosiphon pisum uncharacterized LOC107884552 (LOC107884552), ncRNA	--	--	--	--	--	--	--	--	--	--	--	--	--	--	--	--	--	--
603	Cluster-3959.2043	1194	10808104	XP_022173307.1	1406	8e-153	methyltransferase-like protein 22 [Myzus persicae]	XM_016800539.1	XM_016800539	755	0	PREDICTED: Acyrthosiphon pisum methyltransferase-like protein 22 (LOC100573888), transcript variant X2, mRNA	--	--	--	--	Q8R1C6	289	1e-24	Methyltransferase-like protein 22 OS=Mus musculus OX=10090 GN=Mettl22 PE=2 SV=1	PF08123//PF01135//PF02527	Histone methylation protein DOT1//Protein-L-isoaspartate(D-aspartate) O-methyltransferase (PCMT)//rRNA small subunit methyltransferase G	GO:0006554//GO:0006396//GO:0000154//GO:0006464//GO:0006479//GO:0046500//GO:0006364	lysine catabolic process//RNA processing//rRNA modification//cellular protein modification process//protein methylation//S-adenosylmethionine metabolic process//rRNA processing	GO:0008649//GO:0004719//GO:0018024	rRNA methyltransferase activity//protein-L-isoaspartate (D-aspartate) O-methyltransferase activity//histone-lysine N-methyltransferase activity	GO:0005737	cytoplasm	KOG2793	Putative N2,N2-dimethylguanosine tRNA methyltransferase
604	Cluster-3959.2040	1362	10795019	XP_022181988.1	620	1.3e-61	gamma-aminobutyric acid receptor-associated protein [Myzus persicae]	NM_001162109.2	NM_001162109	964	0	Acyrthosiphon pisum gamma-aminobutyric acid receptor-associated protein-like (LOC100163628), mRNA	K08341	GABARAP, ATG8, LC3	GABA(A) receptor-associated protein	http://www.genome.jp/dbget-bin/www_bget?ko:K08341	Q5RF21	543	4e-54	Gamma-aminobutyric acid receptor-associated protein-like 1 OS=Pongo abelii OX=9601 GN=GABARAPL1 PE=3 SV=1	PF04110	Ubiquitin-like autophagy protein Apg12	GO:0000045	autophagosome assembly	--	--	GO:0005737	cytoplasm	KOG1654	Microtubule-associated anchor protein involved in autophagy and membrane trafficking
605	Cluster-3959.2041	360	--	--	--	--	--	XM_008189319.2	XM_008189319	67	1.12e-24	PREDICTED: Acyrthosiphon pisum PDZ and LIM domain protein Zasp (LOC100162539), transcript variant X3, mRNA	--	--	--	--	--	--	--	--	--	--	--	--	--	--	--	--	--	--
606	Cluster-3959.2109	448	8334002	XP_016656290.1	165	2.4e-09	PREDICTED: uncharacterized protein LOC107882454 [Acyrthosiphon pisum]	XM_016806478.1	XM_016806478	124	2.92e-56	PREDICTED: Acyrthosiphon pisum neurensin-1 (LOC100167350), transcript variant X3, mRNA	--	--	--	--	--	--	--	--	--	--	--	--	--	--	--	--	--	--
607	Cluster-3959.2108	2523	--	--	--	--	--	XM_008183203.2	XM_008183203	460	0	PREDICTED: Acyrthosiphon pisum uncharacterized LOC100166576 (LOC100166576), transcript variant X2, mRNA	--	--	--	--	--	--	--	--	PF06248	Centromere/kinetochore Zw10	GO:0007067	mitotic nuclear division	--	--	GO:0005634//GO:0000775	nucleus//chromosome, centromeric region	--	--
608	Cluster-5981.0	3682	9721955	XP_018899205.1	1983	3e-219	PREDICTED: putative aldehyde dehydrogenase family 7 member A1 homolog [Bemisia tabaci]	XM_001951824.4	XM_001951824	1632	0	PREDICTED: Acyrthosiphon pisum putative aldehyde dehydrogenase family 7 member A1 homolog (LOC100159019), mRNA	K14085	ALDH7A1	aldehyde dehydrogenase family 7 member A1	http://www.genome.jp/dbget-bin/www_bget?ko:K14085	P46562	1795	7.2e-199	Putative aldehyde dehydrogenase family 7 member A1 homolog OS=Caenorhabditis elegans OX=6239 GN=alh-9 PE=3 SV=2	PF00171//PF05425	Aldehyde dehydrogenase family//Copper resistance protein D	GO:0008152//GO:0055114	metabolic process//oxidation-reduction process	GO:0016491	oxidoreductase activity	GO:0016021	integral component of membrane	KOG2574	mRNA splicing factor PRP31
609	Cluster-3326.0	305	--	--	--	--	--	XM_016803881.1	XM_016803881	192	3.03e-94	PREDICTED: Acyrthosiphon pisum uncharacterized LOC100569007 (LOC100569007), transcript variant X1, mRNA	--	--	--	--	--	--	--	--	--	--	--	--	--	--	--	--	--	--
610	Cluster-11885.0	2901	2476454	XP_003244332.1	524	3.6e-50	PREDICTED: protein doublesex [Acyrthosiphon pisum]	XM_003244284.3	XM_003244284	2141	0	PREDICTED: Acyrthosiphon pisum protein doublesex (LOC100575402), mRNA	K08706	NR0AN, kni	nuclear receptor subfamily 0 group A	http://www.genome.jp/dbget-bin/www_bget?ko:K08706	P13054	496	2.4e-48	Knirps-related protein OS=Drosophila melanogaster OX=7227 GN=knrl PE=2 SV=1	PF03699//PF00105//PF07655//PF03153	Uncharacterised protein family (UPF0182)//Zinc finger, C4 type (two domains)//Secretin N-terminal domain//Transcription factor IIA, alpha/beta subunit	GO:0009297//GO:0006367//GO:0006355	pilus assembly//transcription initiation from RNA polymerase II promoter//regulation of transcription, DNA-templated	GO:0008270//GO:0003700//GO:0043565	zinc ion binding//transcription factor activity, sequence-specific DNA binding//sequence-specific DNA binding	GO:0005667//GO:0005634//GO:0016021//GO:0019867//GO:0005672	transcription factor complex//nucleus//integral component of membrane//outer membrane//transcription factor TFIIA complex	KOG4216	Steroid hormone nuclear receptor
611	Cluster-12938.0	2367	4414857	XP_008182852.1	2182	1.6e-242	PREDICTED: ecdysone-induced protein 78C isoform X3 [Acyrthosiphon pisum]	XM_008184630.2	XM_008184630	2082	0	PREDICTED: Acyrthosiphon pisum ecdysone-induced protein 78C (LOC100161053), transcript variant X3, mRNA	K08701	NR1D3	nuclear receptor subfamily 1 group D member 3	http://www.genome.jp/dbget-bin/www_bget?ko:K08701	P45447	723	9.4e-75	Ecdysone-induced protein 78C OS=Drosophila melanogaster OX=7227 GN=Eip78C PE=2 SV=4	PF00104//PF00105	Ligand-binding domain of nuclear hormone receptor//Zinc finger, C4 type (two domains)	GO:0043401//GO:0006355	steroid hormone mediated signaling pathway//regulation of transcription, DNA-templated	GO:0003700//GO:0008270//GO:0043565	transcription factor activity, sequence-specific DNA binding//zinc ion binding//sequence-specific DNA binding	GO:0005634//GO:0005667	nucleus//transcription factor complex	KOG4846	Nuclear receptor
612	Cluster-3959.2103	6424	4415075	XP_008183222.1	5048	0	PREDICTED: sterol regulatory element-binding protein 2 isoform X1 [Acyrthosiphon pisum]	XM_008185001.2	XM_008185001	3090	0	PREDICTED: Acyrthosiphon pisum sterol regulatory element-binding protein 2 (LOC100164413), transcript variant X2, mRNA	K07197	SREBP1, SREBF1	sterol regulatory element-binding transcription factor 1	http://www.genome.jp/dbget-bin/www_bget?ko:K07197	Q6GQ26	988	4.8e-105	Sterol regulatory element-binding protein 2 OS=Xenopus laevis OX=8355 GN=srebf2 PE=2 SV=1	PF03812//PF00010	2-keto-3-deoxygluconate permease//Helix-loop-helix DNA-binding domain	GO:0046411//GO:0008643//GO:0006820//GO:0015725//GO:0006812	2-keto-3-deoxygluconate transport//carbohydrate transport//anion transport//gluconate transport//cation transport	GO:0046983//GO:0015649	protein dimerization activity//2-keto-3-deoxygluconate:proton symporter activity	GO:0016021	integral component of membrane	KOG2588	Predicted DNA-binding protein
613	Cluster-3959.2102	1434	10813632	XP_022179399.1	1090	4.2e-116	ras-related protein Rab-13-like isoform X1 [Myzus persicae]	XM_001944766.4	XM_001944766	1227	0	PREDICTED: Acyrthosiphon pisum ras-related protein Rab-13-like (LOC100160768), transcript variant X1, mRNA	K07901	RAB8A, MEL	Ras-related protein Rab-8A	http://www.genome.jp/dbget-bin/www_bget?ko:K07901	A4FV54	510	2.8e-50	Ras-related protein Rab-8A OS=Bos taurus OX=9913 GN=RAB8A PE=2 SV=1	PF00071//PF00735//PF01637//PF00025//PF08477//PF01926//PF04670//PF02421	Ras family//Septin//Archaeal ATPase//ADP-ribosylation factor family//Ras of Complex, Roc, domain of DAPkinase//50S ribosome-binding GTPase//Gtr1/RagA G protein conserved region//Ferrous iron transport protein B	GO:0015684//GO:0007264	ferrous iron transport//small GTPase mediated signal transduction	GO:0005525//GO:0005524//GO:0015093	GTP binding//ATP binding//ferrous iron transmembrane transporter activity	GO:0016021	integral component of membrane	KOG0078	GTP-binding protein SEC4, small G protein superfamily, and related Ras family GTP-binding proteins
614	Cluster-3959.2101	3707	7688452	XP_015366720.1	1977	1.5e-218	PREDICTED: neural cell adhesion molecule 1-like [Diuraphis noxia]	XM_001947984.3	XM_001947984	1423	0	PREDICTED: Acyrthosiphon pisum neural cell adhesion molecule 1 (LOC100163662), mRNA	--	--	--	--	P34082	223	1.4e-16	Fasciclin-2 OS=Drosophila melanogaster OX=7227 GN=Fas2 PE=1 SV=1	PF00041//PF13895	Fibronectin type III domain//Immunoglobulin domain	--	--	GO:0005515	protein binding	--	--	KOG3510	FOG: Immunoglobulin C-2 Type/fibronectin type III domains
615	Cluster-3959.2100	2312	10804322	XP_022169141.1	3044	0	peroxidase mlt-7-like [Myzus persicae]	XM_008185509.2	XM_008185509	1748	0	PREDICTED: Acyrthosiphon pisum peroxidase-like (LOC100168919), transcript variant X3, mRNA	--	--	--	--	Q23490	722	1.2e-74	Peroxidase mlt-7 OS=Caenorhabditis elegans OX=6239 GN=mlt-7 PE=1 SV=1	PF11857//PF05434	Domain of unknown function (DUF3377)//TMEM9	--	--	GO:0004222	metalloendopeptidase activity	GO:0016021	integral component of membrane	KOG2408	Peroxidase/oxygenase
616	Cluster-3959.2107	4246	2478581	XP_003247491.1	3981	0	PREDICTED: protein PFC0760c isoform X2 [Acyrthosiphon pisum]	XM_003247443.3	XM_003247443	2299	0	PREDICTED: Acyrthosiphon pisum protein PFC0760c (LOC100572899), transcript variant X2, mRNA	--	--	--	--	--	--	--	--	--	--	--	--	--	--	--	--	--	--
617	Cluster-3959.2106	590	7697204	XP_015369622.1	234	3.1e-17	PREDICTED: dual specificity protein kinase CLK2 isoform X4 [Diuraphis noxia]	XM_008185204.2	XM_008185204	310	1.57e-159	PREDICTED: Acyrthosiphon pisum dual specificity protein kinase CLK2 (LOC100167783), transcript variant X5, mRNA	--	--	--	--	--	--	--	--	--	--	--	--	--	--	--	--	--	--
618	Cluster-3959.2105	2589	4415209	XP_008183424.1	2985	0	PREDICTED: dual specificity protein kinase CLK2 isoform X1 [Acyrthosiphon pisum]	XM_008185202.2	XM_008185202	2318	0	PREDICTED: Acyrthosiphon pisum dual specificity protein kinase CLK2 (LOC100167783), transcript variant X1, mRNA	K08823	CLK	CDC-like kinase	http://www.genome.jp/dbget-bin/www_bget?ko:K08823	P49762	1331	3.2e-145	Serine/threonine-protein kinase Doa OS=Drosophila melanogaster OX=7227 GN=Doa PE=1 SV=2	PF06293//PF07714//PF00069	Lipopolysaccharide kinase (Kdo/WaaP) family//Protein tyrosine kinase//Protein kinase domain	GO:0006468	protein phosphorylation	GO:0016773//GO:0005524//GO:0004672	phosphotransferase activity, alcohol group as acceptor//ATP binding//protein kinase activity	GO:0016020	membrane	KOG0671	LAMMER dual specificity kinases
619	Cluster-3959.2104	3944	2476184	XP_003243917.1	2779	0	PREDICTED: putative inorganic phosphate cotransporter isoform X1 [Acyrthosiphon pisum]	XM_003243868.3	XM_003243868	2481	0	PREDICTED: Acyrthosiphon pisum putative inorganic phosphate cotransporter (LOC100163144), transcript variant X1, mRNA	K12301	SLC17A5	MFS transporter, ACS family, solute carrier family 17 (sodium-dependent inorganic phosphate cotransporter), member 5	http://www.genome.jp/dbget-bin/www_bget?ko:K12301	Q9V7S5	1731	2e-191	Putative inorganic phosphate cotransporter OS=Drosophila melanogaster OX=7227 GN=Picot PE=2 SV=1	PF07690//PF03092//PF00083	Major Facilitator Superfamily//BT1 family//Sugar (and other) transporter	GO:0055085//GO:0006810	transmembrane transport//transport	GO:0022857	transmembrane transporter activity	GO:0016021	integral component of membrane	--	--
620	Cluster-11102.0	480	--	--	--	--	--	XM_008186840.2	XM_008186840	403	0	PREDICTED: Acyrthosiphon pisum uncharacterized LOC103309980 (LOC103309980), mRNA	--	--	--	--	--	--	--	--	--	--	--	--	--	--	--	--	--	--
621	Cluster-12766.0	544	8341956	XP_016658568.1	564	1.6e-55	PREDICTED: complement C1s-A subcomponent isoform X2 [Acyrthosiphon pisum]	XM_016800347.1	XM_016800347	240	1.18e-120	PREDICTED: Acyrthosiphon pisum complement C1s subcomponent (LOC100572031), transcript variant X11, mRNA	--	--	--	--	Q58L93	148	1e-08	Venom prothrombin activator porpharin-D OS=Pseudechis porphyriacus OX=8671 PE=2 SV=1	PF00089	Trypsin	GO:0006508	proteolysis	GO:0004252	serine-type endopeptidase activity	--	--	--	--
622	Cluster-3267.0	438	5431711	XP_011566068.1	714	5.1e-73	PREDICTED: uncharacterized protein LOC105395804 [Plutella xylostella]	CP013031.1	CP013031	438	0	Escherichia coli strain H1827/12, complete genome	--	--	--	--	P30128	761	6.8e-80	Transcription elongation factor GreB OS=Escherichia coli (strain K12) OX=83333 GN=greB PE=1 SV=2	PF01272//PF03449	Transcription elongation factor, GreA/GreB, C-term//Transcription elongation factor, N-terminal	GO:0032784	regulation of DNA-templated transcription, elongation	GO:0003677	DNA binding	--	--	--	--
623	Cluster-12766.2	359	8332721	XP_016655924.1	502	1.6e-48	PREDICTED: uncharacterized protein LOC100572703 [Acyrthosiphon pisum]	XM_016800435.1	XM_016800435	257	2.67e-130	PREDICTED: Acyrthosiphon pisum uncharacterized LOC100572703 (LOC100572703), mRNA	--	--	--	--	--	--	--	--	PF00089	Trypsin	GO:0006508	proteolysis	GO:0004252	serine-type endopeptidase activity	--	--	--	--
624	Cluster-5305.0	410	2475085	XP_001947958.2	608	9.3e-61	PREDICTED: uncharacterized protein LOC100163657 [Acyrthosiphon pisum]	XM_001947923.4	XM_001947923	392	0	PREDICTED: Acyrthosiphon pisum uncharacterized LOC100163657 (LOC100163657), mRNA	K17586	PHRF1	PHD and RING finger domain-containing protein 1	http://www.genome.jp/dbget-bin/www_bget?ko:K17586	Q9P1Y6	238	2.8e-19	PHD and RING finger domain-containing protein 1 OS=Homo sapiens OX=9606 GN=PHRF1 PE=1 SV=3	PF00628//PF00301//PF00130	PHD-finger//Rubredoxin//Phorbol esters/diacylglycerol binding domain (C1 domain)	GO:0035556	intracellular signal transduction	GO:0005515//GO:0005506	protein binding//iron ion binding	--	--	KOG1246	DNA-binding protein jumonji/RBP2/SMCY, contains JmjC domain
625	Cluster-4750.0	1497	2476328	XP_001944046.2	2226	8.2e-248	PREDICTED: uncharacterized protein LOC100160712 [Acyrthosiphon pisum]	XM_001944011.4	XM_001944011	1375	0	PREDICTED: Acyrthosiphon pisum spaetzle 6 (LOC100160712), mRNA	--	--	--	--	--	--	--	--	PF10505//PF02035	NMDA receptor-regulated gene protein 2 C-terminus//Coagulin	GO:0042381	hemolymph coagulation	--	--	GO:0005576//GO:0008023	extracellular region//transcription elongation factor complex	--	--
626	Cluster-9526.0	328	10794853	XP_022180294.1	240	3.5e-18	uncharacterized protein LOC111040631 [Myzus persicae]	--	--	--	--	--	--	--	--	--	--	--	--	--	--	--	--	--	--	--	--	--	--	--
627	Cluster-641.0	3422	8334251	XP_016656416.1	3891	0	PREDICTED: breast carcinoma-amplified sequence 3 homolog isoform X2 [Acyrthosiphon pisum]	XM_016800927.1	XM_016800927	2583	0	PREDICTED: Acyrthosiphon pisum breast carcinoma-amplified sequence 3 homolog (LOC100166281), transcript variant X2, mRNA	--	--	--	--	Q8SY41	1168	3.4e-126	Breast carcinoma-amplified sequence 3 homolog OS=Drosophila melanogaster OX=7227 GN=rudhira PE=1 SV=1	--	--	--	--	--	--	--	--	KOG2109	WD40 repeat protein
628	Cluster-6565.0	423	--	--	--	--	--	XM_016802326.1	XM_016802326	77	3.67e-30	PREDICTED: Acyrthosiphon pisum uncharacterized LOC107883025 (LOC107883025), mRNA	--	--	--	--	--	--	--	--	--	--	--	--	--	--	--	--	--	--
629	Cluster-11721.0	1320	4412371	XP_008178720.1	699	8.5e-71	PREDICTED: uncharacterized protein LOC100572385 [Acyrthosiphon pisum]	XM_008180498.2	XM_008180498	754	0	PREDICTED: Acyrthosiphon pisum uncharacterized LOC100572385 (LOC100572385), mRNA	--	--	--	--	--	--	--	--	--	--	--	--	--	--	--	--	--	--
630	Cluster-4333.0	415	8332953	XP_016655998.1	147	2.7e-07	PREDICTED: lisH domain-containing protein ARMC9-like [Acyrthosiphon pisum]	XM_008179927.2	XM_008179927	190	5.49e-93	PREDICTED: Acyrthosiphon pisum lisH domain-containing protein ARMC9-like (LOC100569141), transcript variant X2, mRNA	--	--	--	--	--	--	--	--	--	--	--	--	--	--	--	--	--	--
631	Cluster-1372.0	333	--	--	--	--	--	--	--	--	--	--	--	--	--	--	--	--	--	--	--	--	--	--	--	--	--	--	--	--
632	Cluster-11739.0	540	--	--	--	--	--	--	--	--	--	--	--	--	--	--	--	--	--	--	--	--	--	--	--	--	--	--	--	--
633	Cluster-8942.0	496	--	--	--	--	--	--	--	--	--	--	--	--	--	--	--	--	--	--	PF01825	GPCR proteolysis site, GPS, motif	--	--	--	--	GO:0016020	membrane	--	--
634	Cluster-4770.0	1206	8343920	XP_016659150.1	309	1.3e-25	PREDICTED: uncharacterized protein LOC107883511 [Acyrthosiphon pisum]	NM_001162587.1	AK342094	256	3.45e-129	Acyrthosiphon pisum histidine triad protein 4-like (LOC100159202), mRNA >dbj|AK342094.1| Acyrthosiphon pisum ACYPI000597 mRNA, clone: 241M23, complete cds, full-insert cDNA sequence based on the ESTs (5'-EST:EX637608, 3'-EST:EX638509)	--	--	--	--	--	--	--	--	--	--	--	--	--	--	--	--	--	--
635	Cluster-6442.0	775	--	--	--	--	--	XM_003243084.3	XM_003243084	134	1.44e-61	PREDICTED: Acyrthosiphon pisum innexin inx3-like (LOC100165879), transcript variant X2, mRNA	--	--	--	--	--	--	--	--	--	--	--	--	--	--	--	--	--	--
636	Cluster-7196.0	680	--	--	--	--	--	--	--	--	--	--	--	--	--	--	--	--	--	--	--	--	--	--	--	--	--	--	--	--
637	Cluster-673.0	3155	1168599	XP_001942837.1	3518	0	PREDICTED: pre-rRNA processing protein FTSJ3 [Acyrthosiphon pisum]	XM_001942802.4	XM_001942802	2385	0	PREDICTED: Acyrthosiphon pisum pre-rRNA processing protein FTSJ3 (LOC100165454), mRNA	K14857	SPB1, FTSJ3	AdoMet-dependent rRNA methyltransferase SPB1	http://www.genome.jp/dbget-bin/www_bget?ko:K14857	Q5ZKM1	1111	1.3e-119	pre-rRNA processing protein FTSJ3 OS=Gallus gallus OX=9031 GN=FTSJ3 PE=2 SV=2	PF07780//PF01728//PF03788	Spb1 C-terminal domain//FtsJ-like methyltransferase//LrgA family	GO:0032259//GO:0006364	methylation//rRNA processing	GO:0008168	methyltransferase activity	GO:0005634//GO:0016021	nucleus//integral component of membrane	KOG1098	Putative SAM-dependent rRNA methyltransferase SPB1
638	Cluster-4478.0	355	--	--	--	--	--	--	--	--	--	--	--	--	--	--	--	--	--	--	--	--	--	--	--	--	--	--	--	--
639	Cluster-1316.0	355	--	--	--	--	--	--	--	--	--	--	--	--	--	--	--	--	--	--	--	--	--	--	--	--	--	--	--	--
640	Cluster-12290.0	1109	10803808	XP_022168585.1	1299	1.9e-140	paired mesoderm homeobox protein 2-like [Myzus persicae]	XM_016806364.1	XM_016806364	600	0	PREDICTED: Acyrthosiphon pisum paired mesoderm homeobox protein 2 (LOC100575543), partial mRNA	K09329	PRRX, PMX	paired mesoderm homeobox protein	http://www.genome.jp/dbget-bin/www_bget?ko:K09329	P54821	296	1.4e-25	Paired mesoderm homeobox protein 1 OS=Homo sapiens OX=9606 GN=PRRX1 PE=1 SV=2	PF00046//PF05920	Homeobox domain//Homeobox KN domain	GO:0006355	regulation of transcription, DNA-templated	GO:0003677	DNA binding	--	--	KOG0490	Transcription factor, contains HOX domain
641	Cluster-5179.1	569	--	--	--	--	--	--	--	--	--	--	--	--	--	--	--	--	--	--	--	--	--	--	--	--	--	--	--	--
642	Cluster-5179.0	384	--	--	--	--	--	--	--	--	--	--	--	--	--	--	--	--	--	--	PF00322	Endothelin family	GO:0019229	regulation of vasoconstriction	--	--	GO:0005576	extracellular region	--	--
643	Cluster-5751.0	446	10808912	XP_022174206.1	788	1.4e-81	DNA helicase MCM9-like [Myzus persicae]	XM_016803955.1	XM_016803955	412	0	PREDICTED: Acyrthosiphon pisum DNA helicase MCM9 (LOC100165129), transcript variant X2, mRNA	K10738	MCM9	DNA helicase MCM9	http://www.genome.jp/dbget-bin/www_bget?ko:K10738	F1N2W9	391	5.6e-37	DNA helicase MCM9 OS=Bos taurus OX=9913 GN=MCM9 PE=3 SV=2	PF09162	Tap, RNA-binding	GO:0006406	mRNA export from nucleus	GO:0003723	RNA binding	GO:0005737//GO:0005634	cytoplasm//nucleus	KOG0477	DNA replication licensing factor, MCM2 component
644	Cluster-11274.0	1396	10812085	XP_022177697.1	238	2.6e-17	uncharacterized protein LOC111038778 [Myzus persicae]	FP925129.1	FP925129	298	1.8e-152	Acyrthosiphon pisum mRNA, clone: ACI0AAF59YA11, full-insert cDNA sequence based on ESTs (5'-EST:ACI0AAF59YA11AAM1, 3'-EST ACI2AAF9YF17BBM1)	--	--	--	--	--	--	--	--	--	--	--	--	--	--	--	--	--	--
645	Cluster-8319.0	330	2478984	XP_003248160.1	544	2e-53	PREDICTED: SET and MYND domain-containing protein 4-like [Acyrthosiphon pisum]	XM_003248112.3	XM_003248112	285	6.62e-146	PREDICTED: Acyrthosiphon pisum SET and MYND domain-containing protein 4-like (LOC100569491), mRNA	--	--	--	--	--	--	--	--	PF00856	SET domain	--	--	GO:0005515	protein binding	--	--	--	--
646	Cluster-5592.0	541	--	--	--	--	--	--	--	--	--	--	--	--	--	--	--	--	--	--	--	--	--	--	--	--	--	--	--	--
647	Cluster-6871.0	640	4417505	XP_008187393.1	933	3e-98	PREDICTED: LOW QUALITY PROTEIN: talin-1 [Acyrthosiphon pisum]	XM_008189171.2	XM_008189171	591	0	PREDICTED: Acyrthosiphon pisum talin-1 (LOC100162757), mRNA	K06271	TLN	talin	http://www.genome.jp/dbget-bin/www_bget?ko:K06271	Q9Y4G6	639	1.4e-65	Talin-2 OS=Homo sapiens OX=9606 GN=TLN2 PE=1 SV=4	--	--	--	--	--	--	--	--	KOG4261	Talin
648	Cluster-11873.0	437	--	--	--	--	--	--	--	--	--	--	--	--	--	--	--	--	--	--	--	--	--	--	--	--	--	--	--	--
649	Cluster-10904.0	1233	4418036	XP_008188226.1	1301	1.2e-140	PREDICTED: checkpoint protein HUS1 [Acyrthosiphon pisum]	XM_001950631.4	XM_001950631	905	0	PREDICTED: Acyrthosiphon pisum checkpoint protein HUS1 (LOC100163232), transcript variant X1, mRNA	K10903	HUS1	HUS1 checkpoint protein	http://www.genome.jp/dbget-bin/www_bget?ko:K10903	O60921	398	2.4e-37	Checkpoint protein HUS1 OS=Homo sapiens OX=9606 GN=HUS1 PE=1 SV=1	PF04005	Hus1-like protein	GO:0000077//GO:0006281	DNA damage checkpoint//DNA repair	--	--	GO:0030896	checkpoint clamp complex	KOG3999	Checkpoint 9-1-1 complex, HUS1 component
650	Cluster-6442.7	1272	1168338	XP_001943879.1	509	8.7e-49	PREDICTED: transcription and mRNA export factor ENY2 [Acyrthosiphon pisum]	XM_001943844.4	XM_001943844	402	0	PREDICTED: Acyrthosiphon pisum transcription and mRNA export factor ENY2 (LOC100163044), mRNA	K11368	ENY2, DC6, SUS1	enhancer of yellow 2 transcription factor	http://www.genome.jp/dbget-bin/www_bget?ko:K11368	Q4H3N8	178	7.9e-12	Transcription and mRNA export factor ENY2 OS=Ciona intestinalis OX=7719 GN=ENY2 PE=3 SV=1	--	--	--	--	--	--	--	--	KOG4479	Transcription factor e(y)2
651	Cluster-6519.0	2146	10802584	XP_022167227.1	2444	6.2e-273	tyrosine-protein kinase Btk29A isoform X2 [Myzus persicae]	XM_008188906.2	XM_008188906	1987	0	PREDICTED: Acyrthosiphon pisum tyrosine-protein kinase Btk29A (LOC100168763), transcript variant X3, mRNA	K07364	TEC	tyrosine-protein kinase Tec	http://www.genome.jp/dbget-bin/www_bget?ko:K07364	P08630	2044	5.7e-228	Tyrosine-protein kinase Btk29A OS=Drosophila melanogaster OX=7227 GN=Btk29A PE=2 SV=2	PF00069//PF14604//PF07714//PF00018	Protein kinase domain//Variant SH3 domain//Protein tyrosine kinase//SH3 domain	GO:0006468	protein phosphorylation	GO:0005515//GO:0005524//GO:0004672	protein binding//ATP binding//protein kinase activity	--	--	--	--
652	Cluster-6442.2	339	--	--	--	--	--	AC203060.2	AC203060	110	1.31e-48	Acyrthosiphon pisum BAC VMRC38-30-A10 (Benaroya Research Institute VMRC38 Acrythosiphon pisum (Pea Aphid) BAC library) complete sequence	--	--	--	--	--	--	--	--	--	--	--	--	--	--	--	--	--	--
653	Cluster-11964.0	652	2476903	XP_001952865.2	1124	2.2e-120	PREDICTED: hemocytin [Acyrthosiphon pisum]	XM_001952830.4	XM_001952830	613	0	PREDICTED: Acyrthosiphon pisum hemocytin (LOC100162319), mRNA	--	--	--	--	P98092	577	2.2e-58	Hemocytin OS=Bombyx mori OX=7091 PE=2 SV=1	PF00093//PF05375	von Willebrand factor type C domain//Pacifastin inhibitor (LCMII)	--	--	GO:0030414//GO:0005515	peptidase inhibitor activity//protein binding	--	--	--	--
654	Cluster-8369.0	447	--	--	--	--	--	--	--	--	--	--	--	--	--	--	--	--	--	--	--	--	--	--	--	--	--	--	--	--
655	Cluster-5236.0	381	11941322	PRD23617.1	316	6.3e-27	yegK [Nephila clavipes]	CP013031.1	CP013031	381	0	Escherichia coli strain H1827/12, complete genome	--	--	--	--	P76395	552	1e-55	Uncharacterized protein YegK OS=Escherichia coli (strain K12) OX=83333 GN=yegK PE=4 SV=1	--	--	--	--	--	--	--	--	--	--
656	Cluster-8285.0	838	8332428	XP_016655836.1	774	1.1e-79	PREDICTED: complement C1s subcomponent isoform X10 [Acyrthosiphon pisum]	XM_008186799.2	XM_008186799	342	3.69e-177	PREDICTED: Acyrthosiphon pisum uncharacterized LOC100167148 (LOC100167148), transcript variant X2, mRNA	--	--	--	--	Q86T26	148	1.6e-08	Transmembrane protease serine 11B OS=Homo sapiens OX=9606 GN=TMPRSS11B PE=2 SV=3	PF00089	Trypsin	GO:0006508	proteolysis	GO:0004252	serine-type endopeptidase activity	--	--	--	--
657	Cluster-11056.1	645	1168675	XP_001948549.1	1059	7.4e-113	PREDICTED: beta-galactosidase [Acyrthosiphon pisum]	XM_001948514.3	XM_001948514	490	0	PREDICTED: Acyrthosiphon pisum beta-galactosidase (LOC100166809), mRNA	K12309	GLB1, ELNR1	beta-galactosidase	http://www.genome.jp/dbget-bin/www_bget?ko:K12309	P23780	502	1.1e-49	Beta-galactosidase OS=Mus musculus OX=10090 GN=Glb1 PE=1 SV=1	PF02449	Beta-galactosidase	GO:0006027//GO:0005975//GO:0006687//GO:0006012//GO:0046486	glycosaminoglycan catabolic process//carbohydrate metabolic process//glycosphingolipid metabolic process//galactose metabolic process//glycerolipid metabolic process	GO:0004565	beta-galactosidase activity	GO:0009341	beta-galactosidase complex	KOG0496	Beta-galactosidase
658	Cluster-4960.0	546	10813357	XP_022179095.1	194	1.3e-12	mitochondrial chaperone BCS1-like [Myzus persicae]	XM_008191427.2	XM_008191427	234	2.56e-117	PREDICTED: Acyrthosiphon pisum mitochondrial chaperone BCS1-like (LOC103311722), transcript variant X3, mRNA	--	--	--	--	--	--	--	--	--	--	--	--	--	--	--	--	--	--
659	Cluster-9042.0	1504	1595379	BAH71940.1	1377	2.3e-149	ACYPI004065 [Acyrthosiphon pisum]	NM_001162087.2	NM_001162087	930	0	Acyrthosiphon pisum 39S ribosomal protein L19, mitochondrial (Mrpl19), mRNA	K02884	RP-L19, MRPL19, rplS	large subunit ribosomal protein L19	http://www.genome.jp/dbget-bin/www_bget?ko:K02884	Q9VHN6	747	9.8e-78	39S ribosomal protein L19, mitochondrial OS=Drosophila melanogaster OX=7227 GN=mRpL19 PE=2 SV=1	PF01245	Ribosomal protein L19	GO:0006412//GO:0042254	translation//ribosome biogenesis	GO:0003735	structural constituent of ribosome	GO:0005840//GO:0005622	ribosome//intracellular	KOG1698	Mitochondrial/chloroplast ribosomal protein L19
660	Cluster-6418.0	958	--	--	--	--	--	XM_008187626.2	XM_008187626	318	9.31e-164	PREDICTED: Acyrthosiphon pisum copine-5 (LOC100165286), transcript variant X1, mRNA	--	--	--	--	--	--	--	--	--	--	--	--	--	--	--	--	--	--
661	Cluster-5665.0	2585	4414219	XP_008181819.1	2894	0	PREDICTED: 4-coumarate--CoA ligase 3 [Acyrthosiphon pisum]	XM_008183597.2	XM_008183597	2294	0	PREDICTED: Acyrthosiphon pisum 4-coumarate--CoA ligase 3 (LOC100167475), mRNA	--	--	--	--	Q9S777	817	1.3e-85	4-coumarate--CoA ligase 3 OS=Arabidopsis thaliana OX=3702 GN=4CL3 PE=1 SV=1	PF04732//PF00501	Intermediate filament head (DNA binding) region//AMP-binding enzyme	GO:0008152	metabolic process	GO:0003824	catalytic activity	GO:0005882	intermediate filament	KOG1176	Acyl-CoA synthetase
662	Cluster-128.0	1542	--	--	--	--	--	XM_003247950.3	XM_003247950	1425	0	PREDICTED: Acyrthosiphon pisum insulin-like growth factor 2 mRNA-binding protein 1 (LOC100163176), transcript variant X3, mRNA	--	--	--	--	--	--	--	--	--	--	--	--	--	--	--	--	--	--
663	Cluster-7813.0	4985	4411241	XP_008183112.1	5914	0	PREDICTED: AT-rich interactive domain-containing protein 2 isoform X1 [Acyrthosiphon pisum]	XM_008184890.2	XM_008184890	4434	0	PREDICTED: Acyrthosiphon pisum AT-rich interactive domain-containing protein 2 (LOC100161479), transcript variant X1, mRNA	K11765	ARID2	AT-rich interactive domain-containing protein 2	http://www.genome.jp/dbget-bin/www_bget?ko:K11765	E9Q7E2	435	4.9e-41	AT-rich interactive domain-containing protein 2 OS=Mus musculus OX=10090 GN=Arid2 PE=1 SV=1	PF04162	Gyrovirus capsid protein (VP1)	--	--	--	--	GO:0019028	viral capsid	KOG2312	Predicted transcriptional regulator, contains ARID domain
664	Cluster-2288.0	504	--	--	--	--	--	--	--	--	--	--	--	--	--	--	--	--	--	--	--	--	--	--	--	--	--	--	--	--
665	Cluster-4793.0	375	--	--	--	--	--	--	--	--	--	--	--	--	--	--	--	--	--	--	--	--	--	--	--	--	--	--	--	--
666	Cluster-11126.0	2181	2477051	XP_001945549.2	3185	0	PREDICTED: centrosomal protein of 135 kDa [Acyrthosiphon pisum]	XM_001945514.4	XM_001945514	1860	0	PREDICTED: Acyrthosiphon pisum centrosomal protein of 135 kDa (LOC100163804), mRNA	--	--	--	--	Q66GS9	492	5.3e-48	Centrosomal protein of 135 kDa OS=Homo sapiens OX=9606 GN=CEP135 PE=1 SV=2	PF10473//PF00769//PF17078	Leucine-rich repeats of kinetochore protein Cenp-F/LEK1//Ezrin/radixin/moesin family//SWI5-dependent HO expression protein 3	GO:0051028//GO:0048309	mRNA transport//endoplasmic reticulum inheritance	GO:0042803//GO:0008134//GO:0045502//GO:0008092	protein homodimerization activity//transcription factor binding//dynein binding//cytoskeletal protein binding	GO:0005667//GO:0019898//GO:0030286//GO:0005737	transcription factor complex//extrinsic component of membrane//dynein complex//cytoplasm	--	--
667	Cluster-404.0	385	2474315	XP_003240562.1	547	1e-53	PREDICTED: uncharacterized protein LOC100575185 [Acyrthosiphon pisum]	XM_003240514.3	XM_003240514	319	9.87e-165	PREDICTED: Acyrthosiphon pisum uncharacterized LOC100575185 (LOC100575185), mRNA	--	--	--	--	--	--	--	--	--	--	--	--	--	--	--	--	--	--
668	Cluster-6865.0	372	8348162	XP_016660393.1	612	2.9e-61	PREDICTED: WD repeat-containing protein 76-like [Acyrthosiphon pisum]	XM_016804904.1	XM_016804904	330	7.3e-171	PREDICTED: Acyrthosiphon pisum WD repeat-containing protein 76-like (LOC100571583), mRNA	--	--	--	--	A6PWY4	164	9.7e-11	WD repeat-containing protein 76 OS=Mus musculus OX=10090 GN=Wdr76 PE=1 SV=1	--	--	--	--	--	--	--	--	--	--
669	Cluster-3057.0	1086	10813223	XP_022178950.1	850	2.1e-88	histone deacetylase complex subunit SAP30 homolog [Myzus persicae]	NM_001162839.1	AK340849	830	0	Acyrthosiphon pisum histone deacetylase complex subunit SAP30 homolog (Sap30), mRNA >dbj|AK340849.1| Acyrthosiphon pisum ACYPI009823 mRNA, clone: 385A23, complete cds, full-insert cDNA sequence based on the ESTs (5'-EST:FF295190, 3'-EST:FF296863)	K19202	SAP30	histone deacetylase complex subunit SAP30	http://www.genome.jp/dbget-bin/www_bget?ko:K19202	Q17Q39	543	3.2e-54	Histone deacetylase complex subunit SAP30 homolog OS=Aedes aegypti OX=7159 GN=AAEL000149 PE=3 SV=1	PF13867	Sin3 binding region of histone deacetylase complex subunit SAP30	--	--	GO:0005515	protein binding	--	--	--	--
670	Cluster-2148.0	350	4579906	CDW59735.1	516	3.7e-50	Lactamase B and Rubredoxin and Flavodoxin 1 domai n containing protein [Trichuris trichiura]	CP017979.1	CP017979	350	0	Escherichia coli str. K-12 substr. W3110 substrain ZK126 genome	--	--	--	--	P59405	516	1.4e-51	Anaerobic nitric oxide reductase flavorubredoxin OS=Shigella flexneri OX=623 GN=norV PE=3 SV=1	PF15666	Germinal center-associated lymphoma	GO:0050855//GO:2000401	regulation of B cell receptor signaling pathway//regulation of lymphocyte migration	--	--	--	--	--	--
671	Cluster-6069.0	434	2772500	GAA58038.1	201	1.5e-13	periplasmic nitrate reductase, partial [Clonorchis sinensis]	CP017979.1	CP017979	434	0	Escherichia coli str. K-12 substr. W3110 substrain ZK126 genome	--	--	--	--	P0A9I5	374	5.1e-35	Chaperone NapD OS=Escherichia coli (strain K12) OX=83333 GN=napD PE=1 SV=1	PF04879	Molybdopterin oxidoreductase Fe4S4 domain	GO:0055114	oxidation-reduction process	GO:0016491	oxidoreductase activity	--	--	--	--
672	Cluster-6739.0	372	9546170	XP_018401243.1	163	3.4e-09	PREDICTED: probable siderophore-binding lipoprotein YfiY [Cyphomyrmex costatus]	LT632320.1	LT632320	372	0	Escherichia coli strain NCTC 13441 genome assembly, chromosome: 1	--	--	--	--	P15028	603	1.2e-61	Fe(3+) dicitrate-binding periplasmic protein OS=Escherichia coli (strain K12) OX=83333 GN=fecB PE=2 SV=3	PF01497	Periplasmic binding protein	--	--	GO:0005488	binding	--	--	--	--
673	Cluster-12617.0	901	10799699	XP_022164027.1	304	3.7e-25	thioredoxin reductase 1, mitochondrial-like isoform X1 [Myzus persicae]	XM_008181222.2	XM_008181222	168	2.12e-80	PREDICTED: Acyrthosiphon pisum thioredoxin reductase 1, mitochondrial (LOC100163001), transcript variant X1, mRNA	K00384	trxB	thioredoxin reductase (NADPH)	http://www.genome.jp/dbget-bin/www_bget?ko:K00384	Q9VNT5	231	4e-18	Thioredoxin reductase 2, mitochondrial OS=Drosophila melanogaster OX=7227 GN=Trxr-2 PE=2 SV=1	--	--	--	--	--	--	--	--	KOG4716	Thioredoxin reductase
674	Cluster-1705.0	986	--	--	--	--	--	--	--	--	--	--	--	--	--	--	--	--	--	--	--	--	--	--	--	--	--	--	--	--
675	Cluster-11153.0	1245	10800143	XP_022164525.1	1432	8e-156	thymidylate synthase [Myzus persicae]	NM_001162194.2	NM_001162194	1073	0	Acyrthosiphon pisum thymidylate synthase-like (LOC100165507), mRNA	K00560	thyA, TYMS	thymidylate synthase	http://www.genome.jp/dbget-bin/www_bget?ko:K00560	P04818	1073	1.3e-115	Thymidylate synthase OS=Homo sapiens OX=9606 GN=TYMS PE=1 SV=3	PF00303	Thymidylate synthase	GO:0006206//GO:0006231	pyrimidine nucleobase metabolic process//dTMP biosynthetic process	GO:0004799	thymidylate synthase activity	--	--	KOG0673	Thymidylate synthase
676	Cluster-2892.0	424	--	--	--	--	--	XM_001947498.4	XM_001947498	125	7.64e-57	PREDICTED: Acyrthosiphon pisum scavenger receptor class B member 1 (LOC100169440), mRNA	--	--	--	--	--	--	--	--	--	--	--	--	--	--	--	--	--	--
677	Cluster-12901.1	980	1594892	BAH71453.1	827	9e-86	ACYPI008609 [Acyrthosiphon pisum]	NM_001293480.1	NM_001293480	704	0	Acyrthosiphon pisum geminin-like (LOC100167853), mRNA	K10749	GMNN	geminin	http://www.genome.jp/dbget-bin/www_bget?ko:K10749	O88513	137	3.5e-07	Geminin OS=Mus musculus OX=10090 GN=Gmnn PE=1 SV=1	PF07412//PF05130//PF13326	Geminin//FlgN protein//Photosystem II Pbs27	GO:0044780//GO:0006275//GO:0010207	bacterial-type flagellum assembly//regulation of DNA replication//photosystem II assembly	--	--	--	--	--	--
678	Cluster-12457.0	505	11937203	PRD19501.1	235	2e-17	cpxA [Nephila clavipes]	CP014268.2	CP014268	505	0	Escherichia coli B strain C2566, complete genome	--	--	--	--	P0AE83	625	4.6e-64	Sensor protein CpxA OS=Escherichia coli O6:H1 (strain CFT073 / ATCC 700928 / UPEC) OX=199310 GN=cpxA PE=3 SV=1	--	--	--	--	--	--	--	--	KOG0519	Sensory transduction histidine kinase
679	Cluster-9730.0	475	10802296	XP_022166906.1	834	6.7e-87	dedicator of cytokinesis protein 9 [Myzus persicae]	XM_016806501.1	XM_016806501	436	0	PREDICTED: Acyrthosiphon pisum dedicator of cytokinesis protein 9 (LOC100163414), transcript variant X2, mRNA	--	--	--	--	Q5JSL3	274	2.2e-23	Dedicator of cytokinesis protein 11 OS=Homo sapiens OX=9606 GN=DOCK11 PE=1 SV=2	--	--	--	--	--	--	--	--	KOG1997	PH domain-containing protein
680	Cluster-1299.0	466	--	--	--	--	--	XM_016804178.1	XM_016804178	385	0	PREDICTED: Acyrthosiphon pisum eukaryotic translation initiation factor 4E transporter (LOC100165864), transcript variant X2, mRNA	--	--	--	--	--	--	--	--	--	--	--	--	--	--	--	--	--	--
681	Cluster-6442.5	511	--	--	--	--	--	--	--	--	--	--	--	--	--	--	--	--	--	--	--	--	--	--	--	--	--	--	--	--
682	Cluster-812.0	1089	10661547	OXU16379.1	139	6e-06	hypothetical protein TSAR_008961 [Trichomalopsis sarcophagae]	--	--	--	--	--	--	--	--	--	--	--	--	--	--	--	--	--	--	--	--	--	--	--
683	Cluster-10534.0	623	--	--	--	--	--	CP013031.1	CP013031	623	0	Escherichia coli strain H1827/12, complete genome	--	--	--	--	P0ADJ3	320	1.3e-28	Protein YhjR OS=Escherichia coli (strain K12) OX=83333 GN=yhjR PE=2 SV=1	--	--	--	--	--	--	--	--	--	--
684	Cluster-3732.0	1644	10807374	XP_022172515.1	1581	5.6e-173	BSD domain-containing protein 1-like isoform X1 [Myzus persicae]	XM_001947978.3	XM_001947978	1401	0	PREDICTED: Acyrthosiphon pisum BSD domain-containing protein 1-like (LOC100169276), transcript variant X1, mRNA	--	--	--	--	Q5BJ78	289	1.4e-24	BSD domain-containing protein 1 OS=Xenopus tropicalis OX=8364 GN=bsdc1 PE=2 SV=1	--	--	--	--	--	--	--	--	--	--
685	Cluster-7867.0	1408	4413884	XP_008181268.1	1345	1.1e-145	PREDICTED: uncharacterized protein LOC100166431 isoform X1 [Acyrthosiphon pisum]	XM_008183046.2	XM_008183046	1276	0	PREDICTED: Acyrthosiphon pisum DCN1-like protein 1-like (LOC100166431), transcript variant X1, mRNA	K17822	DCUN1D1_2	DCN1-like protein 1/2	http://www.genome.jp/dbget-bin/www_bget?ko:K17822	Q9QZ73	835	5.8e-88	DCN1-like protein 1 OS=Mus musculus OX=10090 GN=Dcun1d1 PE=2 SV=1	PF03943	TAP C-terminal domain	GO:0051028	mRNA transport	--	--	GO:0005634	nucleus	KOG3077	Uncharacterized conserved protein
686	Cluster-11530.0	391	--	--	--	--	--	--	--	--	--	--	--	--	--	--	--	--	--	--	--	--	--	--	--	--	--	--	--	--
687	Cluster-8679.0	1231	4411721	XP_008189826.1	2004	3.7e-222	PREDICTED: trafficking protein particle complex subunit 11 [Acyrthosiphon pisum]	XM_008191604.1	XM_008191604	1118	0	PREDICTED: Acyrthosiphon pisum trafficking protein particle complex subunit 11 (LOC100168317), mRNA	--	--	--	--	Q7Z392	938	5.7e-100	Trafficking protein particle complex subunit 11 OS=Homo sapiens OX=9606 GN=TRAPPC11 PE=1 SV=2	PF01273	LBP / BPI / CETP family, N-terminal domain	--	--	GO:0008289	lipid binding	--	--	KOG4386	Uncharacterized conserved protein
688	Cluster-11847.0	636	--	--	--	--	--	XM_001942990.4	XM_001942990	97	4.33e-41	PREDICTED: Acyrthosiphon pisum 4-hydroxybutyrate coenzyme A transferase (LOC100160488), mRNA	--	--	--	--	--	--	--	--	--	--	--	--	--	--	--	--	--	--
689	Cluster-6375.0	366	--	--	--	--	--	--	--	--	--	--	--	--	--	--	--	--	--	--	--	--	--	--	--	--	--	--	--	--
690	Cluster-5282.0	438	--	--	--	--	--	--	--	--	--	--	--	--	--	--	--	--	--	--	--	--	--	--	--	--	--	--	--	--
691	Cluster-2252.0	871	4414588	XP_008182399.1	1046	3.2e-111	PREDICTED: uncharacterized protein LOC100165991 isoform X1 [Acyrthosiphon pisum]	XM_008184177.2	XM_008184177	812	0	PREDICTED: Acyrthosiphon pisum chronic lymphocytic leukemia deletion region gene 6 protein-like (LOC100165991), transcript variant X1, mRNA	--	--	--	--	Q5W111	471	5.8e-46	SPRY domain-containing protein 7 OS=Homo sapiens OX=9606 GN=SPRYD7 PE=1 SV=2	PF00622	SPRY domain	--	--	GO:0005515	protein binding	--	--	KOG4030	Uncharacterized conserved protein, contains SPRY domain
692	Cluster-3959.1818	4151	2474392	XP_001950723.2	3014	0	PREDICTED: myosin-J heavy chain [Acyrthosiphon pisum]	XM_001950688.4	XM_001950688	2153	0	PREDICTED: Acyrthosiphon pisum myosin-J heavy chain (LOC100159324), mRNA	--	--	--	--	P45961	239	2.2e-18	Calexcitin-2 OS=Caenorhabditis elegans OX=6239 GN=cex-2 PE=2 SV=3	PF13833//PF01213//PF03770//PF12763//PF13405//PF04513//PF00036//PF10591//PF13202//PF13499	EF-hand domain pair//Adenylate cyclase associated (CAP) N terminal//Inositol polyphosphate kinase//Cytoskeletal-regulatory complex EF hand//EF-hand domain//Baculovirus polyhedron envelope protein, PEP, C terminus//EF hand//Secreted protein acidic and rich in cysteine Ca binding region//EF hand//EF-hand domain pair	GO:0007010//GO:0007165	cytoskeleton organization//signal transduction	GO:0008440//GO:0005515//GO:0005509//GO:0005198//GO:0003779	inositol-1,4,5-trisphosphate 3-kinase activity//protein binding//calcium ion binding//structural molecule activity//actin binding	GO:0019028//GO:0005578//GO:0019031	viral capsid//proteinaceous extracellular matrix//viral envelope	--	--
693	Cluster-3836.0	331	--	--	--	--	--	--	--	--	--	--	--	--	--	--	--	--	--	--	--	--	--	--	--	--	--	--	--	--
694	Cluster-11093.0	3878	10813832	XP_022179622.1	5617	0	protein draper-like [Myzus persicae]	XM_001942517.4	XM_001942517	3380	0	PREDICTED: Acyrthosiphon pisum multiple epidermal growth factor-like domains protein 10 (LOC100160385), transcript variant X1, mRNA	--	--	--	--	Q9W0A0	2586	1.4e-290	Protein draper OS=Drosophila melanogaster OX=7227 GN=drpr PE=1 SV=3	PF01414//PF04589//PF00008	Delta serrate ligand//RFX1 transcription activation region//EGF-like domain	GO:0007154//GO:0006355	cell communication//regulation of transcription, DNA-templated	GO:0003677//GO:0005515	DNA binding//protein binding	GO:0016020//GO:0005634	membrane//nucleus	KOG1218	Proteins containing Ca2+-binding EGF-like domains
695	Cluster-3959.1810	2389	2474463	XP_001949073.2	1709	1.2e-187	PREDICTED: uncharacterized protein LOC100159200 [Acyrthosiphon pisum]	XM_001949038.3	XM_001949038	1354	0	PREDICTED: Acyrthosiphon pisum uncharacterized LOC100159200 (LOC100159200), mRNA	K09637	TMPRSS6	transmembrane protease, serine 6	http://www.genome.jp/dbget-bin/www_bget?ko:K09637	Q8VHK8	373	3.6e-34	Transmembrane protease serine 11D OS=Mus musculus OX=10090 GN=Tmprss11d PE=1 SV=2	PF00089	Trypsin	GO:0006508	proteolysis	GO:0004252	serine-type endopeptidase activity	--	--	--	--
696	Cluster-3959.1811	3212	8350573	XP_016662827.1	2816	0	PREDICTED: organic cation transporter protein isoform X2 [Acyrthosiphon pisum]	XM_001944683.4	XM_001944683	2251	0	PREDICTED: Acyrthosiphon pisum organic cation transporter protein (LOC100161697), transcript variant X1, mRNA	K08209	SLC22A13	MFS transporter, OCT family, solute carrier family 22 (organic cation transporter), member 13	http://www.genome.jp/dbget-bin/www_bget?ko:K08209	Q9VCA2	892	3.2e-94	Organic cation transporter protein OS=Drosophila melanogaster OX=7227 GN=Orct PE=1 SV=1	PF07690//PF00083	Major Facilitator Superfamily//Sugar (and other) transporter	GO:0055085	transmembrane transport	GO:0022857	transmembrane transporter activity	GO:0016021	integral component of membrane	KOG0255	Synaptic vesicle transporter SVOP and related transporters (major facilitator superfamily)
697	Cluster-2911.0	414	8350063	XP_016662314.1	138	3e-06	PREDICTED: uncharacterized protein LOC100169050 isoform X4 [Acyrthosiphon pisum]	XM_016806825.1	XM_016806825	381	0	PREDICTED: Acyrthosiphon pisum uncharacterized LOC100169050 (LOC100169050), transcript variant X4, mRNA	--	--	--	--	--	--	--	--	--	--	--	--	--	--	--	--	--	--
698	Cluster-3959.1813	565	482695	ABD76379.1	581	1.7e-57	macrophage migration inhibitory factor-like protein [Acyrthosiphon pisum]	AK342884.1	AK342884	456	0	Acyrthosiphon pisum ACYPI000036 mRNA, clone: 661C9, complete cds, full-insert cDNA sequence based on the ESTs (5'-EST:FF322664, 3'-EST:FF323862)	K07253	MIF	phenylpyruvate tautomerase	http://www.genome.jp/dbget-bin/www_bget?ko:K07253	A9JSE7	218	8.1e-17	Macrophage migration inhibitory factor OS=Xenopus tropicalis OX=8364 GN=mif PE=3 SV=1	--	--	--	--	--	--	--	--	KOG1759	Macrophage migration inhibitory factor
699	Cluster-3959.1814	2731	2474017	XP_003240034.1	3122	0	PREDICTED: uncharacterized protein LOC100571000 [Acyrthosiphon pisum]	XM_003239986.3	XM_003239986	2394	0	PREDICTED: Acyrthosiphon pisum uncharacterized LOC100571000 (LOC100571000), mRNA	--	--	--	--	--	--	--	--	--	--	--	--	--	--	--	--	--	--
700	Cluster-3959.1815	828	10814091	XP_022179909.1	947	9.2e-100	60S ribosomal protein L9 isoform X1 [Myzus persicae]	XM_008187416.2	XM_008187416	637	0	PREDICTED: Acyrthosiphon pisum 60S ribosomal protein L9-like (LOC100162964), transcript variant X2, mRNA	K02940	RP-L9e, RPL9	large subunit ribosomal protein L9e	http://www.genome.jp/dbget-bin/www_bget?ko:K02940	Q963B7	759	2.2e-79	60S ribosomal protein L9 OS=Spodoptera frugiperda OX=7108 GN=RpL9 PE=2 SV=1	PF00347	Ribosomal protein L6	GO:0042254//GO:0006412	ribosome biogenesis//translation	GO:0019843//GO:0003735	rRNA binding//structural constituent of ribosome	GO:0005840	ribosome	KOG3255	60S ribosomal protein L9
701	Cluster-3959.1816	6044	2478840	XP_001947747.2	6723	0	PREDICTED: collagen alpha-1..IV.. chain [Acyrthosiphon pisum]	XM_001947712.4	XM_001947712	5232	0	PREDICTED: Acyrthosiphon pisum collagen alpha-1(IV) chain (LOC100161577), mRNA	K06237	COL4A	collagen, type IV, alpha	http://www.genome.jp/dbget-bin/www_bget?ko:K06237	P17140	2437	4.3e-273	Collagen alpha-2(IV) chain OS=Caenorhabditis elegans OX=6239 GN=let-2 PE=1 SV=2	PF02948//PF01413//PF05790	Amelogenin//C-terminal tandem repeated domain in type 4 procollagen//Immunoglobulin C2-set domain	GO:0007155//GO:0007275	cell adhesion//multicellular organismal development	GO:0005201	extracellular matrix structural constituent	GO:0016021//GO:0005581//GO:0005578	integral component of membrane//collagen trimer//proteinaceous extracellular matrix	KOG3544	Collagens (type IV and type XIII), and related proteins
702	Cluster-3481.0	318	--	--	--	--	--	--	--	--	--	--	--	--	--	--	--	--	--	--	--	--	--	--	--	--	--	--	--	--
703	Cluster-8670.0	451	--	--	--	--	--	--	--	--	--	--	--	--	--	--	--	--	--	--	--	--	--	--	--	--	--	--	--	--
704	Cluster-12377.0	1554	--	--	--	--	--	XR_001679748.1	XR_001679748	35	3.19e-06	PREDICTED: Acyrthosiphon pisum uncharacterized LOC100570218 (LOC100570218), transcript variant X2, misc_RNA	--	--	--	--	--	--	--	--	--	--	--	--	--	--	--	--	--	--
705	Cluster-7732.0	546	4579490	CDW60147.1	846	3.1e-88	DUF3672 and DUF1983 and Phage-tail 3 domain conta ining protein [Trichuris trichiura]	CP015834.1	CP015834	546	0	Escherichia coli strain MS6198, complete genome	--	--	--	--	P03749	573	5.3e-58	Tip attachment protein J OS=Escherichia phage lambda OX=10710 GN=J PE=1 SV=1	--	--	--	--	--	--	--	--	--	--
706	Cluster-237.0	528	5394865	XP_011503960.1	227	1.8e-16	PREDICTED: uncharacterized protein LOC105367036 [Ceratosolen solmsi marchali]	CP017979.1	CP017979	528	0	Escherichia coli str. K-12 substr. W3110 substrain ZK126 genome	--	--	--	--	P09163	386	2.5e-36	Uncharacterized N-acetyltransferase YjaB OS=Escherichia coli (strain K12) OX=83333 GN=yjaB PE=1 SV=1	PF13673//PF06978//PF04204	Acetyltransferase (GNAT) domain//Ribonucleases P/MRP protein subunit POP1//Homoserine O-succinyltransferase	GO:0019281//GO:0006555//GO:0001682//GO:0042967//GO:0008033//GO:0051252	L-methionine biosynthetic process from homoserine via O-succinyl-L-homoserine and cystathionine//methionine metabolic process//tRNA 5'-leader removal//acyl-carrier-protein biosynthetic process//tRNA processing//regulation of RNA metabolic process	GO:0004526//GO:0008080//GO:0008899	ribonuclease P activity//N-acetyltransferase activity//homoserine O-succinyltransferase activity	GO:0005737//GO:0030677	cytoplasm//ribonuclease P complex	--	--
707	Cluster-6008.0	3760	2476466	XP_003244341.1	2355	2.3e-262	PREDICTED: protein tramtrack, alpha isoform [Acyrthosiphon pisum]	XM_003244293.3	XM_003244293	3009	0	PREDICTED: Acyrthosiphon pisum protein tramtrack, alpha isoform (LOC100161247), transcript variant X2, mRNA	K09237	TTK	tramtrack	http://www.genome.jp/dbget-bin/www_bget?ko:K09237	P17789	573	3.7e-57	Protein tramtrack, beta isoform OS=Drosophila melanogaster OX=7227 GN=ttk PE=1 SV=2	PF00096//PF00651//PF13465//PF02166//PF02178//PF13912	Zinc finger, C2H2 type//BTB/POZ domain//Zinc-finger double domain//Androgen receptor//AT hook motif//C2H2-type zinc finger	GO:0006355//GO:0030521//GO:0007165	regulation of transcription, DNA-templated//androgen receptor signaling pathway//signal transduction	GO:0046872//GO:0003677//GO:0005515//GO:0004882//GO:0005496	metal ion binding//DNA binding//protein binding//androgen receptor activity//steroid binding	GO:0005634	nucleus	--	--
708	Cluster-6422.0	321	--	--	--	--	--	--	--	--	--	--	--	--	--	--	--	--	--	--	--	--	--	--	--	--	--	--	--	--
709	Cluster-11202.0	837	--	--	--	--	--	XR_119016.3	XR_119016	470	0	PREDICTED: Acyrthosiphon pisum uncharacterized LOC100568755 (LOC100568755), ncRNA	--	--	--	--	--	--	--	--	--	--	--	--	--	--	--	--	--	--
710	Cluster-7290.0	2082	1168594	XP_001952087.1	1587	1.4e-173	PREDICTED: tRNA-dihydrouridine..20.. synthase [NAD..P..+]-like isoform X1 [Acyrthosiphon pisum]	XM_001952052.4	XM_001952052	1023	0	PREDICTED: Acyrthosiphon pisum tRNA-dihydrouridine(20) synthase [NAD(P)+]-like (LOC100160203), transcript variant X1, mRNA	K05543	DUS2	tRNA-dihydrouridine synthase 2	http://www.genome.jp/dbget-bin/www_bget?ko:K05543	Q9NX74	841	1.7e-88	tRNA-dihydrouridine(20) synthase [NAD(P)+]-like OS=Homo sapiens OX=9606 GN=DUS2 PE=1 SV=1	PF01207//PF00977	Dihydrouridine synthase (Dus)//Histidine biosynthesis protein	GO:0008033//GO:0000105//GO:0055114	tRNA processing//histidine biosynthetic process//oxidation-reduction process	GO:0017150//GO:0050660	tRNA dihydrouridine synthase activity//flavin adenine dinucleotide binding	--	--	KOG2334	tRNA-dihydrouridine synthase
711	Cluster-11927.0	493	--	--	--	--	--	--	--	--	--	--	--	--	--	--	--	--	--	--	--	--	--	--	--	--	--	--	--	--
712	Cluster-11972.0	508	11956838	PRD39133.1	658	1.8e-66	prfA [Nephila clavipes]	CP013031.1	CP013031	508	0	Escherichia coli strain H1827/12, complete genome	K02835	prfA, MTRF1, MRF1	peptide chain release factor 1	http://www.genome.jp/dbget-bin/www_bget?ko:K02835	P0A7I2	804	8.2e-85	Peptide chain release factor 1 OS=Escherichia coli O157:H7 OX=83334 GN=prfA PE=3 SV=1	PF00472//PF03462	RF-1 domain//PCRF domain	GO:0006449//GO:0006415	regulation of translational termination//translational termination	GO:0003747//GO:0016149	translation release factor activity//translation release factor activity, codon specific	GO:0018444//GO:0005840//GO:0005737	translation release factor complex//ribosome//cytoplasm	KOG2726	Mitochondrial polypeptide chain release factor
713	Cluster-136.0	1530	1167758	XP_001949488.1	1832	4.1e-202	PREDICTED: protein LTV1 homolog [Acyrthosiphon pisum]	XM_001949453.4	XM_001949453	1340	0	PREDICTED: Acyrthosiphon pisum protein LTV1 homolog (LOC100167560), mRNA	K14798	LTV1	protein LTV1	http://www.genome.jp/dbget-bin/www_bget?ko:K14798	Q7KN79	716	3.9e-74	Protein LTV1 homolog OS=Drosophila melanogaster OX=7227 GN=CG7686 PE=1 SV=1	--	--	--	--	--	--	--	--	KOG2637	Uncharacterized conserved protein
714	Cluster-1406.0	1487	10799428	XP_022163728.1	950	7.5e-100	dnaJ homolog subfamily C member 5 isoform X1 [Myzus persicae]	NM_001160337.1	NM_001160337	1296	0	Acyrthosiphon pisum cysteine string protein (Csp), transcript variant 1, mRNA	K09525	DNAJC5	DnaJ homolog subfamily C member 5	http://www.genome.jp/dbget-bin/www_bget?ko:K09525	P56101	450	2.7e-43	DnaJ homolog subfamily C member 5 OS=Tetronarce californica OX=7787 GN=dnajc5 PE=1 SV=1	--	--	--	--	--	--	--	--	KOG0716	Molecular chaperone (DnaJ superfamily)
715	Cluster-5503.0	1490	1168146	XP_001946406.1	2244	6.7e-250	PREDICTED: probable proline--tRNA ligase, mitochondrial [Acyrthosiphon pisum]	XM_001946371.4	XM_001946371	1325	0	PREDICTED: Acyrthosiphon pisum probable proline--tRNA ligase, mitochondrial (LOC100166148), mRNA	K01881	PARS, proS	prolyl-tRNA synthetase	http://www.genome.jp/dbget-bin/www_bget?ko:K01881	Q7L3T8	908	2.1e-96	Probable proline--tRNA ligase, mitochondrial OS=Homo sapiens OX=9606 GN=PARS2 PE=1 SV=1	PF03811//PF01155//PF02701//PF00587	InsA N-terminal domain//Hydrogenase/urease nickel incorporation, metallochaperone, hypA//Dof domain, zinc finger//tRNA synthetase class II core domain (G, H, P, S and T)	GO:0006418//GO:0006464//GO:0006313//GO:0006355	tRNA aminoacylation for protein translation//cellular protein modification process//transposition, DNA-mediated//regulation of transcription, DNA-templated	GO:0000166//GO:0016151//GO:0003677//GO:0005524//GO:0004812	nucleotide binding//nickel cation binding//DNA binding//ATP binding//aminoacyl-tRNA ligase activity	--	--	KOG2324	Prolyl-tRNA synthetase
716	Cluster-2341.0	1712	2476611	XP_001946200.2	488	3.2e-46	PREDICTED: uncharacterized protein LOC100158920 [Acyrthosiphon pisum]	XM_001946165.4	XM_001946165	915	0	PREDICTED: Acyrthosiphon pisum uncharacterized LOC100158920 (LOC100158920), mRNA	--	--	--	--	--	--	--	--	--	--	--	--	--	--	--	--	--	--
717	Cluster-4319.0	1493	2475997	XP_001948320.2	1500	1.3e-163	PREDICTED: myeloid differentiation primary response protein MyD88 isoform X1 [Acyrthosiphon pisum]	XM_001948285.4	XM_001948285	976	0	PREDICTED: Acyrthosiphon pisum myeloid differentiation primary response protein MyD88 (LOC100160335), transcript variant X1, mRNA	K04729	MYD88	myeloid differentiation primary response protein MyD88	http://www.genome.jp/dbget-bin/www_bget?ko:K04729	--	--	--	--	PF01582//PF13676//PF07065	TIR domain//TIR domain//D123	GO:0007049//GO:0007165	cell cycle//signal transduction	GO:0005515	protein binding	--	--	--	--
718	Cluster-9758.0	731	2474614	XP_003241120.1	531	1.4e-51	PREDICTED: coiled-coil-helix-coiled-coil-helix domain-containing protein 1 [Acyrthosiphon pisum]	XM_003241072.2	XM_003241072	561	0	PREDICTED: Acyrthosiphon pisum coiled-coil-helix-coiled-coil-helix domain-containing protein 1 (LOC100158813), mRNA	--	--	--	--	Q96BP2	126	4.9e-06	Coiled-coil-helix-coiled-coil-helix domain-containing protein 1 OS=Homo sapiens OX=9606 GN=CHCHD1 PE=1 SV=1	PF05676//PF02297	NADH-ubiquinone oxidoreductase B18 subunit (NDUFB7)//Cytochrome oxidase c subunit VIb	GO:0006814//GO:0006744//GO:0006120//GO:0015992//GO:0006118//GO:0006123	sodium ion transport//ubiquinone biosynthetic process//mitochondrial electron transport, NADH to ubiquinone//proton transport//obsolete electron transport//mitochondrial electron transport, cytochrome c to oxygen	GO:0004129//GO:0003954//GO:0008137	cytochrome-c oxidase activity//NADH dehydrogenase activity//NADH dehydrogenase (ubiquinone) activity	GO:0005739//GO:0045277	mitochondrion//respiratory chain complex IV	--	--
719	Cluster-2152.0	589	10794772	XP_022179257.1	565	1.3e-55	uncharacterized protein LOC111039908 [Myzus persicae]	XM_015515947.1	XM_015515947	174	6.27e-84	PREDICTED: Diuraphis noxia zinc finger MYM-type protein 1-like (LOC107167056), mRNA	--	--	--	--	--	--	--	--	--	--	--	--	--	--	--	--	--	--
720	Cluster-12447.0	1194	1595301	BAH71862.1	780	3.1e-80	ACYPI004550 [Acyrthosiphon pisum]	NM_001162104.1	AK341477	774	0	Acyrthosiphon pisum translocator protein-like (LOC100163461), mRNA >dbj|AK341477.1| Acyrthosiphon pisum ACYPI004550 mRNA, clone: 357K21, complete cds, full-insert cDNA sequence based on the ESTs (5'-EST:FF293365, 3'-EST:FF294297)	K05770	BZRP	benzodiazapine receptor	http://www.genome.jp/dbget-bin/www_bget?ko:K05770	P30536	348	1.4e-31	Translocator protein OS=Homo sapiens OX=9606 GN=TSPO PE=1 SV=3	PF03073	TspO/MBR family	--	--	--	--	GO:0016021	integral component of membrane	KOG3797	Peripheral-type benzodiazepine receptor and related proteins
721	Cluster-8214.0	325	5433090	XP_011567614.1	301	2.9e-25	PREDICTED: probable sulfate..thiosulfate import ATP-binding protein CysA [Plutella xylostella]	CP017979.1	CP017979	325	3.78e-168	Escherichia coli str. K-12 substr. W3110 substrain ZK126 genome	--	--	--	--	P37313	318	1.2e-28	Dipeptide transport ATP-binding protein DppF OS=Escherichia coli (strain K12) OX=83333 GN=dppF PE=3 SV=1	PF08352//PF01695//PF13683//PF05125//PF03193//PF00005	Oligopeptide/dipeptide transporter, C-terminal region//IstB-like ATP binding protein//Integrase core domain//Phage major capsid protein, P2 family//Protein of unknown function, DUF258//ABC transporter	GO:0015074//GO:0015833	DNA integration//peptide transport	GO:0005524//GO:0003924//GO:0016887//GO:0000166//GO:0005525	ATP binding//GTPase activity//ATPase activity//nucleotide binding//GTP binding	GO:0019028	viral capsid	--	--
722	Cluster-10514.0	1205	1594532	BAH71093.1	1437	2e-156	ACYPI003817 [Acyrthosiphon pisum]	NM_001293529.1	NM_001293529	974	0	Acyrthosiphon pisum protein AATF-like (LOC100575200), mRNA	K14782	AATF, BFR2	protein AATF/BFR2	http://www.genome.jp/dbget-bin/www_bget?ko:K14782	Q5ZIM6	361	4.5e-33	Protein AATF OS=Gallus gallus OX=9031 GN=AATF PE=2 SV=1	PF08164	Apoptosis-antagonizing transcription factor, C-terminal	--	--	--	--	GO:0005634	nucleus	KOG2773	Apoptosis antagonizing transcription factor/protein transport protein
723	Cluster-1569.0	415	5431189	XP_011565490.1	277	2.3e-22	PREDICTED: beta-citrylglutamate synthase B-like [Plutella xylostella]	CP017979.1	CP017979	415	0	Escherichia coli str. K-12 substr. W3110 substrain ZK126 genome	--	--	--	--	Q1RE73	306	3.7e-27	Ribosomal protein S6--L-glutamate ligase OS=Escherichia coli (strain UTI89 / UPEC) OX=364106 GN=rimK PE=3 SV=1	PF01783	Ribosomal L32p protein family	GO:0006412//GO:0042254	translation//ribosome biogenesis	GO:0003735	structural constituent of ribosome	GO:0005840//GO:0015934	ribosome//large ribosomal subunit	--	--
724	Cluster-11494.0	4370	10811905	XP_022177499.1	5146	0	JNK-interacting protein 3 isoform X9 [Myzus persicae]	XM_008189568.2	XM_008189568	3260	0	PREDICTED: Acyrthosiphon pisum C-Jun-amino-terminal kinase-interacting protein 4 (LOC100162055), transcript variant X3, mRNA	--	--	--	--	Q58A65	1611	1.9e-177	C-Jun-amino-terminal kinase-interacting protein 4 OS=Mus musculus OX=10090 GN=Spag9 PE=1 SV=2	PF07716//PF00038//PF09726//PF07542//PF01496//PF02025	Basic region leucine zipper//Intermediate filament protein//Transmembrane protein//ATP12 chaperone protein//V-type ATPase 116kDa subunit family//Interleukin 5	GO:0040007//GO:0006955//GO:0015992//GO:0006355//GO:0043461//GO:0007165//GO:0015991//GO:0008283	growth//immune response//proton transport//regulation of transcription, DNA-templated//proton-transporting ATP synthase complex assembly//signal transduction//ATP hydrolysis coupled proton transport//cell proliferation	GO:0005198//GO:0015078//GO:0043565//GO:0008083//GO:0005137//GO:0003700	structural molecule activity//hydrogen ion transmembrane transporter activity//sequence-specific DNA binding//growth factor activity//interleukin-5 receptor binding//transcription factor activity, sequence-specific DNA binding	GO:0005576//GO:0005895//GO:0016021//GO:0005667//GO:0033179//GO:0005882	extracellular region//interleukin-5 receptor complex//integral component of membrane//transcription factor complex//proton-transporting V-type ATPase, V0 domain//intermediate filament	KOG2077	JNK/SAPK-associated protein-1
725	Cluster-2673.0	1928	9601553	XP_018579662.1	1109	3.5e-118	stomatin-like protein 2, mitochondrial [Anoplophora glabripennis]	XM_001944369.4	XM_001944369	1306	0	PREDICTED: Acyrthosiphon pisum stomatin-like protein 2, mitochondrial (LOC100169460), transcript variant X1, mRNA	--	--	--	--	Q99JB2	992	4.9e-106	Stomatin-like protein 2, mitochondrial OS=Mus musculus OX=10090 GN=Stoml2 PE=1 SV=1	PF04313	Type I restriction enzyme R protein N terminus (HSDR_N)	GO:0006304	DNA modification	GO:0003677//GO:0004519	DNA binding//endonuclease activity	--	--	KOG2620	Prohibitins and stomatins of the PID superfamily
726	Cluster-11658.0	2773	1168307	XP_001952484.1	4174	0	PREDICTED: ubiquitin carboxyl-terminal hydrolase 5 isoform X1 [Acyrthosiphon pisum]	XM_001952449.4	XM_001952449	2485	0	PREDICTED: Acyrthosiphon pisum ubiquitin carboxyl-terminal hydrolase 5 (LOC100159829), transcript variant X1, mRNA	K11836	USP5_13, UBP14	ubiquitin carboxyl-terminal hydrolase 5/13	http://www.genome.jp/dbget-bin/www_bget?ko:K11836	P45974	2012	3.8e-224	Ubiquitin carboxyl-terminal hydrolase 5 OS=Homo sapiens OX=9606 GN=USP5 PE=1 SV=2	PF00443//PF02148//PF01990	Ubiquitin carboxyl-terminal hydrolase//Zn-finger in ubiquitin-hydrolases and other protein//ATP synthase (F/14-kDa) subunit	GO:0016579//GO:0034220	protein deubiquitination//ion transmembrane transport	GO:0008270//GO:0036459	zinc ion binding//ubiquitinyl hydrolase activity	--	--	KOG0944	Ubiquitin-specific protease UBP14
727	Cluster-4627.0	1482	8345959	XP_016659656.1	1303	8.7e-141	PREDICTED: mothers against decapentaplegic homolog 3 [Acyrthosiphon pisum]	XM_016804167.1	XM_016804167	1140	0	PREDICTED: Acyrthosiphon pisum mothers against decapentaplegic homolog 3 (LOC100164536), transcript variant X1, mRNA	K04500	SMAD2_3	mothers against decapentaplegic homolog 2/3	http://www.genome.jp/dbget-bin/www_bget?ko:K04500	P84022	1084	8.1e-117	Mothers against decapentaplegic homolog 3 OS=Homo sapiens OX=9606 GN=SMAD3 PE=1 SV=1	PF10401//PF03166	Interferon-regulatory factor 3//MH2 domain	GO:0006355	regulation of transcription, DNA-templated	GO:0003700	transcription factor activity, sequence-specific DNA binding	GO:0005622//GO:0005667	intracellular//transcription factor complex	KOG3701	TGFbeta receptor signaling protein SMAD and related proteins
728	Cluster-10477.2	536	2474719	XP_003241317.1	598	1.8e-59	PREDICTED: guanine nucleotide-binding protein-like 1 [Acyrthosiphon pisum]	XM_003241269.3	XM_003241269	420	0	PREDICTED: Acyrthosiphon pisum guanine nucleotide-binding protein-like 1 (LOC100166224), mRNA	--	--	--	--	--	--	--	--	--	--	--	--	--	--	--	--	--	--
729	Cluster-6353.0	487	10794899	XP_022180830.1	181	3.6e-11	uncharacterized protein LOC111041004 [Myzus persicae]	AC202215.4	AC202215	303	9.96e-156	Acyrthosiphon pisum BAC VMRC38-20-A10 (Benaroya Research Institute VMRC38 Acrythosiphon pisum (Pea Aphid) BAC library) complete sequence	--	--	--	--	--	--	--	--	--	--	--	--	--	--	--	--	--	--
730	Cluster-10477.0	1147	2474719	XP_003241317.1	1460	4.2e-159	PREDICTED: guanine nucleotide-binding protein-like 1 [Acyrthosiphon pisum]	XM_003241269.3	XM_003241269	964	0	PREDICTED: Acyrthosiphon pisum guanine nucleotide-binding protein-like 1 (LOC100166224), mRNA	--	--	--	--	Q4R8D2	574	8.6e-58	Guanine nucleotide-binding protein-like 1 OS=Macaca fascicularis OX=9541 GN=GNL1 PE=2 SV=1	PF01926//PF03193//PF04546//PF02421//PF04548	50S ribosome-binding GTPase//Protein of unknown function, DUF258//Sigma-70, non-essential region//Ferrous iron transport protein B//AIG1 family	GO:0015684//GO:0006355//GO:0006352	ferrous iron transport//regulation of transcription, DNA-templated//DNA-templated transcription, initiation	GO:0003677//GO:0003924//GO:0005525//GO:0003700//GO:0015093//GO:0016987	DNA binding//GTPase activity//GTP binding//transcription factor activity, sequence-specific DNA binding//ferrous iron transmembrane transporter activity//sigma factor activity	GO:0016021//GO:0005667	integral component of membrane//transcription factor complex	KOG1424	Predicted GTP-binding protein MMR1
731	Cluster-10345.0	321	--	--	--	--	--	XR_001679347.1	XR_001679347	135	1.56e-62	PREDICTED: Acyrthosiphon pisum uncharacterized LOC107883517 (LOC107883517), ncRNA	--	--	--	--	--	--	--	--	--	--	--	--	--	--	--	--	--	--
732	Cluster-4305.0	1353	1167894	XP_001944808.1	615	4.8e-61	PREDICTED: protein cornichon [Acyrthosiphon pisum]	XM_001944773.4	XM_001944773	1006	0	PREDICTED: Acyrthosiphon pisum protein cornichon (LOC100158745), mRNA	--	--	--	--	P49858	468	2e-45	Protein cornichon OS=Drosophila melanogaster OX=7227 GN=cni PE=1 SV=1	PF03311	Cornichon protein	GO:0035556	intracellular signal transduction	--	--	GO:0016020	membrane	KOG2729	ER vesicle integral membrane protein involved in establishing cell polarity, signaling and protein degradation
733	Cluster-9726.0	2127	1167292	XP_001944078.1	2449	1.6e-273	PREDICTED: vinculin [Acyrthosiphon pisum]	XM_001944043.4	XM_001944043	1877	0	PREDICTED: Acyrthosiphon pisum vinculin (LOC100167107), mRNA	K05700	VCL	vinculin	http://www.genome.jp/dbget-bin/www_bget?ko:K05700	O46037	1365	3e-149	Vinculin OS=Drosophila melanogaster OX=7227 GN=Vinc PE=1 SV=1	PF04437//PF06009//PF01044//PF02901	RINT-1 / TIP-1 family//Laminin Domain II//Vinculin family//Pyruvate formate lyase-like	GO:0007155//GO:0048193	cell adhesion//Golgi vesicle transport	GO:0051015//GO:0003824	actin filament binding//catalytic activity	GO:0005783	endoplasmic reticulum	KOG3681	Alpha-catenin
734	Cluster-2939.0	1781	2477062	XP_001946301.2	2047	5.6e-227	PREDICTED: facilitated trehalose transporter Tret1 [Acyrthosiphon pisum]	XM_001946266.4	XM_001946266	1442	0	PREDICTED: Acyrthosiphon pisum facilitated trehalose transporter Tret1 (LOC100165882), mRNA	--	--	--	--	Q17NV8	642	1.7e-65	Facilitated trehalose transporter Tret1 OS=Aedes aegypti OX=7159 GN=Tret1 PE=3 SV=1	PF00083//PF07690	Sugar (and other) transporter//Major Facilitator Superfamily	GO:0055085	transmembrane transport	GO:0022857	transmembrane transporter activity	GO:0016021	integral component of membrane	KOG0254	Predicted transporter (major facilitator superfamily)
735	Cluster-7419.1	650	2476629	XP_001952618.2	678	1.1e-68	PREDICTED: histone-lysine N-methyltransferase eggless [Acyrthosiphon pisum]	XM_001952583.4	XM_001952583	345	6.08e-179	PREDICTED: Acyrthosiphon pisum histone-lysine N-methyltransferase eggless (LOC100165352), mRNA	--	--	--	--	--	--	--	--	--	--	--	--	--	--	--	--	--	--
736	Cluster-12121.0	631	8351594	XP_016663830.1	838	3.1e-87	PREDICTED: ras-specific guanine nucleotide-releasing factor 2-like isoform X1 [Acyrthosiphon pisum]	XM_016808344.1	XM_016808344	537	0	PREDICTED: Acyrthosiphon pisum ras-specific guanine nucleotide-releasing factor 2-like (LOC100167303), transcript variant X5, mRNA	K04349	RASGRF1	Ras-specific guanine nucleotide-releasing factor 1	http://www.genome.jp/dbget-bin/www_bget?ko:K04349	A2CEA7	483	1.7e-47	Ras-specific guanine nucleotide-releasing factor 2 OS=Danio rerio OX=7955 GN=rasgrf2 PE=3 SV=1	PF00621//PF00612	RhoGEF domain//IQ calmodulin-binding motif	GO:0043087//GO:0035023	regulation of GTPase activity//regulation of Rho protein signal transduction	GO:0005089//GO:0005515	Rho guanyl-nucleotide exchange factor activity//protein binding	--	--	--	--
737	Cluster-5206.0	1935	8348197	XP_016660428.1	549	3.1e-53	PREDICTED: uncharacterized protein LOC103309626 [Acyrthosiphon pisum]	XM_016804939.1	XM_016804939	310	5.36e-159	PREDICTED: Acyrthosiphon pisum uncharacterized LOC103309626 (LOC103309626), mRNA	--	--	--	--	--	--	--	--	PF00091	Tubulin/FtsZ family, GTPase domain	--	--	GO:0003924	GTPase activity	--	--	--	--
738	Cluster-12813.0	349	8341335	XP_016658422.1	427	7.7e-40	PREDICTED: cytochrome P450 302a1, mitochondrial-like [Acyrthosiphon pisum]	XM_001948264.4	XM_001948264	213	7.46e-106	PREDICTED: Acyrthosiphon pisum cytochrome P450 302a1, mitochondrial (LOC100165806), mRNA	K10721	DIB	CYP302A1; ecdysteroid 22-hydroxylase	http://www.genome.jp/dbget-bin/www_bget?ko:K10721	Q9NGX9	240	1.4e-19	Cytochrome P450 302a1, mitochondrial OS=Drosophila melanogaster OX=7227 GN=dib PE=2 SV=2	--	--	--	--	--	--	--	--	KOG0159	Cytochrome P450 CYP11/CYP12/CYP24/CYP27 subfamilies
739	Cluster-3959.939	777	4414839	XP_008182822.1	866	2.1e-90	PREDICTED: follicle cell protein 3C-1 [Acyrthosiphon pisum]	XM_008184600.2	XM_008184600	675	0	PREDICTED: Acyrthosiphon pisum follicle cell protein 3C-1 (LOC103309356), mRNA	--	--	--	--	P11450	332	6.7e-30	Follicle cell protein 3C-1 OS=Drosophila melanogaster OX=7227 GN=Fcp3C PE=2 SV=3	--	--	--	--	--	--	--	--	--	--
740	Cluster-3959.1330	3095	8346525	XP_016659788.1	4422	0	PREDICTED: V-type proton ATPase 116 kDa subunit a isoform X1 [Acyrthosiphon pisum]	XM_016804299.1	XM_016804299	2855	0	PREDICTED: Acyrthosiphon pisum V-type proton ATPase 116 kDa subunit a (LOC100166586), transcript variant X1, mRNA	K02154	ATPeV0A, ATP6N	V-type H+-transporting ATPase subunit a	http://www.genome.jp/dbget-bin/www_bget?ko:K02154	Q9Z1G4	2615	5e-294	V-type proton ATPase 116 kDa subunit a isoform 1 OS=Mus musculus OX=10090 GN=Atp6v0a1 PE=1 SV=3	PF01496//PF04111	V-type ATPase 116kDa subunit family//Autophagy protein Apg6	GO:0015991//GO:0015992//GO:0006914	ATP hydrolysis coupled proton transport//proton transport//autophagy	GO:0015078	hydrogen ion transmembrane transporter activity	GO:0033179	proton-transporting V-type ATPase, V0 domain	KOG2189	Vacuolar H+-ATPase V0 sector, subunit a
741	Cluster-9409.0	348	1667622	NP_001156819.1	147	2.3e-07	F-box only protein 5 [Acyrthosiphon pisum]	NM_001163347.1	NM_001163347	274	9.15e-140	Acyrthosiphon pisum F-box only protein 5 (Fbxo5), mRNA	--	--	--	--	--	--	--	--	--	--	--	--	--	--	--	--	--	--
742	Cluster-2349.0	1466	6744229	XP_014251961.1	1359	2.8e-147	sphingolipid delta..4..-desaturase DES1 [Cimex lectularius]	NM_001162061.2	NM_001162061	1034	0	Acyrthosiphon pisum sphingolipid delta(4)-desaturase DES1-like (LOC100162405), mRNA	K04712	DEGS	sphingolipid delta-4 desaturase	http://www.genome.jp/dbget-bin/www_bget?ko:K04712	O15121	1081	1.8e-116	Sphingolipid delta(4)-desaturase DES1 OS=Homo sapiens OX=9606 GN=DEGS1 PE=1 SV=1	PF00487//PF05398	Fatty acid desaturase//PufQ cytochrome subunit	GO:0030494//GO:0006629//GO:0015979	bacteriochlorophyll biosynthetic process//lipid metabolic process//photosynthesis	--	--	--	--	KOG2987	Fatty acid desaturase
743	Cluster-787.0	4223	10793612	XP_022165178.1	5375	0	ATPase family AAA domain-containing protein 2-like [Myzus persicae]	XM_003240644.3	XM_003240644	3834	0	PREDICTED: Acyrthosiphon pisum ATPase family AAA domain-containing protein 2-like (LOC100159696), transcript variant X1, mRNA	--	--	--	--	F4IAE9	1189	1.5e-128	ATPase family AAA domain-containing protein At1g05910 OS=Arabidopsis thaliana OX=3702 GN=At1g05910 PE=2 SV=1	PF00004//PF07724//PF05496//PF00005//PF00439//PF07728//PF02562//PF04851//PF00910//PF01695//PF06309	ATPase family associated with various cellular activities (AAA)//AAA domain (Cdc48 subfamily)//Holliday junction DNA helicase ruvB N-terminus//ABC transporter//Bromodomain//AAA domain (dynein-related subfamily)//PhoH-like protein//Type III restriction enzyme, res subunit//RNA helicase//IstB-like ATP binding protein//Torsin	GO:0006310//GO:0006281	DNA recombination//DNA repair	GO:0003723//GO:0005524//GO:0005515//GO:0003677//GO:0003724//GO:0016787//GO:0009378//GO:0016887	RNA binding//ATP binding//protein binding//DNA binding//RNA helicase activity//hydrolase activity//four-way junction helicase activity//ATPase activity	GO:0005657//GO:0009379	replication fork//Holliday junction helicase complex	KOG0732	AAA+-type ATPase containing the bromodomain
744	Cluster-11349.0	360	--	--	--	--	--	--	--	--	--	--	--	--	--	--	--	--	--	--	--	--	--	--	--	--	--	--	--	--
745	Cluster-6327.0	1873	--	--	--	--	--	--	--	--	--	--	--	--	--	--	--	--	--	--	--	--	--	--	--	--	--	--	--	--
746	Cluster-5442.0	457	8330053	XP_016661717.1	357	1.3e-31	PREDICTED: probable G-protein coupled receptor 158 isoform X1 [Acyrthosiphon pisum]	XM_008186731.2	XM_008186731	407	0	PREDICTED: Acyrthosiphon pisum probable G-protein coupled receptor 158 (LOC100569647), transcript variant X2, mRNA	--	--	--	--	--	--	--	--	PF00410	Ribosomal protein S8	GO:0042254//GO:0006412	ribosome biogenesis//translation	GO:0003735	structural constituent of ribosome	GO:0005840	ribosome	--	--
747	Cluster-3041.0	495	1595716	BAH72277.1	139	2.7e-06	ACYPI003569 [Acyrthosiphon pisum]	XM_008185338.2	XM_008185338	358	0	PREDICTED: Acyrthosiphon pisum uncharacterized LOC100162417 (LOC100162417), transcript variant X1, mRNA	--	--	--	--	--	--	--	--	--	--	--	--	--	--	--	--	--	--
748	Cluster-1422.0	366	--	--	--	--	--	--	--	--	--	--	--	--	--	--	--	--	--	--	--	--	--	--	--	--	--	--	--	--
749	Cluster-11510.0	619	--	--	--	--	--	--	--	--	--	--	--	--	--	--	--	--	--	--	--	--	--	--	--	--	--	--	--	--
750	Cluster-7736.0	476	--	--	--	--	--	AK342540.1	AK342540	291	4.55e-149	Acyrthosiphon pisum mRNA, clone: 43M11, full-insert cDNA sequence based on the ESTs (5'-EST:EX605506, 3'-EST:EX606517)	--	--	--	--	--	--	--	--	--	--	--	--	--	--	--	--	--	--
751	Cluster-11718.0	2286	2476531	XP_001946065.2	3147	0	PREDICTED: PH-interacting protein [Acyrthosiphon pisum]	XM_001946030.4	XM_001946030	2123	0	PREDICTED: Acyrthosiphon pisum PH-interacting protein (LOC100165179), mRNA	K11797	PHIP, WDR11	PH-interacting protein	http://www.genome.jp/dbget-bin/www_bget?ko:K11797	Q9NSI6	718	3.4e-74	Bromodomain and WD repeat-containing protein 1 OS=Homo sapiens OX=9606 GN=BRWD1 PE=1 SV=4	PF00439	Bromodomain	--	--	GO:0005515	protein binding	--	--	KOG1474	Transcription initiation factor TFIID, subunit BDF1 and related bromodomain proteins
752	Cluster-7504.0	392	--	--	--	--	--	XM_008187637.2	XM_008187637	314	6.06e-162	PREDICTED: Acyrthosiphon pisum chemosensory protein-like (ORF4), transcript variant X1, mRNA	--	--	--	--	--	--	--	--	PF00287	Sodium / potassium ATPase beta chain	GO:0006813//GO:0006814	potassium ion transport//sodium ion transport	--	--	GO:0005890	sodium:potassium-exchanging ATPase complex	--	--
753	Cluster-11998.0	449	--	--	--	--	--	--	--	--	--	--	--	--	--	--	--	--	--	--	--	--	--	--	--	--	--	--	--	--
754	Cluster-11998.1	2062	4413299	XP_008180304.1	2237	6e-249	PREDICTED: sialin [Acyrthosiphon pisum]	XM_008182081.2	XM_008182081	1574	0	PREDICTED: Acyrthosiphon pisum sialin (LOC100165106), transcript variant X1, mRNA	--	--	--	--	Q8BN82	652	1.4e-66	Sialin OS=Mus musculus OX=10090 GN=Slc17a5 PE=1 SV=2	PF00083//PF07690	Sugar (and other) transporter//Major Facilitator Superfamily	GO:0055085	transmembrane transport	GO:0022857	transmembrane transporter activity	GO:0016021	integral component of membrane	--	--
755	Cluster-11688.0	393	--	--	--	--	--	XM_008183610.2	XM_008183610	335	1.29e-173	PREDICTED: Acyrthosiphon pisum helix-loop-helix protein 2 (LOC100159190), transcript variant X2, mRNA	--	--	--	--	--	--	--	--	--	--	--	--	--	--	--	--	--	--
756	Cluster-10146.0	339	8334226	XP_016656388.1	568	3.3e-56	PREDICTED: uncharacterized protein LOC100165925 [Acyrthosiphon pisum]	XM_016800899.1	XM_016800899	303	6.73e-156	PREDICTED: Acyrthosiphon pisum uncharacterized LOC100165925 (LOC100165925), transcript variant X2, mRNA	--	--	--	--	--	--	--	--	--	--	--	--	--	--	--	--	--	--
757	Cluster-3342.0	378	--	--	--	--	--	XM_001945021.4	XM_001945021	255	3.66e-129	PREDICTED: Acyrthosiphon pisum SWI/SNF-related matrix-associated actin-dependent regulator of chromatin subfamily A-like protein 1 (LOC100159498), mRNA	--	--	--	--	--	--	--	--	--	--	--	--	--	--	--	--	--	--
758	Cluster-4574.0	1070	2477453	XP_003245793.1	860	1.5e-89	PREDICTED: poly [ADP-ribose] polymerase 12 [Acyrthosiphon pisum]	XM_003245745.3	XM_003245745	506	0	PREDICTED: Acyrthosiphon pisum poly [ADP-ribose] polymerase 12 (LOC100573364), mRNA	--	--	--	--	--	--	--	--	PF13994//PF00644	PgaD-like protein//Poly(ADP-ribose) polymerase catalytic domain	GO:0042710	biofilm formation	GO:0003950	NAD+ ADP-ribosyltransferase activity	--	--	--	--
759	Cluster-10414.1	8087	4503279	XP_008470128.1	9305	0	PREDICTED: spectrin beta chain [Diaphorina citri]	XM_008191528.2	XM_008191528	7068	0	PREDICTED: Acyrthosiphon pisum spectrin beta chain (LOC100160368), transcript variant X3, mRNA	K06115	SPTB	spectrin beta	http://www.genome.jp/dbget-bin/www_bget?ko:K06115	Q00963	8472	0	Spectrin beta chain OS=Drosophila melanogaster OX=7227 GN=beta-Spec PE=1 SV=2	PF00307//PF00435	Calponin homology (CH) domain//Spectrin repeat	--	--	GO:0005515	protein binding	--	--	KOG0517	Beta-spectrin
760	Cluster-4653.0	493	8349194	XP_016661445.1	698	4.1e-71	PREDICTED: zinc finger MYM-type protein 1-like [Acyrthosiphon pisum]	XM_016805956.1	XM_016805956	427	0	PREDICTED: Acyrthosiphon pisum zinc finger MYM-type protein 1-like (LOC100575378), mRNA	--	--	--	--	--	--	--	--	--	--	--	--	--	--	--	--	--	--
761	Cluster-3959.414	538	--	--	--	--	--	--	--	--	--	--	--	--	--	--	--	--	--	--	--	--	--	--	--	--	--	--	--	--
762	Cluster-3959.415	2345	2478372	XP_001948155.2	2788	0	PREDICTED: myotubularin-related protein 9 [Acyrthosiphon pisum]	XM_001948120.4	XM_001948120	2107	0	PREDICTED: Acyrthosiphon pisum myotubularin-related protein 9 (LOC100163671), transcript variant X2, mRNA	K18084	MTMR9	myotubularin-related protein 9	http://www.genome.jp/dbget-bin/www_bget?ko:K18084	Q9Z2D0	1280	2.4e-139	Myotubularin-related protein 9 OS=Mus musculus OX=10090 GN=Mtmr9 PE=1 SV=2	PF08329	Chitinase A, N-terminal domain	GO:0006032//GO:0016998	chitin catabolic process//cell wall macromolecule catabolic process	GO:0004568	chitinase activity	--	--	KOG1089	Myotubularin-related phosphatidylinositol 3-phosphate 3-phosphatase MTM6
763	Cluster-3959.416	2894	6757230	XP_014272230.1	3016	0	26S proteasome non-ATPase regulatory subunit 2 [Halyomorpha halys]	XM_001945077.4	XM_001945077	2671	0	PREDICTED: Acyrthosiphon pisum 26S proteasome non-ATPase regulatory subunit 2 (LOC100169499), mRNA	K03028	PSMD2, RPN1	26S proteasome regulatory subunit N1	http://www.genome.jp/dbget-bin/www_bget?ko:K03028	Q8VDM4	2290	2.3e-256	26S proteasome non-ATPase regulatory subunit 2 OS=Mus musculus OX=10090 GN=Psmd2 PE=1 SV=1	PF02535//PF03694//PF01312//PF05236	ZIP Zinc transporter//Erg28 like protein//FlhB HrpN YscU SpaS Family//Transcription initiation factor TFIID component TAF4 family	GO:0055085//GO:0030001//GO:0006352//GO:0009306	transmembrane transport//metal ion transport//DNA-templated transcription, initiation//protein secretion	GO:0046873	metal ion transmembrane transporter activity	GO:0016020//GO:0005669//GO:0016021	membrane//transcription factor TFIID complex//integral component of membrane	KOG2005	26S proteasome regulatory complex, subunit RPN1/PSMD2
764	Cluster-3959.417	1073	1657171	NP_001156125.1	586	8.7e-58	uncharacterized protein LOC100161746 [Acyrthosiphon pisum]	NM_001162653.1	AK340281	918	0	Acyrthosiphon pisum CG7841-like (LOC100161746), mRNA >dbj|AK340281.1| Acyrthosiphon pisum ACYPI002945 mRNA, clone: 128K19, complete cds, full-insert cDNA sequence based on the ESTs (5'-EST:EX606898, 3'-EST:EX609125)	--	--	--	--	--	--	--	--	--	--	--	--	--	--	--	--	--	--
765	Cluster-3959.410	2132	10804989	XP_022169876.1	650	6.6e-65	profilin-like [Myzus persicae]	XM_008182239.2	XM_008182239	1593	0	PREDICTED: Acyrthosiphon pisum profilin-like (LOC100160884), transcript variant X1, mRNA	K05759	PFN	profilin	http://www.genome.jp/dbget-bin/www_bget?ko:K05759	Q6QEJ7	521	2.2e-51	Profilin OS=Apis mellifera OX=7460 PE=2 SV=1	PF08096	Bombolitin family	GO:0009405//GO:0043303	pathogenesis//mast cell degranulation	--	--	GO:0005576	extracellular region	KOG1755	Profilin
766	Cluster-3959.411	2321	8342479	XP_016658709.1	1088	1.2e-115	PREDICTED: acetylcholine receptor subunit alpha-like 1 [Acyrthosiphon pisum]	XM_016803220.1	XM_016803220	649	0	PREDICTED: Acyrthosiphon pisum acetylcholine receptor subunit alpha-like 1 (LOC100571771), mRNA	K04805	CHRNA3	nicotinic acetylcholine receptor alpha-3	http://www.genome.jp/dbget-bin/www_bget?ko:K04805	Q8R4G9	244	3.2e-19	Neuronal acetylcholine receptor subunit alpha-3 OS=Mus musculus OX=10090 GN=Chrna3 PE=2 SV=1	PF02932//PF02931	Neurotransmitter-gated ion-channel transmembrane region//Neurotransmitter-gated ion-channel ligand binding domain	GO:0006810//GO:0006811	transport//ion transport	GO:0005230	extracellular ligand-gated ion channel activity	GO:0016020	membrane	KOG3645	Acetylcholine receptor
767	Cluster-3959.412	749	7699635	XP_015372331.1	550	9.1e-54	PREDICTED: uncharacterized protein LOC107167686 [Diuraphis noxia]	XM_015516845.1	XM_015516845	288	3.43e-147	PREDICTED: Diuraphis noxia uncharacterized LOC107167686 (LOC107167686), mRNA	--	--	--	--	Q9W1C9	178	4.7e-12	Ejaculatory bulb-specific protein 3 OS=Drosophila melanogaster OX=7227 GN=EbpIII PE=2 SV=2	PF00660	Seripauperin and TIP1 family	GO:0006950	response to stress	--	--	--	--	--	--
768	Cluster-3959.413	1565	10802701	XP_022167357.1	396	1.4e-35	prothymosin alpha-like [Myzus persicae]	NM_001162300.1	AK339948	1341	0	Acyrthosiphon pisum uncharacterized LOC100168004 (LOC100168004), mRNA >dbj|AK339948.1| Acyrthosiphon pisum ACYPI008743 mRNA, clone: 465G23, complete cds, full-insert cDNA sequence based on the ESTs (5'-EST:FF297603, 3'-EST:FF299662)	--	--	--	--	--	--	--	--	PF02535//PF09507//PF07964//PF05053//PF15724//PF04931	ZIP Zinc transporter//DNA polymerase subunit Cdc27//Rec10 / Red1//Menin//TMEM119 family//DNA polymerase phi	GO:0006260//GO:0051598//GO:0007131//GO:0030001//GO:0006351//GO:0001503//GO:0055085	DNA replication//meiotic recombination checkpoint//reciprocal meiotic recombination//metal ion transport//transcription, DNA-templated//ossification//transmembrane transport	GO:0003677//GO:0005198//GO:0003887//GO:0046873	DNA binding//structural molecule activity//DNA-directed DNA polymerase activity//metal ion transmembrane transporter activity	GO:0005634//GO:0042575//GO:0016020	nucleus//DNA polymerase complex//membrane	--	--
769	Cluster-3950.0	454	10801773	XP_022166333.1	278	1.9e-22	reactive oxygen species modulator 1 [Myzus persicae]	XM_003245677.3	XM_003245677	397	0	PREDICTED: Acyrthosiphon pisum reactive oxygen species modulator 1 (LOC100571389), mRNA	--	--	--	--	Q6NYD1	170	2.4e-11	Reactive oxygen species modulator 1 OS=Danio rerio OX=7955 GN=romo1 PE=3 SV=1	--	--	--	--	--	--	--	--	KOG4096	Uncharacterized conserved protein
770	Cluster-11355.0	485	--	--	--	--	--	--	--	--	--	--	--	--	--	--	--	--	--	--	PF06437	IMP-specific 5'-nucleotidase	GO:0009117//GO:0006190	nucleotide metabolic process//inosine salvage	GO:0050483//GO:0000287	IMP 5'-nucleotidase activity//magnesium ion binding	--	--	--	--
771	Cluster-3959.418	654	--	--	--	--	--	--	--	--	--	--	--	--	--	--	--	--	--	--	--	--	--	--	--	--	--	--	--	--
772	Cluster-3959.419	3881	10797392	XP_022161461.1	2940	0	uncharacterized protein LOC111027396 [Myzus persicae]	XM_003242781.3	XM_003242781	2313	0	PREDICTED: Acyrthosiphon pisum uncharacterized LOC100572035 (LOC100572035), mRNA	--	--	--	--	--	--	--	--	PF13855//PF05923	Leucine rich repeat//APC cysteine-rich region	GO:0016055	Wnt signaling pathway	GO:0005515	protein binding	--	--	--	--
773	Cluster-6950.0	3493	2476480	XP_001946947.2	2934	0	PREDICTED: uncharacterized protein LOC100160431 isoform X1 [Acyrthosiphon pisum]	XM_001946912.4	XM_001946912	2122	0	PREDICTED: Acyrthosiphon pisum uncharacterized LOC100160431 (LOC100160431), transcript variant X1, mRNA	--	--	--	--	--	--	--	--	--	--	--	--	--	--	--	--	--	--
774	Cluster-114.0	916	8338106	XP_016657470.1	582	2.2e-57	PREDICTED: uncharacterized protein LOC100167995 isoform X6 [Acyrthosiphon pisum]	XM_008181801.2	XM_008181801	195	2.11e-95	PREDICTED: Acyrthosiphon pisum titin homolog (LOC103308440), mRNA	--	--	--	--	--	--	--	--	--	--	--	--	--	--	--	--	--	--
775	Cluster-4371.0	1945	1660381	NP_001156612.1	1727	7.8e-190	easily shocked [Acyrthosiphon pisum]	NM_001163140.1	NM_001163140	1480	0	Acyrthosiphon pisum easily shocked (Eas), mRNA	K00894	ETNK, EKI	ethanolamine kinase	http://www.genome.jp/dbget-bin/www_bget?ko:K00894	Q9HBU6	703	1.6e-72	Ethanolamine kinase 1 OS=Homo sapiens OX=9606 GN=ETNK1 PE=1 SV=1	--	--	--	--	--	--	--	--	KOG4720	Ethanolamine kinase
776	Cluster-12032.0	845	5431535	XP_011565873.1	594	8.1e-59	PREDICTED: sec-independent protein translocase protein TATC, chloroplastic-like [Plutella xylostella]	CP017669.1	CP017669	845	0	Escherichia coli strain PA20, complete genome	--	--	--	--	P69424	627	4.5e-64	Sec-independent protein translocase protein TatC OS=Escherichia coli O157:H7 OX=83334 GN=tatC PE=3 SV=2	PF01026//PF00902	TatD related DNase//Sec-independent protein translocase protein (TatC)	GO:0006308	DNA catabolic process	GO:0016888	endodeoxyribonuclease activity, producing 5'-phosphomonoesters	GO:0016021	integral component of membrane	KOG3020	TatD-related DNase
777	Cluster-13043.0	363	10798609	XP_022162800.1	503	1.2e-48	kinesin-like protein KIF21A [Myzus persicae]	XM_008180344.2	XM_008180344	351	0	PREDICTED: Acyrthosiphon pisum kinesin-like protein KIF21A (LOC100165731), transcript variant X3, mRNA	K10395	KIF4_21_27	kinesin family member 4/21/27	http://www.genome.jp/dbget-bin/www_bget?ko:K10395	O75037	443	4.2e-43	Kinesin-like protein KIF21B OS=Homo sapiens OX=9606 GN=KIF21B PE=1 SV=2	PF00225	Kinesin motor domain	GO:0007017//GO:0007018	microtubule-based process//microtubule-based movement	GO:0005524//GO:0003777//GO:0008017	ATP binding//microtubule motor activity//microtubule binding	GO:0005874//GO:0045298	microtubule//tubulin complex	KOG0244	Kinesin-like protein
778	Cluster-5848.0	343	--	--	--	--	--	--	--	--	--	--	--	--	--	--	--	--	--	--	--	--	--	--	--	--	--	--	--	--
779	Cluster-1719.0	861	1657148	NP_001156237.1	720	2e-73	neuroglobin-like [Acyrthosiphon pisum]	NM_001162765.1	AK340338	690	0	Acyrthosiphon pisum neuroglobin-like (LOC100166348), mRNA >dbj|AK340338.1| Acyrthosiphon pisum ACYPI007228 mRNA, clone: 493C5, complete cds, full-insert cDNA sequence based on the ESTs (5'-EST:FF332492, 3'-EST:FF333927)	--	--	--	--	Q90YJ2	176	9.1e-12	Neuroglobin OS=Danio rerio OX=7955 GN=ngb PE=1 SV=1	PF00042	Globin	--	--	GO:0020037//GO:0019825	heme binding//oxygen binding	--	--	--	--
780	Cluster-8584.0	2893	8338950	XP_016657786.1	1162	3.8e-124	PREDICTED: uncharacterized protein LOC100569654 isoform X1 [Acyrthosiphon pisum]	XM_008182187.2	XM_008182187	1527	0	PREDICTED: Acyrthosiphon pisum uncharacterized LOC100569654 (LOC100569654), transcript variant X2, mRNA	--	--	--	--	--	--	--	--	--	--	--	--	--	--	--	--	--	--
781	Cluster-12534.0	1779	8329354	XP_016657625.1	1348	6.3e-146	PREDICTED: transmembrane and ubiquitin-like domain-containing protein 1 [Acyrthosiphon pisum]	XM_016802136.1	XM_016802136	1211	0	PREDICTED: Acyrthosiphon pisum transmembrane and ubiquitin-like domain-containing protein 1 (LOC100161486), transcript variant X1, mRNA	--	--	--	--	Q3KPV4	188	7.7e-13	Transmembrane and ubiquitin-like domain-containing protein 1 OS=Xenopus laevis OX=8355 GN=tmub1 PE=2 SV=1	PF12753//PF00240//PF06418	Nuclear pore complex subunit Nro1//Ubiquitin family//CTP synthase N-terminus	GO:0006221//GO:0006206	pyrimidine nucleotide biosynthetic process//pyrimidine nucleobase metabolic process	GO:0005515//GO:0003883	protein binding//CTP synthase activity	GO:0005634	nucleus	--	--
782	Cluster-4895.0	332	--	--	--	--	--	--	--	--	--	--	--	--	--	--	--	--	--	--	--	--	--	--	--	--	--	--	--	--
783	Cluster-13152.0	2108	10812208	XP_022177837.1	3060	0	modular serine protease-like isoform X1 [Myzus persicae]	XM_015513972.1	XM_015513972	1234	0	PREDICTED: Diuraphis noxia uncharacterized LOC107165639 (LOC107165639), mRNA	K06233	LRP2	low density lipoprotein-related protein 2	http://www.genome.jp/dbget-bin/www_bget?ko:K06233	Q9VER6	629	6.6e-64	Modular serine protease OS=Drosophila melanogaster OX=7227 GN=modSP PE=1 SV=2	PF00089//PF00666//PF00057	Trypsin//Cathelicidin//Low-density lipoprotein receptor domain class A	GO:0006952//GO:0006508	defense response//proteolysis	GO:0004252//GO:0005515	serine-type endopeptidase activity//protein binding	GO:0005576	extracellular region	KOG1215	Low-density lipoprotein receptors containing Ca2+-binding EGF-like domains
784	Cluster-7393.0	4644	2478364	XP_003247185.1	4573	0	PREDICTED: discoidin domain-containing receptor 2 [Acyrthosiphon pisum]	XM_003247137.3	XM_003247137	3681	0	PREDICTED: Acyrthosiphon pisum discoidin domain-containing receptor 2 (LOC100571057), mRNA	K05125	DDR2, TKT	discoidin domain receptor family member 2	http://www.genome.jp/dbget-bin/www_bget?ko:K05125	Q95ZV7	576	2e-57	Discoidin domain-containing receptor tyrosine kinase B OS=Caenorhabditis elegans OX=6239 GN=svh-4 PE=1 SV=1	PF00069//PF07714//PF06293	Protein kinase domain//Protein tyrosine kinase//Lipopolysaccharide kinase (Kdo/WaaP) family	GO:0006468	protein phosphorylation	GO:0016773//GO:0005524//GO:0004672	phosphotransferase activity, alcohol group as acceptor//ATP binding//protein kinase activity	GO:0016020	membrane	KOG1094	Discoidin domain receptor DDR1
785	Cluster-1004.0	1810	4416532	XP_008185766.1	1956	2e-216	PREDICTED: inositol 1,4,5-trisphosphate receptor [Acyrthosiphon pisum]	XM_008187544.2	XM_008187544	1636	0	PREDICTED: Acyrthosiphon pisum inositol 1,4,5-trisphosphate receptor (LOC100163622), transcript variant X2, mRNA	K04958	ITPR1	inositol 1,4,5-triphosphate receptor type 1	http://www.genome.jp/dbget-bin/www_bget?ko:K04958	P29993	514	1.2e-50	Inositol 1,4,5-trisphosphate receptor OS=Drosophila melanogaster OX=7227 GN=Itp-r83A PE=2 SV=3	--	--	--	--	--	--	--	--	KOG3533	Inositol 1,4,5-trisphosphate receptor
786	Cluster-6065.0	2087	10794358	XP_022174095.1	2737	6.4e-307	heat shock factor protein 1 isoform X1 [Myzus persicae]	XM_015516838.1	XM_015516838	1443	0	PREDICTED: Diuraphis noxia heat shock factor protein (LOC107167682), transcript variant X1, mRNA	K09414	HSF1	heat shock transcription factor 1	http://www.genome.jp/dbget-bin/www_bget?ko:K09414	P22813	416	3.3e-39	Heat shock factor protein OS=Drosophila melanogaster OX=7227 GN=Hsf PE=1 SV=1	PF00447//PF06005	HSF-type DNA-binding//Protein of unknown function (DUF904)	GO:0043093//GO:0000917//GO:0006355	FtsZ-dependent cytokinesis//barrier septum assembly//regulation of transcription, DNA-templated	GO:0003700//GO:0043565	transcription factor activity, sequence-specific DNA binding//sequence-specific DNA binding	GO:0005667//GO:0005737//GO:0005634	transcription factor complex//cytoplasm//nucleus	KOG0627	Heat shock transcription factor
787	Cluster-5238.0	625	8345624	XP_016659567.1	639	3.6e-64	PREDICTED: epoxide hydrolase 4-like isoform X2 [Acyrthosiphon pisum]	FP924978.1	FP924978	480	0	Acyrthosiphon pisum mRNA, clone: ACI0AAF8YL04, full-insert cDNA sequence based on ESTs (5'-EST:ACI0AAF8YL04AAM1, 3'-EST ACI2AAF2YG21BBM1)	--	--	--	--	G5EBI4	127	3.2e-06	Epoxide hydrolase 1 OS=Caenorhabditis elegans OX=6239 GN=ceeh-1 PE=1 SV=1	--	--	--	--	--	--	--	--	--	--
788	Cluster-12680.5	2562	12031671	PSN29272.1	1858	6.6e-205	Sphingosine-1-phosphate lyase [Blattella germanica]	XM_001943064.4	XM_001943064	1816	0	PREDICTED: Acyrthosiphon pisum sphingosine-1-phosphate lyase (LOC100162296), mRNA	K01634	SGPL1, DPL1	sphinganine-1-phosphate aldolase	http://www.genome.jp/dbget-bin/www_bget?ko:K01634	Q9V7Y2	1727	3.9e-191	Sphingosine-1-phosphate lyase OS=Drosophila melanogaster OX=7227 GN=Sply PE=1 SV=1	PF05889//PF00282	O-phosphoseryl-tRNA(Sec) selenium transferase, SepSecS//Pyridoxal-dependent decarboxylase conserved domain	GO:0019752	carboxylic acid metabolic process	GO:0016740//GO:0030170//GO:0016831	transferase activity//pyridoxal phosphate binding//carboxy-lyase activity	--	--	KOG1383	Glutamate decarboxylase/sphingosine phosphate lyase
789	Cluster-12584.0	2038	4412183	XP_008178439.1	1413	2.1e-153	PREDICTED: thiamin pyrophosphokinase 1 isoform X1 [Acyrthosiphon pisum]	XM_001945033.4	XM_001945033	1345	0	PREDICTED: Acyrthosiphon pisum thiamin pyrophosphokinase 1 (LOC100164377), transcript variant X3, mRNA	K00949	thiN, TPK1, THI80	thiamine pyrophosphokinase	http://www.genome.jp/dbget-bin/www_bget?ko:K00949	Q9H3S4	417	2.5e-39	Thiamin pyrophosphokinase 1 OS=Homo sapiens OX=9606 GN=TPK1 PE=1 SV=1	PF04265//PF04263	Thiamin pyrophosphokinase, vitamin B1 binding domain//Thiamin pyrophosphokinase, catalytic domain	GO:0006772//GO:0009229	thiamine metabolic process//thiamine diphosphate biosynthetic process	GO:0030975//GO:0004788//GO:0005524	thiamine binding//thiamine diphosphokinase activity//ATP binding	--	--	KOG3153	Thiamine pyrophosphokinase
790	Cluster-5657.0	386	--	--	--	--	--	--	--	--	--	--	--	--	--	--	--	--	--	--	--	--	--	--	--	--	--	--	--	--
791	Cluster-1739.0	1920	2477014	XP_001942974.2	1702	6.1e-187	PREDICTED: protein gooseberry isoform X1 [Acyrthosiphon pisum]	XM_001942939.4	XM_001942939	1417	0	PREDICTED: Acyrthosiphon pisum protein gooseberry (LOC100163852), transcript variant X1, mRNA	K09381	PAX3_7	paired box protein 3/7	http://www.genome.jp/dbget-bin/www_bget?ko:K09381	P09082	890	3.3e-94	Protein gooseberry OS=Drosophila melanogaster OX=7227 GN=gsb PE=2 SV=1	PF06978//PF05920//PF00046//PF00292	Ribonucleases P/MRP protein subunit POP1//Homeobox KN domain//Homeobox domain//'Paired box' domain	GO:0008033//GO:0001682//GO:0051252//GO:0006355	tRNA processing//tRNA 5'-leader removal//regulation of RNA metabolic process//regulation of transcription, DNA-templated	GO:0003677//GO:0004526	DNA binding//ribonuclease P activity	GO:0030677	ribonuclease P complex	KOG0849	Transcription factor PRD and related proteins, contain PAX and HOX domains
792	Cluster-8564.0	4299	2477535	XP_003245943.1	6273	0	PREDICTED: protein transport protein Sec24B isoform X1 [Acyrthosiphon pisum]	XM_001944058.4	XM_001944058	3197	0	PREDICTED: Acyrthosiphon pisum protein transport protein Sec24B (LOC100163637), transcript variant X2, mRNA	K14007	SEC24	protein transport protein SEC24	http://www.genome.jp/dbget-bin/www_bget?ko:K14007	O95487	2013	4.5e-224	Protein transport protein Sec24B OS=Homo sapiens OX=9606 GN=SEC24B PE=1 SV=2	PF04815//PF04810//PF04811	Sec23/Sec24 helical domain//Sec23/Sec24 zinc finger//Sec23/Sec24 trunk domain	GO:0006886//GO:0006888	intracellular protein transport//ER to Golgi vesicle-mediated transport	GO:0008270	zinc ion binding	GO:0030127	COPII vesicle coat	KOG1985	Vesicle coat complex COPII, subunit SEC24/subunit SFB2
793	Cluster-8564.1	858	2477535	XP_003245943.1	1257	1.1e-135	PREDICTED: protein transport protein Sec24B isoform X1 [Acyrthosiphon pisum]	XM_001944058.4	XM_001944058	700	0	PREDICTED: Acyrthosiphon pisum protein transport protein Sec24B (LOC100163637), transcript variant X2, mRNA	--	--	--	--	--	--	--	--	--	--	--	--	--	--	--	--	--	--
794	Cluster-8534.0	2489	2474682	XP_003241236.1	1541	3.7e-168	PREDICTED: centrosomal protein of 97 kDa [Acyrthosiphon pisum]	XM_003241188.3	XM_003241188	1086	0	PREDICTED: Acyrthosiphon pisum centrosomal protein of 97 kDa (LOC100573967), mRNA	K16717	CEP97	centrosomal protein CEP97	http://www.genome.jp/dbget-bin/www_bget?ko:K16717	Q6GPJ8	294	5.5e-25	Centrosomal protein of 97 kDa OS=Xenopus laevis OX=8355 GN=cep97 PE=2 SV=1	PF13855//PF00560//PF00612	Leucine rich repeat//Leucine Rich Repeat//IQ calmodulin-binding motif	--	--	GO:0005515	protein binding	--	--	KOG0531	Protein phosphatase 1, regulatory subunit, and related proteins
795	Cluster-2952.0	388	--	--	--	--	--	--	--	--	--	--	--	--	--	--	--	--	--	--	--	--	--	--	--	--	--	--	--	--
796	Cluster-9304.1	675	8339533	XP_016657930.1	985	3e-104	PREDICTED: uncharacterized protein MAL13P1.304 [Acyrthosiphon pisum]	XM_016802441.1	XM_016802441	487	0	PREDICTED: Acyrthosiphon pisum uncharacterized protein MAL13P1.304 (LOC103308647), transcript variant X2, mRNA	--	--	--	--	--	--	--	--	--	--	--	--	--	--	--	--	--	--
797	Cluster-9304.0	4187	8339533	XP_016657930.1	3246	0	PREDICTED: uncharacterized protein MAL13P1.304 [Acyrthosiphon pisum]	XM_016802441.1	XM_016802441	2961	0	PREDICTED: Acyrthosiphon pisum uncharacterized protein MAL13P1.304 (LOC103308647), transcript variant X2, mRNA	--	--	--	--	Q54SZ6	194	3.6e-13	Putative uncharacterized protein DDB_G0282133 OS=Dictyostelium discoideum OX=44689 GN=DDB_G0282133 PE=4 SV=2	PF03610	PTS system fructose IIA component	GO:0009401	phosphoenolpyruvate-dependent sugar phosphotransferase system	--	--	GO:0016021	integral component of membrane	--	--
798	Cluster-4396.0	322	--	--	--	--	--	--	--	--	--	--	--	--	--	--	--	--	--	--	--	--	--	--	--	--	--	--	--	--
799	Cluster-7607.0	1537	--	--	--	--	--	--	--	--	--	--	--	--	--	--	--	--	--	--	PF10415	Fumarase C C-terminus	GO:0006099	tricarboxylic acid cycle	GO:0016829	lyase activity	--	--	--	--
800	Cluster-4881.0	913	10799175	XP_022163443.1	1792	1.1e-197	uncharacterized protein LOC111028956 [Myzus persicae]	XM_016805439.1	XM_016805439	832	0	PREDICTED: Acyrthosiphon pisum uncharacterized LOC100166039 (LOC100166039), mRNA	--	--	--	--	Q9QYE5	154	3.5e-09	Protein jagged-2 OS=Mus musculus OX=10090 GN=Jag2 PE=2 SV=2	--	--	--	--	--	--	--	--	KOG1217	Fibrillins and related proteins containing Ca2+-binding EGF-like domains
801	Cluster-12680.8	559	--	--	--	--	--	--	--	--	--	--	--	--	--	--	--	--	--	--	--	--	--	--	--	--	--	--	--	--
802	Cluster-5704.0	370	--	--	--	--	--	XM_003243700.3	XM_003243700	201	3.73e-99	PREDICTED: Acyrthosiphon pisum filaggrin (LOC100568636), mRNA	--	--	--	--	--	--	--	--	--	--	--	--	--	--	--	--	--	--
803	Cluster-4701.0	3415	1169011	XP_001951570.1	2438	4.9e-272	PREDICTED: chromatin assembly factor 1 subunit A [Acyrthosiphon pisum]	XM_001951535.4	XM_001951535	2346	0	PREDICTED: Acyrthosiphon pisum chromatin assembly factor 1 subunit A (LOC100161640), mRNA	K10750	CHAF1A	chromatin assembly factor 1 subunit A	http://www.genome.jp/dbget-bin/www_bget?ko:K10750	Q5R1T0	401	3e-37	Chromatin assembly factor 1 subunit A OS=Gallus gallus OX=9031 GN=CHAF1A PE=1 SV=1	--	--	--	--	--	--	--	--	KOG4364	Chromatin assembly factor-I
804	Cluster-6153.0	326	10627974	YP_009400288.1	155	2.5e-08	NADH dehydrogenase subunit 3 ..mitochondrion.. [Baizongia pistaciae]	KU236024.1	KU236024	257	2.4e-130	Myzus persicae mitochondrion, complete genome	--	--	--	--	--	--	--	--	PF00507	NADH-ubiquinone/plastoquinone oxidoreductase, chain 3	GO:0006120//GO:0006744//GO:0055114//GO:0015992//GO:0006814	mitochondrial electron transport, NADH to ubiquinone//ubiquinone biosynthetic process//oxidation-reduction process//proton transport//sodium ion transport	GO:0008137	NADH dehydrogenase (ubiquinone) activity	--	--	--	--
805	Cluster-3904.0	1111	--	--	--	--	--	--	--	--	--	--	--	--	--	--	--	--	--	--	--	--	--	--	--	--	--	--	--	--
806	Cluster-8110.0	4083	2475658	XP_001947268.2	5162	0	PREDICTED: vascular endothelial growth factor receptor 1, partial [Acyrthosiphon pisum]	XM_001947233.4	XM_001947233	2870	0	PREDICTED: Acyrthosiphon pisum vascular endothelial growth factor receptor 1 (LOC100159169), partial mRNA	K05096	FLT1, VEGFR1	FMS-like tyrosine kinase 1	http://www.genome.jp/dbget-bin/www_bget?ko:K05096	P35969	1210	5.5e-131	Vascular endothelial growth factor receptor 1 OS=Mus musculus OX=10090 GN=Flt1 PE=1 SV=1	PF07714//PF06293//PF00069//PF13895//PF01001	Protein tyrosine kinase//Lipopolysaccharide kinase (Kdo/WaaP) family//Protein kinase domain//Immunoglobulin domain//Hepatitis C virus non-structural protein NS4b	GO:0006144//GO:0006508//GO:0006468	purine nucleobase metabolic process//proteolysis//protein phosphorylation	GO:0004252//GO:0016773//GO:0003968//GO:0004672//GO:0017111//GO:0004197//GO:0005524//GO:0005515	serine-type endopeptidase activity//phosphotransferase activity, alcohol group as acceptor//RNA-directed RNA polymerase activity//protein kinase activity//nucleoside-triphosphatase activity//cysteine-type endopeptidase activity//ATP binding//protein binding	GO:0016020//GO:0031379	membrane//RNA-directed RNA polymerase complex	KOG0200	Fibroblast/platelet-derived growth factor receptor and related receptor tyrosine kinases
807	Cluster-4701.2	2072	10810549	XP_022176013.1	1174	1.1e-125	protein enhancer of sevenless 2B [Myzus persicae]	FP925355.1	FP925355	1423	0	Acyrthosiphon pisum mRNA, clone: ACI0AAF52YJ04, full-insert cDNA sequence based on ESTs (5'-EST:ACI0AAF52YJ04AAM1, 3'-EST ACI2AAF8YH05BBM1)	K04364	GRB2	growth factor receptor-binding protein 2	http://www.genome.jp/dbget-bin/www_bget?ko:K04364	Q08012	866	2.2e-91	Protein enhancer of sevenless 2B OS=Drosophila melanogaster OX=7227 GN=drk PE=1 SV=1	PF00018//PF14604	SH3 domain//Variant SH3 domain	--	--	GO:0005515	protein binding	--	--	KOG3601	Adaptor protein GRB2, contains SH2 and SH3 domains
808	Cluster-543.0	1087	--	--	--	--	--	--	--	--	--	--	--	--	--	--	--	--	--	--	--	--	--	--	--	--	--	--	--	--
809	Cluster-10833.1	496	--	--	--	--	--	--	--	--	--	--	--	--	--	--	--	--	--	--	--	--	--	--	--	--	--	--	--	--
810	Cluster-2669.0	663	--	--	--	--	--	XM_001952677.4	XM_001952677	93	7.57e-39	PREDICTED: Acyrthosiphon pisum biotin--protein ligase (LOC100166501), transcript variant X2, mRNA	--	--	--	--	--	--	--	--	--	--	--	--	--	--	--	--	--	--
811	Cluster-9809.0	628	4417286	XP_008187027.1	704	1.1e-71	PREDICTED: RNA exonuclease 1 homolog [Acyrthosiphon pisum]	XM_008188805.2	XM_008188805	543	0	PREDICTED: Acyrthosiphon pisum RNA exonuclease 1 homolog (LOC103310455), mRNA	K14570	REX1, REXO1, RNH70	RNA exonuclease 1	http://www.genome.jp/dbget-bin/www_bget?ko:K14570	--	--	--	--	--	--	--	--	--	--	--	--	--	--
812	Cluster-3959.2699	769	--	--	--	--	--	--	--	--	--	--	--	--	--	--	--	--	--	--	--	--	--	--	--	--	--	--	--	--
813	Cluster-3959.2698	4041	2475461	XP_001942888.2	5006	0	PREDICTED: insulin-degrading enzyme isoform X1 [Acyrthosiphon pisum]	XM_001942853.4	XM_001942853	3260	0	PREDICTED: Acyrthosiphon pisum insulin-degrading enzyme (LOC100167928), transcript variant X1, mRNA	K01408	IDE, ide	insulysin	http://www.genome.jp/dbget-bin/www_bget?ko:K01408	P35559	2094	1.7e-233	Insulin-degrading enzyme OS=Rattus norvegicus OX=10116 GN=Ide PE=1 SV=1	--	--	--	--	--	--	--	--	KOG0959	N-arginine dibasic convertase NRD1 and related Zn2+-dependent endopeptidases, insulinase superfamily
814	Cluster-2049.0	1480	4416750	XP_008186158.1	909	4.2e-95	PREDICTED: molybdenum cofactor sulfurase-like isoform X1 [Acyrthosiphon pisum]	XM_016807003.1	XM_016807003	473	0	PREDICTED: Acyrthosiphon pisum molybdenum cofactor sulfurase-like (LOC100164725), transcript variant X3, mRNA	K15631	ABA3	molybdenum cofactor sulfurtransferase	http://www.genome.jp/dbget-bin/www_bget?ko:K15631	B0WSX1	395	6.4e-37	Molybdenum cofactor sulfurase 2 OS=Culex quinquefasciatus OX=7176 GN=mal2 PE=3 SV=1	PF03161//PF02434	LAGLIDADG DNA endonuclease family//Fringe-like	--	--	GO:0016757//GO:0004519	transferase activity, transferring glycosyl groups//endonuclease activity	GO:0016020	membrane	KOG2142	Molybdenum cofactor sulfurase
815	Cluster-299.0	2075	2478977	XP_001947278.2	2365	8.7e-264	PREDICTED: uncharacterized protein LOC100168564 [Acyrthosiphon pisum]	XM_001947243.3	XM_001947243	1752	0	PREDICTED: Acyrthosiphon pisum uncharacterized LOC100168564 (LOC100168564), mRNA	--	--	--	--	Q9UPW6	152	1.3e-08	DNA-binding protein SATB2 OS=Homo sapiens OX=9606 GN=SATB2 PE=1 SV=2	PF00046//PF00974	Homeobox domain//Rhabdovirus spike glycoprotein	--	--	GO:0003677	DNA binding	GO:0019031	viral envelope	KOG3755	SATB1 matrix attachment region binding protein
816	Cluster-3959.2693	2532	2476010	XP_003243665.1	2121	2.1e-235	PREDICTED: dual oxidase maturation factor 1 [Acyrthosiphon pisum]	XM_003243617.3	XM_003243617	2135	0	PREDICTED: Acyrthosiphon pisum dual oxidase maturation factor 1 (LOC100161886), transcript variant X1, mRNA	K17233	DUOXA1	dual oxidase maturation factor 1	http://www.genome.jp/dbget-bin/www_bget?ko:K17233	Q1HG43	364	4.3e-33	Dual oxidase maturation factor 1 OS=Homo sapiens OX=9606 GN=DUOXA1 PE=1 SV=1	PF10204	Dual oxidase maturation factor	GO:0015031	protein transport	--	--	GO:0016021//GO:0005789	integral component of membrane//endoplasmic reticulum membrane	KOG3921	Uncharacterized conserved protein
817	Cluster-3959.2692	1537	1168941	XP_001951312.1	827	1.4e-85	PREDICTED: alpha-protein kinase 1-like [Acyrthosiphon pisum]	XM_001951277.4	XM_001951277	1324	0	PREDICTED: Acyrthosiphon pisum alpha-protein kinase 1-like (LOC100159745), mRNA	--	--	--	--	--	--	--	--	PF07565	Band 3 cytoplasmic domain	GO:0006820	anion transport	GO:0008509	anion transmembrane transporter activity	GO:0016021	integral component of membrane	--	--
818	Cluster-3959.2691	4464	1167007	XP_001942741.1	3579	0	PREDICTED: NADH-ubiquinone oxidoreductase 75 kDa subunit, mitochondrial [Acyrthosiphon pisum]	XM_001942706.3	XM_001942706	2350	0	PREDICTED: Acyrthosiphon pisum NADH-ubiquinone oxidoreductase 75 kDa subunit, mitochondrial (LOC100162912), mRNA	K03934	NDUFS1	NADH dehydrogenase (ubiquinone) Fe-S protein 1	http://www.genome.jp/dbget-bin/www_bget?ko:K03934	P15690	2310	1.7e-258	NADH-ubiquinone oxidoreductase 75 kDa subunit, mitochondrial OS=Bos taurus OX=9913 GN=NDUFS1 PE=1 SV=1	PF09326//PF02063//PF00111//PF00384//PF00205//PF10588	NADH-ubiquinone oxidoreductase subunit G, C-terminal//MARCKS family//2Fe-2S iron-sulfur cluster binding domain//Molybdopterin oxidoreductase//Thiamine pyrophosphate enzyme, central domain//NADH-ubiquinone oxidoreductase-G iron-sulfur binding region	GO:0006118//GO:0055114	obsolete electron transport//oxidation-reduction process	GO:0016651//GO:0016491//GO:0000287//GO:0051536//GO:0030976//GO:0009055//GO:0005516	oxidoreductase activity, acting on NAD(P)H//oxidoreductase activity//magnesium ion binding//iron-sulfur cluster binding//thiamine pyrophosphate binding//electron carrier activity//calmodulin binding	--	--	KOG2282	NADH-ubiquinone oxidoreductase, NDUFS1/75 kDa subunit
819	Cluster-3959.2690	385	--	--	--	--	--	--	--	--	--	--	--	--	--	--	--	--	--	--	--	--	--	--	--	--	--	--	--	--
820	Cluster-3959.2697	2010	10797873	XP_022161988.1	1910	4.8e-211	alpha-N-acetylgalactosaminidase-like [Myzus persicae]	XM_001951942.4	XM_001951942	1193	0	PREDICTED: Acyrthosiphon pisum alpha-N-acetylgalactosaminidase (LOC100163871), mRNA	K01204	NAGA	alpha-N-acetylgalactosaminidase	http://www.genome.jp/dbget-bin/www_bget?ko:K01204	Q90744	994	3e-106	Alpha-N-acetylgalactosaminidase OS=Gallus gallus OX=9031 GN=NAGA PE=1 SV=1	PF16499//PF02065	Alpha galactosidase A//Melibiase	GO:0046486//GO:0001575//GO:0006012//GO:0005975	glycerolipid metabolic process//globoside metabolic process//galactose metabolic process//carbohydrate metabolic process	GO:0004553//GO:0004557	hydrolase activity, hydrolyzing O-glycosyl compounds//alpha-galactosidase activity	--	--	KOG2366	Alpha-D-galactosidase (melibiase)
821	Cluster-3959.2696	904	1596457	BAH70578.1	1145	1.1e-122	ACYPI003417 [Acyrthosiphon pisum]	NM_001162664.2	NM_001162664	795	0	Acyrthosiphon pisum proteasome subunit beta type-like (LOC100162255), mRNA	K02732	PSMB1	20S proteasome subunit beta 6	http://www.genome.jp/dbget-bin/www_bget?ko:K02732	P40304	634	7.5e-65	Proteasome subunit beta type-1 OS=Drosophila melanogaster OX=7227 GN=Prosbeta6 PE=2 SV=2	PF00227	Proteasome subunit	GO:0051603	proteolysis involved in cellular protein catabolic process	GO:0004298	threonine-type endopeptidase activity	GO:0005839	proteasome core complex	KOG0179	20S proteasome, regulatory subunit beta type PSMB1/PRE7
822	Cluster-3959.2695	371	--	--	--	--	--	XM_016804729.1	XM_016804729	39	4.25e-09	PREDICTED: Acyrthosiphon pisum beta-hexosaminidase subunit beta-like (LOC103309570), transcript variant X3, mRNA	--	--	--	--	--	--	--	--	--	--	--	--	--	--	--	--	--	--
823	Cluster-3959.2694	1147	--	--	--	--	--	--	--	--	--	--	--	--	--	--	--	--	--	--	--	--	--	--	--	--	--	--	--	--
824	Cluster-10675.0	342	10801684	XP_022166234.1	389	1.9e-35	uncharacterized protein LOC111030846 [Myzus persicae]	--	--	--	--	--	--	--	--	--	--	--	--	--	--	--	--	--	--	--	--	--	--	--
825	Cluster-3959.2867	3295	10811636	XP_022177210.1	4753	0	piezo-type mechanosensitive ion channel component-like isoform X6 [Myzus persicae]	XM_016804726.1	XM_016804726	2833	0	PREDICTED: Acyrthosiphon pisum piezo-type mechanosensitive ion channel component (LOC100161222), transcript variant X3, mRNA	--	--	--	--	M9MSG8	1648	7.2e-182	Piezo-type mechanosensitive ion channel component OS=Drosophila melanogaster OX=7227 GN=Piezo PE=2 SV=1	PF00067	Cytochrome P450	GO:0055114	oxidation-reduction process	GO:0005506//GO:0016705//GO:0020037	iron ion binding//oxidoreductase activity, acting on paired donors, with incorporation or reduction of molecular oxygen//heme binding	--	--	KOG1893	Uncharacterized conserved protein
826	Cluster-7902.0	380	10812522	XP_022178175.1	663	3.6e-67	sodium leak channel non-selective protein [Myzus persicae]	XM_008189286.2	XM_008189286	353	0	PREDICTED: Acyrthosiphon pisum sodium leak channel non-selective protein (LOC100159721), mRNA	--	--	--	--	Q8BXR5	323	3.6e-29	Sodium leak channel non-selective protein OS=Mus musculus OX=10090 GN=Nalcn PE=1 SV=2	PF00520	Ion transport protein	GO:0055085//GO:0006811	transmembrane transport//ion transport	GO:0005216	ion channel activity	GO:0016020	membrane	KOG2301	Voltage-gated Ca2+ channels, alpha1 subunits
827	Cluster-567.0	577	--	--	--	--	--	--	--	--	--	--	--	--	--	--	--	--	--	--	--	--	--	--	--	--	--	--	--	--
828	Cluster-12107.0	637	10799000	XP_022163243.1	880	4.2e-92	cationic amino acid transporter 2-like isoform X1 [Myzus persicae]	XM_001944846.4	XM_001944846	552	0	PREDICTED: Acyrthosiphon pisum cationic amino acid transporter 2 (LOC100162367), mRNA	K13864	SLC7A2, ATRC2	solute carrier family 7 (cationic amino acid transporter), member 2	http://www.genome.jp/dbget-bin/www_bget?ko:K13864	B3TP03	431	1.8e-41	Cationic amino acid transporter 2 OS=Gallus gallus OX=9031 GN=SLC7A2 PE=2 SV=1	PF13520//PF00324	Amino acid permease//Amino acid permease	GO:0055085//GO:0006810//GO:0006865//GO:0003333	transmembrane transport//transport//amino acid transport//amino acid transmembrane transport	GO:0015171	amino acid transmembrane transporter activity	GO:0016020	membrane	KOG1286	Amino acid transporters
829	Cluster-9849.1	2048	2478277	XP_001942954.2	287	7.8e-23	PREDICTED: exonuclease 1 [Acyrthosiphon pisum]	XM_001942865.4	XM_001942865	685	0	PREDICTED: Acyrthosiphon pisum gastrula zinc finger protein XlCGF57.1 (LOC100161597), transcript variant X2, mRNA	--	--	--	--	--	--	--	--	PF00321	Plant thionin	GO:0006952	defense response	--	--	--	--	--	--
830	Cluster-9597.0	346	--	--	--	--	--	XM_001943564.4	XM_001943564	216	1.59e-107	PREDICTED: Acyrthosiphon pisum dnaJ homolog subfamily C member 9 (LOC100158686), mRNA	--	--	--	--	--	--	--	--	--	--	--	--	--	--	--	--	--	--
831	Cluster-4847.0	1429	1594446	BAH71007.1	956	1.4e-100	ACYPI002097 [Acyrthosiphon pisum]	NM_001246050.1	AK340388	1016	0	Acyrthosiphon pisum gamma-glutamylcyclotransferase-like (LOC100160827), mRNA >dbj|AK340388.1| Acyrthosiphon pisum ACYPI002097 mRNA, clone: 584G15, complete cds, full-insert cDNA sequence based on the ESTs (5'-EST:FF319803, 3'-EST:FF320766)	K00682	GGCT	gamma-glutamylcyclotransferase	http://www.genome.jp/dbget-bin/www_bget?ko:K00682	Q32LE4	324	1e-28	Gamma-glutamylcyclotransferase OS=Bos taurus OX=9913 GN=GGCT PE=2 SV=1	--	--	--	--	--	--	--	--	KOG4059	Uncharacterized conserved protein
832	Cluster-1072.0	421	--	--	--	--	--	--	--	--	--	--	--	--	--	--	--	--	--	--	--	--	--	--	--	--	--	--	--	--
833	Cluster-6745.0	504	2478567	XP_001943480.2	826	6e-86	PREDICTED: citron Rho-interacting kinase [Acyrthosiphon pisum]	XM_001943445.4	XM_001943445	463	0	PREDICTED: Acyrthosiphon pisum citron Rho-interacting kinase (LOC100162068), mRNA	--	--	--	--	O14578	174	9.1e-12	Citron Rho-interacting kinase OS=Homo sapiens OX=9606 GN=CIT PE=1 SV=2	PF07989//PF00433	Centrosomin N-terminal motif 1//Protein kinase C terminal domain	GO:0016310//GO:0006468//GO:0009069	phosphorylation//protein phosphorylation//serine family amino acid metabolic process	GO:0004674//GO:0005524	protein serine/threonine kinase activity//ATP binding	GO:0005815	microtubule organizing center	KOG0612	Rho-associated, coiled-coil containing protein kinase
834	Cluster-3932.0	414	--	--	--	--	--	--	--	--	--	--	--	--	--	--	--	--	--	--	--	--	--	--	--	--	--	--	--	--
835	Cluster-4212.1	1097	10806978	XP_022172084.1	274	1.3e-21	uncharacterized protein LOC111034943 [Myzus persicae]	XM_003247596.3	XM_003247596	290	3.93e-148	PREDICTED: Acyrthosiphon pisum uncharacterized LOC100573979 (LOC100573979), mRNA	--	--	--	--	--	--	--	--	PF05887	Procyclic acidic repetitive protein (PARP)	--	--	--	--	GO:0016020	membrane	--	--
836	Cluster-9011.0	1142	1168875	XP_001949430.1	1195	2.2e-128	PREDICTED: tetratricopeptide repeat protein 1 [Acyrthosiphon pisum]	XM_001949395.4	XM_001949395	827	0	PREDICTED: Acyrthosiphon pisum tetratricopeptide repeat protein 1 (LOC100166997), mRNA	--	--	--	--	Q3ZBR5	427	9.5e-41	Tetratricopeptide repeat protein 1 OS=Bos taurus OX=9913 GN=TTC1 PE=2 SV=1	PF13414//PF00515//PF13371//PF13181//PF13374	TPR repeat//Tetratricopeptide repeat//Tetratricopeptide repeat//Tetratricopeptide repeat//Tetratricopeptide repeat	--	--	GO:0005515	protein binding	--	--	KOG4234	TPR repeat-containing protein
837	Cluster-10846.0	3028	--	--	--	--	--	--	--	--	--	--	--	--	--	--	--	--	--	--	--	--	--	--	--	--	--	--	--	--
838	Cluster-8218.0	464	--	--	--	--	--	--	--	--	--	--	--	--	--	--	--	--	--	--	--	--	--	--	--	--	--	--	--	--
839	Cluster-7987.0	1409	4412827	XP_008179504.1	969	4.4e-102	PREDICTED: CREB..ATF bZIP transcription factor-like isoform X1 [Acyrthosiphon pisum]	XM_008181282.2	XM_008181282	842	0	PREDICTED: Acyrthosiphon pisum CREB/ATF bZIP transcription factor-like (LOC100167053), transcript variant X1, mRNA	--	--	--	--	--	--	--	--	PF05529//PF09726//PF01105//PF00857//PF00170//PF10186	B-cell receptor-associated protein 31-like//Transmembrane protein//emp24/gp25L/p24 family/GOLD//Isochorismatase family//bZIP transcription factor//Vacuolar sorting 38 and autophagy-related subunit 14	GO:0010508//GO:0006355//GO:0006886//GO:0008152//GO:0006810	positive regulation of autophagy//regulation of transcription, DNA-templated//intracellular protein transport//metabolic process//transport	GO:0003824//GO:0043565//GO:0003700	catalytic activity//sequence-specific DNA binding//transcription factor activity, sequence-specific DNA binding	GO:0005783//GO:0016021//GO:0005667	endoplasmic reticulum//integral component of membrane//transcription factor complex	--	--
840	Cluster-4782.0	449	11956866	PRD39161.1	149	1.7e-07	sugE [Nephila clavipes]	CP013031.1	CP013031	449	0	Escherichia coli strain H1827/12, complete genome	--	--	--	--	Q1RBJ8	433	7.5e-42	Spermidine export protein MdtJ OS=Escherichia coli (strain UTI89 / UPEC) OX=364106 GN=mdtJ PE=3 SV=1	PF00893//PF00892//PF04142	Small Multidrug Resistance protein//EamA-like transporter family//Nucleotide-sugar transporter	GO:0008643	carbohydrate transport	GO:0005351	sugar:proton symporter activity	GO:0000139//GO:0016021//GO:0016020	Golgi membrane//integral component of membrane//membrane	--	--
841	Cluster-12342.1	1772	2474203	XP_003240351.1	507	2.1e-48	PREDICTED: uncharacterized protein LOC100573963 [Acyrthosiphon pisum]	XM_008187263.1	XM_008187263	436	0	PREDICTED: Acyrthosiphon pisum uncharacterized LOC103310101 (LOC103310101), mRNA	--	--	--	--	--	--	--	--	PF00165//PF09339//PF01381//PF02978//PF01498	Bacterial regulatory helix-turn-helix proteins, AraC family//IclR helix-turn-helix domain//Helix-turn-helix//Signal peptide binding domain//Transposase	GO:0006614//GO:0015074//GO:0006355//GO:0006313	SRP-dependent cotranslational protein targeting to membrane//DNA integration//regulation of transcription, DNA-templated//transposition, DNA-mediated	GO:0003700//GO:0043565//GO:0008312//GO:0003677	transcription factor activity, sequence-specific DNA binding//sequence-specific DNA binding//7S RNA binding//DNA binding	GO:0005667//GO:0048500	transcription factor complex//signal recognition particle	--	--
842	Cluster-2812.0	533	8338621	XP_016657599.1	599	1.3e-59	PREDICTED: acetyl-coenzyme A transporter 1 [Acyrthosiphon pisum]	XM_008181955.2	XM_008181955	423	0	PREDICTED: Acyrthosiphon pisum acetyl-coenzyme A transporter 1 (LOC100163065), transcript variant X6, mRNA	K03372	ACATN, SLC33A1	MFS transporter, PAT family, solute carrier family 33 (acetyl-CoA transportor), member 1	http://www.genome.jp/dbget-bin/www_bget?ko:K03372	Q99J27	290	3.4e-25	Acetyl-coenzyme A transporter 1 OS=Mus musculus OX=10090 GN=Slc33a1 PE=1 SV=1	PF13000	Acetyl-coenzyme A transporter 1	GO:0015876	acetyl-CoA transport	GO:0008521	acetyl-CoA transporter activity	GO:0016021	integral component of membrane	KOG3574	Acetyl-CoA transporter
843	Cluster-6741.0	1588	1168442	XP_001943884.1	2337	1.2e-260	PREDICTED: proline-, glutamic acid- and leucine-rich protein 1 [Acyrthosiphon pisum]	XM_001943849.4	XM_001943849	1423	0	PREDICTED: Acyrthosiphon pisum proline-, glutamic acid- and leucine-rich protein 1 (LOC100163808), mRNA	--	--	--	--	Q9DBD5	179	7.6e-12	Proline-, glutamic acid- and leucine-rich protein 1 OS=Mus musculus OX=10090 GN=Pelp1 PE=1 SV=2	--	--	--	--	--	--	--	--	--	--
844	Cluster-11224.0	362	--	--	--	--	--	--	--	--	--	--	--	--	--	--	--	--	--	--	--	--	--	--	--	--	--	--	--	--
845	Cluster-9181.0	8609	2474341	XP_001946819.2	7329	0	PREDICTED: ankyrin repeat domain-containing protein 17 isoform X1 [Acyrthosiphon pisum]	XM_001946784.4	XM_001946784	8042	0	PREDICTED: Acyrthosiphon pisum ankyrin repeat and KH domain-containing protein 1 (LOC100167340), transcript variant X1, mRNA	K16726	ANKRD17, MASK	ankyrin repeat domain-containing protein 17	http://www.genome.jp/dbget-bin/www_bget?ko:K16726	Q99NH0	2110	5e-235	Ankyrin repeat domain-containing protein 17 OS=Mus musculus OX=10090 GN=Ankrd17 PE=1 SV=2	PF00023//PF07650//PF13606//PF13014//PF00013//PF09026	Ankyrin repeat//KH domain//Ankyrin repeat//KH domain//KH domain//Centromere protein B dimerisation domain	GO:0006355	regulation of transcription, DNA-templated	GO:0003723//GO:0003682//GO:0005515//GO:0003677	RNA binding//chromatin binding//protein binding//DNA binding	GO:0000785//GO:0000775//GO:0005634	chromatin//chromosome, centromeric region//nucleus	--	--
[truncated: 17,185 more rows]

## Sheet: Table S2
	Table S2. List of secretory genes and gene products predicted from total unigenes
[truncated: 706 more rows]
