# Supplementary material for: A Comprehensive Transcriptomic and Proteomics Analysis of Candidate Secretory Proteins in Rose Grain Aphid, Metopolophium dirhodum (Walker)
Source: Preprints.org preprint supplement (doi:10.20944/preprints202408.1804.v1), 2024-08-26
Supplement: Supplementary file 3 [file Supplementary file of salivary proteins.xlsx]

## Sheet: Sample one
S/N	Protein IDs	Majority protein IDs	Peptide counts (all)	Peptide counts (razor+unique)	Peptide counts (unique)	Fasta headers	Number of proteins	Peptides	Razor + unique peptides	Unique peptides	Peptides MDE_SAM	Razor + unique peptides MDE_SAM	Unique peptides MDE_SAM	Sequence coverage [%]	Unique + razor sequence coverage [%]	Unique sequence coverage [%]	Mol. weight [kDa]	Sequence length	Sequence lengths	Fraction average	Fraction 1	Q-value	Score	Sequence coverage MDE_SAM [%]	Intensity	Intensity MDE_SAM	iBAQ peptides	iBAQ	iBAQ MDE_SAM	MS/MS count	Peptide sequences	Only identified by site	Reverse	Potential contaminant	id	Peptide IDs	Peptide is razor	Mod. peptide IDs	Evidence IDs	MS/MS IDs	Best MS/MS	Oxidation (M) site IDs	Oxidation (M) site positions	Taxonomy IDs
1	A0A6G0YHT2;Q201U9;A0A6G0TXC2;Q5XUC4;A0A059XKE4;A0A2H8TNU9;X2FB37;A0A6G0Z0M7;A0A2H8TVL9;T1UMS9;A0A3G4R8Q5;A0A7T7ILT3;A0A8R1XH48;A0A9P0J4J3;Q5XUA4;A0A9P0NKG9;A0A8R2A9Y3;A0A6G0YG80;A0A9P0J562;A0A2H8TKC1;C4WRP2;A0A6G0YKS0;A0A6G0TYG6;A0A6G0U5M5;A0A9P0J4B6;A0A6G0YG52;A0A2R4SUF9;A0A8R2NLE5;A0A2S2PCQ5;A0A2S2P427;Q6PTC1;B6RS47;Q6PTC2;V5KS26;A0A2H8TR12;A0A2S2NVK3;A0A2S2NH93	A0A6G0YHT2;Q201U9;A0A6G0TXC2;Q5XUC4;A0A059XKE4;A0A2H8TNU9;X2FB37;A0A6G0Z0M7;A0A2H8TVL9;T1UMS9;A0A3G4R8Q5;A0A7T7ILT3;A0A8R1XH48;A0A9P0J4J3;Q5XUA4;A0A9P0NKG9;A0A8R2A9Y3;A0A6G0YG80;A0A9P0J562;A0A2H8TKC1;C4WRP2;A0A6G0YKS0;A0A6G0TYG6;A0A6G0U5M5;A0A9P0J4B6;A0A6G0YG52;A0A2R4SUF9	8;8;8;8;8;7;7;6;6;6;6;6;6;6;6;5;5;5;5;5;5;5;5;5;5;4;4;3;3;3;3;2;2;2;2;2;1	8;8;8;8;8;7;7;6;6;6;6;6;6;6;6;5;5;5;5;5;5;5;5;5;5;4;4;3;3;3;3;2;2;2;2;2;1	8;8;8;8;8;7;7;6;6;6;6;6;6;6;6;5;5;5;5;5;5;5;5;5;5;4;4;3;3;3;3;2;2;2;2;2;1	tr|A0A6G0YHT2|A0A6G0YHT2_APHCR Actin related protein 1 isoform X1 OS=Aphis craccivora OX=307492 GN=FWK35_00011491 PE=3 SV=1;tr|Q201U9|Q201U9_ACYPI Putative actin OS=Acyrthosiphon pisum OX=7029 GN=100145822 PE=2 SV=1;tr|A0A6G0TXC2|A0A6G0TXC2_APHGL Beta-acti	37	8	8	8	8	8	8	28.2	28.2	28.2	41.821	376	376;376;376;376;376;331;375;376;376;376;376;376;376;376;376;376;376;376;376;403;376;407;376;332;276;332;241;115;287;234;149;199;149;145;123;116;99	1	11	0	110.4	28.2	84325000	84325000	20	3113100	3113100	9	AVFPSIVGRPR;DLYANTVLSGGTTMYPGIADR;DSYVGDEAQSK;EITALAPSTMK;IIAPPER;IWHHTFYNELR;SYELPDGQVITIGNER;VAPEEHPVLLTEAPLNPK				0	24;30;32;41;95;111;249;279	True;True;True;True;True;True;True;True	24;30;32;43;44;99;117;266;300	28;29;36;38;55;56;131;167;387;388;427	30;31;45;47;89;90;200;246;565;566;619	31;45;47;89;200;246;566;619	0;1	306;326	-1;-1;-1;-1;-1;-1;-1;-1;-1;-1;-1;-1;-1;-1;-1;-1;-1;-1;-1;-1;-1;-1;-1;-1;-1;-1;-1;-1;-1;-1;-1;-1;-1;-1;-1;-1;-1
2	A0A8R2AZJ4;A0A2H8TF67;A0A8T9JB46;A0A6G0Z8A3;A0A164TER7;A0A8R1W075;A0A2U8UBT3;A0A6G0TX89;X2GLG0	A0A8R2AZJ4;A0A2H8TF67;A0A8T9JB46;A0A6G0Z8A3;A0A164TER7;A0A8R1W075;A0A2U8UBT3;A0A6G0TX89;X2GLG0	2;2;2;2;2;2;2;2;1	2;2;2;2;2;2;2;2;1	2;2;2;2;2;2;2;2;1	tr|A0A8R2AZJ4|A0A8R2AZJ4_ACYPI Heat shock protein 83 OS=Acyrthosiphon pisum OX=7029 GN=100168702 PE=3 SV=1;tr|A0A2H8TF67|A0A2H8TF67_9HEMI Heat shock protein 83 OS=Melanaphis sacchari OX=742174 GN=Hsp83_2 PE=3 SV=1;tr|A0A8T9JB46|A0A8T9JB46_APHGO Heat shock	9	2	2	2	2	2	2	3.6	3.6	3.6	83.094	722	722;726;727;727;727;728;728;851;310	1	2	0	12.032	3.6	3230100	3230100	36	89726	89726	2	ADLVNNLGTIAK;GVVDSEDLPLNISR				1	1;82	True;True	1;85	1;117	1;183	1;183			-1;-1;-1;-1;-1;-1;-1;-1;-1
3	A0A2S2PGI6;A0A8R2D1N9;A0A8R2B3V1;A0A6G0TYU9;Q9U5N2;A0A9P0NPT4;A0A2S2PMD5;A0A172JCK5;A0A2H8TY06	A0A2S2PGI6;A0A8R2D1N9;A0A8R2B3V1;A0A6G0TYU9;Q9U5N2;A0A9P0NPT4;A0A2S2PMD5;A0A172JCK5;A0A2H8TY06	1;1;1;1;1;1;1;1;1	1;1;1;1;1;1;1;1;1	1;1;1;1;1;1;1;1;1	tr|A0A2S2PGI6|A0A2S2PGI6_SCHGA Heat shock protein (Fragment) OS=Schizaphis graminum OX=13262 GN=Hsp60_1 PE=3 SV=1;tr|A0A8R2D1N9|A0A8R2D1N9_ACYPI Uncharacterized protein OS=Acyrthosiphon pisum OX=7029 PE=3 SV=1;tr|A0A8R2B3V1|A0A8R2B3V1_ACYPI Uncharacterized	9	1	1	1	1	1	1	8.1	8.1	8.1	22.383	209	209;572;572;572;573;575;575;575;625	1	1	0	7.7049	8.1	3716600	3716600	16	232290	232290	1	AAVEEGIVPGGGTALIR				2	0	TRUE	0	0	0	0			-1;-1;-1;-1;-1;-1;-1;-1;-1
4	A0A6G0YEX1;A0A2S2P152;A0A2H8TFK5;Q1ZZQ8;A0A9P0JI63;A0A8R1TCC0;A0A6G0TU56	A0A6G0YEX1;A0A2S2P152;A0A2H8TFK5;Q1ZZQ8;A0A9P0JI63;A0A8R1TCC0;A0A6G0TU56	1;1;1;1;1;1;1	1;1;1;1;1;1;1	1;1;1;1;1;1;1	tr|A0A6G0YEX1|A0A6G0YEX1_APHCR ATP synthase subunit beta, mitochondrial (Fragment) OS=Aphis craccivora OX=307492 GN=FWK35_00015894 PE=3 SV=1;tr|A0A2S2P152|A0A2S2P152_SCHGA ATP synthase subunit beta (Fragment) OS=Schizaphis graminum OX=13262 GN=g.46832 PE=3	7	1	1	1	1	1	1	5.8	5.8	5.8	21.538	206	206;332;359;521;521;521;521	1	1	0	7.6279	5.8	5113200	5113200	15	340880	340880	1	TIAMDGTEGLVR				3	258	TRUE	275	398	578	578	2	107	-1;-1;-1;-1;-1;-1;-1
5	A0A2H8TGI4	A0A2H8TGI4	1	1	1	tr|A0A2H8TGI4|A0A2H8TGI4_9HEMI 60S acidic ribosomal protein P0 (Fragment) OS=Melanaphis sacchari OX=742174 GN=rpp0 PE=3 SV=1	1	1	1	1	1	1	1	4.5	4.5	4.5	29.202	265	265	1	1	0	6.9975	4.5	584910	584910	10	58491	58491	1	TSFFQALGVPTK				4	270	TRUE	289	415	604	604			-1
6	A0A6G0UBA1;A0A6G0Z0A6;A0A2S2PN25;A0A8R2A896;A0A2H8THX5;A0A8R2FFI7;A0A9E8M6A1;A0A172JCK2;A0A8T9JBN9;A0A6G0YD34;A0A6G0Z7E6;A0A6G0ZAK1;A0A8R2A4J9;A0A6G0U8T9;A0A9E8M4V9;A0A9P0NCU7;A0A172JCK1;A0A9P0JKM7;A0A9E8M4K6;A0A6G0U265;A0A6G0TDW2;A0A6G0SYX0;W5RXA8;A0A6G0TUL7;A0A9E8M6J9;A0A9P0ISY2;A0A9P0JFG6;A0A2S2NEI1;A0A9P0IP17;A0A6G0VHF6;A0A2U8UBS6;A0A2S2NV78;T1YSQ6;A0A6G0YSG3;A0A8R2A5A3;A0A286LPK6;A0A8R2B721;…	A0A6G0UBA1;A0A6G0Z0A6;A0A2S2PN25;A0A8R2A896;A0A2H8THX5;A0A8R2FFI7;A0A9E8M6A1;A0A172JCK2;A0A8T9JBN9;A0A6G0YD34;A0A6G0Z7E6;A0A6G0ZAK1;A0A8R2A4J9;A0A6G0U8T9;A0A9E8M4V9;A0A9P0NCU7;A0A172JCK1;A0A9P0JKM7;A0A9E8M4K6;A0A6G0U265;A0A6G0TDW2;A0A6G0SYX0;W5RXA8;A0A6G0TUL7;A0A9E8M6J9;A0A9P0ISY2;A0A9P0JFG6;A0A2S2NEI1;A0A9P0IP17;A0A6G0VHF6	3;3;3;3;3;3;2;2;2;2;2;2;2;2;2;2;2;2;2;2;2;2;2;2;2;2;2;2;2;2;1;1;1;1;1;1;1;1;1;1;1;1;1;1;1;1;1;1;1;1;1;1;1;1;1;1;1;1;1;1	3;3;3;3;3;3;2;2;2;2;2;2;2;2;2;2;2;2;2;2;2;2;2;2;2;2;2;2;2;2;1;1;1;1;1;1;1;1;1;1;1;1;1;1;1;1;1;1;1;1;1;1;1;1;1;1;1;1;1;1	1;1;1;1;1;1;1;1;1;1;1;1;1;1;1;1;1;1;1;1;1;1;1;1;1;1;1;1;1;1;0;0;0;0;0;0;0;0;0;0;0;0;0;0;1;0;0;0;0;0;0;0;0;0;1;0;1;0;1;0	tr|A0A6G0UBA1|A0A6G0UBA1_APHGL Heat shock protein 70 OS=Aphis glycines OX=307491 GN=AGLY_001145 PE=3 SV=1;tr|A0A6G0Z0A6|A0A6G0Z0A6_APHCR Heat shock protein 68-like OS=Aphis craccivora OX=307492 GN=FWK35_00011329 PE=3 SV=1;tr|A0A2S2PN25|A0A2S2PN25_SCHGA Hea	60	3	3	1	3	3	1	6.3	6.3	2	69.598	639	639;637;210;641;256;641;637;637;637;637;637;637;637;637;637;637;641;643;643;644;637;637;637;637;637;637;636;210;637;279;654;661;654;654;661;661;659;660;654;659;659;659;659;669;114;653;653;653;652;653;166;621;613;582;533;499;257;213;168;689	1	4	0	22.898	6.3	5649500	5649500	32	176550	176550	5	IINEPTAAALAYGLDK;TTPSYVAFTDTER;VEIIANDQGNR				5	96;275;284	True;True;True	100;296;306	132;133;423;444	201;202;614;615;651	201;614;651			-1;-1;-1;-1;-1;-1;-1;-1;-1;-1;-1;-1;-1;-1;-1;-1;-1;-1;-1;-1;-1;-1;-1;-1;-1;-1;-1;-1;-1;-1;-1;-1;-1;-1;-1;-1;-1;-1;-1;-1;-1;-1;-1;-1;-1;-1;-1;-1;-1;-1;-1;-1;-1;-1;-1;-1;-1;-1;-1;-1
7	A0A2S2NHS9;C4WSK5;A0A6G0YYG1;A0A6G0UAY1;A0A6G0U671;A0A8R2JTS8;A0A2H8TYC5;A0A2H8TJA0;A0A9P0NB40;A0A6G0Y760;A0A2S2NJX2;A0A6G0W920;A0A6G0XIE4;X1XQT3;C4WW27;A0A8R1W6T8;A0A6G0ZCD3	A0A2S2NHS9;C4WSK5;A0A6G0YYG1;A0A6G0UAY1;A0A6G0U671;A0A8R2JTS8;A0A2H8TYC5;A0A2H8TJA0;A0A9P0NB40;A0A6G0Y760;A0A2S2NJX2;A0A6G0W920;A0A6G0XIE4;X1XQT3;C4WW27;A0A8R1W6T8;A0A6G0ZCD3	1;1;1;1;1;1;1;1;1;1;1;1;1;1;1;1;1	1;1;1;1;1;1;1;1;1;1;1;1;1;1;1;1;1	1;1;1;1;1;1;1;1;1;1;1;1;1;1;1;1;1	tr|A0A2S2NHS9|A0A2S2NHS9_SCHGA Histone H2A (Fragment) OS=Schizaphis graminum OX=13262 GN=H2A_0 PE=3 SV=1;tr|C4WSK5|C4WSK5_ACYPI Histone H2A OS=Acyrthosiphon pisum OX=7029 GN=ACYPI005340 PE=2 SV=1;tr|A0A6G0YYG1|A0A6G0YYG1_APHCR Histone H2A (Fragment) OS=Aph	17	1	1	1	1	1	1	7.9	7.9	7.9	12.168	114	114;128;258;255;235;149;134;128;128;124;126;126;126;125;125;124;260	1	1	0	8.4544	7.9	25632000	25632000	5	5126400	5126400	1	AGLQFPVGR				6	8	TRUE	8	9	10	10			-1;-1;-1;-1;-1;-1;-1;-1;-1;-1;-1;-1;-1;-1;-1;-1;-1
8	A0A6G0ZHT7;D7RA98;A0A9P0NIC5;A0A6G0TX24;A0A2H8TK23;A0A6G0ZEH9;A0A9P0J0B8;A0A9P0NQK1;A0A2H8TJB4;A0A8R2A6U1;A0A2S2NRM6;A0A8R1W0G5;A0A6G0TMJ5;A0A6G0YWA0;A0A8R1ZZR9;A0A8R1W1E0;A0A2H8TVH5;A0A9P0JC40;A0A8R2BB00;A0A2S2P542;A0A6G0YQR9;A0A6G0ZDZ7;A0A2S2NPC8;A0A2S2PQK0;A0A2S2PCP3;A0A2S2P1J5;A0A2S2NFV8;A0A2H8TVH0;A0A6G0YG68;A0A2S2NVY4;A0A6G0TV01;A0A6G0TQM1;A0A9P0NMS4;A0A8R2A6B4;A0A6G0U366;A0A9P0J767;CON__EN…	A0A6G0ZHT7;D7RA98;A0A9P0NIC5;A0A6G0TX24;A0A2H8TK23;A0A6G0ZEH9;A0A9P0J0B8;A0A9P0NQK1;A0A2H8TJB4;A0A8R2A6U1;A0A2S2NRM6;A0A8R1W0G5;A0A6G0TMJ5;A0A6G0YWA0;A0A8R1ZZR9	3;3;3;3;3;2;2;2;2;2;2;2;2;2;2;1;1;1;1;1;1;1;1;1;1;1;1;1;1;1;1;1;1;1;1;1;1	3;3;3;3;3;2;2;2;2;2;2;2;2;2;2;1;1;1;1;1;1;1;1;1;1;1;1;1;1;1;1;1;1;1;1;1;1	3;3;3;3;3;2;2;2;2;2;2;2;2;2;2;1;1;1;1;1;1;1;1;1;1;1;1;1;1;1;1;1;1;1;1;1;1	tr|A0A6G0ZHT7|A0A6G0ZHT7_APHCR Tubulin beta chain OS=Aphis craccivora OX=307492 GN=FWK35_00001229 PE=3 SV=1;tr|D7RA98|D7RA98_ACYPI Tubulin beta chain OS=Acyrthosiphon pisum OX=7029 GN=Tub1 PE=2 SV=1;tr|A0A9P0NIC5|A0A9P0NIC5_APHGO Tubulin beta chain OS=Aphi	37	3	3	3	3	3	3	8.7	8.7	8.7	50.23	447	447;447;447;447;447;445;451;445;451;392;375;454;459;484;445;445;453;453;453;169;445;412;184;197;212;284;292;372;437;175;440;444;444;444;445;445;536	1	3	0	17.144	8.7	901300	901300	20	45065	45065	3	AILVDLEPGTMDSVR;LAVNMVPFPR;NSSYFVEWIPNNVK				7	9;126;176	True;True;True	9;133;190	10;186;283	11;268;423	11;268;423	3	257	-1;-1;-1;-1;-1;-1;-1;-1;-1;-1;-1;-1;-1;-1;-1;-1;-1;-1;-1;-1;-1;-1;-1;-1;-1;-1;-1;-1;-1;-1;-1;-1;-1;-1;-1;-1;-1
9	A0A2H8TLW6;A0A6G0Y5U5;A0A9P0NIK8;A0A8R1W5I3;A0A6G0T1M1;A0A2S2NCE7	A0A2H8TLW6;A0A6G0Y5U5;A0A9P0NIK8;A0A8R1W5I3;A0A6G0T1M1;A0A2S2NCE7	1;1;1;1;1;1	1;1;1;1;1;1	1;1;1;1;1;1	tr|A0A2H8TLW6|A0A2H8TLW6_9HEMI Tubulin alpha chain OS=Melanaphis sacchari OX=742174 GN=Tuba1c PE=3 SV=1;tr|A0A6G0Y5U5|A0A6G0Y5U5_APHCR Tubulin alpha chain (Fragment) OS=Aphis craccivora OX=307492 GN=FWK35_00036695 PE=3 SV=1;tr|A0A9P0NIK8|A0A9P0NIK8_APHGO T	6	1	1	1	1	1	1	4.5	4.5	4.5	49.804	448	448;449;450;450;450;452	1	1	0	16.702	4.5	291450	291450	21	13879	13879	1	TIGGGDDSFNTFFSETGAGK				8	259	TRUE	276	399	579	579			-1;-1;-1;-1;-1;-1
10	A0A2S2NYR8;A0A9P0J701;A0A2S2N932;Q5XUA0;C4WSM1;A0A6G0U264;A0A8R2FCF7;A0A6G0YZ73;A0A2H8TNA6;A0A6G0YUL2;A0A8R1W4P9;A0A2H8TYJ2;A0A2S2NQP7;A0A6G0T6Z6;A0A2H8THT2;A0A6G0SYW3;A0A6G0Z138;A0A8R2B707;A0A9P0IQE8;A0A2S2P5I0;A0A9P0ILS7	A0A2S2NYR8;A0A9P0J701;A0A2S2N932;Q5XUA0;C4WSM1;A0A6G0U264;A0A8R2FCF7;A0A6G0YZ73;A0A2H8TNA6;A0A6G0YUL2;A0A8R1W4P9;A0A2H8TYJ2;A0A2S2NQP7;A0A6G0T6Z6;A0A2H8THT2;A0A6G0SYW3;A0A6G0Z138;A0A8R2B707;A0A9P0IQE8;A0A2S2P5I0;A0A9P0ILS7	2;2;2;2;2;2;2;2;2;1;1;1;1;1;1;1;1;1;1;1;1	2;2;2;2;2;2;2;2;2;1;1;1;1;1;1;1;1;1;1;1;1	2;2;2;2;2;2;2;2;2;1;1;1;1;1;1;1;1;1;1;1;1	tr|A0A2S2NYR8|A0A2S2NYR8_SCHGA Peroxiredoxin 1 OS=Schizaphis graminum OX=13262 GN=Jafrac1_0 PE=4 SV=1;tr|A0A9P0J701|A0A9P0J701_APHGO Genome assembly, chromosome: 3 OS=Aphis gossypii OX=80765 GN=APHIGO_LOCUS7915 PE=3 SV=1;tr|A0A2S2N932|A0A2S2N932_SCHGA Pero	21	2	2	2	2	2	2	11.2	11.2	11.2	18.335	161	161;193;175;193;193;302;193;193;193;209;239;239;239;239;245;245;245;245;245;246;239	1	2	0	11.675	11.2	4569100	4569100	10	456910	456910	2	QITINDLPVGR;SVDETLR				9	189;246	True;True	203;263	296;384	439;562	439;562			-1;-1;-1;-1;-1;-1;-1;-1;-1;-1;-1;-1;-1;-1;-1;-1;-1;-1;-1;-1;-1
11	A0A9P0J6A7;A0A6G0ZP88;A0A2H8TR41;A0A6G0TAY3	A0A9P0J6A7;A0A6G0ZP88;A0A2H8TR41;A0A6G0TAY3	1;1;1;1	1;1;1;1	1;1;1;1	tr|A0A9P0J6A7|A0A9P0J6A7_APHGO 6-phosphogluconate dehydrogenase, decarboxylating OS=Aphis gossypii OX=80765 GN=APHIGO_LOCUS7428 PE=3 SV=1;tr|A0A6G0ZP88|A0A6G0ZP88_APHCR 6-phosphogluconate dehydrogenase, decarboxylating OS=Aphis craccivora OX=307492 GN=FWK3	4	1	1	1	1	1	1	6.4	6.4	6.4	29.475	265	265;482;482;483	1	1	0	13.144	6.4	3805100	3805100	14	271790	271790	1	GLLFVGSGVSGGEEGAR				10	70	TRUE	73	102	160	160			-1;-1;-1;-1
12	A0A2H8TTF1;A0A8R2A3S2;A0A9P0JFV1;A0A8R2B594;A0A8R2NTG2;A0A6G0YK73;A0A6G0U0K8;A8CF31;A8CF29;E9K862;A8CF26;A8CF22;A8CF19;B6CNZ7;A8CF11;B6CP29;B6CP00;B6CNZ9;B6CP26;E9K863;B6CP27;B6CNZ1;E9K864;B6CP25;B6CP24;B6CP23;A0A7U0F497;B6CP21;B6CP20;B6CNZ0;B6CNZ4;B6CNZ2;A0A7U0IKY6;H9ZYH0;H9ZYG4;H9ZYG1;H9ZYH3;I2BEW8;H9ZYG5;H9ZYF9;A0A7U0IJX0;A0A7U0IJD9;A0A7U0IKL6;A0A7U0F439;B6CNZ3;A0A7U0IKP1;A0A7U0IJZ5;A0A7U0IJS5…	A0A2H8TTF1;A0A8R2A3S2;A0A9P0JFV1;A0A8R2B594;A0A8R2NTG2;A0A6G0YK73;A0A6G0U0K8;A8CF31;A8CF29;E9K862;A8CF26;A8CF22;A8CF19;B6CNZ7;A8CF11;B6CP29;B6CP00;B6CNZ9;B6CP26;E9K863;B6CP27;B6CNZ1;E9K864;B6CP25;B6CP24;B6CP23;A0A7U0F497;B6CP21;B6CP20;B6CNZ0;B6CNZ4;B6CNZ2;A0A7U0IKY6;H9ZYH0;H9ZYG4;H9ZYG1;H9ZYH3;I2BEW8;H9ZYG5;H9ZYF9;A0A7U0IJX0;A0A7U0IJD9;A0A7U0IKL6;A0A7U0F439;B6CNZ3;A0A7U0IKP1;A0A7U0IJZ5;A0A7U0IJS5…	3;3;3;3;3;3;3;2;2;2;2;2;2;2;2;2;2;2;2;2;2;2;2;2;2;2;2;2;2;2;2;2;2;2;2;2;2;2;2;2;2;2;2;2;2;2;2;2;2;2;2;2;2;2;2;2;2;2;2;2;2;2;2;2;2;2;2;2;2;2;2;2;2;2;2;2;2;2;2;2;2;2;2;2;2;2;2;2;2;2;2;2;2;2;2;2;2;2;2;2;2;2;2;2;2;2;2;2;2;2;2;2;2;2;2;2;2;2;2;2;2;2;2;2;2;2;2;2;2;2;2;2;2;2;2;2;2;2;2;2;2;2;2;2;2;2;2;2;2;2;2;2;2;2;2;2;2;2;2;2;2;2;2;2;2;2;2;2;2;2;2;2;2;2;2;2;2;2;2;2;2;2;2;2;2;2;2;2;2;2;2;2;2;2;2;2;2;2;2;2…	3;3;3;3;3;3;3;2;2;2;2;2;2;2;2;2;2;2;2;2;2;2;2;2;2;2;2;2;2;2;2;2;2;2;2;2;2;2;2;2;2;2;2;2;2;2;2;2;2;2;2;2;2;2;2;2;2;2;2;2;2;2;2;2;2;2;2;2;2;2;2;2;2;2;2;2;2;2;2;2;2;2;2;2;2;2;2;2;2;2;2;2;2;2;2;2;2;2;2;2;2;2;2;2;2;2;2;2;2;2;2;2;2;2;2;2;2;2;2;2;2;2;2;2;2;2;2;2;2;2;2;2;2;2;2;2;2;2;2;2;2;2;2;2;2;2;2;2;2;2;2;2;2;2;2;2;2;2;2;2;2;2;2;2;2;2;2;2;2;2;2;2;2;2;2;2;2;2;2;2;2;2;2;2;2;2;2;2;2;2;2;2;2;2;2;2;2;2;2;2…	3;3;3;3;3;3;3;2;2;2;2;2;2;2;2;2;2;2;2;2;2;2;2;2;2;2;2;2;2;2;2;2;2;2;2;2;2;2;2;2;2;2;2;2;2;2;2;2;2;2;2;2;2;2;2;2;2;2;2;2;2;2;2;2;2;2;2;2;2;2;2;2;2;2;2;2;2;2;2;2;2;2;2;2;2;2;2;2;2;2;2;2;2;2;2;2;2;2;2;2;2;2;2;2;2;2;2;2;2;2;2;2;2;2;2;2;2;2;2;2;2;2;2;2;2;2;2;2;2;2;2;2;2;2;2;2;2;2;2;2;2;2;2;2;2;2;2;2;2;2;2;2;2;2;2;2;2;2;2;2;2;2;2;2;2;2;2;2;2;2;2;2;2;2;2;2;2;2;2;2;2;2;2;2;2;2;2;2;2;2;2;2;2;2;2;2;2;2;2;2…	tr|A0A2H8TTF1|A0A2H8TTF1_9HEMI Elongation factor 1-alpha OS=Melanaphis sacchari OX=742174 GN=EF1A_0 PE=3 SV=1;tr|A0A8R2A3S2|A0A8R2A3S2_ACYPI Elongation factor 1-alpha OS=Acyrthosiphon pisum OX=7029 GN=100163340 PE=3 SV=1;tr|A0A9P0JFV1|A0A9P0JFV1_APHGO Elon	421	3	3	3	3	3	3	6.3	6.3	6.3	50.276	462	462;462;462;462;287;462;462;267;267;267;267;267;267;267;267;267;267;267;267;267;267;267;267;267;267;267;259;267;267;267;267;267;270;271;271;271;271;271;271;271;270;270;270;269;267;269;269;269;268;268;268;267;267;267;267;267;267;267;262;264;264;264;263;263;263;263;262;262;262;262;267;262;261;261;261;261;260;259;259;259;267;265;265;265;265;271;267;267;267;267;267;267;267;267;267;267;267;267;267;267…	1	3	0	21.983	6.3	50061000	50061000	23	2176600	2176600	4	IGGIGTVPVGR;LPLQDVYK;STTTGHLIYK				11	94;149;245	True;True;True	98;158;262	130;225;383	199;321;322;561	199;322;561			-1;-1;-1;-1;-1;-1;-1;-1;-1;-1;-1;-1;-1;-1;-1;-1;-1;-1;-1;-1;-1;-1;-1;-1;-1;-1;-1;-1;-1;-1;-1;-1;-1;-1;-1;-1;-1;-1;-1;-1;-1;-1;-1;-1;-1;-1;-1;-1;-1;-1;-1;-1;-1;-1;-1;-1;-1;-1;-1;-1;-1;-1;-1;-1;-1;-1;-1;-1;-1;-1;-1;-1;-1;-1;-1;-1;-1;-1;-1;-1;-1;-1;-1;-1;-1;-1;-1;-1;-1;-1;-1;-1;-1;-1;-1;-1;-1;-1;-1;-1;-1;-1;-1;-1;-1;-1;-1;-1;-1;-1;-1;-1;-1;-1;-1;-1;-1;-1;-1;-1;-1;-1;-1;-1;-1;-1;-1;-1;-1;-1;-1;-1;-1;…
13	C4WWE5;A0A9P0JBM3;A0A8R2A650;A0A6G0YDR7;A0A6G0TVN9;A0A2S2PHK3;A0A2H8TYZ2	C4WWE5;A0A9P0JBM3;A0A8R2A650;A0A6G0YDR7;A0A6G0TVN9;A0A2S2PHK3;A0A2H8TYZ2	1;1;1;1;1;1;1	1;1;1;1;1;1;1	1;1;1;1;1;1;1	tr|C4WWE5|C4WWE5_ACYPI ACYPI010077 protein OS=Acyrthosiphon pisum OX=7029 GN=ACYPI010077 PE=2 SV=1;tr|A0A9P0JBM3|A0A9P0JBM3_APHGO Vacuolar proton pump subunit B OS=Aphis gossypii OX=80765 GN=APHIGO_LOCUS10191 PE=3 SV=1;tr|A0A8R2A650|A0A8R2A650_ACYPI Vacuol	7	1	1	1	1	1	1	6.6	6.6	6.6	24.097	212	212;496;496;496;496;496;496	1	1	0	6.2143	6.6	255950	255950	9	28439	28439	1	QIYPPINVLPSLSR				12	190	TRUE	204	297	440	440			-1;-1;-1;-1;-1;-1;-1
14	A0A2S2N8A9;A0A6G0Y567;J9K3R4;A0A6G0UA10;A0A6G0U874;A0A6G0U6N9;A0A6G0U7B9;A0A8R2AH10;A0A6G0VL82;A0A8R2A8T7;A0A6G0ZC99;J9K142;A0A2S2PAL2;A0A6G0VS41;A0A6G0XIJ0;A0A6G0VZK4;A0A2H8TX83;A0A2S2NSQ0;A0A6G0ZLQ5;A0A6G0YKL5;A0A2S2NUF7;A0A6G0YS26;A0A6G0UBH8	A0A2S2N8A9;A0A6G0Y567;J9K3R4;A0A6G0UA10;A0A6G0U874;A0A6G0U6N9;A0A6G0U7B9;A0A8R2AH10;A0A6G0VL82;A0A8R2A8T7;A0A6G0ZC99;J9K142;A0A2S2PAL2;A0A6G0VS41;A0A6G0XIJ0;A0A6G0VZK4;A0A2H8TX83;A0A2S2NSQ0;A0A6G0ZLQ5;A0A6G0YKL5;A0A2S2NUF7;A0A6G0YS26;A0A6G0UBH8	2;1;1;1;1;1;1;1;1;1;1;1;1;1;1;1;1;1;1;1;1;1;1	2;1;1;1;1;1;1;1;1;1;1;1;1;1;1;1;1;1;1;1;1;1;1	2;1;1;1;1;1;1;1;1;1;1;1;1;1;1;1;1;1;1;1;1;1;1	tr|A0A2S2N8A9|A0A2S2N8A9_SCHGA Histone H2B OS=Schizaphis graminum OX=13262 GN=H2B-VII PE=3 SV=1;tr|A0A6G0Y567|A0A6G0Y567_APHCR Histone H2B (Fragment) OS=Aphis craccivora OX=307492 GN=FWK35_00023645 PE=3 SV=1;tr|J9K3R4|J9K3R4_ACYPI Histone H2B OS=Acyrthosip	23	2	2	2	2	2	2	16.1	16.1	16.1	13.745	124	124;47;126;255;204;176;171;128;126;126;126;126;126;80;125;123;122;121;119;108;107;101;452	1	2	0	12.022	16.1	25467000	25467000	7	3638100	3638100	1	LLLPGELAK;QVHPDTGISSK				14	141;200	True;True	148;214	215;307	309;454	309;454			-1;-1;-1;-1;-1;-1;-1;-1;-1;-1;-1;-1;-1;-1;-1;-1;-1;-1;-1;-1;-1;-1;-1
15	A0A2S2NEH5;A0A6G0ZM80;A0A8R2H709;A0A6G0T8E3;A0A9P0J2Q1;A0A8R2JNF2	A0A2S2NEH5;A0A6G0ZM80;A0A8R2H709;A0A6G0T8E3;A0A9P0J2Q1;A0A8R2JNF2	1;1;1;1;1;1	1;1;1;1;1;1	1;1;1;1;1;1	tr|A0A2S2NEH5|A0A2S2NEH5_SCHGA Protein slit OS=Schizaphis graminum OX=13262 GN=sli_1 PE=4 SV=1;tr|A0A6G0ZM80|A0A6G0ZM80_APHCR Protein slit isoform X2 (Fragment) OS=Aphis craccivora OX=307492 GN=FWK35_00009459 PE=4 SV=1;tr|A0A8R2H709|A0A8R2H709_ACYPI Protei	6	1	1	1	1	1	1	1.5	1.5	1.5	68.928	614	614;1442;1452;1463;1482;1483	1	1	0	6.1169	1.5	0	0	28	0	0	1	LVDFMNAAR				15	158	TRUE	167	248	363	363	5	432	-1;-1;-1;-1;-1;-1
16	A0A2S2P8E1;A0A2S2PN35	A0A2S2P8E1;A0A2S2PN35	1;1	1;1	1;1	tr|A0A2S2P8E1|A0A2S2P8E1_SCHGA Uncharacterized protein (Fragment) OS=Schizaphis graminum OX=13262 GN=g.15327 PE=4 SV=1;tr|A0A2S2PN35|A0A2S2PN35_SCHGA Uncharacterized protein (Fragment) OS=Schizaphis graminum OX=13262 GN=g.175124 PE=4 SV=1	2	1	1	1	1	1	1	5.2	5.2	5.2	16.102	135	135;225	1	1	0	5.9942	5.2	18132000	18132000	7	2590300	2590300	1	TVDEIYK				17	276	TRUE	297	424	616	616			-1;-1
17	A0A6G0XR79;A0A2S2PFB3;C4WWC4;A0A6G0WAT6;A0A2S2PD23;A0A8R2AAJ1;A0A8R2FDD7;A0A2H8TYP7;A0A6G0VNL6	A0A6G0XR79;A0A2S2PFB3;C4WWC4;A0A6G0WAT6;A0A2S2PD23;A0A8R2AAJ1;A0A8R2FDD7;A0A2H8TYP7	3;3;3;3;3;3;2;2;1	3;3;3;3;3;3;2;2;1	3;3;3;3;3;3;2;2;1	tr|A0A6G0XR79|A0A6G0XR79_APHCR Histone H4 (Fragment) OS=Aphis craccivora OX=307492 GN=FWK35_00030062 PE=3 SV=1;tr|A0A2S2PFB3|A0A2S2PFB3_SCHGA Histone H4 (Fragment) OS=Schizaphis graminum OX=13262 GN=g.95804 PE=3 SV=1;tr|C4WWC4|C4WWC4_ACYPI Histone H4 OS=Ac	9	3	3	3	3	3	3	34.3	34.3	34.3	11.063	99	99;101;103;103;103;144;64;106;25	1	3	0	22.238	34.3	16854000	16854000	5	2320400	2320400	2	DNIQGITKPAIR;ISGLIYEETR;TVTAMDVVYALK				18	31;106;277	True;True;True	31;112;298	37;162;425	46;241;617	46;241;617			-1;-1;-1;-1;-1;-1;-1;-1;-1
18	A0A9P0JBE8;C4WVQ8;C4WVQ9;A0A6G0Y880;A0A9P0INE6;A0A2S2PG03	A0A9P0JBE8;C4WVQ8;C4WVQ9;A0A6G0Y880;A0A9P0INE6;A0A2S2PG03	1;1;1;1;1;1	1;1;1;1;1;1	1;1;1;1;1;1	tr|A0A9P0JBE8|A0A9P0JBE8_APHGO Genome assembly, chromosome: 3 OS=Aphis gossypii OX=80765 GN=APHIGO_LOCUS9100 PE=4 SV=1;tr|C4WVQ8|C4WVQ8_ACYPI ACYPI008299 protein OS=Acyrthosiphon pisum OX=7029 GN=ACYPI008299 PE=2 SV=1;tr|C4WVQ9|C4WVQ9_ACYPI ACYPI008299 pro	6	1	1	1	1	1	1	20	20	20	7.5352	70	70;124;132;132;134;260	1	1	0	6.1249	20	2739400	2739400	5	547880	547880	1	LGSSPSMSVSPQNR				19	135	TRUE	142	207	301	301	7	38	-1;-1;-1;-1;-1;-1
19	A0A9P0NDC0;A0A6G0T978	A0A9P0NDC0;A0A6G0T978	1;1	1;1	1;1	tr|A0A9P0NDC0|A0A9P0NDC0_APHGO Genome assembly, chromosome: 1 OS=Aphis gossypii OX=80765 GN=APHIGO_LOCUS2515 PE=4 SV=1;tr|A0A6G0T978|A0A6G0T978_APHGL Major facilitator superfamily (MFS) profile domain-containing protein OS=Aphis glycines OX=307491 GN=AGLY_	2	1	1	1	1	1	1	4.5	4.5	4.5	34.254	313	313;531	1	1	0	13.813	4.5	14728000	14728000	9	1636500	1636500	1	VELQSSKLDAENAK				20	285	TRUE	307	445	652	652			-1;-1
20	C4WVD4;A0A8R1XED9;A0A6G0ZD08;A0A8R1XHB1;A0A9P0J0X0;A0A6G0TAR3	C4WVD4;A0A8R1XED9;A0A6G0ZD08;A0A8R1XHB1;A0A9P0J0X0;A0A6G0TAR3	1;1;1;1;1;1	1;1;1;1;1;1	1;1;1;1;1;1	tr|C4WVD4|C4WVD4_ACYPI glycine hydroxymethyltransferase OS=Acyrthosiphon pisum OX=7029 PE=2 SV=1;tr|A0A8R1XED9|A0A8R1XED9_ACYPI Serine hydroxymethyltransferase OS=Acyrthosiphon pisum OX=7029 GN=100159628 PE=3 SV=1;tr|A0A6G0ZD08|A0A6G0ZD08_APHCR Serine hydr	6	1	1	1	1	1	1	5.4	5.4	5.4	18.306	166	166;474;477;498;501;501	1	1	0	7.3138	5.4	0	0	7	0	0	1	YSEGLPGAR				21	316	TRUE	338	488	739	739			-1;-1;-1;-1;-1;-1
21	A0A6G0U7P0	A0A6G0U7P0	1	1	1	tr|A0A6G0U7P0|A0A6G0U7P0_APHGL Uncharacterized protein OS=Aphis glycines OX=307491 GN=AGLY_000681 PE=4 SV=1	1	1	1	1	1	1	1	6.7	6.7	6.7	25.975	223	223	1	1	0	6.9876	6.7	3744300	3744300	11	340390	340390	1	LFNVYNIRYSNTRDK				24	132	TRUE	139	192	277	277			-1
22	A0A6G0VQ84	A0A6G0VQ84	1	1	1	tr|A0A6G0VQ84|A0A6G0VQ84_APHCR PHD domain-containing protein OS=Aphis craccivora OX=307492 GN=FWK35_00029015 PE=4 SV=1	1	1	1	1	1	1	1	5.7	5.7	5.7	18.077	158	158	1	1	0	5.988	5.7	9698400	9698400	9	1077600	1077600	1	LDNVIMELK				25	128	TRUE	135	188	270	270	10	110	-1
23	A0A6G0VWQ4	A0A6G0VWQ4	1	1	1	tr|A0A6G0VWQ4|A0A6G0VWQ4_APHCR RNA-directed DNA polymerase (Fragment) OS=Aphis craccivora OX=307492 GN=FWK35_00037415 PE=4 SV=1	1	1	1	1	1	1	1	0.9	0.9	0.9	135.14	1161	1161	1	1	0	6.5115	0.9	3214500	3214500	71	45274	45274	1	AVEAAEQNRK				26	23	TRUE	23	27	29	29			-1
24	A0A6G0WGD2	A0A6G0WGD2	1	1	1	tr|A0A6G0WGD2|A0A6G0WGD2_APHCR exoribonuclease II (Fragment) OS=Aphis craccivora OX=307492 GN=FWK35_00029665 PE=3 SV=1	1	1	1	1	1	1	1	0.7	0.7	0.7	185.32	1621	1621	1	1	0	6.1946	0.7	185490000	185490000	89	2084100	2084100	0	LDKSPVTNADK				27	127	TRUE	134	187	269	269			-1
25	A0A8R2H9Y1;A0A8R2B8M5;A0A6G0Y474	A0A8R2H9Y1;A0A8R2B8M5;A0A6G0Y474	1;1;1	1;1;1	1;1;1	tr|A0A8R2H9Y1|A0A8R2H9Y1_ACYPI TTF-type domain-containing protein OS=Acyrthosiphon pisum OX=7029 PE=4 SV=1;tr|A0A8R2B8M5|A0A8R2B8M5_ACYPI TTF-type domain-containing protein OS=Acyrthosiphon pisum OX=7029 PE=4 SV=1;tr|A0A6G0Y474|A0A6G0Y474_APHCR Zinc finger	3	1	1	1	1	1	1	1.6	1.6	1.6	105	917	917;958;1368	1	1	0	7.0242	1.6	425420000	425420000	48	8862900	8862900	2	LRTTMCQDRLEQMVK				28	155	TRUE	164	231	331;332	332	11;12	896;904	-1;-1;-1
26	A0A6G0YI97;A0A8R2H8Z4;A0A6G0YFZ9	A0A6G0YI97;A0A8R2H8Z4;A0A6G0YFZ9	1;1;1	1;1;1	1;1;1	tr|A0A6G0YI97|A0A6G0YI97_APHCR Uncharacterized protein OS=Aphis craccivora OX=307492 GN=FWK35_00018489 PE=4 SV=1;tr|A0A8R2H8Z4|A0A8R2H8Z4_ACYPI Uncharacterized protein OS=Acyrthosiphon pisum OX=7029 GN=100575698 PE=4 SV=1;tr|A0A6G0YFZ9|A0A6G0YFZ9_APHCR Unc	3	1	1	1	1	1	1	6.1	6.1	6.1	18.954	164	164;258;370	1	1	0	6.8958	6.1	13826000	13826000	7	1975200	1975200	1	YIDTIDPTAK				29	312	TRUE	334	484	734	734			-1;-1;-1
27	A0A6G0YU19;A0A6G0ZLT7;A0A2S2NFP9;A0A9P0JFS7;A0A9P0IV82;Q5XUA1;A0A8R2A239;A0A6G0TTA6;E2F7C4;A0A2S2NW12;A0A6G0TWT6	A0A6G0YU19;A0A6G0ZLT7;A0A2S2NFP9;A0A9P0JFS7;A0A9P0IV82;Q5XUA1;A0A8R2A239;A0A6G0TTA6	3;2;2;2;2;2;2;2;1;1;1	3;2;2;2;2;2;2;2;1;1;1	3;2;2;2;2;2;2;2;1;1;1	tr|A0A6G0YU19|A0A6G0YU19_APHCR ATP synthase subunit alpha, mitochondrial (Fragment) OS=Aphis craccivora OX=307492 GN=FWK35_00022031 PE=3 SV=1;tr|A0A6G0ZLT7|A0A6G0ZLT7_APHCR ATP synthase subunit alpha, mitochondrial (Fragment) OS=Aphis craccivora OX=307492	11	3	3	3	3	3	3	8.7	8.7	8.7	33.913	312	312;301;333;457;459;551;551;551;118;141;547	1	3	0	18.753	8.7	17826000	17826000	22	810290	810290	3	APGIIPR;AVDSLVPIGR;VITIGDGIAR				30	13;22;289	True;True;True	13;22;311	16;26;450	17;28;657	17;28;657			-1;-1;-1;-1;-1;-1;-1;-1;-1;-1;-1
28	A0A6G0YXA8	A0A6G0YXA8	1	1	1	tr|A0A6G0YXA8|A0A6G0YXA8_APHCR Odorant receptor 49b-like OS=Aphis craccivora OX=307492 GN=FWK35_00009750 PE=4 SV=1	1	1	1	1	1	1	1	7.5	7.5	7.5	17.416	147	147	1	1	0	6.7104	7.5	9674800	9674800	7	1382100	1382100	2	FLMIMFQRTQK				31	55	TRUE	58	84	129;130	129	13	103	-1
29	A0A8R2JNU0;A0A8R2JNX1;A0A8R2JP64;A0A6G0ZD92	A0A8R2JNU0;A0A8R2JNX1;A0A8R2JP64;A0A6G0ZD92	1;1;1;1	1;1;1;1	1;1;1;1	tr|A0A8R2JNU0|A0A8R2JNU0_ACYPI DNA-dependent protein kinase catalytic subunit CC3 domain-containing protein OS=Acyrthosiphon pisum OX=7029 PE=4 SV=1;tr|A0A8R2JNX1|A0A8R2JNX1_ACYPI FAT domain-containing protein OS=Acyrthosiphon pisum OX=7029 PE=4 SV=1;tr|A0	4	1	1	1	1	1	1	0.4	0.4	0.4	334.69	2874	2874;3175;3357;3967	1	1	0	7.5808	0.4	17609000	17609000	156	112880	112880	1	FRNEFISESRR				32	57	TRUE	60	86	132	132			-1;-1;-1;-1
30	A0A8R2HBC2;A0A8R2F705;A0A8R2B4K1	A0A8R2HBC2;A0A8R2F705;A0A8R2B4K1	1;1;1	1;1;1	1;1;1	tr|A0A8R2HBC2|A0A8R2HBC2_ACYPI Uncharacterized protein OS=Acyrthosiphon pisum OX=7029 PE=4 SV=1;tr|A0A8R2F705|A0A8R2F705_ACYPI Nucleoprotein TPR OS=Acyrthosiphon pisum OX=7029 PE=4 SV=1;tr|A0A8R2B4K1|A0A8R2B4K1_ACYPI Nucleoprotein TPR OS=Acyrthosiphon pisu	3	1	1	1	1	1	1	2.3	2.3	2.3	64.305	602	602;1172;1174	1	1	0	6.0418	2.3	171580	171580	19	9030.4	9030.4	1	MLEEENVLLSSQLK				34	159	TRUE	168	249	364	364			-1;-1;-1
31	A0A8R2F8V9	A0A8R2F8V9	2	2	2	tr|A0A8R2F8V9|A0A8R2F8V9_ACYPI Vitellogenin domain-containing protein OS=Acyrthosiphon pisum OX=7029 GN=100159010 PE=4 SV=1	1	2	2	2	2	2	2	0.8	0.8	0.8	329.77	2915	2915	1	2	0	14.145	0.8	2456200	2456200	145	16939	16939	2	LLQGTLVDSDEQK;SEAFSIVQEK				35	142;213	True;True	149;228	216;326	310;481	310;481			-1
32	A0A8R2NN35;A0A8R2F8W7	A0A8R2NN35;A0A8R2F8W7	1;1	1;1	1;1	tr|A0A8R2NN35|A0A8R2NN35_ACYPI Uncharacterized protein OS=Acyrthosiphon pisum OX=7029 GN=100166133 PE=4 SV=1;tr|A0A8R2F8W7|A0A8R2F8W7_ACYPI Uncharacterized protein OS=Acyrthosiphon pisum OX=7029 GN=100166133 PE=4 SV=1	2	1	1	1	1	1	1	0.5	0.5	0.5	157.3	1360	1360;1361	1	2	0	7.9294	0.5	29430000	29430000	68	432790	432790	1	APTDLSR				36	16	TRUE	16	19;20	20;21	21			-1;-1
33	A0A8R2JL05	A0A8R2JL05	1	1	1	tr|A0A8R2JL05|A0A8R2JL05_ACYPI Uncharacterized protein OS=Acyrthosiphon pisum OX=7029 PE=3 SV=1	1	1	1	1	1	1	1	0.3	0.3	0.3	386.67	3365	3365	1	1	0	6.1859	0.3	2063100	2063100	170	12136	12136	1	LIAGLSSENTR				38	136	TRUE	143	208	302	302			-1
34	K0D9J4;A0A8R2A156	K0D9J4;A0A8R2A156	2;1	2;1	2;1	tr|K0D9J4|K0D9J4_9HEMI Putative sheath protein (Fragment) OS=Metopolophium dirhodum OX=44670 GN=shp-1 PE=2 SV=1;tr|A0A8R2A156|A0A8R2A156_ACYPI Uncharacterized protein OS=Acyrthosiphon pisum OX=7029 PE=4 SV=1	2	2	2	2	2	2	2	2.6	2.6	2.6	90.803	804	804;1161	1	2	0	12.679	2.6	18650000	18650000	31	601620	601620	1	DVNPDWSTYDK;NPFIDQDLFR				69	36;173	True;True	38;187	46;280	67;420	67;420			-1;-1
35	V5KS27	V5KS27	2	1	1	tr|V5KS27|V5KS27_9HEMI HSC70b (Fragment) OS=Sitobion avenae OX=44664 PE=2 SV=1	1	2	1	1	2	1	1	25.8	12.5	12.5	12.82	120	120	1	1	0	6.2733	25.8	1788600	1788600	7	255510	255510	1	DAVVTVPAYFNDSQR;IINEPTAAALAYGLDK				70	29;96	True;False	29;100	35;132;133	44;201;202	44;201			-1

## Sheet: Sample two
		Reference	PepCount (	UniquePepCount	CoverPercent	MW	PI								No of missed Trypsin cleavage sites
S/N		FileScan	Sequence	MH+	Diff(MH+)	Charge	Rank	Score	DeltaScore	ExpectValue	Ions	Reference	DIFF_MODIFIED_CANDIDATE	PI	MissCleavage	Modification	MatchedTIC	NumProteaseTermini	Engine	Tag	Decoy
	$1-1	tr|K0D9J4|K0D9J4_9HEMI Putative sheath protein (Fragment) OS=Metopolophium dirhodum OX=44670 GN=shp-1 PE=2 SV=1	416	27	0.2898	90802.8	5.12
1		P20191202363_MD_SALIVA,5090	K.APSDIYK.N	793.409	0.00203	1	1	27.49	0	0.000267	0|0	tr|K0D9J4|K0D9J4_9HEMI		5.88	0		0	2	MASCOT		T
2		P20191202363_MD_SALIVA,5103	K.APSDIYK.N	793.409	-0.0001	2	1	25.1	0	0.000155	0|0	tr|K0D9J4|K0D9J4_9HEMI		5.88	0		0	2	MASCOT		T
3		P20191202363_MD_SALIVA,5345	K.APSDIYK.N	793.409	-0.00014	2	1	27.14	0	9.66e-05	0|0	tr|K0D9J4|K0D9J4_9HEMI		5.88	0		0	2	MASCOT		T
4		P20191202363_MD_SALIVA,5460	K.APSDIYK.N	793.409	3e-05	1	1	36.59	0	1.1e-05	0|0	tr|K0D9J4|K0D9J4_9HEMI		5.88	0		0	2	MASCOT		T
5		P20191202363_MD_SALIVA,5553	K.APSDIYK.N	793.409	-0.0003	2	1	37.95	0	1.6e-05	0|0	tr|K0D9J4|K0D9J4_9HEMI		5.88	0		0	2	MASCOT		T
6		P20191202363_MD_SALIVA,5805	K.APSDIYK.N	793.409	0.00056	2	1	33.36	0	2.31e-05	0|0	tr|K0D9J4|K0D9J4_9HEMI		5.88	0		0	2	MASCOT		T
7		P20191202363_MD_SALIVA,6005	K.APSDIYK.N	793.409	-0.0007	2	1	32.46	0	5.68e-05	0|0	tr|K0D9J4|K0D9J4_9HEMI		5.88	0		0	2	MASCOT		T
8		P20191202363_MD_SALIVA,6223	K.APSDIYK.N	793.409	-0.0001	2	1	33.68	0	2.14e-05	0|0	tr|K0D9J4|K0D9J4_9HEMI		5.88	0		0	2	MASCOT		T
9		P20191202363_MD_SALIVA,6494	K.APSDIYK.N	793.409	-0.00042	2	1	30.69	0	4.27e-05	0|0	tr|K0D9J4|K0D9J4_9HEMI		5.88	0		0	2	MASCOT		T
10		P20191202363_MD_SALIVA,7254	K.APSDIYK.N	793.409	-0.0005	2	1	25.97	0	0.000253	0|0	tr|K0D9J4|K0D9J4_9HEMI		5.88	0		0	2	MASCOT		T
11		P20191202363_MD_SALIVA,7844	K.APSDIYK.N	793.409	-0.0007	2	1	23.94	0	0.000404	0|0	tr|K0D9J4|K0D9J4_9HEMI		5.88	0		0	2	MASCOT		T
12		P20191202363_MD_SALIVA,8272	K.APSDIYK.N	793.409	0.0019	2	1	20.25	0	0.000944	0|0	tr|K0D9J4|K0D9J4_9HEMI		5.88	0		0	2	MASCOT		T
13		P20191202363_MD_SALIVA,8525	K.APSDIYK.N	793.409	-0.0007	2	1	29.73	0	0.000106	0|0	tr|K0D9J4|K0D9J4_9HEMI		5.88	0		0	2	MASCOT		T
14		P20191202363_MD_SALIVA,9614	K.APSDIYK.N	793.409	-0.0003	2	1	27.85	0	0.000164	0|0	tr|K0D9J4|K0D9J4_9HEMI		5.88	0		0	2	MASCOT		T
15		P20191202363_MD_SALIVA,12871	K.APSDIYK.N	793.409	0.0027	2	1	24.69	0	0.00034	0|0	tr|K0D9J4|K0D9J4_9HEMI		5.88	0		0	2	MASCOT		T
16		P20191202363_MD_SALIVA,39834	K.APSDIYK.N	793.409	-0.00042	2	1	27.1	0	9.75e-05	0|0	tr|K0D9J4|K0D9J4_9HEMI		5.88	0		0	2	MASCOT		T
17		P20191202363_MD_SALIVA,40505	K.APSDIYK.N	793.409	0.0004	2	1	21.64	0	0.000343	0|0	tr|K0D9J4|K0D9J4_9HEMI		5.88	0		0	2	MASCOT		T
18		P20191202363_MD_SALIVA,41650	K.APSDIYK.N	793.409	0.00138	2	1	20.92	0	0.000405	0|0	tr|K0D9J4|K0D9J4_9HEMI		5.88	0		0	2	MASCOT		T
19		P20191202363_MD_SALIVA,42130	K.APSDIYK.N	793.409	0.00128	2	1	30.55	0	4.41e-05	0|0	tr|K0D9J4|K0D9J4_9HEMI		5.88	0		0	2	MASCOT		T
20		P20191202363_MD_SALIVA,42596	K.APSDIYK.N	793.409	0.00014	2	1	21.86	0	0.000326	0|0	tr|K0D9J4|K0D9J4_9HEMI		5.88	0		0	2	MASCOT		T
21		P20191202363_MD_SALIVA,44820	K.APSDIYK.N	793.409	0.00024	2	1	23.27	0	0.000235	0|0	tr|K0D9J4|K0D9J4_9HEMI		5.88	0		0	2	MASCOT		T
22		P20191202363_MD_SALIVA,46662	K.APSDIYK.N	793.409	0.00046	2	1	22.33	0	0.000292	0|0	tr|K0D9J4|K0D9J4_9HEMI		5.88	0		0	2	MASCOT		T
23		P20191202363_MD_SALIVA,5740	K.AYEDIER.S	895.416	0.00065	2	1	40.41	0	4.55e-06	0|0	tr|K0D9J4|K0D9J4_9HEMI		4.14	0		0	2	MASCOT		T
24		P20191202363_MD_SALIVA,5964	K.AYEDIER.S	895.416	-0.00099	2	1	31.7	0	3.38e-05	0|0	tr|K0D9J4|K0D9J4_9HEMI		4.14	0		0	2	MASCOT		T
25		P20191202363_MD_SALIVA,6161	K.AYEDIER.S	895.416	-0.00021	2	1	41.52	0	3.52e-06	0|0	tr|K0D9J4|K0D9J4_9HEMI		4.14	0		0	2	MASCOT		T
26		P20191202363_MD_SALIVA,6509	K.AYEDIER.S	895.416	-0.00063	2	1	21.11	0	0.000387	0|0	tr|K0D9J4|K0D9J4_9HEMI		4.14	0		0	2	MASCOT		T
27		P20191202363_MD_SALIVA,6520	K.AYEDIER.S	895.416	-0.00054	1	1	29.96	0	5.05e-05	0|0	tr|K0D9J4|K0D9J4_9HEMI		4.14	0		0	2	MASCOT		T
28		P20191202363_MD_SALIVA,6789	K.AYEDIER.S	895.416	-0.00077	2	1	37.64	0	8.61e-06	0|0	tr|K0D9J4|K0D9J4_9HEMI		4.14	0		0	2	MASCOT		T
29		P20191202363_MD_SALIVA,7376	K.AYEDIER.S	895.416	-0.00617	2	1	20.34	0	0.000462	0|0	tr|K0D9J4|K0D9J4_9HEMI		4.14	0		0	2	MASCOT		T
30		P20191202363_MD_SALIVA,8273	K.AYEDIER.S	895.416	-0.00015	2	1	34.57	0	1.75e-05	0|0	tr|K0D9J4|K0D9J4_9HEMI		4.14	0		0	2	MASCOT		T
31		P20191202363_MD_SALIVA,10059	K.AYEDIER.S	895.416	3e-05	2	1	33.45	0	2.26e-05	0|0	tr|K0D9J4|K0D9J4_9HEMI		4.14	0		0	2	MASCOT		T
32		P20191202363_MD_SALIVA,3717	K.AYNDIK.A	723.367	0.00027	2	1	29.31	0	5.86e-05	0|0	tr|K0D9J4|K0D9J4_9HEMI		5.88	0		0	2	MASCOT		T
33		P20191202363_MD_SALIVA,4189	K.AYNDIK.A	723.367	0.00025	2	1	23.56	0	0.00022	0|0	tr|K0D9J4|K0D9J4_9HEMI		5.88	0		0	2	MASCOT		T
34		P20191202363_MD_SALIVA,4293	K.AYNDIK.A	723.367	-0.00025	1	1	30.89	0	4.07e-05	0|0	tr|K0D9J4|K0D9J4_9HEMI		5.88	0		0	2	MASCOT		T
35		P20191202363_MD_SALIVA,5634	K.AYNDIK.A	723.367	0.00155	1	1	23.07	0	0.000247	0|0	tr|K0D9J4|K0D9J4_9HEMI		5.88	0		0	2	MASCOT		T
36		P20191202363_MD_SALIVA,6104	K.AYNDIK.A	723.367	0.00043	2	1	36.71	0	1.07e-05	0|0	tr|K0D9J4|K0D9J4_9HEMI		5.88	0		0	2	MASCOT		T
37		P20191202363_MD_SALIVA,8907	K.AYNDIK.A	723.367	3e-05	2	1	21.33	0	0.000368	0|0	tr|K0D9J4|K0D9J4_9HEMI		5.88	0		0	2	MASCOT		T
38		P20191202363_MD_SALIVA,44894	K.AYNDIK.A	723.367	-0.00037	2	1	21.09	0	0.000389	0|0	tr|K0D9J4|K0D9J4_9HEMI		5.88	0		0	2	MASCOT		T
39		P20191202363_MD_SALIVA,18152	K.AYYELSVTSTTM*TK.S	1610.76	0.00112	2	1	57.19	0	9.55e-08	0|0	tr|K0D9J4|K0D9J4_9HEMI		6.04	0	15.994919 Oxidation (M)	0	2	MASCOT		T
40		P20191202363_MD_SALIVA,18415	K.AYYELSVTSTTM*TK.S	1610.76	0.0033	2	1	57.9	0	8.11e-08	0|0	tr|K0D9J4|K0D9J4_9HEMI		6.04	0	15.994919 Oxidation (M)	0	2	MASCOT		T
41		P20191202363_MD_SALIVA,18644	K.AYYELSVTSTTM*TK.S	1610.76	0.00262	2	1	71.83	0	3.28e-09	0|0	tr|K0D9J4|K0D9J4_9HEMI		6.04	0	15.994919 Oxidation (M)	0	2	MASCOT		T
42		P20191202363_MD_SALIVA,18891	K.AYYELSVTSTTM*TK.S	1610.76	0.0016	2	1	52.35	0	2.91e-07	0|0	tr|K0D9J4|K0D9J4_9HEMI		6.04	0	15.994919 Oxidation (M)	0	2	MASCOT		T
43		P20191202363_MD_SALIVA,19143	K.AYYELSVTSTTM*TK.S	1610.76	0.00236	2	1	42.16	0	3.04e-06	0|0	tr|K0D9J4|K0D9J4_9HEMI		6.04	0	15.994919 Oxidation (M)	0	2	MASCOT		T
44		P20191202363_MD_SALIVA,19398	K.AYYELSVTSTTM*TK.S	1610.76	0.00222	2	1	31.83	0	3.28e-05	0|0	tr|K0D9J4|K0D9J4_9HEMI		6.04	0	15.994919 Oxidation (M)	0	2	MASCOT		T
45		P20191202363_MD_SALIVA,19669	K.AYYELSVTSTTM*TK.S	1610.76	0.00148	2	1	65.25	0	1.49e-08	0|0	tr|K0D9J4|K0D9J4_9HEMI		6.04	0	15.994919 Oxidation (M)	0	2	MASCOT		T
46		P20191202363_MD_SALIVA,19914	K.AYYELSVTSTTM*TK.S	1610.76	0.003	2	1	53.41	0	2.28e-07	0|0	tr|K0D9J4|K0D9J4_9HEMI		6.04	0	15.994919 Oxidation (M)	0	2	MASCOT		T
47		P20191202363_MD_SALIVA,20496	K.AYYELSVTSTTM*TK.S	1610.76	0.00162	2	1	52.88	0	2.58e-07	0|0	tr|K0D9J4|K0D9J4_9HEMI		6.04	0	15.994919 Oxidation (M)	0	2	MASCOT		T
48		P20191202363_MD_SALIVA,20744	K.AYYELSVTSTTM*TK.S	1610.76	0.00276	2	1	61.89	0	3.24e-08	0|0	tr|K0D9J4|K0D9J4_9HEMI		6.04	0	15.994919 Oxidation (M)	0	2	MASCOT		T
49		P20191202363_MD_SALIVA,20996	K.AYYELSVTSTTM*TK.S	1610.76	0.0023	2	1	51.47	0	3.56e-07	0|0	tr|K0D9J4|K0D9J4_9HEMI		6.04	0	15.994919 Oxidation (M)	0	2	MASCOT		T
50		P20191202363_MD_SALIVA,21683	K.AYYELSVTSTTM*TK.S	1610.76	0.00268	2	1	58.2	0	7.57e-08	0|0	tr|K0D9J4|K0D9J4_9HEMI		6.04	0	15.994919 Oxidation (M)	0	2	MASCOT		T
51		P20191202363_MD_SALIVA,21912	K.AYYELSVTSTTM*TK.S	1610.76	0.0048	2	1	51.76	0	3.33e-07	0|0	tr|K0D9J4|K0D9J4_9HEMI		6.04	0	15.994919 Oxidation (M)	0	2	MASCOT		T
52		P20191202363_MD_SALIVA,22163	K.AYYELSVTSTTM*TK.S	1610.76	0.00398	2	1	66.53	0	1.11e-08	0|0	tr|K0D9J4|K0D9J4_9HEMI		6.04	0	15.994919 Oxidation (M)	0	2	MASCOT		T
53		P20191202363_MD_SALIVA,22481	K.AYYELSVTSTTM*TK.S	1610.76	0.00198	2	1	65.5	0	1.41e-08	0|0	tr|K0D9J4|K0D9J4_9HEMI		6.04	0	15.994919 Oxidation (M)	0	2	MASCOT		T
54		P20191202363_MD_SALIVA,22765	K.AYYELSVTSTTM*TK.S	1610.76	0.00448	2	1	24.18	0	0.000191	0|0	tr|K0D9J4|K0D9J4_9HEMI		6.04	0	15.994919 Oxidation (M)	0	2	MASCOT		T
55		P20191202363_MD_SALIVA,23009	K.AYYELSVTSTTM*TK.S	1610.76	0.00092	2	1	62.87	0	2.58e-08	0|0	tr|K0D9J4|K0D9J4_9HEMI		6.04	0	15.994919 Oxidation (M)	0	2	MASCOT		T
56		P20191202363_MD_SALIVA,23257	K.AYYELSVTSTTM*TK.S	1610.76	0.007	2	1	21.53	0	0.000352	0|0	tr|K0D9J4|K0D9J4_9HEMI		6.04	0	15.994919 Oxidation (M)	0	2	MASCOT		T
57		P20191202363_MD_SALIVA,23647	K.AYYELSVTSTTM*TK.S	1610.76	0.00266	2	1	70.24	0	4.73e-09	0|0	tr|K0D9J4|K0D9J4_9HEMI		6.04	0	15.994919 Oxidation (M)	0	2	MASCOT		T
58		P20191202363_MD_SALIVA,23958	K.AYYELSVTSTTM*TK.S	1610.76	-0.00146	2	1	58.2	0	7.57e-08	0|0	tr|K0D9J4|K0D9J4_9HEMI		6.04	0	15.994919 Oxidation (M)	0	2	MASCOT		T
59		P20191202363_MD_SALIVA,24210	K.AYYELSVTSTTM*TK.S	1610.76	0.0028	2	1	52.67	0	2.7e-07	0|0	tr|K0D9J4|K0D9J4_9HEMI		6.04	0	15.994919 Oxidation (M)	0	2	MASCOT		T
60		P20191202363_MD_SALIVA,24462	K.AYYELSVTSTTM*TK.S	1610.76	0.00408	2	1	38.75	0	6.67e-06	0|0	tr|K0D9J4|K0D9J4_9HEMI		6.04	0	15.994919 Oxidation (M)	0	2	MASCOT		T
61		P20191202363_MD_SALIVA,25135	K.AYYELSVTSTTM*TK.S	1610.76	0.00136	2	1	47.9	0	8.11e-07	0|0	tr|K0D9J4|K0D9J4_9HEMI		6.04	0	15.994919 Oxidation (M)	0	2	MASCOT		T
62		P20191202363_MD_SALIVA,25383	K.AYYELSVTSTTM*TK.S	1610.76	0.00424	2	1	25.86	0	0.00013	0|0	tr|K0D9J4|K0D9J4_9HEMI		6.04	0	15.994919 Oxidation (M)	0	2	MASCOT		T
63		P20191202363_MD_SALIVA,25633	K.AYYELSVTSTTM*TK.S	1610.76	-0.0006	2	1	40.7	0	4.26e-06	0|0	tr|K0D9J4|K0D9J4_9HEMI		6.04	0	15.994919 Oxidation (M)	0	2	MASCOT		T
64		P20191202363_MD_SALIVA,25858	K.AYYELSVTSTTM*TK.S	1610.76	-0.0013	2	1	26.63	0	0.000109	0|0	tr|K0D9J4|K0D9J4_9HEMI		6.04	0	15.994919 Oxidation (M)	0	2	MASCOT		T
65		P20191202363_MD_SALIVA,26195	K.AYYELSVTSTTM*TK.S	1610.76	0.005	2	1	38.18	0	7.6e-06	0|0	tr|K0D9J4|K0D9J4_9HEMI		6.04	0	15.994919 Oxidation (M)	0	2	MASCOT		T
66		P20191202363_MD_SALIVA,26935	K.AYYELSVTSTTM*TK.S	1610.76	0.00668	2	1	29.45	0	5.68e-05	0|0	tr|K0D9J4|K0D9J4_9HEMI		6.04	0	15.994919 Oxidation (M)	0	2	MASCOT		T
67		P20191202363_MD_SALIVA,27170	K.AYYELSVTSTTM*TK.S	1610.76	0.00108	2	1	54.58	0	1.74e-07	0|0	tr|K0D9J4|K0D9J4_9HEMI		6.04	0	15.994919 Oxidation (M)	0	2	MASCOT		T
68		P20191202363_MD_SALIVA,27707	K.AYYELSVTSTTM*TK.S	1610.76	0.00304	2	1	22.82	0	0.000261	0|0	tr|K0D9J4|K0D9J4_9HEMI		6.04	0	15.994919 Oxidation (M)	0	2	MASCOT		T
69		P20191202363_MD_SALIVA,27970	K.AYYELSVTSTTM*TK.S	1610.76	0.00168	2	1	39.45	0	5.68e-06	0|0	tr|K0D9J4|K0D9J4_9HEMI		6.04	0	15.994919 Oxidation (M)	0	2	MASCOT		T
70		P20191202363_MD_SALIVA,28614	K.AYYELSVTSTTM*TK.S	1610.76	0.00648	2	1	50.54	0	4.42e-07	0|0	tr|K0D9J4|K0D9J4_9HEMI		6.04	0	15.994919 Oxidation (M)	0	2	MASCOT		T
71		P20191202363_MD_SALIVA,30505	K.AYYELSVTSTTM*TK.S	1610.76	0.00268	2	1	22.71	0	0.000268	0|0	tr|K0D9J4|K0D9J4_9HEMI		6.04	0	15.994919 Oxidation (M)	0	2	MASCOT		T
72		P20191202363_MD_SALIVA,31339	K.AYYELSVTSTTM*TK.S	1610.76	0.00274	2	1	33.37	0	2.3e-05	0|0	tr|K0D9J4|K0D9J4_9HEMI		6.04	0	15.994919 Oxidation (M)	0	2	MASCOT		T
73		P20191202363_MD_SALIVA,32244	K.AYYELSVTSTTM*TK.S	1610.76	0.00508	2	1	22.94	0	0.000254	0|0	tr|K0D9J4|K0D9J4_9HEMI		6.04	0	15.994919 Oxidation (M)	0	2	MASCOT		T
74		P20191202363_MD_SALIVA,32466	K.AYYELSVTSTTM*TK.S	1610.76	0.00046	2	1	52.67	0	2.7e-07	0|0	tr|K0D9J4|K0D9J4_9HEMI		6.04	0	15.994919 Oxidation (M)	0	2	MASCOT		T
75		P20191202363_MD_SALIVA,33289	K.AYYELSVTSTTM*TK.S	1610.76	0.0019	2	1	28.21	0	7.55e-05	0|0	tr|K0D9J4|K0D9J4_9HEMI		6.04	0	15.994919 Oxidation (M)	0	2	MASCOT		T
76		P20191202363_MD_SALIVA,41519	K.AYYELSVTSTTM*TK.S	1610.76	-0.00134	2	1	28.8	0	6.59e-05	0|0	tr|K0D9J4|K0D9J4_9HEMI		6.04	0	15.994919 Oxidation (M)	0	2	MASCOT		T
77		P20191202363_MD_SALIVA,42220	K.AYYELSVTSTTM*TK.S	1610.76	8e-05	2	1	26.7	0	0.000107	0|0	tr|K0D9J4|K0D9J4_9HEMI		6.04	0	15.994919 Oxidation (M)	0	2	MASCOT		T
78		P20191202363_MD_SALIVA,43078	K.AYYELSVTSTTM*TK.S	1610.76	0.00328	2	1	29.41	0	5.73e-05	0|0	tr|K0D9J4|K0D9J4_9HEMI		6.04	0	15.994919 Oxidation (M)	0	2	MASCOT		T
79		P20191202363_MD_SALIVA,43309	K.AYYELSVTSTTM*TK.S	1610.76	0.00174	2	1	25.42	0	0.000144	0|0	tr|K0D9J4|K0D9J4_9HEMI		6.04	0	15.994919 Oxidation (M)	0	2	MASCOT		T
80		P20191202363_MD_SALIVA,43544	K.AYYELSVTSTTM*TK.S	1610.76	-0.00012	2	1	32.26	0	2.97e-05	0|0	tr|K0D9J4|K0D9J4_9HEMI		6.04	0	15.994919 Oxidation (M)	0	2	MASCOT		T
81		P20191202363_MD_SALIVA,44223	K.AYYELSVTSTTM*TK.S	1610.76	0.00328	2	1	24.43	0	0.00018	0|0	tr|K0D9J4|K0D9J4_9HEMI		6.04	0	15.994919 Oxidation (M)	0	2	MASCOT		T
82		P20191202363_MD_SALIVA,44467	K.AYYELSVTSTTM*TK.S	1610.76	0.00316	2	1	23.65	0	0.000216	0|0	tr|K0D9J4|K0D9J4_9HEMI		6.04	0	15.994919 Oxidation (M)	0	2	MASCOT		T
83		P20191202363_MD_SALIVA,44695	K.AYYELSVTSTTM*TK.S	1610.76	0.00068	2	1	22.39	0	0.000288	0|0	tr|K0D9J4|K0D9J4_9HEMI		6.04	0	15.994919 Oxidation (M)	0	2	MASCOT		T
84		P20191202363_MD_SALIVA,45371	K.AYYELSVTSTTM*TK.S	1610.76	0.00036	2	1	30.63	0	4.32e-05	0|0	tr|K0D9J4|K0D9J4_9HEMI		6.04	0	15.994919 Oxidation (M)	0	2	MASCOT		T
85		P20191202363_MD_SALIVA,46376	K.AYYELSVTSTTM*TK.S	1610.76	-0.0017	2	1	20.5	0	0.000446	0|0	tr|K0D9J4|K0D9J4_9HEMI		6.04	0	15.994919 Oxidation (M)	0	2	MASCOT		T
86		P20191202363_MD_SALIVA,47738	K.AYYELSVTSTTM*TK.S	1610.76	0.001	2	1	23.86	0	0.000206	0|0	tr|K0D9J4|K0D9J4_9HEMI		6.04	0	15.994919 Oxidation (M)	0	2	MASCOT		T
87		P20191202363_MD_SALIVA,48402	K.AYYELSVTSTTM*TK.S	1610.76	-0.00112	2	1	27.76	0	8.37e-05	0|0	tr|K0D9J4|K0D9J4_9HEMI		6.04	0	15.994919 Oxidation (M)	0	2	MASCOT		T
88		P20191202363_MD_SALIVA,50697	K.AYYELSVTSTTM*TK.S	1610.76	0.0015	2	1	37.94	0	8.03e-06	0|0	tr|K0D9J4|K0D9J4_9HEMI		6.04	0	15.994919 Oxidation (M)	0	2	MASCOT		T
89		P20191202363_MD_SALIVA,50910	K.AYYELSVTSTTM*TK.S	1610.76	0.00074	2	1	51.48	0	3.56e-07	0|0	tr|K0D9J4|K0D9J4_9HEMI		6.04	0	15.994919 Oxidation (M)	0	2	MASCOT		T
90		P20191202363_MD_SALIVA,51134	K.AYYELSVTSTTM*TK.S	1610.76	0.00144	2	1	62.36	0	2.9e-08	0|0	tr|K0D9J4|K0D9J4_9HEMI		6.04	0	15.994919 Oxidation (M)	0	2	MASCOT		T
91		P20191202363_MD_SALIVA,51353	K.AYYELSVTSTTM*TK.S	1610.76	0.00148	2	1	62.11	0	3.08e-08	0|0	tr|K0D9J4|K0D9J4_9HEMI		6.04	0	15.994919 Oxidation (M)	0	2	MASCOT		T
92		P20191202363_MD_SALIVA,51584	K.AYYELSVTSTTM*TK.S	1610.76	0.00042	2	1	52.09	0	3.09e-07	0|0	tr|K0D9J4|K0D9J4_9HEMI		6.04	0	15.994919 Oxidation (M)	0	2	MASCOT		T
93		P20191202363_MD_SALIVA,51784	K.AYYELSVTSTTM*TK.S	1610.76	0.0004	2	1	44.83	0	1.64e-06	0|0	tr|K0D9J4|K0D9J4_9HEMI		6.04	0	15.994919 Oxidation (M)	0	2	MASCOT		T
94		P20191202363_MD_SALIVA,51994	K.AYYELSVTSTTM*TK.S	1610.76	0.00072	2	1	51.87	0	3.25e-07	0|0	tr|K0D9J4|K0D9J4_9HEMI		6.04	0	15.994919 Oxidation (M)	0	2	MASCOT		T
95		P20191202363_MD_SALIVA,52200	K.AYYELSVTSTTM*TK.S	1610.76	0.00024	2	1	36.9	0	1.02e-05	0|0	tr|K0D9J4|K0D9J4_9HEMI		6.04	0	15.994919 Oxidation (M)	0	2	MASCOT		T
96		P20191202363_MD_SALIVA,52410	K.AYYELSVTSTTM*TK.S	1610.76	0.00026	2	1	37.99	0	7.94e-06	0|0	tr|K0D9J4|K0D9J4_9HEMI		6.04	0	15.994919 Oxidation (M)	0	2	MASCOT		T
97		P20191202363_MD_SALIVA,19442	K.AYYELSVTSTTMTK.S	1594.77	0.00244	2	1	56.43	0	2.28e-07	0|0	tr|K0D9J4|K0D9J4_9HEMI		6.04	0		0	2	MASCOT		T
98		P20191202363_MD_SALIVA,21453	K.AYYELSVTSTTMTK.S	1594.77	0.00956	2	1	74.8	0	3.31e-09	0|0	tr|K0D9J4|K0D9J4_9HEMI		6.04	0		0	2	MASCOT		T
99		P20191202363_MD_SALIVA,21699	K.AYYELSVTSTTMTK.S	1594.77	0.00316	2	1	79.26	0	1.19e-09	0|0	tr|K0D9J4|K0D9J4_9HEMI		6.04	0		0	2	MASCOT		T
100		P20191202363_MD_SALIVA,21933	K.AYYELSVTSTTMTK.S	1594.77	0.00219	2	1	83.32	0	4.66e-10	0|0	tr|K0D9J4|K0D9J4_9HEMI		6.04	0		0	2	MASCOT		T
101		P20191202363_MD_SALIVA,21975	K.AYYELSVTSTTMTK.S	1594.77	0.0054	3	1	20.43	0	0.000906	0|0	tr|K0D9J4|K0D9J4_9HEMI		6.04	0		0	2	MASCOT		T
102		P20191202363_MD_SALIVA,22184	K.AYYELSVTSTTMTK.S	1594.77	0.00381	2	1	78.47	0	1.42e-09	0|0	tr|K0D9J4|K0D9J4_9HEMI		6.04	0		0	2	MASCOT		T
103		P20191202363_MD_SALIVA,22439	K.AYYELSVTSTTMTK.S	1594.77	-0.00033	2	1	78.32	0	1.47e-09	0|0	tr|K0D9J4|K0D9J4_9HEMI		6.04	0		0	2	MASCOT		T
104		P20191202363_MD_SALIVA,22692	K.AYYELSVTSTTMTK.S	1594.77	0.00176	2	1	78.88	0	1.29e-09	0|0	tr|K0D9J4|K0D9J4_9HEMI		6.04	0		0	2	MASCOT		T
105		P20191202363_MD_SALIVA,22943	K.AYYELSVTSTTMTK.S	1594.77	0.00144	2	1	78.37	0	1.46e-09	0|0	tr|K0D9J4|K0D9J4_9HEMI		6.04	0		0	2	MASCOT		T
106		P20191202363_MD_SALIVA,23189	K.AYYELSVTSTTMTK.S	1594.77	-0.00699	2	1	64.99	0	3.17e-08	0|0	tr|K0D9J4|K0D9J4_9HEMI		6.04	0		0	2	MASCOT		T
107		P20191202363_MD_SALIVA,23428	K.AYYELSVTSTTMTK.S	1594.77	0.00257	2	1	82.95	0	5.07e-10	0|0	tr|K0D9J4|K0D9J4_9HEMI		6.04	0		0	2	MASCOT		T
108		P20191202363_MD_SALIVA,23668	K.AYYELSVTSTTMTK.S	1594.77	0.00188	2	1	78.58	0	1.39e-09	0|0	tr|K0D9J4|K0D9J4_9HEMI		6.04	0		0	2	MASCOT		T
109		P20191202363_MD_SALIVA,23885	K.AYYELSVTSTTMTK.S	1594.77	-0.00084	3	1	28.2	0	0.000151	0|0	tr|K0D9J4|K0D9J4_9HEMI		6.04	0		0	2	MASCOT		T
110		P20191202363_MD_SALIVA,23913	K.AYYELSVTSTTMTK.S	1594.77	0.00275	2	1	78.59	0	1.38e-09	0|0	tr|K0D9J4|K0D9J4_9HEMI		6.04	0		0	2	MASCOT		T
111		P20191202363_MD_SALIVA,24165	K.AYYELSVTSTTMTK.S	1594.77	0.00298	2	1	90.65	0	8.61e-11	0|0	tr|K0D9J4|K0D9J4_9HEMI		6.04	0		0	2	MASCOT		T
112		P20191202363_MD_SALIVA,24289	K.AYYELSVTSTTMTK.S	1594.77	0.0018	3	1	21.34	0	0.000735	0|0	tr|K0D9J4|K0D9J4_9HEMI		6.04	0		0	2	MASCOT		T
113		P20191202363_MD_SALIVA,24420	K.AYYELSVTSTTMTK.S	1594.77	-0.00198	2	1	69.65	0	1.08e-08	0|0	tr|K0D9J4|K0D9J4_9HEMI		6.04	0		0	2	MASCOT		T
114		P20191202363_MD_SALIVA,24674	K.AYYELSVTSTTMTK.S	1594.77	-0.00203	2	1	67.21	0	1.9e-08	0|0	tr|K0D9J4|K0D9J4_9HEMI		6.04	0		0	2	MASCOT		T
115		P20191202363_MD_SALIVA,24926	K.AYYELSVTSTTMTK.S	1594.77	0.00085	2	1	74.48	0	3.56e-09	0|0	tr|K0D9J4|K0D9J4_9HEMI		6.04	0		0	2	MASCOT		T
116		P20191202363_MD_SALIVA,25217	K.AYYELSVTSTTMTK.S	1594.77	0.00255	2	1	63.24	0	4.74e-08	0|0	tr|K0D9J4|K0D9J4_9HEMI		6.04	0		0	2	MASCOT		T
117		P20191202363_MD_SALIVA,25465	K.AYYELSVTSTTMTK.S	1594.77	0.00342	2	1	69.43	0	1.14e-08	0|0	tr|K0D9J4|K0D9J4_9HEMI		6.04	0		0	2	MASCOT		T
118		P20191202363_MD_SALIVA,25697	K.AYYELSVTSTTMTK.S	1594.77	0.0032	2	1	82.38	0	5.78e-10	0|0	tr|K0D9J4|K0D9J4_9HEMI		6.04	0		0	2	MASCOT		T
119		P20191202363_MD_SALIVA,25942	K.AYYELSVTSTTMTK.S	1594.77	0.00121	2	1	39.78	0	1.05e-05	0|0	tr|K0D9J4|K0D9J4_9HEMI		6.04	0		0	2	MASCOT		T
120		P20191202363_MD_SALIVA,26323	K.AYYELSVTSTTMTK.S	1594.77	0.00212	2	1	65.43	0	2.86e-08	0|0	tr|K0D9J4|K0D9J4_9HEMI		6.04	0		0	2	MASCOT		T
121		P20191202363_MD_SALIVA,26420	K.AYYELSVTSTTMTK.S	1594.77	-0.00018	3	1	31.45	0	7.16e-05	0|0	tr|K0D9J4|K0D9J4_9HEMI		6.04	0		0	2	MASCOT		T
122		P20191202363_MD_SALIVA,26572	K.AYYELSVTSTTMTK.S	1594.77	0.00208	2	1	78.14	0	1.53e-09	0|0	tr|K0D9J4|K0D9J4_9HEMI		6.04	0		0	2	MASCOT		T
123		P20191202363_MD_SALIVA,26824	K.AYYELSVTSTTMTK.S	1594.77	-0.00058	2	1	81.23	0	7.53e-10	0|0	tr|K0D9J4|K0D9J4_9HEMI		6.04	0		0	2	MASCOT		T
124		P20191202363_MD_SALIVA,27056	K.AYYELSVTSTTMTK.S	1594.77	0.00324	2	1	68.31	0	1.48e-08	0|0	tr|K0D9J4|K0D9J4_9HEMI		6.04	0		0	2	MASCOT		T
125		P20191202363_MD_SALIVA,27287	K.AYYELSVTSTTMTK.S	1594.77	0.00129	2	1	76.24	0	2.38e-09	0|0	tr|K0D9J4|K0D9J4_9HEMI		6.04	0		0	2	MASCOT		T
126		P20191202363_MD_SALIVA,27518	K.AYYELSVTSTTMTK.S	1594.77	0.0046	2	1	85.67	0	2.71e-10	0|0	tr|K0D9J4|K0D9J4_9HEMI		6.04	0		0	2	MASCOT		T
127		P20191202363_MD_SALIVA,27770	K.AYYELSVTSTTMTK.S	1594.77	0.00211	2	1	82.67	0	5.41e-10	0|0	tr|K0D9J4|K0D9J4_9HEMI		6.04	0		0	2	MASCOT		T
128		P20191202363_MD_SALIVA,28005	K.AYYELSVTSTTMTK.S	1594.77	0.00204	2	1	82.37	0	5.79e-10	0|0	tr|K0D9J4|K0D9J4_9HEMI		6.04	0		0	2	MASCOT		T
129		P20191202363_MD_SALIVA,28479	K.AYYELSVTSTTMTK.S	1594.77	0.00154	2	1	87.24	0	1.89e-10	0|0	tr|K0D9J4|K0D9J4_9HEMI		6.04	0		0	2	MASCOT		T
130		P20191202363_MD_SALIVA,28732	K.AYYELSVTSTTMTK.S	1594.77	0.00057	2	1	66.23	0	2.38e-08	0|0	tr|K0D9J4|K0D9J4_9HEMI		6.04	0		0	2	MASCOT		T
131		P20191202363_MD_SALIVA,28962	K.AYYELSVTSTTMTK.S	1594.77	0.00345	2	1	78.31	0	1.48e-09	0|0	tr|K0D9J4|K0D9J4_9HEMI		6.04	0		0	2	MASCOT		T
132		P20191202363_MD_SALIVA,29228	K.AYYELSVTSTTMTK.S	1594.77	0.00113	2	1	78.07	0	1.56e-09	0|0	tr|K0D9J4|K0D9J4_9HEMI		6.04	0		0	2	MASCOT		T
133		P20191202363_MD_SALIVA,29605	K.AYYELSVTSTTMTK.S	1594.77	0.0023	2	1	82.23	0	5.98e-10	0|0	tr|K0D9J4|K0D9J4_9HEMI		6.04	0		0	2	MASCOT		T
134		P20191202363_MD_SALIVA,29835	K.AYYELSVTSTTMTK.S	1594.77	-0.00056	2	1	78.63	0	1.37e-09	0|0	tr|K0D9J4|K0D9J4_9HEMI		6.04	0		0	2	MASCOT		T
135		P20191202363_MD_SALIVA,30085	K.AYYELSVTSTTMTK.S	1594.77	0.00237	2	1	74.33	0	3.69e-09	0|0	tr|K0D9J4|K0D9J4_9HEMI		6.04	0		0	2	MASCOT		T
136		P20191202363_MD_SALIVA,30475	K.AYYELSVTSTTMTK.S	1594.77	0.00517	2	1	53.92	0	4.06e-07	0|0	tr|K0D9J4|K0D9J4_9HEMI		6.04	0		0	2	MASCOT		T
137		P20191202363_MD_SALIVA,30834	K.AYYELSVTSTTMTK.S	1594.77	0.00293	2	1	78.09	0	1.55e-09	0|0	tr|K0D9J4|K0D9J4_9HEMI		6.04	0		0	2	MASCOT		T
138		P20191202363_MD_SALIVA,31255	K.AYYELSVTSTTMTK.S	1594.77	0.00104	2	1	68.47	0	1.42e-08	0|0	tr|K0D9J4|K0D9J4_9HEMI		6.04	0		0	2	MASCOT		T
139		P20191202363_MD_SALIVA,31546	K.AYYELSVTSTTMTK.S	1594.77	0.00268	2	1	64.2	0	3.8e-08	0|0	tr|K0D9J4|K0D9J4_9HEMI		6.04	0		0	2	MASCOT		T
140		P20191202363_MD_SALIVA,31832	K.AYYELSVTSTTMTK.S	1594.77	0.00196	2	1	73.42	0	4.55e-09	0|0	tr|K0D9J4|K0D9J4_9HEMI		6.04	0		0	2	MASCOT		T
141		P20191202363_MD_SALIVA,32068	K.AYYELSVTSTTMTK.S	1594.77	0.00039	2	1	65.04	0	3.13e-08	0|0	tr|K0D9J4|K0D9J4_9HEMI		6.04	0		0	2	MASCOT		T
142		P20191202363_MD_SALIVA,32297	K.AYYELSVTSTTMTK.S	1594.77	0.00077	2	1	79.31	0	1.17e-09	0|0	tr|K0D9J4|K0D9J4_9HEMI		6.04	0		0	2	MASCOT		T
143		P20191202363_MD_SALIVA,32528	K.AYYELSVTSTTMTK.S	1594.77	0.00252	2	1	82.04	0	6.25e-10	0|0	tr|K0D9J4|K0D9J4_9HEMI		6.04	0		0	2	MASCOT		T
144		P20191202363_MD_SALIVA,32757	K.AYYELSVTSTTMTK.S	1594.77	-0.00144	2	1	68.06	0	1.56e-08	0|0	tr|K0D9J4|K0D9J4_9HEMI		6.04	0		0	2	MASCOT		T
145		P20191202363_MD_SALIVA,32998	K.AYYELSVTSTTMTK.S	1594.77	0.00392	2	1	56.19	0	2.4e-07	0|0	tr|K0D9J4|K0D9J4_9HEMI		6.04	0		0	2	MASCOT		T
146		P20191202363_MD_SALIVA,33390	K.AYYELSVTSTTMTK.S	1594.77	0.00136	2	1	70.16	0	9.64e-09	0|0	tr|K0D9J4|K0D9J4_9HEMI		6.04	0		0	2	MASCOT		T
147		P20191202363_MD_SALIVA,33619	K.AYYELSVTSTTMTK.S	1594.77	-0.00254	2	1	79.94	0	1.01e-09	0|0	tr|K0D9J4|K0D9J4_9HEMI		6.04	0		0	2	MASCOT		T
148		P20191202363_MD_SALIVA,34360	K.AYYELSVTSTTMTK.S	1594.77	0.0014	2	1	60.68	0	8.55e-08	0|0	tr|K0D9J4|K0D9J4_9HEMI		6.04	0		0	2	MASCOT		T
149		P20191202363_MD_SALIVA,35049	K.AYYELSVTSTTMTK.S	1594.77	-0.00084	2	1	56.32	0	2.33e-07	0|0	tr|K0D9J4|K0D9J4_9HEMI		6.04	0		0	2	MASCOT		T
150		P20191202363_MD_SALIVA,35290	K.AYYELSVTSTTMTK.S	1594.77	0.00396	2	1	82.52	0	5.6e-10	0|0	tr|K0D9J4|K0D9J4_9HEMI		6.04	0		0	2	MASCOT		T
151		P20191202363_MD_SALIVA,36438	K.AYYELSVTSTTMTK.S	1594.77	0.00258	2	1	90.52	0	8.87e-11	0|0	tr|K0D9J4|K0D9J4_9HEMI		6.04	0		0	2	MASCOT		T
152		P20191202363_MD_SALIVA,37161	K.AYYELSVTSTTMTK.S	1594.77	0.00057	2	1	26.87	0	0.000206	0|0	tr|K0D9J4|K0D9J4_9HEMI		6.04	0		0	2	MASCOT		T
153		P20191202363_MD_SALIVA,37409	K.AYYELSVTSTTMTK.S	1594.77	0.00136	2	1	78.2	0	1.51e-09	0|0	tr|K0D9J4|K0D9J4_9HEMI		6.04	0		0	2	MASCOT		T
154		P20191202363_MD_SALIVA,38218	K.AYYELSVTSTTMTK.S	1594.77	-0.0032	2	1	60.49	0	8.93e-08	0|0	tr|K0D9J4|K0D9J4_9HEMI		6.04	0		0	2	MASCOT		T
155		P20191202363_MD_SALIVA,38447	K.AYYELSVTSTTMTK.S	1594.77	0.0005	2	1	74.82	0	3.3e-09	0|0	tr|K0D9J4|K0D9J4_9HEMI		6.04	0		0	2	MASCOT		T
156		P20191202363_MD_SALIVA,38800	K.AYYELSVTSTTMTK.S	1594.77	0.00157	2	1	67.67	0	1.71e-08	0|0	tr|K0D9J4|K0D9J4_9HEMI		6.04	0		0	2	MASCOT		T
157		P20191202363_MD_SALIVA,39028	K.AYYELSVTSTTMTK.S	1594.77	-0.0004	2	1	82.88	0	5.15e-10	0|0	tr|K0D9J4|K0D9J4_9HEMI		6.04	0		0	2	MASCOT		T
158		P20191202363_MD_SALIVA,39258	K.AYYELSVTSTTMTK.S	1594.77	0.00347	2	1	68.89	0	1.29e-08	0|0	tr|K0D9J4|K0D9J4_9HEMI		6.04	0		0	2	MASCOT		T
159		P20191202363_MD_SALIVA,39491	K.AYYELSVTSTTMTK.S	1594.77	-0.00365	2	1	75.01	0	3.16e-09	0|0	tr|K0D9J4|K0D9J4_9HEMI		6.04	0		0	2	MASCOT		T
160		P20191202363_MD_SALIVA,39850	K.AYYELSVTSTTMTK.S	1594.77	0.00096	2	1	88.86	0	1.3e-10	0|0	tr|K0D9J4|K0D9J4_9HEMI		6.04	0		0	2	MASCOT		T
161		P20191202363_MD_SALIVA,40312	K.AYYELSVTSTTMTK.S	1594.77	-0.00077	2	1	69.43	0	1.14e-08	0|0	tr|K0D9J4|K0D9J4_9HEMI		6.04	0		0	2	MASCOT		T
162		P20191202363_MD_SALIVA,40543	K.AYYELSVTSTTMTK.S	1594.77	0.00373	2	1	70.7	0	8.51e-09	0|0	tr|K0D9J4|K0D9J4_9HEMI		6.04	0		0	2	MASCOT		T
163		P20191202363_MD_SALIVA,40773	K.AYYELSVTSTTMTK.S	1594.77	0.00556	2	1	73.43	0	4.54e-09	0|0	tr|K0D9J4|K0D9J4_9HEMI		6.04	0		0	2	MASCOT		T
164		P20191202363_MD_SALIVA,41047	K.AYYELSVTSTTMTK.S	1594.77	-0.00228	2	1	77.8	0	1.66e-09	0|0	tr|K0D9J4|K0D9J4_9HEMI		6.04	0		0	2	MASCOT		T
165		P20191202363_MD_SALIVA,41286	K.AYYELSVTSTTMTK.S	1594.77	0.00018	2	1	87.25	0	1.88e-10	0|0	tr|K0D9J4|K0D9J4_9HEMI		6.04	0		0	2	MASCOT		T
166		P20191202363_MD_SALIVA,41518	K.AYYELSVTSTTMTK.S	1594.77	0.00175	2	1	72.25	0	5.96e-09	0|0	tr|K0D9J4|K0D9J4_9HEMI		6.04	0		0	2	MASCOT		T
167		P20191202363_MD_SALIVA,41746	K.AYYELSVTSTTMTK.S	1594.77	0.00016	2	1	71.44	0	7.18e-09	0|0	tr|K0D9J4|K0D9J4_9HEMI		6.04	0		0	2	MASCOT		T
168		P20191202363_MD_SALIVA,41974	K.AYYELSVTSTTMTK.S	1594.77	0.00232	2	1	68.84	0	1.31e-08	0|0	tr|K0D9J4|K0D9J4_9HEMI		6.04	0		0	2	MASCOT		T
169		P20191202363_MD_SALIVA,42200	K.AYYELSVTSTTMTK.S	1594.77	-0.00144	2	1	81.17	0	7.64e-10	0|0	tr|K0D9J4|K0D9J4_9HEMI		6.04	0		0	2	MASCOT		T
170		P20191202363_MD_SALIVA,42430	K.AYYELSVTSTTMTK.S	1594.77	-0.00041	2	1	74.73	0	3.37e-09	0|0	tr|K0D9J4|K0D9J4_9HEMI		6.04	0		0	2	MASCOT		T
171		P20191202363_MD_SALIVA,42659	K.AYYELSVTSTTMTK.S	1594.77	0.00754	2	1	71.25	0	7.5e-09	0|0	tr|K0D9J4|K0D9J4_9HEMI		6.04	0		0	2	MASCOT		T
172		P20191202363_MD_SALIVA,42884	K.AYYELSVTSTTMTK.S	1594.77	0.001	2	1	63.3	0	4.68e-08	0|0	tr|K0D9J4|K0D9J4_9HEMI		6.04	0		0	2	MASCOT		T
173		P20191202363_MD_SALIVA,43114	K.AYYELSVTSTTMTK.S	1594.77	0.00082	2	1	70.98	0	7.98e-09	0|0	tr|K0D9J4|K0D9J4_9HEMI		6.04	0		0	2	MASCOT		T
174		P20191202363_MD_SALIVA,43346	K.AYYELSVTSTTMTK.S	1594.77	0.00016	2	1	73.15	0	4.84e-09	0|0	tr|K0D9J4|K0D9J4_9HEMI		6.04	0		0	2	MASCOT		T
175		P20191202363_MD_SALIVA,43577	K.AYYELSVTSTTMTK.S	1594.77	-0.00033	2	1	73.15	0	4.84e-09	0|0	tr|K0D9J4|K0D9J4_9HEMI		6.04	0		0	2	MASCOT		T
176		P20191202363_MD_SALIVA,43791	K.AYYELSVTSTTMTK.S	1594.77	0.00666	2	1	82.95	0	5.07e-10	0|0	tr|K0D9J4|K0D9J4_9HEMI		6.04	0		0	2	MASCOT		T
177		P20191202363_MD_SALIVA,44013	K.AYYELSVTSTTMTK.S	1594.77	0.00041	2	1	72.24	0	5.97e-09	0|0	tr|K0D9J4|K0D9J4_9HEMI		6.04	0		0	2	MASCOT		T
178		P20191202363_MD_SALIVA,44240	K.AYYELSVTSTTMTK.S	1594.77	0.00144	2	1	83.5	0	4.47e-10	0|0	tr|K0D9J4|K0D9J4_9HEMI		6.04	0		0	2	MASCOT		T
179		P20191202363_MD_SALIVA,44464	K.AYYELSVTSTTMTK.S	1594.77	0.00028	2	1	80.37	0	9.18e-10	0|0	tr|K0D9J4|K0D9J4_9HEMI		6.04	0		0	2	MASCOT		T
180		P20191202363_MD_SALIVA,44694	K.AYYELSVTSTTMTK.S	1594.77	0.0007	2	1	98.01	0	1.58e-11	0|0	tr|K0D9J4|K0D9J4_9HEMI		6.04	0		0	2	MASCOT		T
181		P20191202363_MD_SALIVA,44926	K.AYYELSVTSTTMTK.S	1594.77	0.00122	2	1	95.92	0	2.56e-11	0|0	tr|K0D9J4|K0D9J4_9HEMI		6.04	0		0	2	MASCOT		T
182		P20191202363_MD_SALIVA,45157	K.AYYELSVTSTTMTK.S	1594.77	0.00144	2	1	81.99	0	6.32e-10	0|0	tr|K0D9J4|K0D9J4_9HEMI		6.04	0		0	2	MASCOT		T
183		P20191202363_MD_SALIVA,45388	K.AYYELSVTSTTMTK.S	1594.77	0.00139	2	1	50.14	0	9.68e-07	0|0	tr|K0D9J4|K0D9J4_9HEMI		6.04	0		0	2	MASCOT		T
184		P20191202363_MD_SALIVA,45601	K.AYYELSVTSTTMTK.S	1594.77	0.00121	2	1	83.23	0	4.75e-10	0|0	tr|K0D9J4|K0D9J4_9HEMI		6.04	0		0	2	MASCOT		T
185		P20191202363_MD_SALIVA,45821	K.AYYELSVTSTTMTK.S	1594.77	6e-05	2	1	83.15	0	4.84e-10	0|0	tr|K0D9J4|K0D9J4_9HEMI		6.04	0		0	2	MASCOT		T
186		P20191202363_MD_SALIVA,46039	K.AYYELSVTSTTMTK.S	1594.77	-0.00036	2	1	65.6	0	2.75e-08	0|0	tr|K0D9J4|K0D9J4_9HEMI		6.04	0		0	2	MASCOT		T
187		P20191202363_MD_SALIVA,46270	K.AYYELSVTSTTMTK.S	1594.77	0.00018	2	1	65.78	0	2.64e-08	0|0	tr|K0D9J4|K0D9J4_9HEMI		6.04	0		0	2	MASCOT		T
188		P20191202363_MD_SALIVA,46500	K.AYYELSVTSTTMTK.S	1594.77	-5e-05	2	1	86.78	0	2.1e-10	0|0	tr|K0D9J4|K0D9J4_9HEMI		6.04	0		0	2	MASCOT		T
189		P20191202363_MD_SALIVA,46722	K.AYYELSVTSTTMTK.S	1594.77	-0.00072	2	1	95.8	0	2.63e-11	0|0	tr|K0D9J4|K0D9J4_9HEMI		6.04	0		0	2	MASCOT		T
190		P20191202363_MD_SALIVA,47004	K.AYYELSVTSTTMTK.S	1594.77	0.00378	2	1	89.6	0	1.1e-10	0|0	tr|K0D9J4|K0D9J4_9HEMI		6.04	0		0	2	MASCOT		T
191		P20191202363_MD_SALIVA,47232	K.AYYELSVTSTTMTK.S	1594.77	0.00041	2	1	61.4	0	7.24e-08	0|0	tr|K0D9J4|K0D9J4_9HEMI		6.04	0		0	2	MASCOT		T
192		P20191202363_MD_SALIVA,47463	K.AYYELSVTSTTMTK.S	1594.77	-0.00058	2	1	77.26	0	1.88e-09	0|0	tr|K0D9J4|K0D9J4_9HEMI		6.04	0		0	2	MASCOT		T
193		P20191202363_MD_SALIVA,47694	K.AYYELSVTSTTMTK.S	1594.77	-0.00104	2	1	75.92	0	2.56e-09	0|0	tr|K0D9J4|K0D9J4_9HEMI		6.04	0		0	2	MASCOT		T
194		P20191202363_MD_SALIVA,47921	K.AYYELSVTSTTMTK.S	1594.77	-0.00102	2	1	71.28	0	7.45e-09	0|0	tr|K0D9J4|K0D9J4_9HEMI		6.04	0		0	2	MASCOT		T
195		P20191202363_MD_SALIVA,48154	K.AYYELSVTSTTMTK.S	1594.77	-0.00104	2	1	82.4	0	5.75e-10	0|0	tr|K0D9J4|K0D9J4_9HEMI		6.04	0		0	2	MASCOT		T
196		P20191202363_MD_SALIVA,48380	K.AYYELSVTSTTMTK.S	1594.77	-0.0005	2	1	70.06	0	9.86e-09	0|0	tr|K0D9J4|K0D9J4_9HEMI		6.04	0		0	2	MASCOT		T
197		P20191202363_MD_SALIVA,48614	K.AYYELSVTSTTMTK.S	1594.77	-0.00012	2	1	75.88	0	2.58e-09	0|0	tr|K0D9J4|K0D9J4_9HEMI		6.04	0		0	2	MASCOT		T
198		P20191202363_MD_SALIVA,48834	K.AYYELSVTSTTMTK.S	1594.77	0.00088	2	1	53.56	0	4.41e-07	0|0	tr|K0D9J4|K0D9J4_9HEMI		6.04	0		0	2	MASCOT		T
199		P20191202363_MD_SALIVA,49060	K.AYYELSVTSTTMTK.S	1594.77	-0.00064	2	1	56.23	0	2.38e-07	0|0	tr|K0D9J4|K0D9J4_9HEMI		6.04	0		0	2	MASCOT		T
200		P20191202363_MD_SALIVA,49289	K.AYYELSVTSTTMTK.S	1594.77	0.00013	2	1	84.52	0	3.53e-10	0|0	tr|K0D9J4|K0D9J4_9HEMI		6.04	0		0	2	MASCOT		T
201		P20191202363_MD_SALIVA,49513	K.AYYELSVTSTTMTK.S	1594.77	0.00052	2	1	90.53	0	8.85e-11	0|0	tr|K0D9J4|K0D9J4_9HEMI		6.04	0		0	2	MASCOT		T
202		P20191202363_MD_SALIVA,49731	K.AYYELSVTSTTMTK.S	1594.77	0.00129	2	1	51.39	0	7.26e-07	0|0	tr|K0D9J4|K0D9J4_9HEMI		6.04	0		0	2	MASCOT		T
203		P20191202363_MD_SALIVA,49941	K.AYYELSVTSTTMTK.S	1594.77	-0.00084	2	1	75.89	0	2.58e-09	0|0	tr|K0D9J4|K0D9J4_9HEMI		6.04	0		0	2	MASCOT		T
204		P20191202363_MD_SALIVA,50157	K.AYYELSVTSTTMTK.S	1594.77	5e-05	2	1	59.19	0	1.21e-07	0|0	tr|K0D9J4|K0D9J4_9HEMI		6.04	0		0	2	MASCOT		T
205		P20191202363_MD_SALIVA,50371	K.AYYELSVTSTTMTK.S	1594.77	-0.00036	2	1	62.18	0	6.05e-08	0|0	tr|K0D9J4|K0D9J4_9HEMI		6.04	0		0	2	MASCOT		T
206		P20191202363_MD_SALIVA,50593	K.AYYELSVTSTTMTK.S	1594.77	-0.00082	2	1	72.55	0	5.56e-09	0|0	tr|K0D9J4|K0D9J4_9HEMI		6.04	0		0	2	MASCOT		T
207		P20191202363_MD_SALIVA,50595	K.AYYELSVTSTTMTK.S	1594.77	0.00106	2	1	86.11	0	2.45e-10	0|0	tr|K0D9J4|K0D9J4_9HEMI		6.04	0		0	2	MASCOT		T
208		P20191202363_MD_SALIVA,50815	K.AYYELSVTSTTMTK.S	1594.77	-0.00054	2	1	80.19	0	9.57e-10	0|0	tr|K0D9J4|K0D9J4_9HEMI		6.04	0		0	2	MASCOT		T
209		P20191202363_MD_SALIVA,51040	K.AYYELSVTSTTMTK.S	1594.77	-4e-05	2	1	85.64	0	2.73e-10	0|0	tr|K0D9J4|K0D9J4_9HEMI		6.04	0		0	2	MASCOT		T
210		P20191202363_MD_SALIVA,51269	K.AYYELSVTSTTMTK.S	1594.77	0.00064	2	1	84.28	0	3.73e-10	0|0	tr|K0D9J4|K0D9J4_9HEMI		6.04	0		0	2	MASCOT		T
211		P20191202363_MD_SALIVA,51500	K.AYYELSVTSTTMTK.S	1594.77	0.00114	2	1	84.24	0	3.77e-10	0|0	tr|K0D9J4|K0D9J4_9HEMI		6.04	0		0	2	MASCOT		T
212		P20191202363_MD_SALIVA,51714	K.AYYELSVTSTTMTK.S	1594.77	-0.00094	2	1	78.18	0	1.52e-09	0|0	tr|K0D9J4|K0D9J4_9HEMI		6.04	0		0	2	MASCOT		T
213		P20191202363_MD_SALIVA,51920	K.AYYELSVTSTTMTK.S	1594.77	-0.00038	2	1	80.99	0	7.96e-10	0|0	tr|K0D9J4|K0D9J4_9HEMI		6.04	0		0	2	MASCOT		T
214		P20191202363_MD_SALIVA,52128	K.AYYELSVTSTTMTK.S	1594.77	0.0005	2	1	78.46	0	1.43e-09	0|0	tr|K0D9J4|K0D9J4_9HEMI		6.04	0		0	2	MASCOT		T
215		P20191202363_MD_SALIVA,52331	K.AYYELSVTSTTMTK.S	1594.77	-0.0001	2	1	76.1	0	2.45e-09	0|0	tr|K0D9J4|K0D9J4_9HEMI		6.04	0		0	2	MASCOT		T
216		P20191202363_MD_SALIVA,4709	K.DCSCNLPK.I	993.413	0.00058	2	1	21.31	0	0.00037	0|0	tr|K0D9J4|K0D9J4_9HEMI		5.82	0		0	2	MASCOT		T
217		P20191202363_MD_SALIVA,31444	K.DNDYLILSIANR.Y	1406.73	0.0011	2	1	56.6	0	1.09e-07	0|0	tr|K0D9J4|K0D9J4_9HEMI		4.21	0		0	2	MASCOT		T
218		P20191202363_MD_SALIVA,31942	K.DNDYLILSIANR.Y	1406.73	0.0029	2	1	70.88	0	4.08e-09	0|0	tr|K0D9J4|K0D9J4_9HEMI		4.21	0		0	2	MASCOT		T
219		P20191202363_MD_SALIVA,31965	K.DNDYLILSIANR.Y	1406.73	0.00071	3	1	36.65	0	1.08e-05	0|0	tr|K0D9J4|K0D9J4_9HEMI		4.21	0		0	2	MASCOT		T
220		P20191202363_MD_SALIVA,32171	K.DNDYLILSIANR.Y	1406.73	-0.00028	2	1	80.69	0	4.27e-10	0|0	tr|K0D9J4|K0D9J4_9HEMI		4.21	0		0	2	MASCOT		T
221		P20191202363_MD_SALIVA,32404	K.DNDYLILSIANR.Y	1406.73	0.00168	2	1	68.02	0	7.89e-09	0|0	tr|K0D9J4|K0D9J4_9HEMI		4.21	0		0	2	MASCOT		T
222		P20191202363_MD_SALIVA,32930	K.DNDYLILSIANR.Y	1406.73	0.0013	2	1	41.4	0	3.62e-06	0|0	tr|K0D9J4|K0D9J4_9HEMI		4.21	0		0	2	MASCOT		T
223		P20191202363_MD_SALIVA,33940	K.DNDYLILSIANR.Y	1406.73	0.00182	2	1	67.32	0	9.27e-09	0|0	tr|K0D9J4|K0D9J4_9HEMI		4.21	0		0	2	MASCOT		T
224		P20191202363_MD_SALIVA,34169	K.DNDYLILSIANR.Y	1406.73	0.00088	2	1	41.23	0	3.77e-06	0|0	tr|K0D9J4|K0D9J4_9HEMI		4.21	0		0	2	MASCOT		T
225		P20191202363_MD_SALIVA,34400	K.DNDYLILSIANR.Y	1406.73	0.00094	2	1	55.22	0	1.5e-07	0|0	tr|K0D9J4|K0D9J4_9HEMI		4.21	0		0	2	MASCOT		T
226		P20191202363_MD_SALIVA,8624	K.ICPSTWK.I	891.439	-0.00171	2	1	32.9	0	2.56e-05	0|0	tr|K0D9J4|K0D9J4_9HEMI		8.22	0		0	2	MASCOT		T
227		P20191202363_MD_SALIVA,8846	K.ICPSTWK.I	891.439	-0.00177	2	1	26.74	0	0.000106	0|0	tr|K0D9J4|K0D9J4_9HEMI		8.22	0		0	2	MASCOT		T
228		P20191202363_MD_SALIVA,9080	K.ICPSTWK.I	891.439	-0.00145	2	1	42.23	0	2.99e-06	0|0	tr|K0D9J4|K0D9J4_9HEMI		8.22	0		0	2	MASCOT		T
229		P20191202363_MD_SALIVA,9345	K.ICPSTWK.I	891.439	0.00017	2	1	24.6	0	0.000173	0|0	tr|K0D9J4|K0D9J4_9HEMI		8.22	0		0	2	MASCOT		T
230		P20191202363_MD_SALIVA,4063	K.KAYEDIER.S	1023.51	-1e-05	2	1	33.6	0	2.18e-05	0|0	tr|K0D9J4|K0D9J4_9HEMI		4.68	1		0	2	MASCOT		T
231		P20191202363_MD_SALIVA,4641	K.KAYEDIER.S	1023.51	0.00079	2	1	23.55	0	0.000442	0|0	tr|K0D9J4|K0D9J4_9HEMI		4.68	1		0	2	MASCOT		T
232		P20191202363_MD_SALIVA,14880	K.NELIFK.D	763.435	0.00134	2	1	48.31	0	7.38e-07	0|0	tr|K0D9J4|K0D9J4_9HEMI		6	0		0	2	MASCOT		T
233		P20191202363_MD_SALIVA,15059	K.NELIFK.D	763.435	0.00054	2	1	28.84	0	6.53e-05	0|0	tr|K0D9J4|K0D9J4_9HEMI		6	0		0	2	MASCOT		T
234		P20191202363_MD_SALIVA,15265	K.NELIFK.D	763.435	0.00066	2	1	35.59	0	1.38e-05	0|0	tr|K0D9J4|K0D9J4_9HEMI		6	0		0	2	MASCOT		T
235		P20191202363_MD_SALIVA,15521	K.NELIFK.D	763.435	0.00034	2	1	31.64	0	3.43e-05	0|0	tr|K0D9J4|K0D9J4_9HEMI		6	0		0	2	MASCOT		T
236		P20191202363_MD_SALIVA,16090	K.NELIFK.D	763.435	0.0007	2	1	48.89	0	6.46e-07	0|0	tr|K0D9J4|K0D9J4_9HEMI		6	0		0	2	MASCOT		T
237		P20191202363_MD_SALIVA,16338	K.NELIFK.D	763.435	0.00066	2	1	35.06	0	1.56e-05	0|0	tr|K0D9J4|K0D9J4_9HEMI		6	0		0	2	MASCOT		T
238		P20191202363_MD_SALIVA,16639	K.NELIFK.D	763.435	0.0009	2	1	21.17	0	0.000382	0|0	tr|K0D9J4|K0D9J4_9HEMI		6	0		0	2	MASCOT		T
239		P20191202363_MD_SALIVA,17435	K.NELIFK.D	763.435	0.00042	2	1	21.32	0	0.000369	0|0	tr|K0D9J4|K0D9J4_9HEMI		6	0		0	2	MASCOT		T
240		P20191202363_MD_SALIVA,17678	K.NELIFK.D	763.435	0.00132	2	1	31.35	0	3.66e-05	0|0	tr|K0D9J4|K0D9J4_9HEMI		6	0		0	2	MASCOT		T
241		P20191202363_MD_SALIVA,18313	K.NELIFK.D	763.435	0.00032	2	1	21.38	0	0.000364	0|0	tr|K0D9J4|K0D9J4_9HEMI		6	0		0	2	MASCOT		T
242		P20191202363_MD_SALIVA,18755	K.NELIFK.D	763.435	0.00032	2	1	31.33	0	3.68e-05	0|0	tr|K0D9J4|K0D9J4_9HEMI		6	0		0	2	MASCOT		T
243		P20191202363_MD_SALIVA,20354	K.NELIFK.D	763.435	0.00052	2	1	32.01	0	3.15e-05	0|0	tr|K0D9J4|K0D9J4_9HEMI		6	0		0	2	MASCOT		T
244		P20191202363_MD_SALIVA,20671	K.NELIFK.D	763.435	0.00074	2	1	28.19	0	7.59e-05	0|0	tr|K0D9J4|K0D9J4_9HEMI		6	0		0	2	MASCOT		T
245		P20191202363_MD_SALIVA,21949	K.NELIFK.D	763.435	-8e-05	2	1	31.3	0	3.71e-05	0|0	tr|K0D9J4|K0D9J4_9HEMI		6	0		0	2	MASCOT		T
246		P20191202363_MD_SALIVA,24267	K.NELIFK.D	763.435	0.001	2	1	29.07	0	6.19e-05	0|0	tr|K0D9J4|K0D9J4_9HEMI		6	0		0	2	MASCOT		T
247		P20191202363_MD_SALIVA,41393	K.NELIFK.D	763.435	0.00036	2	1	25.1	0	0.000155	0|0	tr|K0D9J4|K0D9J4_9HEMI		6	0		0	2	MASCOT		T
248		P20191202363_MD_SALIVA,42149	K.NELIFK.D	763.435	0.00064	2	1	23.84	0	0.000207	0|0	tr|K0D9J4|K0D9J4_9HEMI		6	0		0	2	MASCOT		T
249		P20191202363_MD_SALIVA,44717	K.NELIFK.D	763.435	0.0003	2	1	27.2	0	9.53e-05	0|0	tr|K0D9J4|K0D9J4_9HEMI		6	0		0	2	MASCOT		T
250		P20191202363_MD_SALIVA,45593	K.NELIFK.D	763.435	0.00012	2	1	21.74	0	0.000335	0|0	tr|K0D9J4|K0D9J4_9HEMI		6	0		0	2	MASCOT		T
251		P20191202363_MD_SALIVA,45835	K.NELIFK.D	763.435	0.00032	2	1	24.39	0	0.000182	0|0	tr|K0D9J4|K0D9J4_9HEMI		6	0		0	2	MASCOT		T
252		P20191202363_MD_SALIVA,46295	K.NELIFK.D	763.435	-0.0006	2	1	20.06	0	0.000493	0|0	tr|K0D9J4|K0D9J4_9HEMI		6	0		0	2	MASCOT		T
253		P20191202363_MD_SALIVA,47526	K.NELIFK.D	763.435	-0.00022	2	1	24.29	0	0.000186	0|0	tr|K0D9J4|K0D9J4_9HEMI		6	0		0	2	MASCOT		T
254		P20191202363_MD_SALIVA,47761	K.NELIFK.D	763.435	-0.00048	2	1	24.53	0	0.000176	0|0	tr|K0D9J4|K0D9J4_9HEMI		6	0		0	2	MASCOT		T
255		P20191202363_MD_SALIVA,48646	K.NELIFK.D	763.435	0.00012	2	1	24.2	0	0.00019	0|0	tr|K0D9J4|K0D9J4_9HEMI		6	0		0	2	MASCOT		T
256		P20191202363_MD_SALIVA,48873	K.NELIFK.D	763.435	-0.0005	2	1	22	0	0.000315	0|0	tr|K0D9J4|K0D9J4_9HEMI		6	0		0	2	MASCOT		T
257		P20191202363_MD_SALIVA,49113	K.NELIFK.D	763.435	-0.00028	2	1	23.11	0	0.000244	0|0	tr|K0D9J4|K0D9J4_9HEMI		6	0		0	2	MASCOT		T
258		P20191202363_MD_SALIVA,49330	K.NELIFK.D	763.435	0.00032	2	1	20.57	0	0.000439	0|0	tr|K0D9J4|K0D9J4_9HEMI		6	0		0	2	MASCOT		T
259		P20191202363_MD_SALIVA,49562	K.NELIFK.D	763.435	-0.00022	2	1	29.18	0	6.04e-05	0|0	tr|K0D9J4|K0D9J4_9HEMI		6	0		0	2	MASCOT		T
260		P20191202363_MD_SALIVA,50002	K.NELIFK.D	763.435	-0.00018	2	1	29.18	0	6.04e-05	0|0	tr|K0D9J4|K0D9J4_9HEMI		6	0		0	2	MASCOT		T
261		P20191202363_MD_SALIVA,3905	K.NLDKPTIK.K	928.546	-0.00074	2	1	21.54	0	0.000351	0|0	tr|K0D9J4|K0D9J4_9HEMI		8.59	0		0	2	MASCOT		T
262		P20191202363_MD_SALIVA,4350	K.NLDKPTIK.K	928.546	-0.00092	2	1	23.86	0	0.000206	0|0	tr|K0D9J4|K0D9J4_9HEMI		8.59	0		0	2	MASCOT		T
263		P20191202363_MD_SALIVA,6262	K.NLDKPTIK.K	928.546	-0.00016	2	1	29.54	0	5.56e-05	0|0	tr|K0D9J4|K0D9J4_9HEMI		8.59	0		0	2	MASCOT		T
264		P20191202363_MD_SALIVA,29205	K.NPFIDQDLFR.H	1264.63	0.00258	2	1	40.21	0	9.53e-06	0|0	tr|K0D9J4|K0D9J4_9HEMI		4.21	0		0	2	MASCOT		T
265		P20191202363_MD_SALIVA,29754	K.NPFIDQDLFR.H	1264.63	0.00128	2	1	43.24	0	4.74e-06	0|0	tr|K0D9J4|K0D9J4_9HEMI		4.21	0		0	2	MASCOT		T
266		P20191202363_MD_SALIVA,30046	K.NPFIDQDLFR.H	1264.63	0.00174	2	1	43.36	0	4.61e-06	0|0	tr|K0D9J4|K0D9J4_9HEMI		4.21	0		0	2	MASCOT		T
267		P20191202363_MD_SALIVA,30258	K.NPFIDQDLFR.H	1264.63	0.0005	2	1	45.94	0	2.55e-06	0|0	tr|K0D9J4|K0D9J4_9HEMI		4.21	0		0	2	MASCOT		T
268		P20191202363_MD_SALIVA,30491	K.NPFIDQDLFR.H	1264.63	0.0018	2	1	46.99	0	2e-06	0|0	tr|K0D9J4|K0D9J4_9HEMI		4.21	0		0	2	MASCOT		T
269		P20191202363_MD_SALIVA,30725	K.NPFIDQDLFR.H	1264.63	0.00166	2	1	45.63	0	2.74e-06	0|0	tr|K0D9J4|K0D9J4_9HEMI		4.21	0		0	2	MASCOT		T
270		P20191202363_MD_SALIVA,30957	K.NPFIDQDLFR.H	1264.63	-0.00078	2	1	49.51	0	1.12e-06	0|0	tr|K0D9J4|K0D9J4_9HEMI		4.21	0		0	2	MASCOT		T
271		P20191202363_MD_SALIVA,31185	K.NPFIDQDLFR.H	1264.63	-0.001	2	1	46.14	0	2.43e-06	0|0	tr|K0D9J4|K0D9J4_9HEMI		4.21	0		0	2	MASCOT		T
272		P20191202363_MD_SALIVA,31416	K.NPFIDQDLFR.H	1264.63	0.00074	2	1	39.55	0	1.11e-05	0|0	tr|K0D9J4|K0D9J4_9HEMI		4.21	0		0	2	MASCOT		T
273		P20191202363_MD_SALIVA,31983	K.NPFIDQDLFR.H	1264.63	0.00204	2	1	46.94	0	2.02e-06	0|0	tr|K0D9J4|K0D9J4_9HEMI		4.21	0		0	2	MASCOT		T
274		P20191202363_MD_SALIVA,32469	K.NPFIDQDLFR.H	1264.63	-0.0001	2	1	49.75	0	1.06e-06	0|0	tr|K0D9J4|K0D9J4_9HEMI		4.21	0		0	2	MASCOT		T
275		P20191202363_MD_SALIVA,32925	K.NPFIDQDLFR.H	1264.63	0.00432	2	1	31.62	0	6.89e-05	0|0	tr|K0D9J4|K0D9J4_9HEMI		4.21	0		0	2	MASCOT		T
276		P20191202363_MD_SALIVA,33334	K.NPFIDQDLFR.H	1264.63	0.0037	2	1	45.43	0	2.86e-06	0|0	tr|K0D9J4|K0D9J4_9HEMI		4.21	0		0	2	MASCOT		T
277		P20191202363_MD_SALIVA,33556	K.NPFIDQDLFR.H	1264.63	0.00374	2	1	62.79	0	5.26e-08	0|0	tr|K0D9J4|K0D9J4_9HEMI		4.21	0		0	2	MASCOT		T
278		P20191202363_MD_SALIVA,33964	K.NPFIDQDLFR.H	1264.63	0.00086	2	1	43.98	0	4e-06	0|0	tr|K0D9J4|K0D9J4_9HEMI		4.21	0		0	2	MASCOT		T
279		P20191202363_MD_SALIVA,34204	K.NPFIDQDLFR.H	1264.63	0.00014	2	1	38.14	0	1.53e-05	0|0	tr|K0D9J4|K0D9J4_9HEMI		4.21	0		0	2	MASCOT		T
280		P20191202363_MD_SALIVA,36338	K.NPFIDQDLFR.H	1264.63	-0.00146	2	1	37.43	0	1.81e-05	0|0	tr|K0D9J4|K0D9J4_9HEMI		4.21	0		0	2	MASCOT		T
281		P20191202363_MD_SALIVA,36989	K.NPFIDQDLFR.H	1264.63	-0.00086	2	1	33.21	0	4.78e-05	0|0	tr|K0D9J4|K0D9J4_9HEMI		4.21	0		0	2	MASCOT		T
282		P20191202363_MD_SALIVA,37219	K.NPFIDQDLFR.H	1264.63	0.00062	2	1	34.42	0	3.61e-05	0|0	tr|K0D9J4|K0D9J4_9HEMI		4.21	0		0	2	MASCOT		T
283		P20191202363_MD_SALIVA,38155	K.NPFIDQDLFR.H	1264.63	-0.00026	2	1	31.79	0	6.62e-05	0|0	tr|K0D9J4|K0D9J4_9HEMI		4.21	0		0	2	MASCOT		T
284		P20191202363_MD_SALIVA,38400	K.NPFIDQDLFR.H	1264.63	-0.00026	2	1	34.62	0	3.45e-05	0|0	tr|K0D9J4|K0D9J4_9HEMI		4.21	0		0	2	MASCOT		T
285		P20191202363_MD_SALIVA,38765	K.NPFIDQDLFR.H	1264.63	-0.00186	2	1	32.94	0	5.08e-05	0|0	tr|K0D9J4|K0D9J4_9HEMI		4.21	0		0	2	MASCOT		T
286		P20191202363_MD_SALIVA,39349	K.NPFIDQDLFR.H	1264.63	0.00174	2	1	53.66	0	4.31e-07	0|0	tr|K0D9J4|K0D9J4_9HEMI		4.21	0		0	2	MASCOT		T
287		P20191202363_MD_SALIVA,39770	K.NPFIDQDLFR.H	1264.63	-0.00306	2	1	50.18	0	9.59e-07	0|0	tr|K0D9J4|K0D9J4_9HEMI		4.21	0		0	2	MASCOT		T
288		P20191202363_MD_SALIVA,40019	K.NPFIDQDLFR.H	1264.63	0.00258	2	1	43.5	0	4.47e-06	0|0	tr|K0D9J4|K0D9J4_9HEMI		4.21	0		0	2	MASCOT		T
289		P20191202363_MD_SALIVA,40313	K.NPFIDQDLFR.H	1264.63	-0.0011	2	1	35.65	0	2.72e-05	0|0	tr|K0D9J4|K0D9J4_9HEMI		4.21	0		0	2	MASCOT		T
290		P20191202363_MD_SALIVA,40736	K.NPFIDQDLFR.H	1264.63	0.00356	2	1	22.51	0	0.000561	0|0	tr|K0D9J4|K0D9J4_9HEMI		4.21	0		0	2	MASCOT		T
291		P20191202363_MD_SALIVA,40962	K.NPFIDQDLFR.H	1264.63	-0.0033	2	1	40.32	0	9.29e-06	0|0	tr|K0D9J4|K0D9J4_9HEMI		4.21	0		0	2	MASCOT		T
292		P20191202363_MD_SALIVA,41332	K.NPFIDQDLFR.H	1264.63	-0.00018	2	1	37.85	0	1.64e-05	0|0	tr|K0D9J4|K0D9J4_9HEMI		4.21	0		0	2	MASCOT		T
293		P20191202363_MD_SALIVA,41558	K.NPFIDQDLFR.H	1264.63	-0.00056	2	1	38.77	0	1.33e-05	0|0	tr|K0D9J4|K0D9J4_9HEMI		4.21	0		0	2	MASCOT		T
294		P20191202363_MD_SALIVA,42162	K.NPFIDQDLFR.H	1264.63	-0.00294	2	1	45.89	0	2.58e-06	0|0	tr|K0D9J4|K0D9J4_9HEMI		4.21	0		0	2	MASCOT		T
295		P20191202363_MD_SALIVA,42390	K.NPFIDQDLFR.H	1264.63	-0.00022	2	1	30.37	0	9.18e-05	0|0	tr|K0D9J4|K0D9J4_9HEMI		4.21	0		0	2	MASCOT		T
296		P20191202363_MD_SALIVA,42612	K.NPFIDQDLFR.H	1264.63	-0.00062	2	1	30.3	0	9.33e-05	0|0	tr|K0D9J4|K0D9J4_9HEMI		4.21	0		0	2	MASCOT		T
297		P20191202363_MD_SALIVA,42842	K.NPFIDQDLFR.H	1264.63	-0.00288	2	1	46.42	0	2.28e-06	0|0	tr|K0D9J4|K0D9J4_9HEMI		4.21	0		0	2	MASCOT		T
298		P20191202363_MD_SALIVA,43178	K.NPFIDQDLFR.H	1264.63	0.00234	2	1	29.6	0	0.00011	0|0	tr|K0D9J4|K0D9J4_9HEMI		4.21	0		0	2	MASCOT		T
299		P20191202363_MD_SALIVA,43413	K.NPFIDQDLFR.H	1264.63	0.00014	2	1	40.5	0	8.91e-06	0|0	tr|K0D9J4|K0D9J4_9HEMI		4.21	0		0	2	MASCOT		T
300		P20191202363_MD_SALIVA,43642	K.NPFIDQDLFR.H	1264.63	0.00138	2	1	31.64	0	6.85e-05	0|0	tr|K0D9J4|K0D9J4_9HEMI		4.21	0		0	2	MASCOT		T
301		P20191202363_MD_SALIVA,43866	K.NPFIDQDLFR.H	1264.63	0.00102	2	1	24.23	0	0.000378	0|0	tr|K0D9J4|K0D9J4_9HEMI		4.21	0		0	2	MASCOT		T
302		P20191202363_MD_SALIVA,44317	K.NPFIDQDLFR.H	1264.63	0.00054	2	1	38.77	0	1.33e-05	0|0	tr|K0D9J4|K0D9J4_9HEMI		4.21	0		0	2	MASCOT		T
303		P20191202363_MD_SALIVA,44547	K.NPFIDQDLFR.H	1264.63	0.00168	2	1	25.58	0	0.000277	0|0	tr|K0D9J4|K0D9J4_9HEMI		4.21	0		0	2	MASCOT		T
304		P20191202363_MD_SALIVA,44801	K.NPFIDQDLFR.H	1264.63	-0.00026	2	1	47.85	0	1.64e-06	0|0	tr|K0D9J4|K0D9J4_9HEMI		4.21	0		0	2	MASCOT		T
305		P20191202363_MD_SALIVA,45034	K.NPFIDQDLFR.H	1264.63	0.0011	2	1	21.84	0	0.000655	0|0	tr|K0D9J4|K0D9J4_9HEMI		4.21	0		0	2	MASCOT		T
306		P20191202363_MD_SALIVA,45266	K.NPFIDQDLFR.H	1264.63	0.00364	2	1	35.1	0	3.09e-05	0|0	tr|K0D9J4|K0D9J4_9HEMI		4.21	0		0	2	MASCOT		T
307		P20191202363_MD_SALIVA,45483	K.NPFIDQDLFR.H	1264.63	0.00058	2	1	32.03	0	6.27e-05	0|0	tr|K0D9J4|K0D9J4_9HEMI		4.21	0		0	2	MASCOT		T
308		P20191202363_MD_SALIVA,45703	K.NPFIDQDLFR.H	1264.63	0.00034	2	1	24.79	0	0.000332	0|0	tr|K0D9J4|K0D9J4_9HEMI		4.21	0		0	2	MASCOT		T
309		P20191202363_MD_SALIVA,45936	K.NPFIDQDLFR.H	1264.63	0.00058	2	1	41.03	0	7.89e-06	0|0	tr|K0D9J4|K0D9J4_9HEMI		4.21	0		0	2	MASCOT		T
310		P20191202363_MD_SALIVA,46165	K.NPFIDQDLFR.H	1264.63	0.00112	2	1	36.78	0	2.1e-05	0|0	tr|K0D9J4|K0D9J4_9HEMI		4.21	0		0	2	MASCOT		T
311		P20191202363_MD_SALIVA,46652	K.NPFIDQDLFR.H	1264.63	0.00014	2	1	22.46	0	0.000568	0|0	tr|K0D9J4|K0D9J4_9HEMI		4.21	0		0	2	MASCOT		T
312		P20191202363_MD_SALIVA,46870	K.NPFIDQDLFR.H	1264.63	-0.00142	2	1	34.84	0	3.28e-05	0|0	tr|K0D9J4|K0D9J4_9HEMI		4.21	0		0	2	MASCOT		T
313		P20191202363_MD_SALIVA,47086	K.NPFIDQDLFR.H	1264.63	-0.00044	2	1	21.24	0	0.000752	0|0	tr|K0D9J4|K0D9J4_9HEMI		4.21	0		0	2	MASCOT		T
314		P20191202363_MD_SALIVA,47321	K.NPFIDQDLFR.H	1264.63	4e-05	2	1	32.32	0	5.86e-05	0|0	tr|K0D9J4|K0D9J4_9HEMI		4.21	0		0	2	MASCOT		T
315		P20191202363_MD_SALIVA,47551	K.NPFIDQDLFR.H	1264.63	0.00054	2	1	22.45	0	0.000569	0|0	tr|K0D9J4|K0D9J4_9HEMI		4.21	0		0	2	MASCOT		T
316		P20191202363_MD_SALIVA,47775	K.NPFIDQDLFR.H	1264.63	0.00046	2	1	22.15	0	0.00061	0|0	tr|K0D9J4|K0D9J4_9HEMI		4.21	0		0	2	MASCOT		T
317		P20191202363_MD_SALIVA,48001	K.NPFIDQDLFR.H	1264.63	0.00102	2	1	40.09	0	9.79e-06	0|0	tr|K0D9J4|K0D9J4_9HEMI		4.21	0		0	2	MASCOT		T
318		P20191202363_MD_SALIVA,48322	K.NPFIDQDLFR.H	1264.63	0.00082	2	1	33	0	5.01e-05	0|0	tr|K0D9J4|K0D9J4_9HEMI		4.21	0		0	2	MASCOT		T
319		P20191202363_MD_SALIVA,48778	K.NPFIDQDLFR.H	1264.63	0.0011	2	1	39.26	0	1.19e-05	0|0	tr|K0D9J4|K0D9J4_9HEMI		4.21	0		0	2	MASCOT		T
320		P20191202363_MD_SALIVA,49212	K.NPFIDQDLFR.H	1264.63	-0.00134	2	1	42.34	0	5.83e-06	0|0	tr|K0D9J4|K0D9J4_9HEMI		4.21	0		0	2	MASCOT		T
321		P20191202363_MD_SALIVA,49473	K.NPFIDQDLFR.H	1264.63	-0.00022	2	1	29.28	0	0.000118	0|0	tr|K0D9J4|K0D9J4_9HEMI		4.21	0		0	2	MASCOT		T
322		P20191202363_MD_SALIVA,49698	K.NPFIDQDLFR.H	1264.63	0.00074	2	1	22.1	0	0.000617	0|0	tr|K0D9J4|K0D9J4_9HEMI		4.21	0		0	2	MASCOT		T
323		P20191202363_MD_SALIVA,50140	K.NPFIDQDLFR.H	1264.63	0.00084	2	1	36.58	0	2.2e-05	0|0	tr|K0D9J4|K0D9J4_9HEMI		4.21	0		0	2	MASCOT		T
324		P20191202363_MD_SALIVA,50359	K.NPFIDQDLFR.H	1264.63	0.00052	2	1	20.86	0	0.00082	0|0	tr|K0D9J4|K0D9J4_9HEMI		4.21	0		0	2	MASCOT		T
325		P20191202363_MD_SALIVA,12332	K.NPLFPK.K	715.414	0.00092	2	1	26.34	0	0.000116	0|0	tr|K0D9J4|K0D9J4_9HEMI		8.75	0		0	2	MASCOT		T
326		P20191202363_MD_SALIVA,12580	K.NPLFPK.K	715.414	2e-05	2	1	35.23	0	1.5e-05	0|0	tr|K0D9J4|K0D9J4_9HEMI		8.75	0		0	2	MASCOT		T
327		P20191202363_MD_SALIVA,13088	K.NPLFPK.K	715.414	0.0007	2	1	37.96	0	8e-06	0|0	tr|K0D9J4|K0D9J4_9HEMI		8.75	0		0	2	MASCOT		T
328		P20191202363_MD_SALIVA,13340	K.NPLFPK.K	715.414	0.00064	2	1	26.93	0	0.000101	0|0	tr|K0D9J4|K0D9J4_9HEMI		8.75	0		0	2	MASCOT		T
329		P20191202363_MD_SALIVA,16375	K.NPLFPK.K	715.414	0.0004	2	1	29.47	0	5.65e-05	0|0	tr|K0D9J4|K0D9J4_9HEMI		8.75	0		0	2	MASCOT		T
330		P20191202363_MD_SALIVA,18121	K.NPLFPK.K	715.414	0.00072	2	1	53.91	0	2.03e-07	0|0	tr|K0D9J4|K0D9J4_9HEMI		8.75	0		0	2	MASCOT		T
331		P20191202363_MD_SALIVA,28943	K.NQIIASIIGYK.D	1219.7	-2e-05	2	1	64.54	0	1.76e-08	0|0	tr|K0D9J4|K0D9J4_9HEMI		8.59	0		0	2	MASCOT		T
332		P20191202363_MD_SALIVA,29184	K.NQIIASIIGYK.D	1219.7	0.0004	2	1	65.22	0	1.5e-08	0|0	tr|K0D9J4|K0D9J4_9HEMI		8.59	0		0	2	MASCOT		T
333		P20191202363_MD_SALIVA,29418	K.NQIIASIIGYK.D	1219.7	0.00094	2	1	44.01	0	1.99e-06	0|0	tr|K0D9J4|K0D9J4_9HEMI		8.59	0		0	2	MASCOT		T
334		P20191202363_MD_SALIVA,29737	K.NQIIASIIGYK.D	1219.7	-0.00038	2	1	51.11	0	3.87e-07	0|0	tr|K0D9J4|K0D9J4_9HEMI		8.59	0		0	2	MASCOT		T
335		P20191202363_MD_SALIVA,39369	K.NQIIASIIGYKDNDYLILSIANR.Y	2607.41	0.00217	3	1	48.93	0	6.4e-07	0|0	tr|K0D9J4|K0D9J4_9HEMI		5.96	1		0	2	MASCOT		T
336		P20191202363_MD_SALIVA,21061	K.QVPLVYCYTR.E	1298.66	0.00153	2	1	42.13	0	3.06e-06	0|0	tr|K0D9J4|K0D9J4_9HEMI		8.2	0		0	2	MASCOT		T
337		P20191202363_MD_SALIVA,21101	K.QVPLVYCYTR.E	1298.66	0.00161	2	1	46.07	0	1.24e-06	0|0	tr|K0D9J4|K0D9J4_9HEMI		8.2	0		0	2	MASCOT		T
338		P20191202363_MD_SALIVA,33550	K.SPLQGLPSICPQDWDVK.T	1939.96	0.00319	3	1	31.73	0	6.71e-05	0|0	tr|K0D9J4|K0D9J4_9HEMI		4.21	0		0	2	MASCOT		T
339		P20191202363_MD_SALIVA,157	K.STVSTR.G	650.347	-0.00044	2	1	25.04	0	0.000157	0|0	tr|K0D9J4|K0D9J4_9HEMI		9.47	0		0	2	MASCOT		T
340		P20191202363_MD_SALIVA,430	K.STVSTR.G	650.347	-0.00038	2	1	39.31	0	5.86e-06	0|0	tr|K0D9J4|K0D9J4_9HEMI		9.47	0		0	2	MASCOT		T
341		P20191202363_MD_SALIVA,568	K.STVSTR.G	650.347	0.00042	2	1	40.51	0	4.45e-06	0|0	tr|K0D9J4|K0D9J4_9HEMI		9.47	0		0	2	MASCOT		T
342		P20191202363_MD_SALIVA,700	K.STVSTR.G	650.347	0.00018	2	1	26.66	0	0.000108	0|0	tr|K0D9J4|K0D9J4_9HEMI		9.47	0		0	2	MASCOT		T
343		P20191202363_MD_SALIVA,838	K.STVSTR.G	650.347	0.00016	2	1	25.53	0	0.00014	0|0	tr|K0D9J4|K0D9J4_9HEMI		9.47	0		0	2	MASCOT		T
344		P20191202363_MD_SALIVA,979	K.STVSTR.G	650.347	0	2	1	35.95	0	1.27e-05	0|0	tr|K0D9J4|K0D9J4_9HEMI		9.47	0		0	2	MASCOT		T
345		P20191202363_MD_SALIVA,1119	K.STVSTR.G	650.347	4e-05	2	1	28.74	0	6.68e-05	0|0	tr|K0D9J4|K0D9J4_9HEMI		9.47	0		0	2	MASCOT		T
346		P20191202363_MD_SALIVA,1274	K.STVSTR.G	650.347	-0.00088	2	1	49.35	0	5.81e-07	0|0	tr|K0D9J4|K0D9J4_9HEMI		9.47	0		0	2	MASCOT		T
347		P20191202363_MD_SALIVA,1416	K.STVSTR.G	650.347	-0.00146	2	1	35.08	0	1.55e-05	0|0	tr|K0D9J4|K0D9J4_9HEMI		9.47	0		0	2	MASCOT		T
348		P20191202363_MD_SALIVA,1984	K.STVSTR.G	650.347	-0.00118	2	1	27.49	0	8.91e-05	0|0	tr|K0D9J4|K0D9J4_9HEMI		9.47	0		0	2	MASCOT		T
349		P20191202363_MD_SALIVA,2120	K.STVSTR.G	650.347	-0.00146	2	1	27.03	0	9.91e-05	0|0	tr|K0D9J4|K0D9J4_9HEMI		9.47	0		0	2	MASCOT		T
350		P20191202363_MD_SALIVA,2272	K.STVSTR.G	650.347	-6e-05	2	1	26.98	0	0.0001	0|0	tr|K0D9J4|K0D9J4_9HEMI		9.47	0		0	2	MASCOT		T
351		P20191202363_MD_SALIVA,2437	K.STVSTR.G	650.347	-4e-05	2	1	27.87	0	8.17e-05	0|0	tr|K0D9J4|K0D9J4_9HEMI		9.47	0		0	2	MASCOT		T
352		P20191202363_MD_SALIVA,6548	K.STVSTR.G	650.347	-0.00204	2	1	21.43	0	0.00036	0|0	tr|K0D9J4|K0D9J4_9HEMI		9.47	0		0	2	MASCOT		T
353		P20191202363_MD_SALIVA,17882	K.TGLFCNSYPCTK.N	1447.63	0.00217	2	1	43.6	0	2.18e-06	0|0	tr|K0D9J4|K0D9J4_9HEMI		7.72	0		0	2	MASCOT		T
354		P20191202363_MD_SALIVA,18153	K.TGLFCNSYPCTK.N	1447.63	0.00203	2	1	38.04	0	7.85e-06	0|0	tr|K0D9J4|K0D9J4_9HEMI		7.72	0		0	2	MASCOT		T
355		P20191202363_MD_SALIVA,28994	K.YIIWVVTR.D	1049.61	0.0005	2	1	39.4	0	5.74e-06	0|0	tr|K0D9J4|K0D9J4_9HEMI		8.75	0		0	2	MASCOT		T
356		P20191202363_MD_SALIVA,29229	K.YIIWVVTR.D	1049.61	-0.00022	2	1	40.71	0	4.25e-06	0|0	tr|K0D9J4|K0D9J4_9HEMI		8.75	0		0	2	MASCOT		T
357		P20191202363_MD_SALIVA,14727	K.YYTNPIIEK.N	1140.59	0.00074	2	1	32.54	0	2.79e-05	0|0	tr|K0D9J4|K0D9J4_9HEMI		6	0		0	2	MASCOT		T
358		P20191202363_MD_SALIVA,15360	K.YYTNPIIEK.N	1140.59	-0.00031	2	1	22.6	0	0.000275	0|0	tr|K0D9J4|K0D9J4_9HEMI		6	0		0	2	MASCOT		T
359		P20191202363_MD_SALIVA,17669	K.YYTNPIIEK.N	1140.59	0.00097	2	1	35.7	0	1.35e-05	0|0	tr|K0D9J4|K0D9J4_9HEMI		6	0		0	2	MASCOT		T
360		P20191202363_MD_SALIVA,18542	K.YYTNPIIEK.N	1140.59	0.00336	2	1	27.89	0	8.13e-05	0|0	tr|K0D9J4|K0D9J4_9HEMI		6	0		0	2	MASCOT		T
361		P20191202363_MD_SALIVA,19363	K.YYTNPIIEK.N	1140.59	0.00151	2	1	34.44	0	1.8e-05	0|0	tr|K0D9J4|K0D9J4_9HEMI		6	0		0	2	MASCOT		T
362		P20191202363_MD_SALIVA,19881	K.YYTNPIIEK.N	1140.59	0.0014	2	1	25.23	0	0.00015	0|0	tr|K0D9J4|K0D9J4_9HEMI		6	0		0	2	MASCOT		T
363		P20191202363_MD_SALIVA,25826	K.YYTNPIIEK.N	1140.59	0.00179	2	1	31.35	0	3.66e-05	0|0	tr|K0D9J4|K0D9J4_9HEMI		6	0		0	2	MASCOT		T
364		P20191202363_MD_SALIVA,31175	K.YYTNPIIEK.N	1140.59	-0.00059	2	1	22.22	0	0.0003	0|0	tr|K0D9J4|K0D9J4_9HEMI		6	0		0	2	MASCOT		T
365		P20191202363_MD_SALIVA,46811	K.YYTNPIIEK.N	1140.59	-0.00085	2	1	22.59	0	0.000275	0|0	tr|K0D9J4|K0D9J4_9HEMI		6	0		0	2	MASCOT		T
366		P20191202363_MD_SALIVA,19629	R.CGLNPNYLMK.I	1209.58	0.00185	2	1	39.65	0	1.08e-05	0|0	tr|K0D9J4|K0D9J4_9HEMI		8.2	0		0	2	MASCOT		T
367		P20191202363_MD_SALIVA,15366	R.DVNPDWSTYDK.A	1339.58	0.00099	2	1	35.9	0	1.29e-05	0|0	tr|K0D9J4|K0D9J4_9HEMI		3.93	0		0	2	MASCOT		T
368		P20191202363_MD_SALIVA,15733	R.DVNPDWSTYDK.A	1339.58	0.00193	2	1	43.15	0	2.42e-06	0|0	tr|K0D9J4|K0D9J4_9HEMI		3.93	0		0	2	MASCOT		T
369		P20191202363_MD_SALIVA,16514	R.DVNPDWSTYDK.A	1339.58	0.00507	2	1	60.26	0	4.71e-08	0|0	tr|K0D9J4|K0D9J4_9HEMI		3.93	0		0	2	MASCOT		T
370		P20191202363_MD_SALIVA,16783	R.DVNPDWSTYDK.A	1339.58	-0.00015	2	1	78.16	0	7.64e-10	0|0	tr|K0D9J4|K0D9J4_9HEMI		3.93	0		0	2	MASCOT		T
371		P20191202363_MD_SALIVA,16994	R.DVNPDWSTYDK.A	1339.58	0.00151	2	1	57.17	0	9.59e-08	0|0	tr|K0D9J4|K0D9J4_9HEMI		3.93	0		0	2	MASCOT		T
372		P20191202363_MD_SALIVA,17229	R.DVNPDWSTYDK.A	1339.58	0.00167	2	1	77.95	0	8.02e-10	0|0	tr|K0D9J4|K0D9J4_9HEMI		3.93	0		0	2	MASCOT		T
373		P20191202363_MD_SALIVA,17466	R.DVNPDWSTYDK.A	1339.58	0.00141	2	1	60.14	0	4.84e-08	0|0	tr|K0D9J4|K0D9J4_9HEMI		3.93	0		0	2	MASCOT		T
374		P20191202363_MD_SALIVA,17713	R.DVNPDWSTYDK.A	1339.58	0.00143	2	1	73.49	0	2.24e-09	0|0	tr|K0D9J4|K0D9J4_9HEMI		3.93	0		0	2	MASCOT		T
375		P20191202363_MD_SALIVA,18496	R.DVNPDWSTYDK.A	1339.58	0.00217	2	1	56.39	0	1.15e-07	0|0	tr|K0D9J4|K0D9J4_9HEMI		3.93	0		0	2	MASCOT		T
376		P20191202363_MD_SALIVA,18938	R.DVNPDWSTYDK.A	1339.58	0.00295	2	1	54.96	0	1.6e-07	0|0	tr|K0D9J4|K0D9J4_9HEMI		3.93	0		0	2	MASCOT		T
377		P20191202363_MD_SALIVA,19236	R.DVNPDWSTYDK.A	1339.58	0.00435	2	1	59.94	0	5.07e-08	0|0	tr|K0D9J4|K0D9J4_9HEMI		3.93	0		0	2	MASCOT		T
378		P20191202363_MD_SALIVA,20597	R.DVNPDWSTYDK.A	1339.58	0.00397	2	1	36.46	0	1.13e-05	0|0	tr|K0D9J4|K0D9J4_9HEMI		3.93	0		0	2	MASCOT		T
379		P20191202363_MD_SALIVA,20860	R.DVNPDWSTYDK.A	1339.58	0.00297	2	1	36.67	0	1.08e-05	0|0	tr|K0D9J4|K0D9J4_9HEMI		3.93	0		0	2	MASCOT		T
380		P20191202363_MD_SALIVA,22096	R.DVNPDWSTYDK.A	1339.58	0.00067	2	1	26.76	0	0.000105	0|0	tr|K0D9J4|K0D9J4_9HEMI		3.93	0		0	2	MASCOT		T
381		P20191202363_MD_SALIVA,22416	R.DVNPDWSTYDK.A	1339.58	-0.00063	2	1	24.06	0	0.000196	0|0	tr|K0D9J4|K0D9J4_9HEMI		3.93	0		0	2	MASCOT		T
382		P20191202363_MD_SALIVA,24056	R.DVNPDWSTYDK.A	1339.58	-0.00163	2	1	56.82	0	1.04e-07	0|0	tr|K0D9J4|K0D9J4_9HEMI		3.93	0		0	2	MASCOT		T
383		P20191202363_MD_SALIVA,24668	R.DVNPDWSTYDK.A	1339.58	0.00099	2	1	22.94	0	0.000254	0|0	tr|K0D9J4|K0D9J4_9HEMI		3.93	0		0	2	MASCOT		T
384		P20191202363_MD_SALIVA,40187	R.DVNPDWSTYDK.A	1339.58	-0.00127	2	1	35.62	0	1.37e-05	0|0	tr|K0D9J4|K0D9J4_9HEMI		3.93	0		0	2	MASCOT		T
385		P20191202363_MD_SALIVA,45781	R.DVNPDWSTYDK.A	1339.58	0.00153	2	1	21.22	0	0.000378	0|0	tr|K0D9J4|K0D9J4_9HEMI		3.93	0		0	2	MASCOT		T
386		P20191202363_MD_SALIVA,47510	R.DVNPDWSTYDK.A	1339.58	0.00319	2	1	23.3	0	0.000234	0|0	tr|K0D9J4|K0D9J4_9HEMI		3.93	0		0	2	MASCOT		T
387		P20191202363_MD_SALIVA,11412	R.ERIPSQTTM*NNITQEM*LR.C	2194.06	0.0049	3	1	33.99	0	2e-05	0|0	tr|K0D9J4|K0D9J4_9HEMI		6.24	1	15.994919 Oxidation (M)	0	2	MASCOT		T
388		P20191202363_MD_SALIVA,17445	R.ERIPSQTTMNNITQEM*LR.C	2178.06	0.00178	3	1	53.26	0	2.36e-07	0|0	tr|K0D9J4|K0D9J4_9HEMI		6.24	1	15.994919 Oxidation (M)	0	2	MASCOT		T
389		P20191202363_MD_SALIVA,25991	R.EYTVAVIGADDCWK.E	1626.75	0.00518	2	1	37.98	0	7.96e-06	0|0	tr|K0D9J4|K0D9J4_9HEMI		4.03	0		0	2	MASCOT		T
390		P20191202363_MD_SALIVA,26236	R.EYTVAVIGADDCWK.E	1626.75	0.00218	2	1	72.14	0	3.05e-09	0|0	tr|K0D9J4|K0D9J4_9HEMI		4.03	0		0	2	MASCOT		T
391		P20191202363_MD_SALIVA,26499	R.EYTVAVIGADDCWK.E	1626.75	-0.01014	2	1	22.25	0	0.000298	0|0	tr|K0D9J4|K0D9J4_9HEMI		4.03	0		0	2	MASCOT		T
392		P20191202363_MD_SALIVA,2783	R.MVM*DR.G	667.29	-9e-05	2	1	28.16	0	7.64e-05	0|0	tr|K0D9J4|K0D9J4_9HEMI		5.59	0	15.994919 Oxidation (M)	0	2	MASCOT		T
393		P20191202363_MD_SALIVA,3956	R.MVMDR.G	651.295	0.00061	2	1	32.37	0	2.9e-05	0|0	tr|K0D9J4|K0D9J4_9HEMI		5.59	0		0	2	MASCOT		T
394		P20191202363_MD_SALIVA,4149	R.MVMDR.G	651.295	0.00033	2	1	32.83	0	2.61e-05	0|0	tr|K0D9J4|K0D9J4_9HEMI		5.59	0		0	2	MASCOT		T
395		P20191202363_MD_SALIVA,4399	R.MVMDR.G	651.295	0.00075	2	1	21.11	0	0.000387	0|0	tr|K0D9J4|K0D9J4_9HEMI		5.59	0		0	2	MASCOT		T
396		P20191202363_MD_SALIVA,4605	R.MVMDR.G	651.295	0.00029	2	1	26.17	0	0.000121	0|0	tr|K0D9J4|K0D9J4_9HEMI		5.59	0		0	2	MASCOT		T
397		P20191202363_MD_SALIVA,6378	R.MVMDR.G	651.295	-0.00065	2	1	26.1	0	0.000123	0|0	tr|K0D9J4|K0D9J4_9HEMI		5.59	0		0	2	MASCOT		T
398		P20191202363_MD_SALIVA,9528	R.MVMDR.G	651.295	0.00011	2	1	21.68	0	0.00034	0|0	tr|K0D9J4|K0D9J4_9HEMI		5.59	0		0	2	MASCOT		T
399		P20191202363_MD_SALIVA,49	R.TGEVHM*TR.S	946.441	-0.00129	2	1	20.93	0	0.000404	0|0	tr|K0D9J4|K0D9J4_9HEMI		6.41	0	15.994919 Oxidation (M)	0	2	MASCOT		T
400		P20191202363_MD_SALIVA,181	R.TGEVHM*TR.S	946.441	-5e-05	2	1	30.07	0	4.92e-05	0|0	tr|K0D9J4|K0D9J4_9HEMI		6.41	0	15.994919 Oxidation (M)	0	2	MASCOT		T
401		P20191202363_MD_SALIVA,248	R.TGEVHM*TR.S	946.441	-0.00065	3	1	24.91	0	0.000161	0|0	tr|K0D9J4|K0D9J4_9HEMI		6.41	0	15.994919 Oxidation (M)	0	2	MASCOT		T
402		P20191202363_MD_SALIVA,319	R.TGEVHM*TR.S	946.441	0.00101	2	1	37.51	0	8.87e-06	0|0	tr|K0D9J4|K0D9J4_9HEMI		6.41	0	15.994919 Oxidation (M)	0	2	MASCOT		T
403		P20191202363_MD_SALIVA,454	R.TGEVHM*TR.S	946.441	0.00255	2	1	39.16	0	6.07e-06	0|0	tr|K0D9J4|K0D9J4_9HEMI		6.41	0	15.994919 Oxidation (M)	0	2	MASCOT		T
404		P20191202363_MD_SALIVA,523	R.TGEVHM*TR.S	946.441	0.00019	3	1	21.21	0	0.000378	0|0	tr|K0D9J4|K0D9J4_9HEMI		6.41	0	15.994919 Oxidation (M)	0	2	MASCOT		T
405		P20191202363_MD_SALIVA,591	R.TGEVHM*TR.S	946.441	0.00025	2	1	25.56	0	0.000139	0|0	tr|K0D9J4|K0D9J4_9HEMI		6.41	0	15.994919 Oxidation (M)	0	2	MASCOT		T
406		P20191202363_MD_SALIVA,660	R.TGEVHM*TR.S	946.441	0.00028	3	1	28.83	0	6.55e-05	0|0	tr|K0D9J4|K0D9J4_9HEMI		6.41	0	15.994919 Oxidation (M)	0	2	MASCOT		T
407		P20191202363_MD_SALIVA,724	R.TGEVHM*TR.S	946.441	0.00073	2	1	63.57	0	2.2e-08	0|0	tr|K0D9J4|K0D9J4_9HEMI		6.41	0	15.994919 Oxidation (M)	0	2	MASCOT		T
408		P20191202363_MD_SALIVA,797	R.TGEVHM*TR.S	946.441	-0.00086	3	1	26.73	0	0.000106	0|0	tr|K0D9J4|K0D9J4_9HEMI		6.41	0	15.994919 Oxidation (M)	0	2	MASCOT		T
409		P20191202363_MD_SALIVA,862	R.TGEVHM*TR.S	946.441	9e-05	2	1	40.87	0	4.09e-06	0|0	tr|K0D9J4|K0D9J4_9HEMI		6.41	0	15.994919 Oxidation (M)	0	2	MASCOT		T
410		P20191202363_MD_SALIVA,1002	R.TGEVHM*TR.S	946.441	-0.00013	2	1	34.96	0	1.6e-05	0|0	tr|K0D9J4|K0D9J4_9HEMI		6.41	0	15.994919 Oxidation (M)	0	2	MASCOT		T
411		P20191202363_MD_SALIVA,1495	R.TGEVHM*TR.S	946.441	0.00057	2	1	40.55	0	4.41e-06	0|0	tr|K0D9J4|K0D9J4_9HEMI		6.41	0	15.994919 Oxidation (M)	0	2	MASCOT		T
412		P20191202363_MD_SALIVA,1789	R.TGEVHM*TR.S	946.441	-0.00087	2	1	35.54	0	1.4e-05	0|0	tr|K0D9J4|K0D9J4_9HEMI		6.41	0	15.994919 Oxidation (M)	0	2	MASCOT		T
413		P20191202363_MD_SALIVA,2281	R.TGEVHM*TR.S	946.441	-0.00051	2	1	49.06	0	6.21e-07	0|0	tr|K0D9J4|K0D9J4_9HEMI		6.41	0	15.994919 Oxidation (M)	0	2	MASCOT		T
414		P20191202363_MD_SALIVA,3196	R.TGEVHMTR.S	930.446	0.00079	3	1	29.01	0	6.28e-05	0|0	tr|K0D9J4|K0D9J4_9HEMI		6.41	0		0	2	MASCOT		T
415		P20191202363_MD_SALIVA,3396	R.TGEVHMTR.S	930.446	0.00164	2	1	43.26	0	2.36e-06	0|0	tr|K0D9J4|K0D9J4_9HEMI		6.41	0		0	2	MASCOT		T
416		P20191202363_MD_SALIVA,13382	R.YKNPLFPK.K	1006.57	0.00054	2	1	27.1	0	9.75e-05	0|0	tr|K0D9J4|K0D9J4_9HEMI		9.7	1		0	2	MASCOT		T
	$2-1	tr|K0D9J0|K0D9J0_9HEMI Glucose dehydrogenase like-protein 2 (Fragment) OS=Metopolophium dirhodum OX=44670 GN=gld-2 PE=2 SV=1	4	4	0.1568	26320.6	4.78
		P20191202363_MD_SALIVA,25215	K.FLTEQEDNLFK.G	1383.68	0.00208	2	1	73.23	0	2.38e-09	0|0	tr|K0D9J0|K0D9J0_9HEMI		4.14	0		0	2	MASCOT		T
		P20191202363_MD_SALIVA,22655	K.YDFDEWEK.S	1131.46	-0.00062	2	1	28.06	0	7.82e-05	0|0	tr|K0D9J0|K0D9J0_9HEMI		3.92	0		0	2	MASCOT		T
		P20191202363_MD_SALIVA,26064	K.YPNDFTPTLLSGESK.I	1668.81	0.00281	2	1	90.09	0	4.9e-11	0|0	tr|K0D9J0|K0D9J0_9HEMI		4.37	0		0	2	MASCOT		T
		P20191202363_MD_SALIVA,17701	R.GTKYDFDEWEK.S	1417.63	0.00264	2	1	59.84	0	5.19e-08	0|0	tr|K0D9J0|K0D9J0_9HEMI		4.32	1		0	2	MASCOT		T
	$3-1	tr|K0DCK7|K0DCK7_9HEMI Glucose dehydrogenase like-protein 1 (Fragment) OS=Metopolophium dirhodum OX=44670 GN=gld-1 PE=2 SV=1	2	2	0.0721	23602.7	8.45
		P20191202363_MD_SALIVA,17964	K.EPVVGYGNFDSTTR.N	1541.72	0.00436	2	1	61.19	0	3.8e-08	0|0	tr|K0DCK7|K0DCK7_9HEMI		4.37	0		0	2	MASCOT		T
		P20191202363_MD_SALIVA,13407	R.KEPVVGYGNFDSTTR.N	1669.82	-0.00171	3	1	61.75	0	3.34e-08	0|0	tr|K0DCK7|K0DCK7_9HEMI		6.07	1		0	2	MASCOT		T
	$4-1	tr|Q2QKZ1|Q2QKZ1_9HEMI Elongation factor 1 alpha (Fragment) OS=Metopolophium dirhodum OX=44670 GN=EF1a PE=4 SV=1	2	2	0.0664	30711	8.34
		P20191202363_MD_SALIVA,15564	K.IGGIGTVPVGR.V	1025.61	0.00042	2	1	41.63	0	3.44e-06	0|0	tr|Q2QKZ1|Q2QKZ1_9HEMI		9.75	0		0	2	MASCOT		T
		P20191202363_MD_SALIVA,17374	R.LPLQDVYK.I	975.551	0.00098	2	1	29.11	0	6.14e-05	0|0	tr|Q2QKZ1|Q2QKZ1_9HEMI		5.84	0		0	2	MASCOT		T
